# Supplementary material
Source: PubMed Central journal article supplement (PMC3877857)

## A diastereoselective oxa-Pictet-Spengler-based strategy for (+)-frenolicin B and *epi*(+)-frenolicin B synthesis

Yinan Zhang,<sup>†</sup> Xiachang Wang,<sup>†</sup> Manjula Sunkara,<sup>‡</sup> Qing Ye,<sup>§</sup> Larissa V. Ponomereva,<sup>†</sup> Qing-Bai She,<sup>§</sup> Andrew J. Morris,<sup>‡</sup> Jon S. Thorson<sup>†, \*</sup>

Center for Pharmaceutical Research and Innovation, College of Pharmacy, University of Kentucky, 789 South Limestone Street, Lexington, Kentucky 40536; Division of Cardiovascular Medicine, Gill Heart Institute, University of Kentucky; and Markey Cancer Center, University of Kentucky, 741 South Limestone Street, Lexington, Kentucky 40536, USA

### Contents:

|                                                                                   |     |
|-----------------------------------------------------------------------------------|-----|
| 1. Materials and Methods                                                          | S1  |
| 2. Synthesis of <b>1-2</b> , <b>5-14</b>                                          | S1  |
| 3. Cancer cell line cytotoxicity                                                  | S12 |
| 4. Literature cited                                                               | S12 |
| <b>Figure S1.</b> Cancer cell line cytotoxicity of compound <b>1</b> and <b>2</b> | S13 |
| <b>Table S1.</b> Lewis acid optimization of the oxa-Pictet-Spengler reaction      | S14 |
| 5. <sup>1</sup> H, <sup>13</sup> C NMR spectra                                    | S15 |

### 1. Materials and Methods

<sup>1</sup>H and <sup>13</sup>C NMR spectra were recorded on a Varian Unity Inova 400 MHz instrument (Palo Alto, CA). The chemical shifts were reported in  $\delta$  (ppm) using the <sup>1</sup>H NMR CDCl<sub>3</sub> ( $\delta$  7.26) or DMSO-d<sub>6</sub> ( $\delta$  2.50) and <sup>13</sup>C NMR CDCl<sub>3</sub> ( $\delta$  77.16) or DMSO-d<sub>6</sub> ( $\delta$  39.52) as internal standards where: *J* indicates coupling constants in Hz; s refers to singlet; d denotes doublet; t signifies triplet; q indicates quartet; and m refers to multiplet. HR-ESI-MS experiments were conducted using an AB SCIEX TripleTOF® 5600 System. HPLC analyses were performed using an Agilent 1260 system equipped (Santa Clara, CA) with a DAD detector and a Phenomenex (Torrance, CA) C18 column (150 × 4.6 mm, 0.5  $\mu$ m). Semi-preparative/preparative HPLC separation was performed using a Varian Prostar 210 HPLC system equipped with a PDA detector 330 using a Supelco (St. Louis, MO) C18 column (25 × 21.2 mm, 10  $\mu$ m; flow rate, 8 mL/min). Enantiomeric excess was determined by HPLC with a Chiralpak IC column (Tokyo, Japan), compared with racemic isomer. All commercially available reagents were used without further purification, purchased from Sigma-Aldrich (St. Louis, MO), TCI America (Tokyo, Japan) or Alfa-Aesar (Ward Hill, MA). The progress of the reactions was monitored by analytical thin-layer chromatography (TLC) from EMD Chemicals Inc. (Darmstadt, Germany) with fluorescence F<sub>254</sub> indicator. Silica gel (230–400 mesh) for column chromatography was purchased from Silicycle (Quebec City, Canada).

### 2. Synthesis of compounds **1-2** and **5-15**.

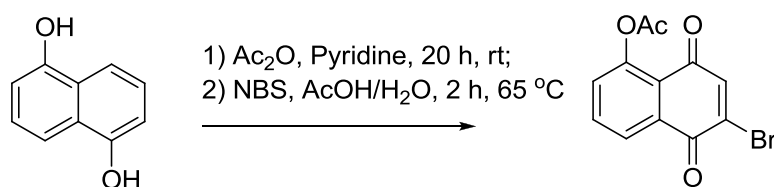

**6-Bromo-5,8-dioxo-5,8-dihydro-1-naphthyl acetate.**<sup>1</sup> To a solution of 1,5-dihydroxynaphthalene (16 g, 100 mmol) in pyridine (60 mL), Ac<sub>2</sub>O (70 mL, 750 mmol) was added in dropwise fashion over 30 min. The resulting mixture was stirred for 20 h at room temperature. The reaction was quenched via careful addition of water (30 mL) and the resulting mixture was poured onto ice (200 g) and then filtered to collect the dark-brown solid. The solid was dissolved in CH<sub>2</sub>Cl<sub>2</sub> (300 mL) and heated to reflux for 5 min.

After cooling to room temp, the solvent was filtered and the residue was carefully washed with CH<sub>2</sub>Cl<sub>2</sub> (100 mL x 2). The filtrate was concentrated to 200 mL under vacuum and loaded onto a short plug of silica gel resolved with 1:2 hexanes/ CH<sub>2</sub>Cl<sub>2</sub> (1000 mL) to afford the crude product. The crude product was recrystallized from benzene (approx. 0.4 M) to afford the product as pale yellow needles.

A solution of product from previous step in warm AcOH (425 mL, 45 °C) was added to a solution of N-bromosuccinimide in 45 °C AcOH (500 mL) and water (500 mL) through a cannulain less than 30 min (to avoid production of the dibrominated side product). After addition, the mixture was vigorously stirred at 45 °C for 40 min. The temperature was then elevated to 70 °C and the reaction stirred for an additional 1 hour until all visible precipitates were dissolved, resulting in a uniform orange solution. The reaction mixture was cooled to room temp, H<sub>2</sub>O (500 mL) was added and the mixture extracted with CH<sub>2</sub>Cl<sub>2</sub> (500 mL) and subsequently washed with CH<sub>2</sub>Cl<sub>2</sub> (200 mL x 2). The combined organic layers were then washed with saturated NaHCO<sub>3</sub> (300 mL), brine, dried over Na<sub>2</sub>SO<sub>4</sub>, filtered, and concentrated under vacuum. The residue was recrystallized in refluxed EtOH (approx. 0.14 M) to afford the product as an orange silky solid (16.1 g, 55 mmol, 55% yield). R<sub>f</sub> 0.50 (2:1 hexane/EtOAc); <sup>1</sup>H NMR (CDCl<sub>3</sub>, 400 MHz): δ = 8.15 (dd, *J* = 1.2, 8.0 Hz, 1H), 7.77 (t, *J* = 8.0 Hz, 1H), 7.42 (dd, *J* = 1.2, 8.0 Hz, 1H), 7.38 (s, 1H), 2.44 (s, 3H).

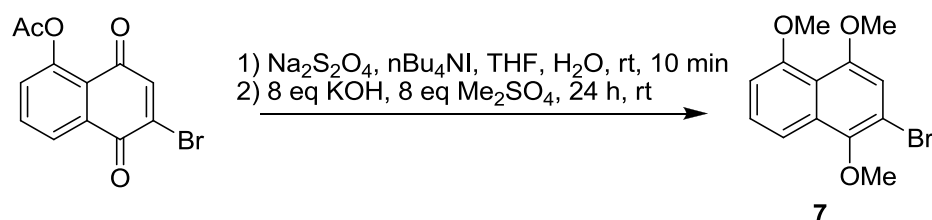

**2-Bromo-1,4,5-trimethoxynaphthalene (7).** To a solution of 6-bromo-5,8-dioxo-5,8-dihydronaphthalen-1-yl acetate (5.8 g, 20 mmol) and n-Bu<sub>4</sub>NBr (332 mg, 1 mmol) in THF (50 mL) and H<sub>2</sub>O (50 mL) was added sodium dithionite (10.5 g, 60 mmol), and the mixture was stirred for 10 min under argon. The organic layer was collected and 2N KOH solution (40 mL, 80 mmol) was added with stirring under argon. Me<sub>2</sub>SO<sub>4</sub> (7.6 mL, 80 mmol) was added to the mixture after 10 min and the resulting mixture was stirred for 4 h at room temp followed another addition of 2N KOH solution (40 mL, 80 mmol) and Me<sub>2</sub>SO<sub>4</sub> (7.6 mL, 80 mmol). The reaction was continued overnight with stirring and subsequently concentrated under vacuum. The residue was extracted with EtOAc (100 mL x 2) and combined organic extracts were washed with water (100 mL), brine (20 mL), dried over Na<sub>2</sub>SO<sub>4</sub>, filtered, and concentrated under vacuum. The residue was purified by silica gel chromatography using 25:1 hexane/EtOAc to provide **7** as a pale yellow oil (4.0 g, 13.5 mmol, 68% yield). R<sub>f</sub> 0.30 (10:1 hexane/EtOAc); <sup>1</sup>H NMR (CDCl<sub>3</sub>, 400 MHz): δ = 7.68 (dd, *J* = 0.8, 8.8 Hz, 1H), 7.44 (t, *J* = 8.0 Hz, 1H), 6.90 (s, 1H), 3.97 (s, 3H), 3.94 (s, 3H), 3.92 (s, 3H).

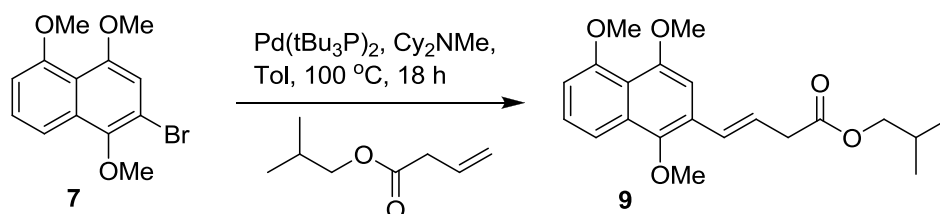

**(E)-Isobutyl 4-(1,4,5-trimethoxynaphthalen-2-yl)but-3-enoate (9).** To a solution of **7** (4.0 g, 13.5 mmol), isobutyl vinylacetate (4.3 mL, 27 mmol), and *N,N*-dicyclohexylmethyl amine (4.2 mL, 20 mmol) in toluene (70 mL) was added bis(tri-*t*-butylphosphine)palladium (137 mg, 0.27 mmol) under argon, and the mixture was refluxed for 16 h. The reaction was concentrated under vacuum and the residue

subsequently purified via silica column chromatography using 12:1 hexane/EtOAc to provide **9** (4.1 g, 11.4 mmol, 84% yield) as a pale yellow oil.  $R_f$  0.20 (10:1 hexane/EtOAc);  $^1\text{H NMR}$  ( $\text{CDCl}_3$ , 400 MHz):  $\delta$  = 7.69 (dd,  $J$  = 0.8, 8.8 Hz, 1H), 7.42 (t,  $J$  = 8.0 Hz, 1H), 6.96 (d,  $J$  = 16.0 Hz, 1H), 6.93 (s, 1H), 6.87 (d,  $J$  = 7.6 Hz, 1H), 6.41 (dt,  $J$  = 7.2, 16.0 Hz, 1H), 3.97 (s, 3H), 3.94 (s, 3H), 3.93-3.92 (m, 2H), 3.84 (s, 3H), 3.36 (dd,  $J$  = 1.6, 7.2 Hz, 2H), 1.99-1.96 (m, 1H), 0.95 (d,  $J$  = 6.8 Hz, 6H);  $^{13}\text{C NMR}$  ( $\text{CDCl}_3$ , 100 MHz):  $\delta$  = 171.9, 157.5, 153.7, 147.2, 131.8, 127.8, 127.1, 125.4, 123.3, 118.3, 115.2, 107.1, 103.4, 71.1, 62.4, 57.0, 56.6, 39.0, 27.9, 19.2 ppm.

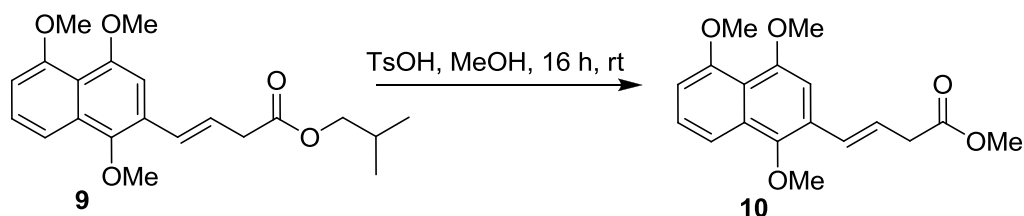

**(E)-Methyl 4-(1,4,5-trimethoxynaphthalen-2-yl)but-3-enoate (10).** A mixture of TsOH (2.6 g, 13.7 mmol) and **9** (4.1 g, 11.4 mmol) in MeOH (50 mL) was stirred for 24 h at room temp. The solution was concentrated and the residue was extracted with EtOAc (50 mL x 2). The combined extracts were washed with saturated aqueous  $\text{NaHCO}_3$  solution (50 mL), brine (20 mL), dried over  $\text{Na}_2\text{SO}_4$ , filtered, and concentrated under vacuum. The residue was purified via silica column chromatography using 8:1 hexane/EtOAc to afford the product as a pale yellow oil (2.7 g, 8.6 mmol, 75% yield).  $R_f$  0.20 (10/1 hexane/EtOAc);  $^1\text{H NMR}$  ( $\text{CDCl}_3$ , 400 MHz):  $\delta$  = 7.69 (dd,  $J$  = 0.8, 6.8 Hz, 1H), 7.40 (t,  $J$  = 8.0 Hz, 1H), 6.91 (d,  $J$  = 12.8 Hz, 1H), 6.87 (s, 1H), 6.85 (d,  $J$  = 6.8 Hz, 1H), 6.40 (dt,  $J$  = 5.6, 12.8 Hz, 1H), 3.98 (s, 3H), 3.97 (s, 3H), 3.84 (s, 3H), 3.75 (s, 3H), 3.36 (dd,  $J$  = 1.2, 5.6 Hz, 2H);  $^{13}\text{C NMR}$  ( $\text{CDCl}_3$ , 100 MHz):  $\delta$  = 172.2, 157.5, 153.7, 147.2, 131.8, 127.9, 127.1, 125.3, 122.9, 118.3, 115.2, 107.0, 103.2, 62.4, 56.9, 56.6, 52.1, 38.8 ppm.

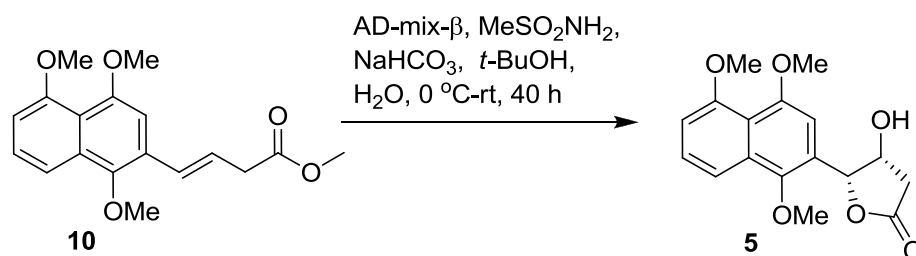

**(4R,5R)-4-hydroxy-5-(1,4,5-trimethoxynaphthalen-2-yl)dihydrofuran-2(3H)-one (5).** To a stirred solution of AD-mix- $\beta$  (12.0 g),  $\text{NaHCO}_3$  (2.18 g, 26.0 mmol) and  $\text{MeSO}_2\text{NH}_2$  (900 mg, 9.5 mmol) in  $t\text{BuOH}$  (30 mL)-water (40 mL) at 0 °C was added a solution of **10** (2.7 g, 8.6 mmol) in  $t\text{BuOH}$  (10 mL) in a dropwise fashion. The resulting turbid mixture was allowed to warm to room temp and the reaction was subsequently stirred for 40 h. The reaction was quenched with the addition of saturated aqueous  $\text{Na}_2\text{SO}_3$  (20 mL), and the aqueous layer extracted with EtOAc (100 mL x 2). The combined organics were washed with water (100 mL), brine (20 mL), dried over  $\text{Na}_2\text{SO}_4$ , and concentrated under vacuum. The residue was purified via silica column chromatography using 1:1 hexane/EtOAc to provide the product as a pale yellow solid (1.72 g, 5.4 mmol, 63% yield).  $R_f$  0.10 (2:1 hexane/EtOAc);  $^1\text{H NMR}$  ( $\text{CDCl}_3$ , 400 MHz):  $\delta$  = 7.57 (dd,  $J$  = 0.8, 8.4 Hz, 1H), 7.42 (t,  $J$  = 8.4 Hz, 1H), 6.88-6.86 (m, 2H), 5.84 (d,  $J$  = 3.6 Hz, 1H), 4.82 (dd,  $J$  = 3.6, 4.8 Hz, 1H), 3.94 (s, 3H), 3.93 (s, 3H), 3.87 (s, 3H), 3.02 (s, 1H), 2.92 (dd,  $J$  = 5.6, 18.0 Hz, 1H), 2.72 (d,  $J$  = 18.0 Hz, 1H);  $^{13}\text{C NMR}$  ( $\text{CDCl}_3$ , 100 MHz):  $\delta$  = 175.8, 157.7, 154.1, 146.0, 130.9, 127.3, 122.5, 118.6, 114.5, 107.3, 104.1, 82.0, 69.9, 62.1, 56.9, 56.7, 38.4 ppm; HPLC (Chiralpak IC, 20:80 *i*-propanol/hexane, flow rate 0.6 mL/min,  $\lambda$  = 254 nm):  $t_{\text{minor}}$  = 39.2

min,  $t_{\text{major}} = 41.8$  min, ee > 99.5%.

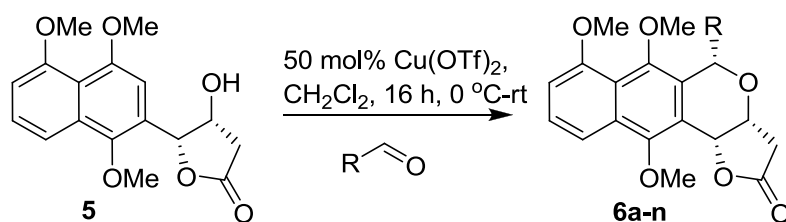

**General procedure for the Cu(OTf)<sub>2</sub> catalyzed oxa-Pictet-Spengler reaction (Scheme 2, main text).** To a solution of **5** (64 mg, 0.2 mmol) and Cu(OTf)<sub>2</sub> (36 mg, 0.1 mmol) in anhydrous CH<sub>2</sub>Cl<sub>2</sub> (2 mL) at 0 °C, the corresponding aldehyde (0.4 mmol) was added in a dropwise fashion with stirring. The temperature was allowed to warm to room temp with stirring for 16 h. After concentrating under vacuum, diastereoselectivity of the crude mixture was first assessed by NMR the reaction products were subsequently purified via silica column chromatography using hexane/EtOAc to afford the products **6a-n**.

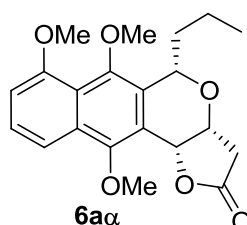

**Compound 6a $\alpha$** <sup>2</sup>: colorless oil, isolated yield 90%.  $R_f$  0.55 (1:1 hexane/EtOAc); <sup>1</sup>H NMR (400 MHz, CDCl<sub>3</sub>):  $\delta = 7.73$  (dd,  $J = 0.8, 8.4$  Hz, 1H), 7.45 (t,  $J = 8.4$  Hz, 1H), 6.95 (d,  $J = 8.4$  Hz, 1H), 5.64 (d,  $J = 2.4$  Hz, 1H), 5.06 (dd,  $J = 2.8, 7.2$  Hz, 1H), 4.38 (dd,  $J = 2.4, 4.4$  Hz, 1H), 4.09 (s, 3H), 4.01 (s, 3H), 3.77 (s, 3H), 2.96 (dd,  $J = 4.4, 17.2$  Hz, 1H), 2.83 (d,  $J = 17.2$  Hz, 1H), 2.19-1.97 (m, 2H), 1.43-1.25 (m, 2H), 0.88 (t,  $J = 7.6$  Hz, 3H); <sup>13</sup>C NMR (100 MHz, CDCl<sub>3</sub>)  $\delta = 177.7, 156.2, 153.4, 149.0, 130.3, 128.1, 126.8, 121.7, 119.3, 115.3, 107.5, 73.9, 73.3, 71.0, 64.7, 61.8, 56.4, 38.9, 37.7, 18.4, 14.0$  ppm; HRMS (ESI)  $m/z$  [M + H]<sup>+</sup> calcd for C<sub>21</sub>H<sub>25</sub>O<sub>6</sub> 373.1651, found 373.1652.

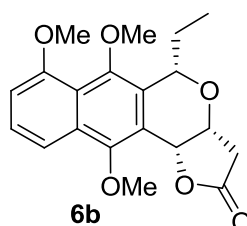

**Compound 6b**: colorless oil, isolated yield 84%.  $R_f$  0.55 (1:1 hexane/EtOAc); <sup>1</sup>H NMR (400 MHz, CDCl<sub>3</sub>):  $\delta = 7.73$  (d,  $J = 8.4$  Hz, 1H), 7.44 (t,  $J = 8.0$  Hz, 1H), 6.94 (d,  $J = 7.6$  Hz, 1H), 5.59 (s, 1H), 5.04 (t,  $J = 4.0$  Hz, 1H), 4.36 (s, 1H), 4.09 (s, 3H), 4.02 (s, 3H), 3.74 (s, 3H), 2.90 (dd,  $J = 4.4, 17.2$  Hz, 1H), 2.78 (d,  $J = 17.2$  Hz, 1H), 2.21-2.16 (m, 2H), 0.83 (t,  $J = 7.6$  Hz, 3H); <sup>13</sup>C NMR (100 MHz, CDCl<sub>3</sub>)  $\delta = 176.1, 156.3, 153.2, 149.3, 130.3, 127.6, 126.7, 121.6, 119.9, 115.2, 107.3, 74.3, 73.2, 71.1, 64.7, 61.8, 56.4, 38.6, 28.5, 9.5$  ppm; HRMS (ESI)  $m/z$  [M + H]<sup>+</sup> calcd for C<sub>20</sub>H<sub>23</sub>O<sub>6</sub> 359.1495, found 359.1484.

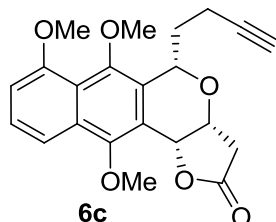

**Compound 6c:** colorless oil, isolated yield 92%.  $R_f$  0.50 (1:1 hexane/EtOAc);  $^1\text{H NMR}$  (400 MHz,  $\text{CDCl}_3$ ):  $\delta$  = 7.72 (d,  $J$  = 8.4 Hz, 1H), 7.44 (t,  $J$  = 8.0 Hz, 1H), 6.94 (d,  $J$  = 8.0 Hz, 1H), 5.58 (d,  $J$  = 2.0 Hz, 1H), 5.16 (dd,  $J$  = 2.4, 8.0 Hz, 1H), 4.36 (dd,  $J$  = 2.4, 4.0 Hz, 1H), 4.08 (s, 3H), 4.01 (s, 3H), 3.75 (s, 3H), 2.89 (dd,  $J$  = 4.0, 17.2 Hz, 1H), 2.76 (d,  $J$  = 17.2 Hz, 1H), 2.70-2.66 (m, 1H), 2.43-2.39 (m, 1H), 2.20-2.03 (m, 2H), 1.92 (t,  $J$  = 2.4 Hz, 1H);  $^{13}\text{C NMR}$  (100 MHz,  $\text{CDCl}_3$ )  $\delta$  = 175.8, 156.3, 153.3, 149.5, 130.4, 127.1, 126.8, 121.7, 119.5, 115.2, 107.4, 84.5, 73.1, 71.9, 71.2, 68.3, 64.6, 61.8, 56.4, 38.5, 34.1, 14.7 ppm; HRMS (ESI)  $m/z$   $[\text{M} + \text{H}]^+$  calcd for  $\text{C}_{22}\text{H}_{23}\text{O}_6$  383.1495, found 383.1479.

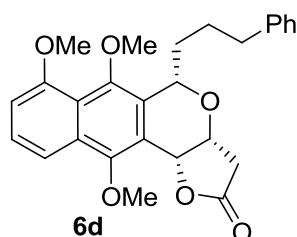

**Compound 6d:** colorless oil, isolated yield 83%.  $R_f$  0.60 (1:1 hexane/EtOAc);  $^1\text{H NMR}$  (400 MHz,  $\text{CDCl}_3$ ):  $\delta$  = 7.73 (d,  $J$  = 8.4 Hz, 1H), 7.44 (t,  $J$  = 8.0 Hz, 1H), 7.24-7.16 (m, 5H), 6.94 (d,  $J$  = 7.6 Hz, 1H), 5.59 (s, 1H), 5.06 (d,  $J$  = 6.8 Hz, 1H), 4.33 (s, 1H), 4.09 (s, 3H), 4.02 (s, 3H), 3.72 (s, 3H), 2.89 (dd,  $J$  = 4.0, 17.2 Hz, 1H), 2.77 (d,  $J$  = 17.2 Hz, 1H), 2.64-2.58 (m, 2H), 2.33-2.32 (m, 1H), 2.10-2.07 (m, 1H), 1.75-1.71 (s, 2H);  $^{13}\text{C NMR}$  (100 MHz,  $\text{CDCl}_3$ )  $\delta$  = 176.0, 156.3, 153.2, 149.3, 142.8, 130.3, 128.5 (2C), 128.3 (2C), 127.8, 126.7, 125.6, 121.6, 119.6, 115.2, 107.4, 73.3, 73.1, 71.1, 64.7, 61.8, 56.4, 38.6, 35.8, 35.3, 27.1 ppm; HRMS (ESI)  $m/z$   $[\text{M} + \text{H}]^+$  calcd for  $\text{C}_{27}\text{H}_{29}\text{O}_6$  449.1964, found 449.1956.

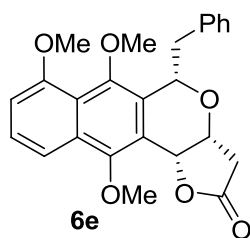

**Compound 6e:** colorless oil, isolated yield 95%.  $R_f$  0.60 (1:1 hexane/EtOAc);  $^1\text{H NMR}$  (400 MHz,  $\text{CDCl}_3$ ):  $\delta$  = 7.74 (d,  $J$  = 8.4 Hz, 1H), 7.46 (t,  $J$  = 8.0 Hz, 1H), 7.28-7.20 (m, 5H), 6.96 (d,  $J$  = 7.6 Hz, 1H), 5.56 (d,  $J$  = 1.2 Hz, 1H), 5.16 (d,  $J$  = 7.6 Hz, 1H), 4.27 (s, 1H), 4.06 (s, 3H), 4.05 (s, 3H), 3.86 (s, 3H), 2.93-2.81 (m, 2H), 2.72 (d,  $J$  = 17.2 Hz, 2H);  $^{13}\text{C NMR}$  (100 MHz,  $\text{CDCl}_3$ )  $\delta$  = 176.0, 156.2, 153.3, 149.4, 139.4, 130.4, 129.9 (2C), 128.1 (2C), 127.5, 126.8, 126.2, 121.7, 119.3, 115.3, 107.5, 74.6, 72.9, 71.0, 64.7, 61.9, 56.5, 42.7, 38.6 ppm; HRMS (ESI)  $m/z$   $[\text{M} + \text{H}]^+$  calcd for  $\text{C}_{25}\text{H}_{25}\text{O}_6$  421.1651, found 421.1644.

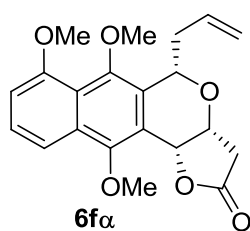

**Compound 6f $\alpha$** : colorless oil, isolated yield 50%.  $R_f$  0.55 (1:1 hexane/EtOAc);  $^1\text{H NMR}$  (400 MHz,  $\text{CDCl}_3$ ):  $\delta$  = 7.74 (dd,  $J$  = 0.8, 8.4 Hz, 1H), 7.45 (t,  $J$  = 8.0 Hz, 1H), 6.95 (d,  $J$  = 7.6 Hz, 1H), 5.88-5.81 (m, 1H), 5.60 (d,  $J$  = 2.4 Hz, 1H), 5.11-4.99 (m, 3H), 4.37 (dd,  $J$  = 2.4, 4.4 Hz, 1H), 4.09 (s, 3H), 4.02 (s, 3H), 3.77 (s, 3H), 3.09-3.05 (m, 1H), 2.91 (dd,  $J$  = 4.4, 17.2 Hz, 1H), 2.82 (d,  $J$  = 17.2 Hz, 1H), 2.77-2.70 (m, 1H);  $^{13}\text{C NMR}$  (100 MHz,  $\text{CDCl}_3$ )  $\delta$  = 176.0, 156.3, 153.2, 149.3, 135.1, 130.4, 127.3, 126.8, 121.7, 119.5, 117.1, 115.3, 107.5, 73.4, 73.0, 71.2, 64.8, 61.9, 56.5, 39.9, 38.6 ppm; HRMS (ESI)  $m/z$   $[\text{M} + \text{H}]^+$  calcd for  $\text{C}_{21}\text{H}_{23}\text{O}_6$  371.1495, found 371.1463.

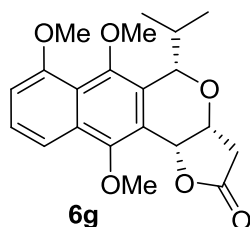

**Compound 6g**: colorless oil, isolated yield 81%.  $R_f$  0.70 (1:1 hexane/EtOAc);  $^1\text{H NMR}$  (400 MHz,  $\text{CDCl}_3$ ):  $\delta$  = 7.72 (d,  $J$  = 8.4 Hz, 1H), 7.43 (t,  $J$  = 8.0 Hz, 1H), 6.92 (d,  $J$  = 8.0 Hz, 1H), 5.57 (s, 1H), 4.97 (s, 1H), 4.31 (s, 1H), 4.09 (s, 3H), 4.00 (s, 3H), 3.74 (s, 3H), 2.88 (dd,  $J$  = 4.4, 17.2 Hz, 1H), 2.75 (d,  $J$  = 17.2 Hz, 1H), 1.13 (d,  $J$  = 7.6 Hz, 3H), 0.99-0.95 (m, 1H), 0.53 (d,  $J$  = 7.2 Hz, 3H);  $^{13}\text{C NMR}$  (100 MHz,  $\text{CDCl}_3$ )  $\delta$  = 176.2, 156.2, 153.1, 149.3, 130.2, 127.8, 126.6, 121.6, 119.9, 115.2, 107.2, 76.8, 73.1, 70.6, 64.7, 61.8, 56.3, 38.5, 32.2, 20.3, 15.3 ppm; HRMS (ESI)  $m/z$   $[\text{M} + \text{H}]^+$  calcd for  $\text{C}_{21}\text{H}_{25}\text{O}_6$  373.1651, found 373.1647.

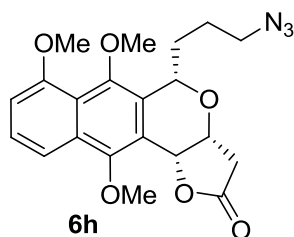

**Compound 6h**: colorless oil, isolated yield 90%.  $R_f$  0.40 (1:1 hexane/EtOAc);  $^1\text{H NMR}$  (400 MHz,  $\text{CDCl}_3$ ):  $\delta$  = 7.73 (dd,  $J$  = 0.8, 8.4 Hz, 1H), 7.45 (t,  $J$  = 8.0 Hz, 1H), 6.94 (d,  $J$  = 7.6 Hz, 1H), 5.58 (d,  $J$  = 2.4 Hz, 1H), 5.08 (dd,  $J$  = 2.8, 6.8 Hz, 1H), 4.35 (dd,  $J$  = 2.4, 4.0 Hz, 1H), 4.09 (s, 3H), 4.01 (s, 3H), 3.74 (s, 3H), 3.25-3.23 (m, 2H), 2.91 (dd,  $J$  = 4.0, 17.2 Hz, 1H), 2.77 (d,  $J$  = 17.2 Hz, 1H), 2.33-2.32 (m, 1H), 2.17-2.03 (m, 1H), 1.72-1.60 (m, 2H);  $^{13}\text{C NMR}$  (100 MHz,  $\text{CDCl}_3$ )  $\delta$  = 175.8, 156.3, 153.3, 149.4, 130.4, 127.1, 126.9, 121.6, 119.5, 115.2, 107.5, 73.0, 73.0, 71.2, 64.7, 61.7, 56.4, 51.5, 38.5, 32.4, 24.6 ppm; HRMS (ESI)  $m/z$   $[\text{M} + \text{H}]^+$  calcd for  $\text{C}_{21}\text{H}_{24}\text{N}_3\text{O}_6$  414.1665, found 414.1671.

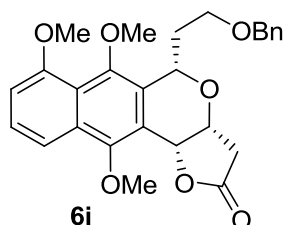

**Compound 6i**: colorless solid, isolated yield 80%.  $R_f$  0.55 (1:1 hexane/EtOAc);  $^1\text{H NMR}$  (400 MHz,  $\text{CDCl}_3$ ):  $\delta$  = 7.72 (dd,  $J$  = 8.0 Hz, 1H), 7.44 (t,  $J$  = 8.0 Hz, 1H), 7.29-7.26 (m, 5H), 6.94 (d,  $J$  = 7.6 Hz, 1H), 5.58 (d,  $J$  = 2.0 Hz, 1H), 5.21 (dd,  $J$  = 2.4, 8.4 Hz, 1H), 4.50 (dd,  $J$  = 12.0, 32.4 Hz, 2H), 4.34 (dd,  $J$  = 2.4, 4.0 Hz, 1H), 4.07 (s, 3H), 4.01 (s, 3H), 3.81-3.79 (m, 1H), 3.75 (s, 3H), 3.56-3.54 (m, 1H), 2.92-2.86 (m, 2H), 2.74 (d,  $J$  = 17.2 Hz, 1H), 2.08-2.05 (m, 1H);  $^{13}\text{C NMR}$  (100 MHz,  $\text{CDCl}_3$ )  $\delta$  = 175.9,

156.3, 153.2, 149.4, 139.0, 130.3, 128.2 (2C), 127.8, 127.5 (2C), 127.3, 126.7, 121.7, 119.5, 115.2, 107.4, 73.1, 72.6, 71.2, 70.6, 66.7, 64.5, 61.7, 56.3, 38.5, 35.3 ppm; HRMS (ESI)  $m/z$   $[M + H]^+$  calcd for  $C_{27}H_{29}O_7$  465.1913, found 465.1907.

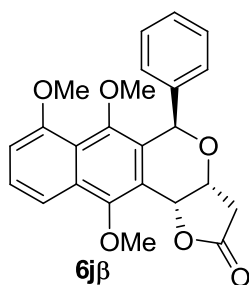

**Compound 6j $\beta$** : colorless solid, isolated yield 74%.  $R_f$  0.65 (1:1 hexane/EtOAc);  $^1H$  NMR (400 MHz,  $CDCl_3$ ):  $\delta$  = 7.76 (dd,  $J$  = 8.8 Hz, 1H), 7.46 (t,  $J$  = 8.4 Hz, 1H), 7.26-7.25 (m, 3H), 7.08 (d,  $J$  = 4.0 Hz, 2H), 6.93 (d,  $J$  = 8.0 Hz, 1H), 6.36 (s, 1H), 5.57 (d,  $J$  = 2.8 Hz, 1H), 4.31 (dd,  $J$  = 2.4, 4.8 Hz, 1H), 4.11 (s, 3H), 3.96 (s, 3H), 3.56 (s, 3H), 2.84 (dd,  $J$  = 5.2, 17.6 Hz, 1H), 2.63 (d,  $J$  = 18.0 Hz, 1H);  $^{13}C$  NMR (100 MHz,  $CDCl_3$ )  $\delta$  = 175.3, 156.3, 153.0, 148.6, 139.3, 130.6, 128.7 (2C), 128.4 (2C), 128.3, 126.7, 124.8, 121.4, 119.6, 115.3, 107.1, 73.2, 72.2, 66.7, 64.1, 62.2, 56.1, 37.4 ppm; HRMS (ESI)  $m/z$   $[M + H]^+$  calcd for  $C_{24}H_{23}O_6$  407.1495, found 407.1494.

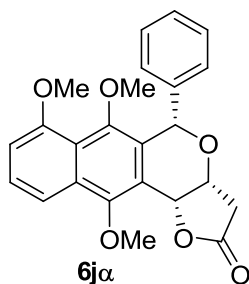

**Compound 6j $\alpha$** : colorless solid, isolated yield 25%.  $R_f$  0.45 (1:1 hexane/EtOAc);  $^1H$  NMR (400 MHz,  $CDCl_3$ ):  $\delta$  = 7.76 (d,  $J$  = 8.4 Hz, 1H), 7.45 (t,  $J$  = 8.4 Hz, 1H), 7.33-7.26 (m, 5H), 6.89 (d,  $J$  = 7.6 Hz, 1H), 5.98 (s, 1H), 5.67 (d,  $J$  = 2.0 Hz, 1H), 4.50 (s, 1H), 4.17 (s, 3H), 3.91 (s, 3H), 3.07 (s, 3H), 2.90 (dd,  $J$  = 4.0, 17.2 Hz, 1H), 2.72 (d,  $J$  = 16.8 Hz, 1H);  $^{13}C$  NMR (100 MHz,  $CDCl_3$ )  $\delta$  = 175.7, 156.2, 153.2, 149.4, 143.2, 130.8, 128.6 (2C), 128.5 (2C), 128.2, 127.1, 126.9, 121.7, 119.4, 115.2, 107.2, 76.7, 72.6, 71.9, 64.7, 61.4, 56.2, 37.5 ppm; HRMS (ESI)  $m/z$   $[M + H]^+$  calcd for  $C_{24}H_{23}O_6$  407.1495, found 407.1494.

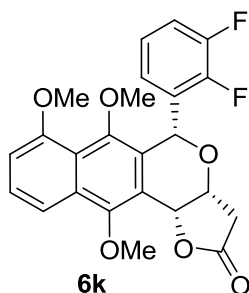

**Compound 6k**: colorless oil, isolated yield 97%.  $R_f$  0.45 (1:1 hexane/EtOAc);  $^1H$  NMR (400 MHz,  $CDCl_3$ ):  $\delta$  = 7.75 (d,  $J$  = 8.4 Hz, 1H), 7.45 (t,  $J$  = 8.4 Hz, 1H), 7.04 (q,  $J$  = 8.0 Hz, 1H), 6.94-6.84 (m, 3H), 6.34 (s, 1H), 5.67 (s, 1H), 4.53 (d,  $J$  = 2.0 Hz, 1H), 4.15 (s, 3H), 3.90 (s, 3H), 3.42 (s, 3H), 2.93 (dd,  $J$  = 4.4, 17.6 Hz, 1H), 2.73 (d,  $J$  = 17.2 Hz, 1H);  $^{13}C$  NMR (100 MHz,  $CDCl_3$ )  $\delta$  = 175.4, 156.2, 153.2, 151.4 ( $J$  = 13.3, 137.0 Hz), 149.4, 149.0 ( $J$  = 13.2, 138.0 Hz), 132.5, 130.9, 127.1, 126.0, 124.4, 124.1 ( $J$  = 4.6 Hz),

121.7, 119.4, 116.4 ( $J = 17.0$  Hz), 115.2, 107.4, 72.4, 72.2, 68.6, 64.7, 61.7, 56.2, 38.3 ppm; HRMS (ESI)  $m/z$   $[M + H]^+$  calcd for  $C_{24}H_{21}F_2O_6$  443.1306, found 443.1309.

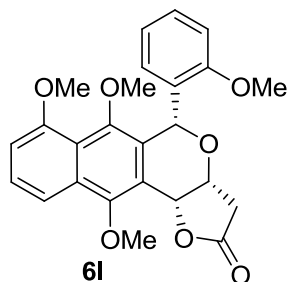

**Compound 6l:** colorless solid, isolated yield 86%.  $R_f$  0.40 (1:1 hexane/EtOAc);  $^1H$  NMR (400 MHz,  $CDCl_3$ ):  $\delta = 7.76$  (dd,  $J = 0.8, 8.4$  Hz, 1H), 7.45 (t,  $J = 8.4$  Hz, 1H), 7.27-7.26 (m, 1H), 6.98 (d,  $J = 8.4$  Hz, 1H), 6.90 (d,  $J = 7.6$  Hz, 1H), 6.90-6.87 (m, 1H), 6.73-6.70 (m, 1H), 6.41 (m, 1H), 5.65 (d,  $J = 3.5$  Hz, 1H), 4.45 (s, 1H), 4.13 (s, 3H), 3.98 (br s, 3H), 3.94 (s, 3H), 3.51 (s, 3H), 2.84 (dd,  $J = 5.2, 17.6$  Hz, 1H), 2.67 (d,  $J = 17.6$  Hz, 1H);  $^{13}C$  NMR (100 MHz,  $CDCl_3$ )  $\delta = 175.5, 158.1, 156.3, 152.8, 148.4, 130.6, 130.0, 129.8, 129.7, 127.7, 126.6, 126.0, 121.6, 120.1, 119.6, 115.3, 111.6, 107.0, 72.4, 67.4, 66.9, 64.2, 62.1, 56.2, 37.6$  ppm; HRMS (ESI)  $m/z$   $[M + H]^+$  calcd for  $C_{25}H_{25}O_7$  437.1600, found 437.1579.

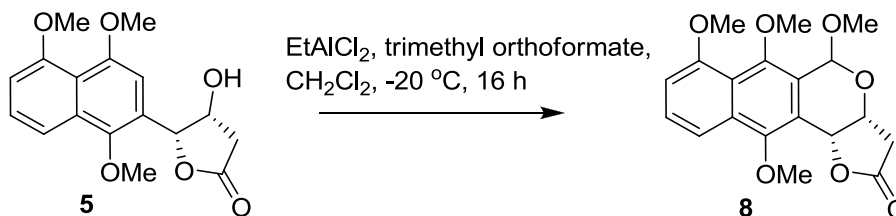

**(3aR,11bR)-5,6,7,11-Tetramethoxy-3,3a,5,11b-tetrahydro-2H-benzo[g]furo[3,2-c]isochromen-2-one (8).**

To a solution of **5** (640 mg, 2 mmol) and trimethyl orthoformate (260  $\mu$ L, 2.4 mmol) in anhydrous  $CH_2Cl_2$  (20 mL) at  $-20$  °C with stirring, EtAlCl<sub>2</sub> (2.0 mL, 1 M in hexane, 2.0 mmol) was added in a dropwise fashion. The reaction mixture was stirred overnight at  $-20$  °C, subsequently quenched by the addition of 1 N potassium sodium tartrate solution (20 mL) and the reaction allowed to warm to room temp. The corresponding aqueous layer was extracted with  $CH_2Cl_2$  (20 mL x 2) and the combined organic layers were washed with brine, dried over  $Na_2SO_4$  and concentrated. The residue was purified via silica column chromatography with 2:1 hexane/EtOAc to afford the desired product **8** as a colorless solid (470 mg, 1.3 mmol, 65% yield).  $R_f$  0.50 (2:3 hexane/EtOAc);  $^1H$  NMR (400 MHz,  $CDCl_3$ ):  $\delta = 7.71$  (dd,  $J = 0.8, 8.4$  Hz, 1H), 7.45 (t,  $J = 8.4$  Hz, 1H), 6.93 (dd,  $J = 0.4, 8.0$  Hz, 1H), 5.90 (s, 1H), 5.57 (d,  $J = 3.2$  Hz, 1H), 4.91 (dd,  $J = 2.8, 5.2$  Hz, 1H), 4.04 (s, 3H), 4.01 (s, 3H), 3.86 (s, 3H), 3.60 (s, 3H), 3.01 (dd,  $J = 5.2, 17.6$  Hz, 1H), 2.76 (d,  $J = 17.6$  Hz, 1H);  $^{13}C$  NMR (100 MHz,  $CDCl_3$ )  $\delta = 175.2, 156.6, 152.7, 150.3, 131.3, 127.2, 123.5, 121.6, 118.2, 115.4, 107.2, 95.0, 71.8, 65.8, 64.0, 63.3, 56.3, 55.9, 37.2$  ppm; HRMS (ESI)  $m/z$   $[M + H]^+$  calcd for  $C_{19}H_{21}O_7$  361.1287, found 361.1258.

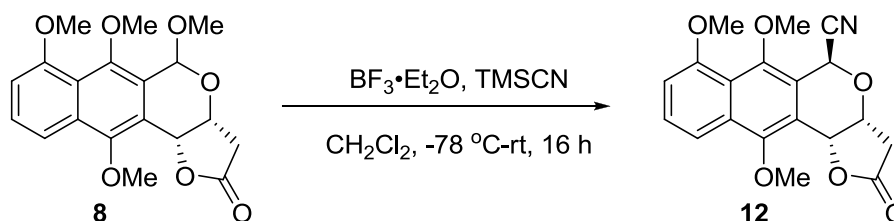

**(3aR,5S,11bR)-6,7,11-Trimethoxy-2-oxo-3,3a,5,11b-tetrahydro-2H-benzo[g]furo[3,2-c]isochromene-5-carbonitrile (12).** To a solution of **8** (72 mg, 0.2 mmol) and  $MeSi_3CN$  (76  $\mu$ L, 0.6 mmol) in anhydrous



CH<sub>2</sub>Cl<sub>2</sub> (4 mL) at -78 °C with stirring, BF<sub>3</sub>Et<sub>2</sub>O (76 uL, 0.6 mmol) was added in a dropwise fashion. The reaction mixture was stirred overnight and subsequently allowed to warm to room temp. The reaction was quenched with saturated aqueous NaHCO<sub>3</sub> solution (10 mL), extracted with Et<sub>2</sub>O (20 mL x 2) and the combined organics were washed with brine, dried over Na<sub>2</sub>SO<sub>4</sub>, filtered, and concentrated. The diastereoselectivity of the crude reaction was assessed via NMR and then purified on silica column chromatography using 3:1 hexane/EtOAc to afford the desired product **12** as a colorless solid (60 mg, 0.17 mmol, 85% yield). R<sub>f</sub> 0.60 (1:1 hexane/EtOAc); <sup>1</sup>H NMR (400 MHz, DMSO-d<sub>6</sub>): δ = 7.71 (d, *J* = 8.4 Hz, 1H), 7.61 (t, *J* = 8.4 Hz, 1H), 7.17 (dd, *J* = 7.6 Hz, 1H), 6.48 (s, 1H), 5.73 (d, *J* = 2.8 Hz, 1H), 4.84 (dd, *J* = 2.4, 4.8 Hz, 1H), 3.99 (s, 3H), 3.97 (s, 3H), 3.85 (s, 3H), 3.39-3.31 (m, 1H), 2.67 (d, *J* = 17.6 Hz, 1H); <sup>13</sup>C NMR (100 MHz, DMSO-d<sub>6</sub>) δ = 174.7, 155.9, 152.5, 148.8, 130.6, 128.3, 120.3, 118.4, 117.6, 117.3, 114.7, 108.2, 71.5, 70.3, 63.4, 62.5, 60.3, 56.2, 36.8 ppm; HRMS (ESI) *m/z* [M + H]<sup>+</sup> calcd for C<sub>19</sub>H<sub>18</sub>NO<sub>6</sub> 356.1117, found 356.1134.

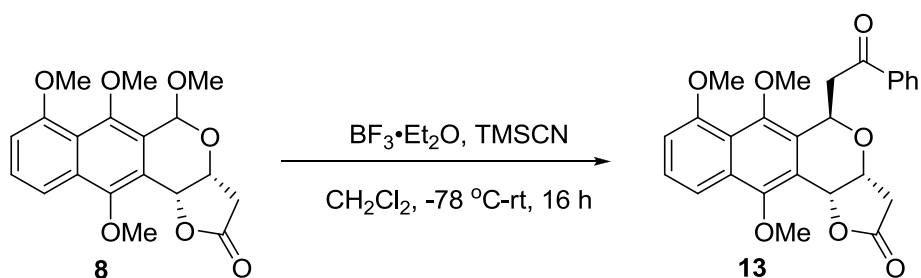

**(3aR,5R,11bR)-6,7,11-Trimethoxy-5-(2-oxo-2-phenylethyl)-3,3a,5,11b-tetrahydro-2H-benzo[g]furo[3,2-c]isochromen-2-one (13).** To a solution of **8** (72 mg, 0.2 mmol) and acetophenone (70 uL, 0.6 mmol) in anhydrous CH<sub>2</sub>Cl<sub>2</sub> (4 mL) at -78 °C with stirring, BF<sub>3</sub>Et<sub>2</sub>O (76 uL, 0.6 mmol) was added in a dropwise fashion. The reaction mixture was stirred overnight and subsequently allowed to warm to room temp. The reaction was quenched with saturated aqueous NaHCO<sub>3</sub> solution (10 mL), extracted with Et<sub>2</sub>O (20 mL x 2) and the combined organic layers were washed with brine, dried over Na<sub>2</sub>SO<sub>4</sub>, filtered, and concentrated. The diastereoselectivity of the crude reaction was assessed via NMR and then purified on silica column chromatography using 2:1 hexane/EtOAc to afford the desired product **13** as a colorless solid (86 mg, 0.17 mmol, 1:5 α/β mixture, 96% yield). R<sub>f</sub> 0.60 (1:1 hexane/EtOAc); <sup>1</sup>H NMR (400 MHz, CDCl<sub>3</sub>): δ = 8.10 (dd, *J* = 2.0, 8.4 Hz, 1H), 7.72-7.44 (m, 6H), 6.96 (d, *J* = 8.0 Hz, 1H), 5.82 (dd, *J* = 2.8, 10.8 Hz, 1H), 5.62 (d, *J* = 2.8 Hz, 1H), 4.06 (s, 3H), 4.05 (s, 3H), 3.94 (s, 3H), 3.78 (dd, *J* = 3.2, 12.0 Hz, 1H), 3.26 (dd, *J* = 11.2, 15.2 Hz, 1H), 2.94 (dd, *J* = 4.8, 17.6 Hz, 1H), 2.67 (d, *J* = 17.6 Hz, 1H); <sup>13</sup>C NMR (100 MHz, CDCl<sub>3</sub>) δ = 197.2, 175.1, 156.0, 153.3, 147.6, 136.1, 133.4, 130.4, 128.7 (2C), 128.4 (2C), 126.7, 126.2, 121.4, 118.4, 115.2, 107.1, 71.6, 68.9, 66.7, 64.1, 62.5, 56.1, 42.7, 37.6 ppm; HRMS (ESI) *m/z* [M + H]<sup>+</sup> calcd for C<sub>26</sub>H<sub>25</sub>O<sub>7</sub> 449.1600, found 449.1592.

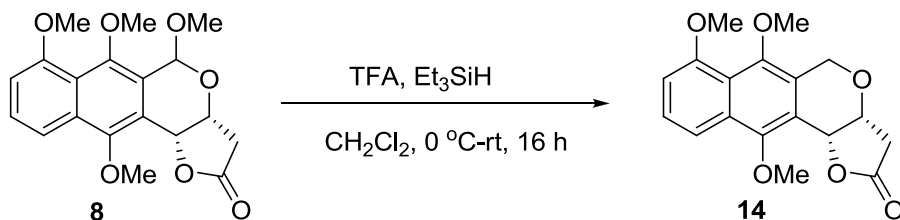

**(3aR,11bR)-6,7,11-Trimethoxy-3,3a,5,11b-tetrahydro-2H-benzo[g]furo[3,2-c]isochromen-2-one (14).** To a solution of **8** (72 mg, 0.2 mmol) and TFA (46 uL, 0.6 mmol) in anhydrous CH<sub>2</sub>Cl<sub>2</sub> (2 mL) at 0 °C with stirring, Et<sub>3</sub>SiH (96 uL, 0.6 mmol) was added in a dropwise fashion. The reaction mixture was stirred overnight, the reaction allowed to room temp and concentrated under vacuum. The concentrate was purified via silica column chromatography with 1:1 hexane/EtOAc to afford the desired product **14** as a

colorless solid (55 mg, 0.167 mmol, 83% yield).  $R_f$  0.50 (2:3 hexane/EtOAc);  $^1\text{H}$  NMR (400 MHz,  $\text{CDCl}_3$ ):  $\delta$  = 7.72 (dd,  $J$  = 0.8, 8.4 Hz, 1H), 7.43 (t,  $J$  = 8.4 Hz, 1H), 6.93 (d,  $J$  = 6.8 Hz, 1H), 5.57 (d,  $J$  = 2.8 Hz, 1H), 5.24 (d,  $J$  = 16.0 Hz, 1H), 4.70 (d,  $J$  = 16.0 Hz, 1H), 4.41 (dd,  $J$  = 2.0, 4.4 Hz, 1H), 4.07 (s, 3H), 4.01 (s, 3H), 3.80 (s, 3H), 2.97 (dd,  $J$  = 4.8, 17.6 Hz, 1H), 2.77 (d,  $J$  = 17.6 Hz, 1H);  $^{13}\text{C}$  NMR (100 MHz,  $\text{CDCl}_3$ )  $\delta$  = 175.2, 156.2, 153.3, 147.8, 130.3, 126.5, 124.4, 121.4, 119.0, 115.3, 107.2, 73.4, 72.5, 64.3, 63.4, 62.1, 56.2, 37.8 ppm; HRMS (ESI)  $m/z$   $[\text{M} + \text{H}]^+$  calcd for  $\text{C}_{18}\text{H}_{19}\text{NO}_6$  331.1182, found 331.1138.

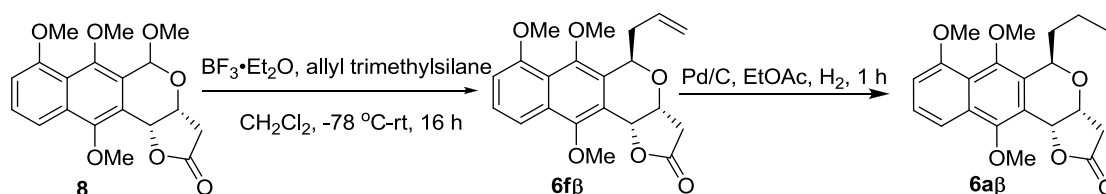

**(3aR,5R,11bR)-6,7,11-Trimethoxy-5-propyl-3,3a,5,11b-tetrahydro-2H-benzo[g]furo[3,2-c]isochromen-2-one (6aβ).**<sup>2</sup> To a solution of **8** (72 mg, 0.2 mmol) and allyl trimethylsilane (96  $\mu\text{L}$ , 0.6 mmol) in anhydrous  $\text{CH}_2\text{Cl}_2$  (4 mL) at  $-78$  °C with stirring,  $\text{BF}_3\text{Et}_2\text{O}$  (76  $\mu\text{L}$ , 0.6 mmol) was added in dropwise fashion. The reaction mixture was stirred overnight and allowed to warm to room temp. The reaction was quenched with saturated aqueous  $\text{NaHCO}_3$  solution (10 mL), extracted with  $\text{Et}_2\text{O}$  (20 mL x 2) and the combined organic layers were washed with brine, dried over  $\text{Na}_2\text{SO}_4$ , filtered, and concentrated. The residue was directly used in the next step without further purification.  $^1\text{H}$  NMR (400 MHz,  $\text{CDCl}_3$ ):  $\delta$  = 7.71 (d,  $J$  = 8.4 Hz, 1H), 7.45 (t,  $J$  = 8.0 Hz, 1H), 6.93 (d,  $J$  = 7.6 Hz, 1H), 5.99-5.93 (m, 1H), 5.58 (d,  $J$  = 2.8 Hz, 1H), 5.29 (s, 1H), 5.18-5.14 (m, 3H), 4.72 (dd,  $J$  = 2.8, 4.9 Hz, 1H), 4.06 (s, 3H), 4.02 (s, 3H), 3.86 (s, 3H), 2.96 (dd,  $J$  = 5.2, 17.6 Hz, 1H), 2.73-2.69 (m, 2H), 2.55-2.50 (m, 1H);  $^{13}\text{C}$  NMR (100 MHz,  $\text{CDCl}_3$ )  $\delta$  = 175.3, 156.0, 153.1, 147.6, 134.9, 130.2, 127.2, 126.5, 121.5, 118.5, 117.0, 115.2, 107.0, 71.9, 71.4, 66.1, 63.9, 62.5, 56.1, 37.7, 37.3 ppm.

The ethyl acetate (2 mL) solution of **6fβ** and Pd/C (10 mg) was placed in a capped flask under argon, fitted with a  $\text{H}_2$  balloon and the reaction vessel atmosphere exchanged with  $\text{H}_2$  (3x). The mixture was stirred to room temperature for 1 hr, filtered through celite, the filtrate evaporated and recovered concentrate purified via silica column chromatography using 3:1 hexane/EtOAc to afford the desired product as a colorless oil (72 mg, 0.19 mmol, 97% yield).  $R_f$  0.55 (1:1 hexane/EtOAc);  $^1\text{H}$  NMR (400 MHz,  $\text{CDCl}_3$ ):  $\delta$  = 7.69 (d,  $J$  = 7.6 Hz, 1H), 7.45 (t,  $J$  = 8.0 Hz, 1H), 6.95 (d,  $J$  = 3.2 Hz, 1H), 5.66 (s, 1H), 5.17 (d,  $J$  = 9.2 Hz, 1H), 4.72 (s, 1H), 4.05 (s, 3H), 4.01 (s, 3H), 3.89 (s, 3H), 3.07 (dd,  $J$  = 3.2, 17.2 Hz, 1H), 2.81 (d,  $J$  = 17.2 Hz, 1H), 1.81-1.74 (m, 2H), 1.58-1.55 (m, 2H), 1.00 (t,  $J$  = 6.4 Hz, 3H);  $^{13}\text{C}$  NMR (100 MHz,  $\text{CDCl}_3$ )  $\delta$  = 178.2, 156.0, 153.3, 147.2, 130.1, 128.3, 126.8, 121.6, 118.0, 115.3, 107.3, 73.45, 71.5, 66.0, 64.1, 62.7, 56.2, 38.1, 34.9, 19.6, 13.6 ppm; HRMS (ESI)  $m/z$   $[\text{M} + \text{H}]^+$  calcd for  $\text{C}_{21}\text{H}_{25}\text{O}_6$  373.1651, found 373.1638.

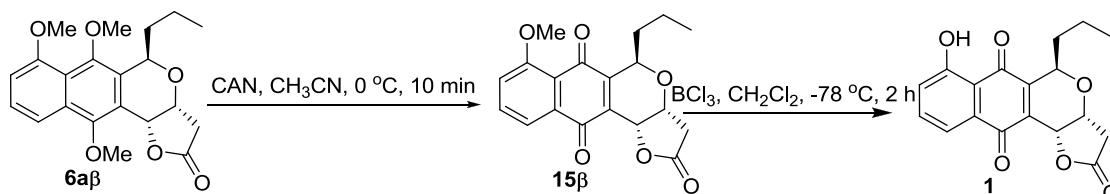

**(+)-Frenolicin B (2).** To a solution of **6aβ** (37 mg, 0.1 mmol) in a mixture of water (0.5 mL) and acetonitrile (1 mL) at  $0$  °C with stirring, a solution of cerium ammonium nitrate (126 mg, 0.2 mmol) in water (0.5 mL) was added in dropwise fashion. The reaction mixture was stirred for 10 min before the addition of water (5 mL). The mixture was extracted with EtOAc (10 mL x 2) and the combined organics washed with brine, dried over  $\text{Na}_2\text{SO}_4$ , filtered, and concentrated. The resulting residue was directly used in the

next step without further purification.

The ethyl acetate (2 mL) solution of **15 $\beta$**  (see also **Scheme 4**, main text) in CH<sub>2</sub>Cl<sub>2</sub> (3.5 mL) was cooled to -78 °C under argon. A solution of BCl<sub>3</sub> (0.4 mL, 0.4 mmol, 1 N in CH<sub>2</sub>Cl<sub>2</sub>) was added to the mixture and the reaction stirred for 2 hr at -78 °C. The reaction was quenched with saturated aqueous NH<sub>4</sub>Cl solution (1 mL), diluted with water (5 mL) and EtOAc (5 mL). The organic layer was washed with brine, dried over Na<sub>2</sub>SO<sub>4</sub>, filtered, and concentrated. The concentrate was purified via silica column chromatography using 3:1 hexane/EtOAc to afford the desired product as an orange solid (20 mg, 0.06 mmol, 60% yield). R<sub>f</sub> 0.15 (2:1 hexane/EtOAc). <sup>1</sup>H NMR (400 MHz, CDCl<sub>3</sub>):  $\delta$  = 11.85 (s, 1H), 7.71-7.65 (m, 2H), 7.30 (dd, *J* = 2.0, 8.0 Hz, 1H), 5.25 (d, *J* = 3.2 Hz, 1H), 4.92 (dd, *J* = 3.2, 10.0 Hz, 1H), 4.62 (dd, *J* = 2.8, 5.2 Hz, 1H), 2.95 (dd, *J* = 5.2, 17.6 Hz, 1H), 2.71 (d, *J* = 17.6 Hz, 1H), 1.71-1.65 (m, 4H), 1.03 (t, *J* = 7.2 Hz, 3H); <sup>13</sup>C NMR (100 MHz, CDCl<sub>3</sub>)  $\delta$  = 188.2, 181.6, 174.0, 162.0, 149.4, 137.3, 135.3, 131.6, 125.0, 119.9, 115.0, 69.8, 68.8, 66.4, 37.0, 33.9, 19.7, 13.7 ppm; HRMS (ESI) *m/z* [M + H]<sup>+</sup> calcd for C<sub>18</sub>H<sub>17</sub>O<sub>6</sub> 329.1025, found 329.1025.

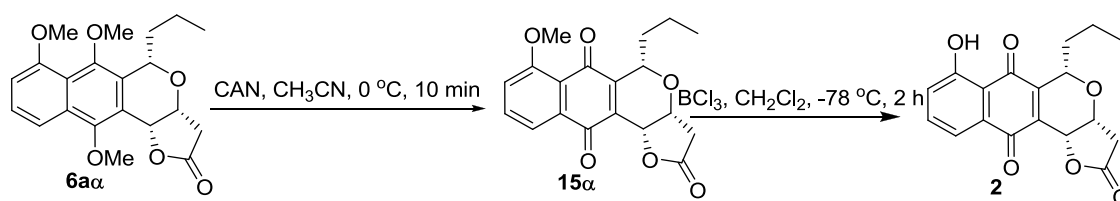

**(+)-*epi*-Frenolicin B (2)**. To a solution of **6a $\alpha$**  (37 mg, 0.1 mmol) in a mixture of water (0.5 mL) and acetonitrile (1 mL) at 0 °C with stirring, a solution of ceric ammonium nitrate (126 mg, 0.2 mmol) in water (0.5 mL) was added in a dropwise fashion. The reaction mixture was stirred for 10 min before the addition of water (5 mL). The mixture was extracted with EtOAc (10 mL x 2) and the combined organic layers were washed with brine, dried over Na<sub>2</sub>SO<sub>4</sub>, filtered, and concentrated. The concentrate was directly used in the next step without further purification.

The ethyl acetate (2 mL) solution of **15 $\alpha$**  (see also **Scheme 4**, main text) in CH<sub>2</sub>Cl<sub>2</sub> (3.5 mL) was cooled to -78 °C under argon. A solution of BCl<sub>3</sub> (0.4 mL, 0.4 mmol, 1 N in CH<sub>2</sub>Cl<sub>2</sub>) was added to the mixture and the reaction stirred for 2 hr at -78 °C. The reaction was quenched with saturated aqueous NH<sub>4</sub>Cl solution (1 mL), and the reaction was diluted with water (5 mL) and EtOAc (5 mL). The organic layer was washed with brine, dried over Na<sub>2</sub>SO<sub>4</sub>, filtered, and concentrated. The concentrate was purified on silica gel using 3:1 hexane/EtOAc to afford the desired product as an orange solid (19.5 mg, 0.06 mmol, 61% yield). R<sub>f</sub> 0.15 (2:1 hexane/EtOAc); <sup>1</sup>H NMR (400 MHz, CDCl<sub>3</sub>):  $\delta$  = 11.78 (s, 1H), 7.71-7.67 (m, 2H), 7.30 (dd, *J* = 2.0, 8.0 Hz, 1H), 5.27 (t, *J* = 2.0 Hz, 1H), 4.76 (m, 1H), 4.32 (dd, *J* = 2.4, 4.4 Hz, 1H), 2.89 (dd, *J* = 4.4, 17.6 Hz, 1H), 2.74 (d, *J* = 17.6 Hz, 1H), 2.10-2.04 (m, 1H), 1.96-1.90 (m, 1H), 1.48-1.42 (m, 1H), 1.35-1.27 (m, 1H), 0.91 (t, *J* = 7.2 Hz, 3H); <sup>13</sup>C NMR (100 MHz, CDCl<sub>3</sub>)  $\delta$  = 188.8, 181.5, 174.5, 161.9, 149.8, 137.2, 136.3, 131.6, 125.0, 119.8, 115.2, 72.0, 71.0, 69.9, 37.5, 36.2, 18.4, 14.1 ppm; HRMS (ESI) *m/z* [M + H]<sup>+</sup> calcd for C<sub>18</sub>H<sub>17</sub>O<sub>6</sub> 329.1025, found 329.1020.

### 3. Cancer cell line cytotoxicity

(+)-Frenolicin B (**1**) and *epi*-(+)-frenolicin B (**2**) synthesized in this study were tested for cytotoxicity against the human colorectal carcinoma cell line HCT116 and human non-small cell lung carcinoma cell line A549 (ATCC, Manassas, VA), respectively. The IC<sub>50</sub> values for each compound in the context of each cell line were determined by the Alamar Blue assay as previously described (see **Figure S1**).<sup>3</sup>

### 4. Literature cited

1. Jung, M. E.; Hagenah, J. A. *J. Org. Chem.* **1987**, *52*, 1889.
2. Fernandes, R. A.; Chavan, V. P.; Mulay, S. V.; Manchoju, A. *J. Org. Chem.* **2012**, *77*, 10455.
3. Wang, X.; Shaaban, K. A.; Elshahawi, S. I.; Ponomareva, L. V.; Sunkara, M.; Zhang, Y.; Copley, G. C.; Hower, J. C.; Kharel, M. K.; Thorson, J. T. *J. Nat. Prod.* **2013**, *76*, 1441.

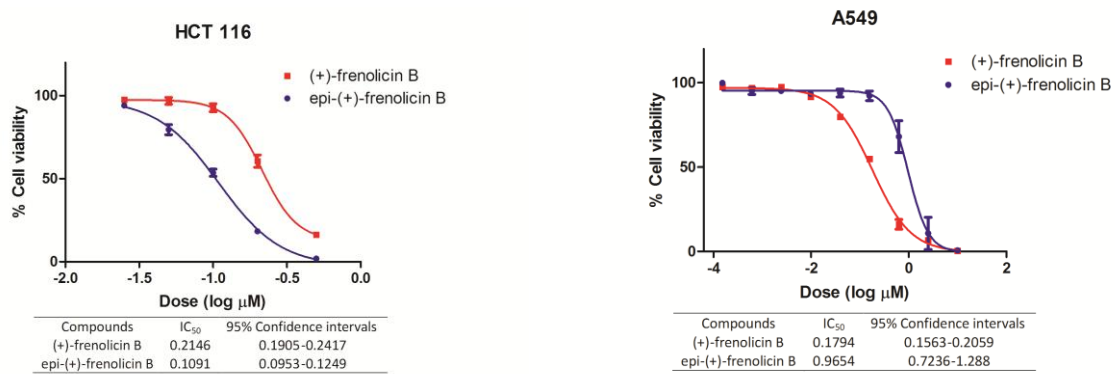

**Figure S1.** Cytotoxicity of (+)-frenolicin B (**1**) and *epi*-(+)-frenolicin B (**2**) against the human colorectal carcinoma cell line HCT116 (left panel) and human non-small cell lung carcinoma cell line A549 (right panel).

**Table S1. Lewis acid optimization of the oxa-Pictet-Spengler reaction.<sup>a</sup>**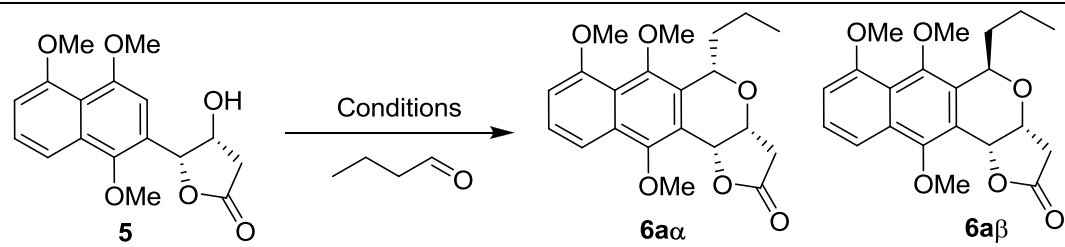

The reaction scheme shows the conversion of compound **5** (a naphthalene derivative with three methoxy groups and a hydroxyl group) to products **6α** and **6β** (oxa-Pictet-Spengler products) using an aldehyde under various conditions.

| Entry           | Lewis acids          | Solvents                        | Temp (°C) | Conversion (%) <sup>b</sup> | dr ( <b>6α</b> / <b>6β</b> ) <sup>c</sup> |
|-----------------|----------------------|---------------------------------|-----------|-----------------------------|-------------------------------------------|
| 1               | GdCl <sub>3</sub>    | CH <sub>2</sub> Cl <sub>2</sub> | 0-rt      | <5                          | -                                         |
| 2 <sup>d</sup>  | AlCl <sub>3</sub>    | CH <sub>2</sub> Cl <sub>2</sub> | -78-rt    | 30                          | 95:5                                      |
| 3               | EtAlCl <sub>2</sub>  | CH <sub>2</sub> Cl <sub>2</sub> | 0-rt      | 80                          | 85:15                                     |
| 4               | Et <sub>2</sub> AlCl | CH <sub>2</sub> Cl <sub>2</sub> | 0-rt      | 20                          | 60:40                                     |
| 5               | TMSOTf               | CH <sub>2</sub> Cl <sub>2</sub> | 0-rt      | 80                          | 68:32                                     |
| 6               | ZnCl <sub>2</sub>    | CH <sub>2</sub> Cl <sub>2</sub> | 0-rt      | 70                          | 55:45                                     |
| 7 <sup>e</sup>  | ZnI <sub>2</sub>     | CH <sub>2</sub> Cl <sub>2</sub> | 0-rt      | 60                          | 55:45                                     |
| 8               | CuBr <sub>2</sub>    | CH <sub>2</sub> Cl <sub>2</sub> | 0-rt      | 85                          | 91:9 <sup>f</sup>                         |
| 9               | Sc(OTf) <sub>3</sub> | CH <sub>2</sub> Cl <sub>2</sub> | 0-rt      | 85                          | 55:45                                     |
| 10 <sup>e</sup> | AgClO <sub>4</sub>   | CH <sub>2</sub> Cl <sub>2</sub> | 0-rt      | 50                          | 75:25                                     |
| 11              | InCl <sub>3</sub>    | CH <sub>2</sub> Cl <sub>2</sub> | 0-rt      | 75                          | 60:40                                     |
| 12              | HCl <sup>g</sup>     | CH <sub>2</sub> Cl <sub>2</sub> | 0-rt      | 30                          | 95:5                                      |
| 13              | Zn(OTf) <sub>2</sub> | CH <sub>2</sub> Cl <sub>2</sub> | 0-rt      | <5                          | -                                         |
| 14              | La(OTf) <sub>3</sub> | CH <sub>2</sub> Cl <sub>2</sub> | 0-rt      | <5                          | -                                         |

<sup>a</sup> Reaction were performed with 0.2 mmol **5**, 0.4 mmol aldehyde, and 50 mol% Lewis acid at 0 °C and allow the temp raise to room temp with 4 h stirring. <sup>b</sup> Conversion was determined by HPLC analysis. <sup>c</sup> dr ratio was determined by the proton NMR of crude products. <sup>d</sup> 2 h reaction time. <sup>e</sup> Overnight. <sup>f</sup> 10% side bromine substitution on the naphthalene ring was found. <sup>g</sup> 2N HCl in Et<sub>2</sub>O.

yz-a44

7.698  
7.677  
7.675  
7.463  
7.443  
7.423  
7.260  
— 6.908

3.966  
3.941  
3.924

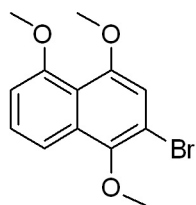

Scheme 1, compound 7

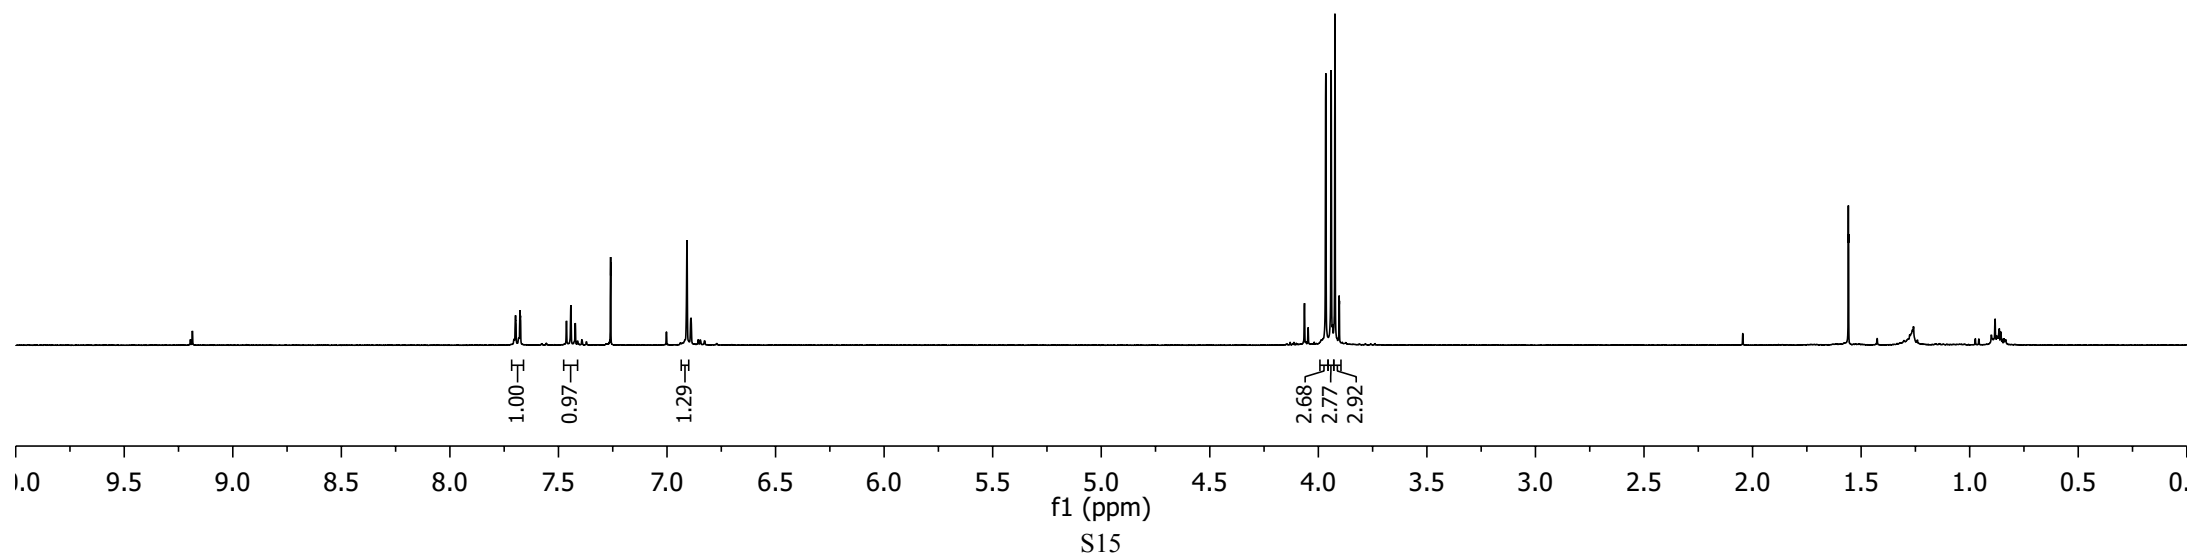

yz-a45-2

7.705  
7.703  
7.684  
7.681  
7.424  
7.404  
7.260  
6.927  
6.877  
6.858  
6.455  
6.437  
6.419  
6.415  
6.397  
6.379

3.970  
3.940  
3.926  
3.923  
3.845  
3.842  
3.378  
3.374  
3.360  
3.357

2.046  
1.991  
1.974  
1.957

0.965  
0.948

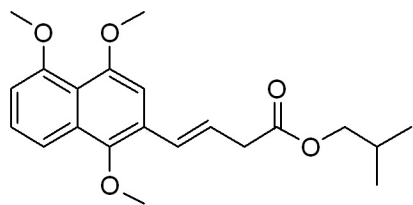

Scheme 1, compound 9

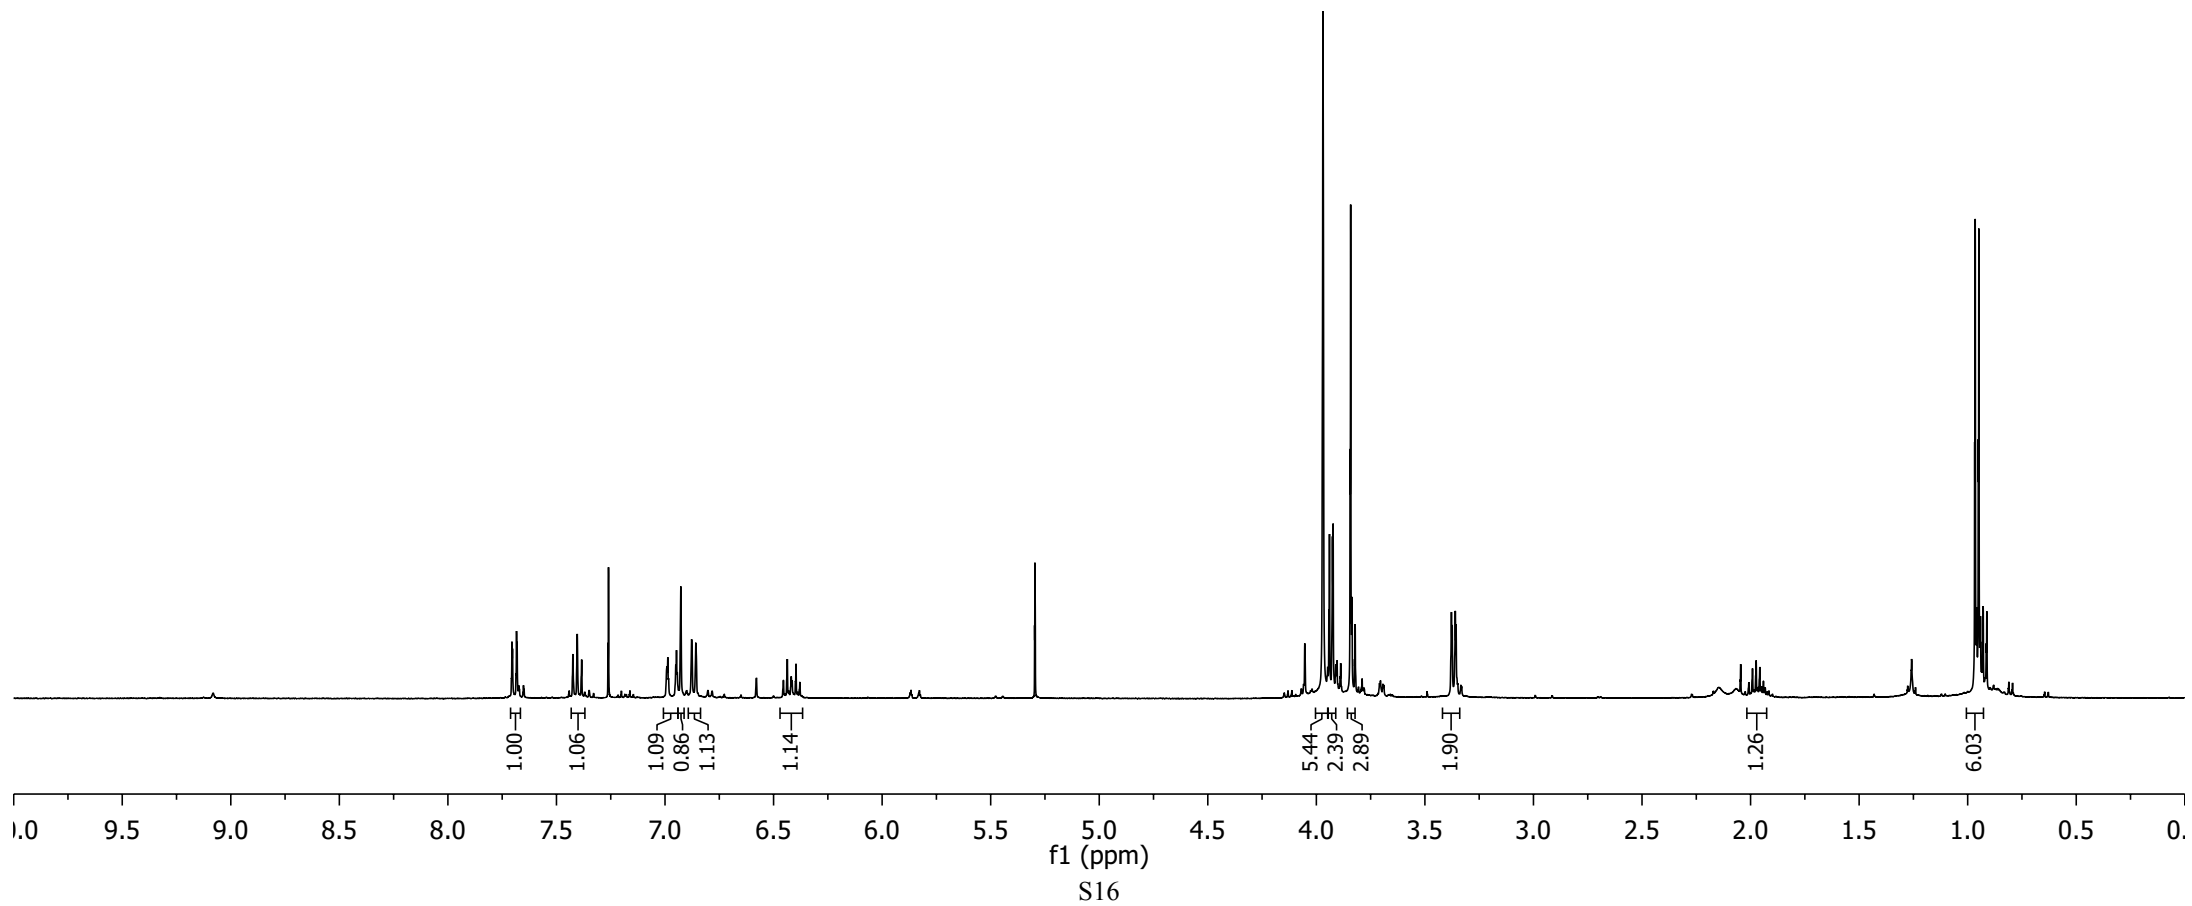



yz-a45-2

—171.925  
—157.462  
—153.648  
—147.230  
—131.787  
—127.774  
—127.058  
—125.432  
—123.275  
—118.281  
—115.196  
—107.091  
—103.408  
—77.478  
—77.160  
—76.843  
—71.088  
—62.402  
—57.012  
—56.641  
—38.967  
—27.880  
—19.227

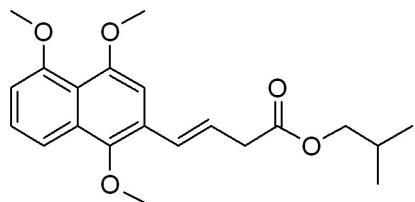

Scheme 1, compound 9

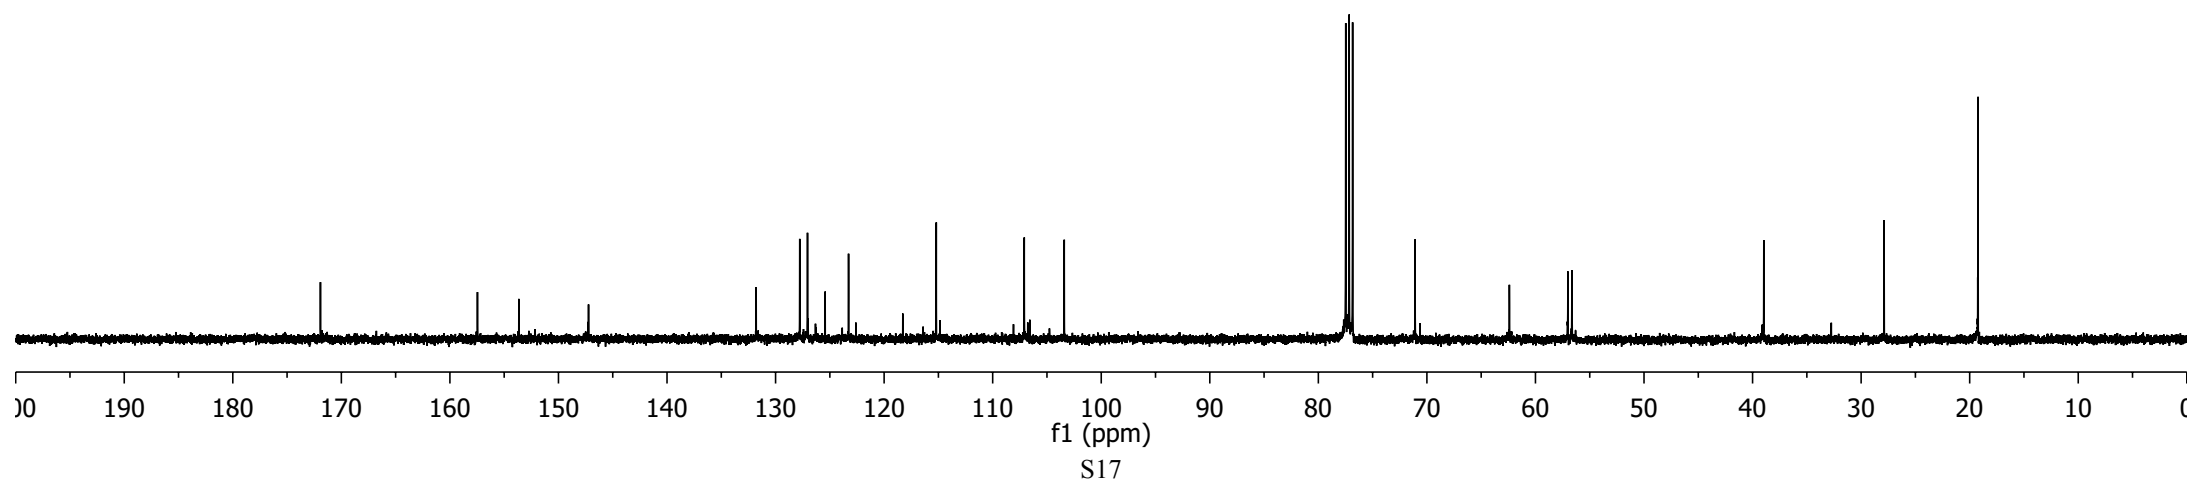

yz-a63

7.704  
7.702  
7.687  
7.685  
7.404  
7.403  
7.260  
6.928  
6.872  
6.858  
6.857  
6.422  
6.408  
6.404  
6.390  
6.376

3.976  
3.967  
3.842  
3.746  
3.375  
3.372  
3.361  
3.358

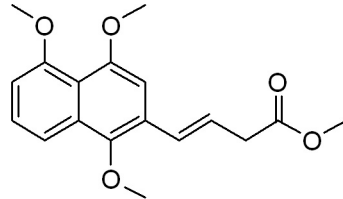

Scheme 1, compound 10

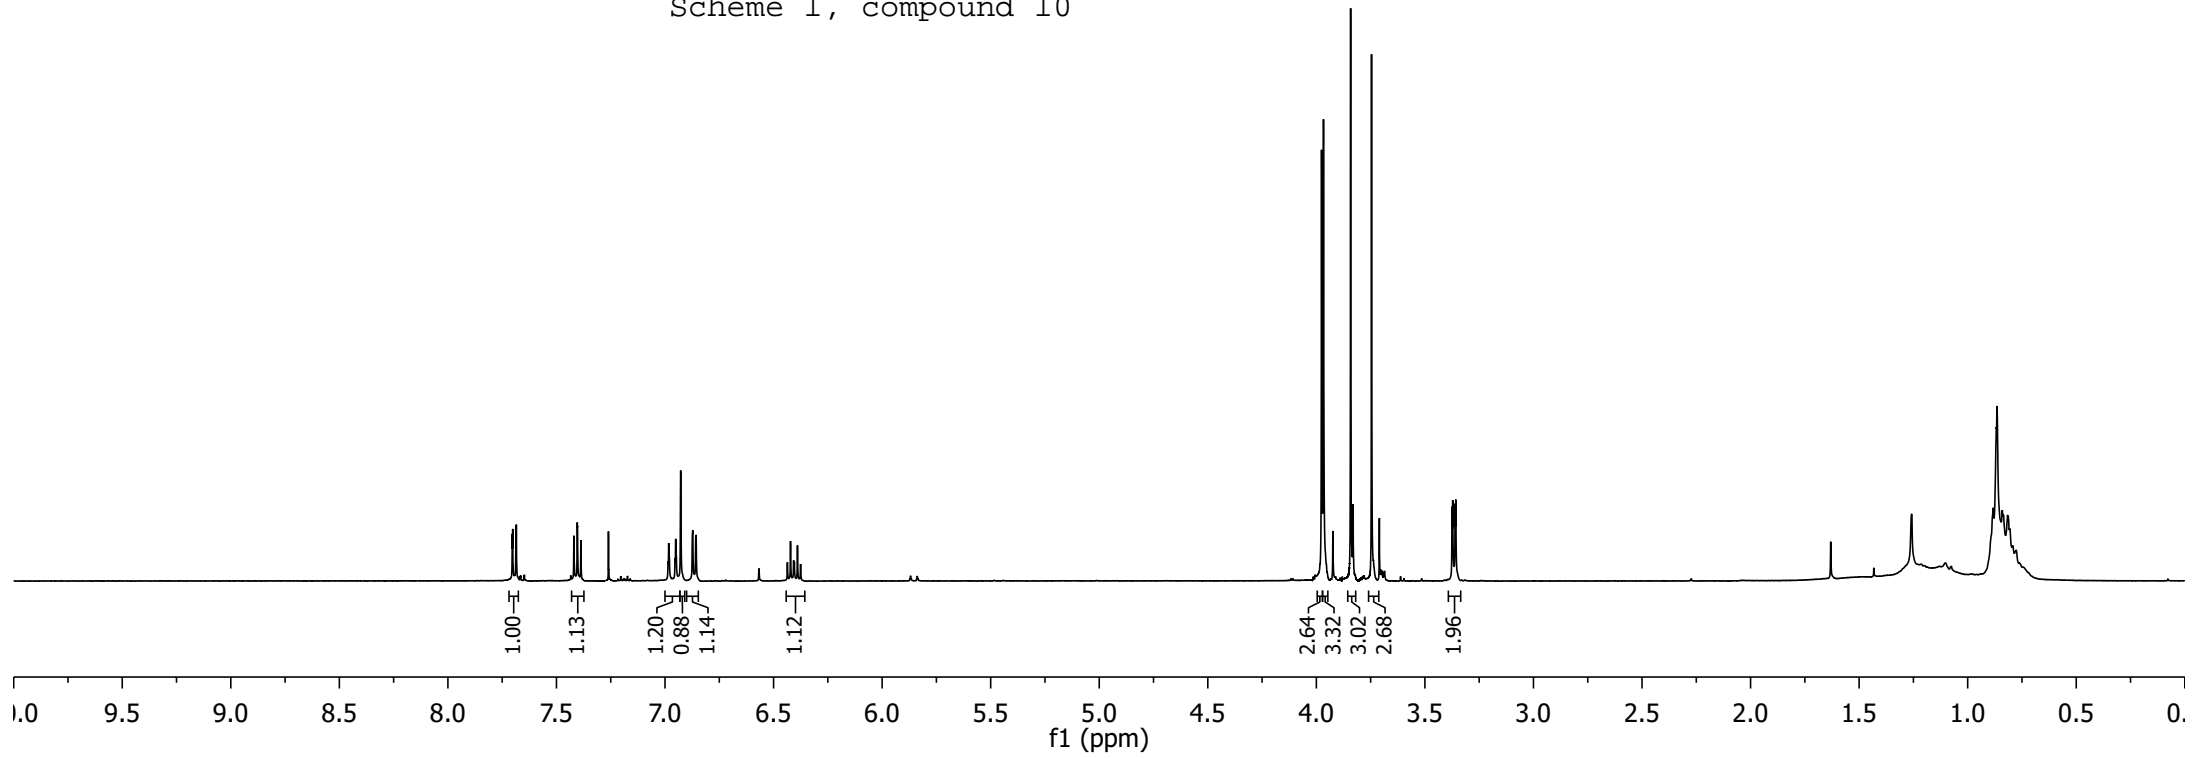

yz-a63

—172.235

—157.446

—153.652

—147.241

—131.767

—127.873

—127.055

—125.304

—122.935

—118.260

—115.185

—107.027

—103.237

—77.415

—77.160

—76.906

—62.440

—56.948

—56.620

—52.140

—38.746

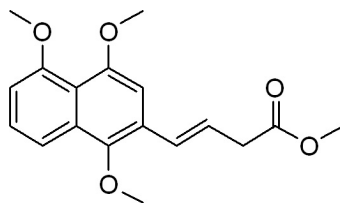

Scheme 1, compound 10

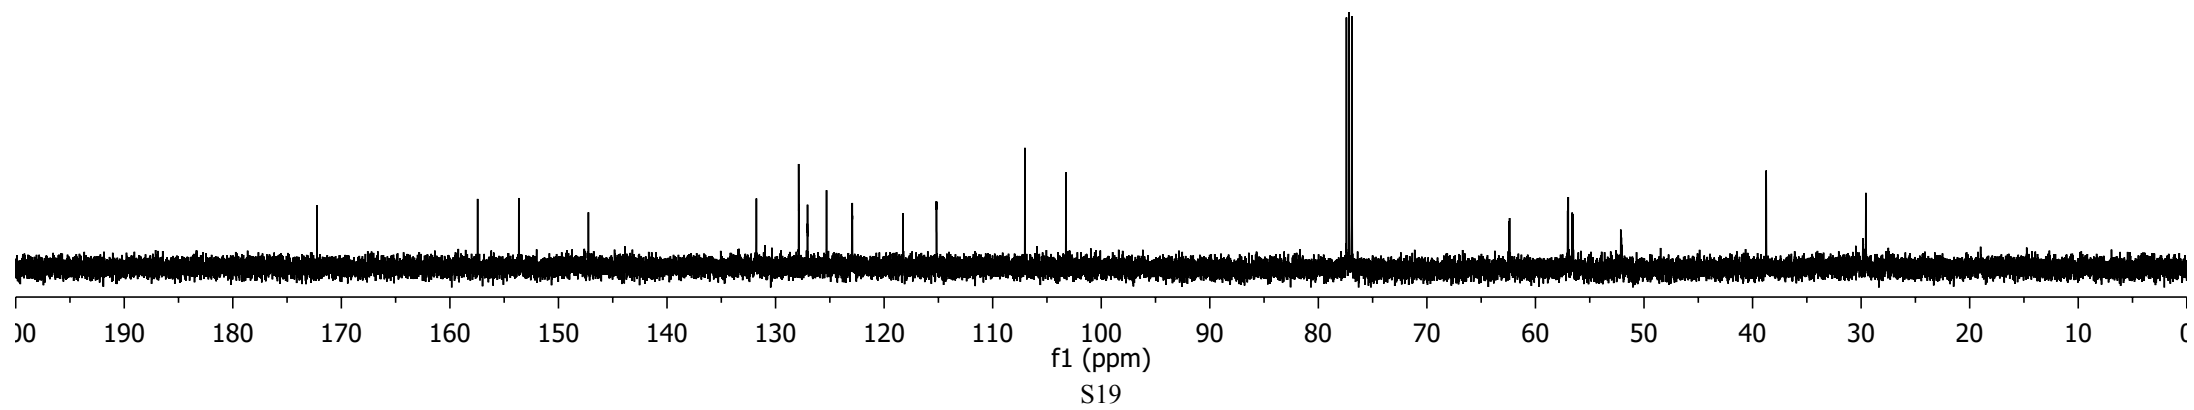

yz-a50-2

7.582  
7.580  
7.561  
7.435  
7.415  
7.394  
7.260  
6.877  
6.865  
5.845  
5.836  
4.835  
4.826  
4.823  
4.814  
3.944  
3.936  
3.870  
3.016  
2.955  
2.941  
2.910  
2.897  
2.746  
2.702

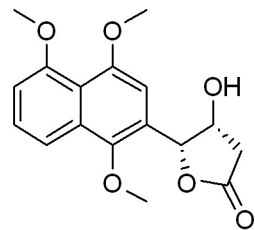

Scheme 1, compound 5

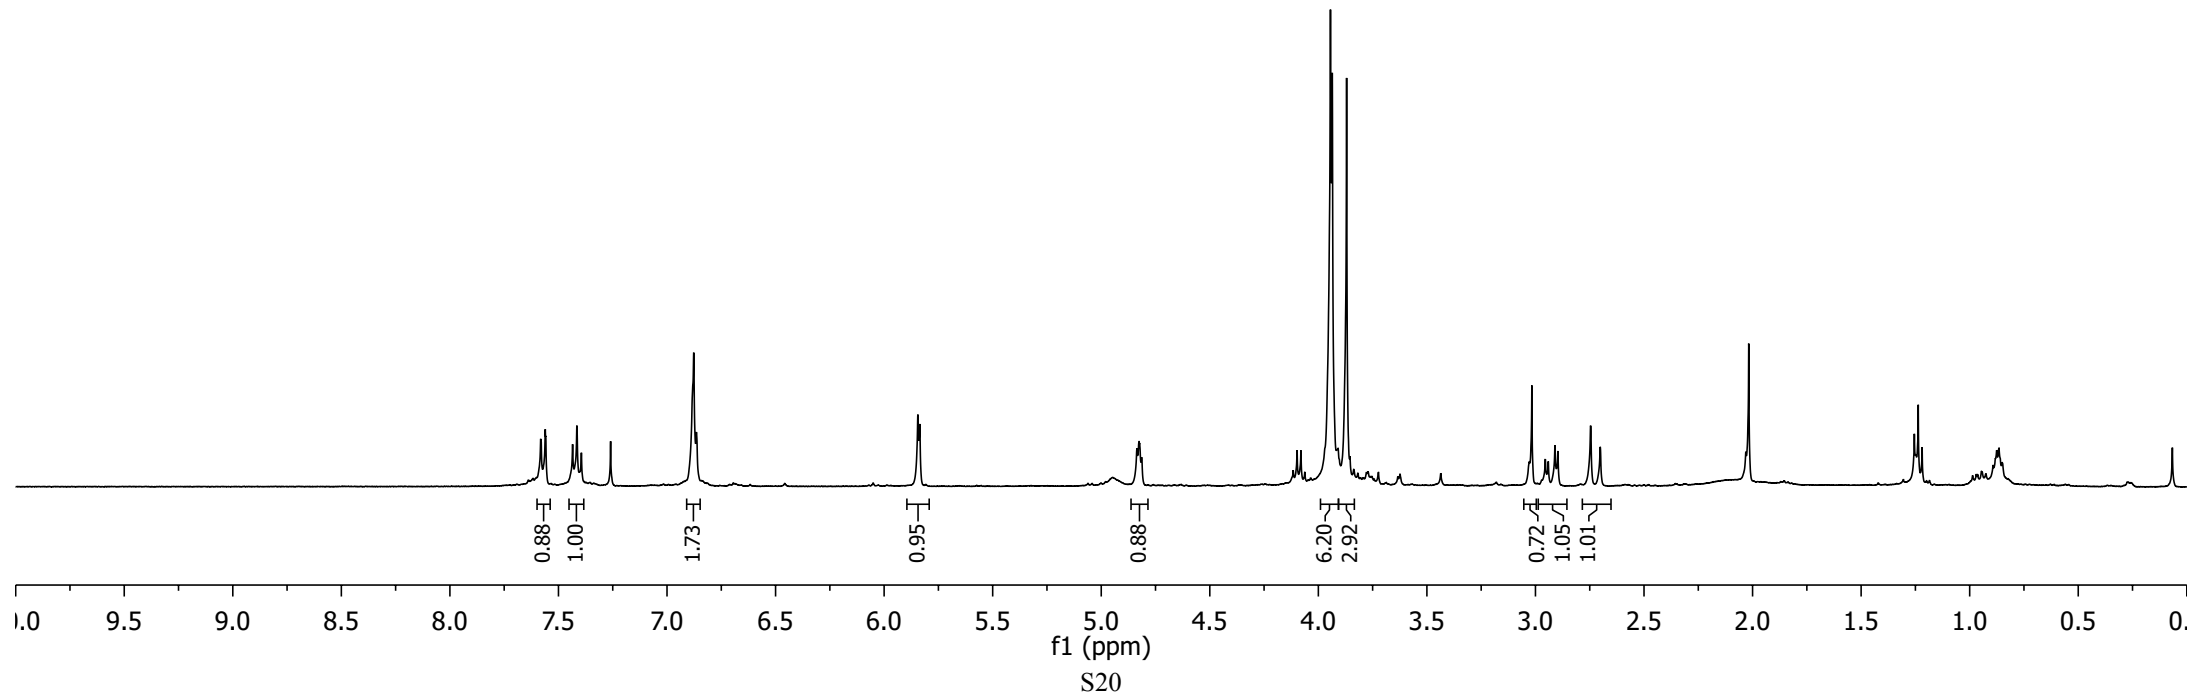

yz-a50-2

—175.774

—157.690

—154.104

—146.034

—130.850

—127.337

—122.522

—118.636

—114.484

—107.301

—104.064

—81.964

—77.478

—77.160

—76.842

—69.886

—62.090

—56.862

—56.646

—38.427

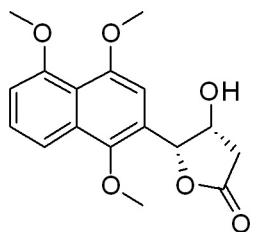

Scheme 1, compound 5

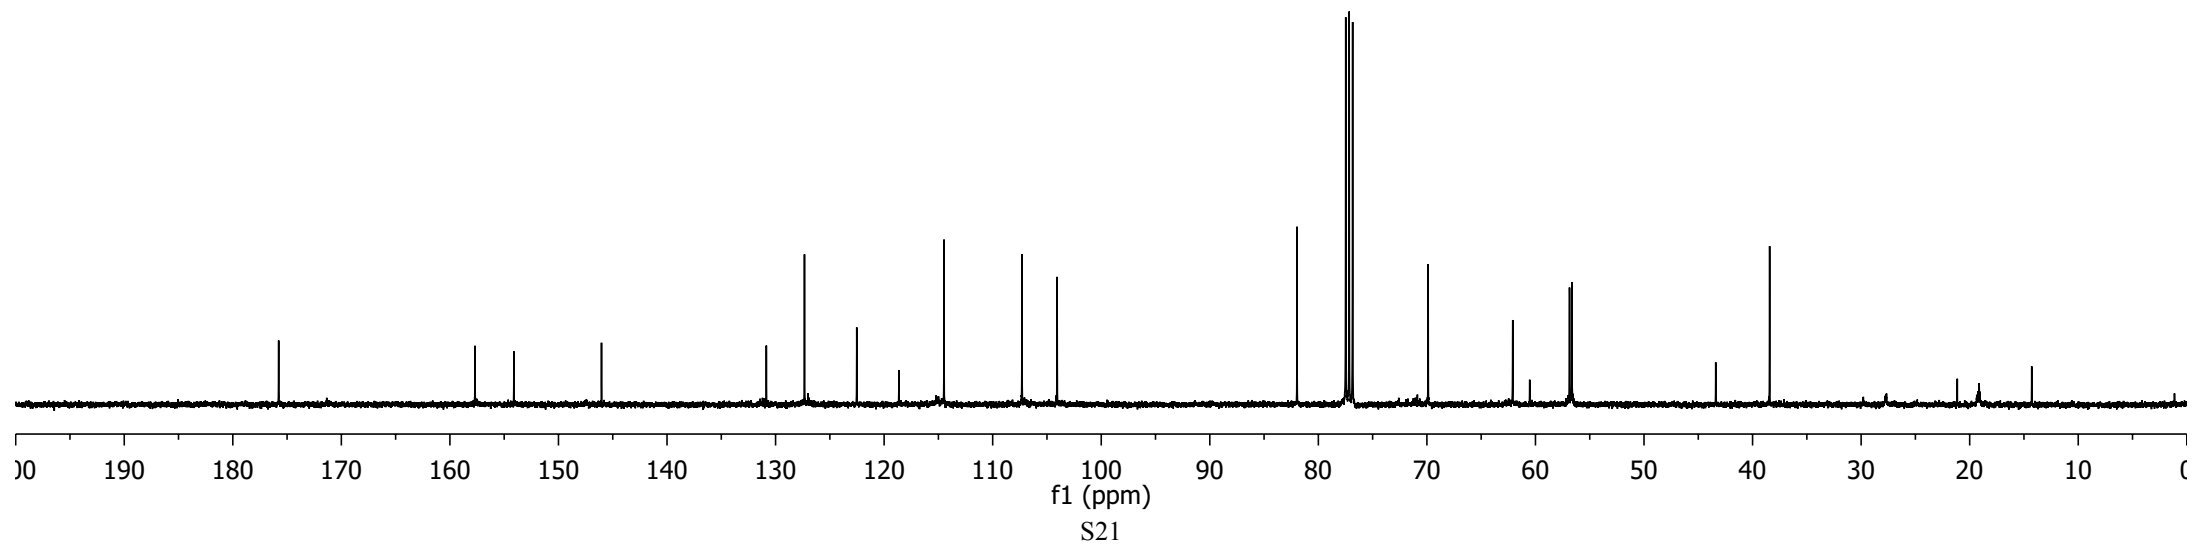

yz-b42

7.741  
7.739  
7.720  
7.718  
7.473  
7.453  
7.432  
7.260  
6.965  
6.946

5.648  
5.642

5.080  
5.073  
5.062  
5.055

4.393  
4.387  
4.382  
4.376  
4.089  
4.014  
3.769

2.988  
2.977  
2.944  
2.934  
2.850  
2.807

2.187  
2.138  
2.030  
1.970

1.431  
1.387  
1.308  
1.252

0.901  
0.883  
0.864

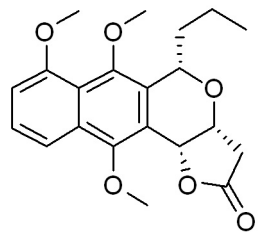

Scheme 2, compound 6aa

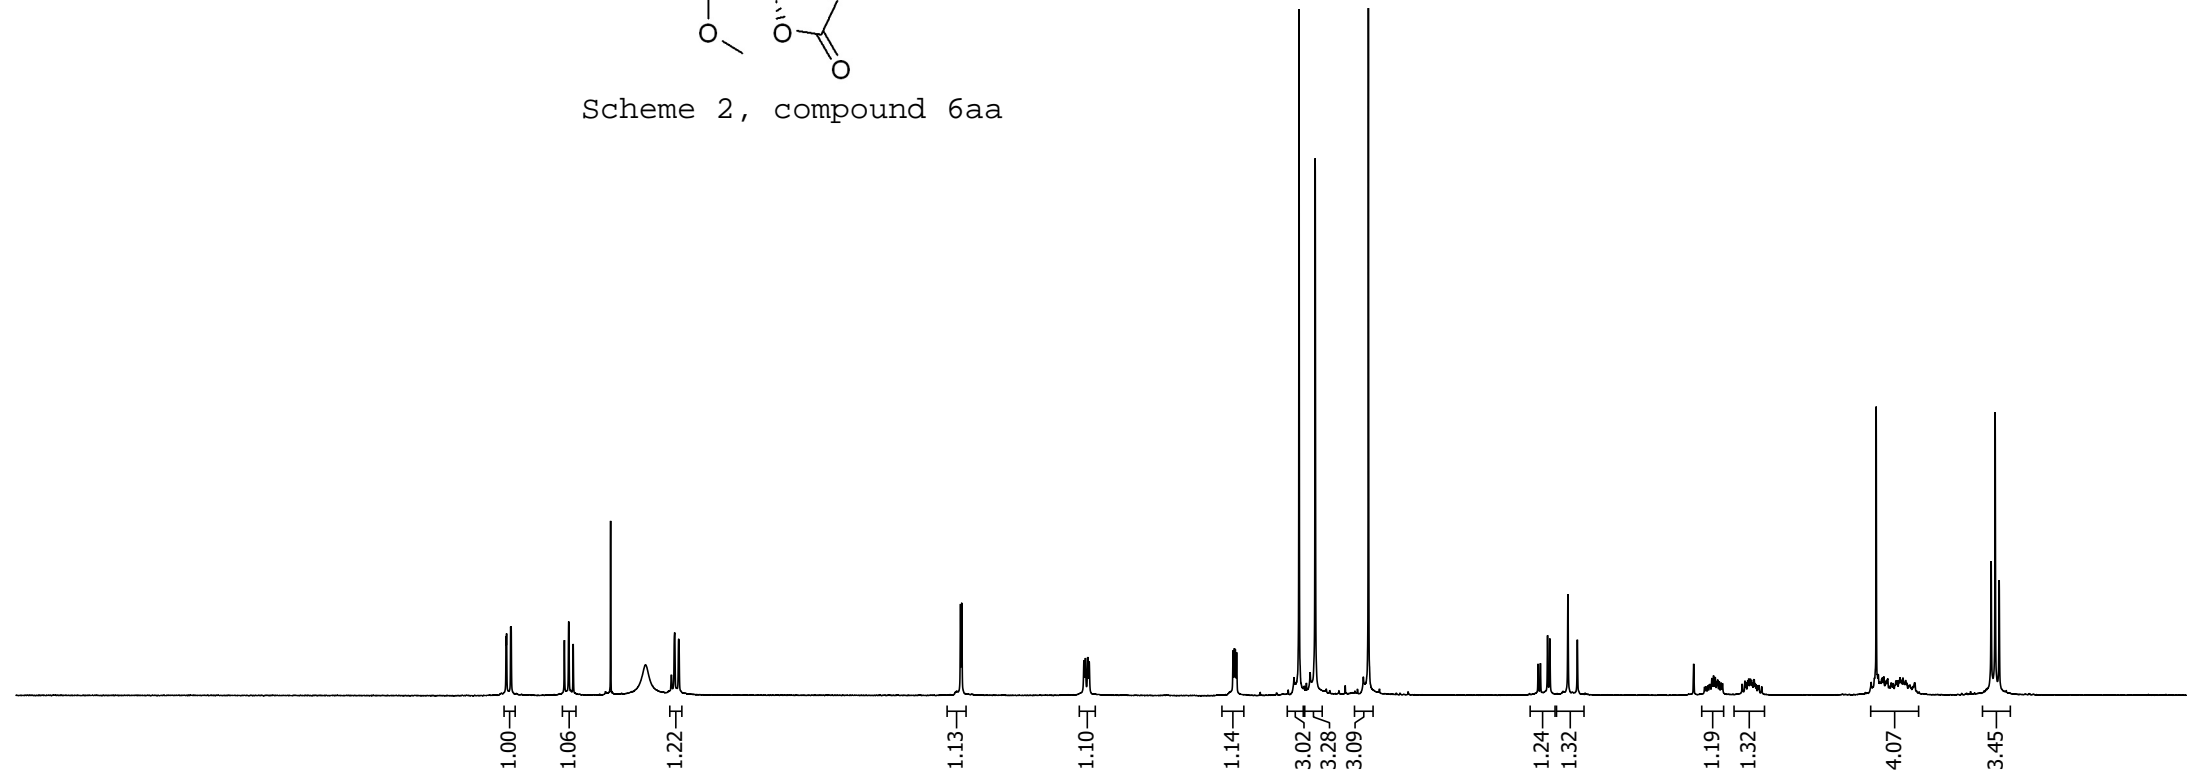

f1 (ppm)

S22

yz-b42

—177.709

~156.155  
~153.366  
~148.956

~130.253  
~128.134  
~126.844

~121.649  
~119.292  
~115.289

—107.538

~77.478  
~77.160  
~76.843  
~73.902  
~73.278  
~71.045

—64.709  
—61.817

—56.360

~38.860  
~37.712

—30.461

—18.425

—13.981

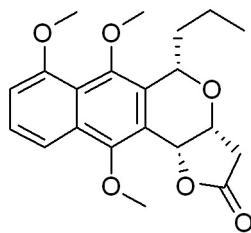

Scheme 2, compound 6aa

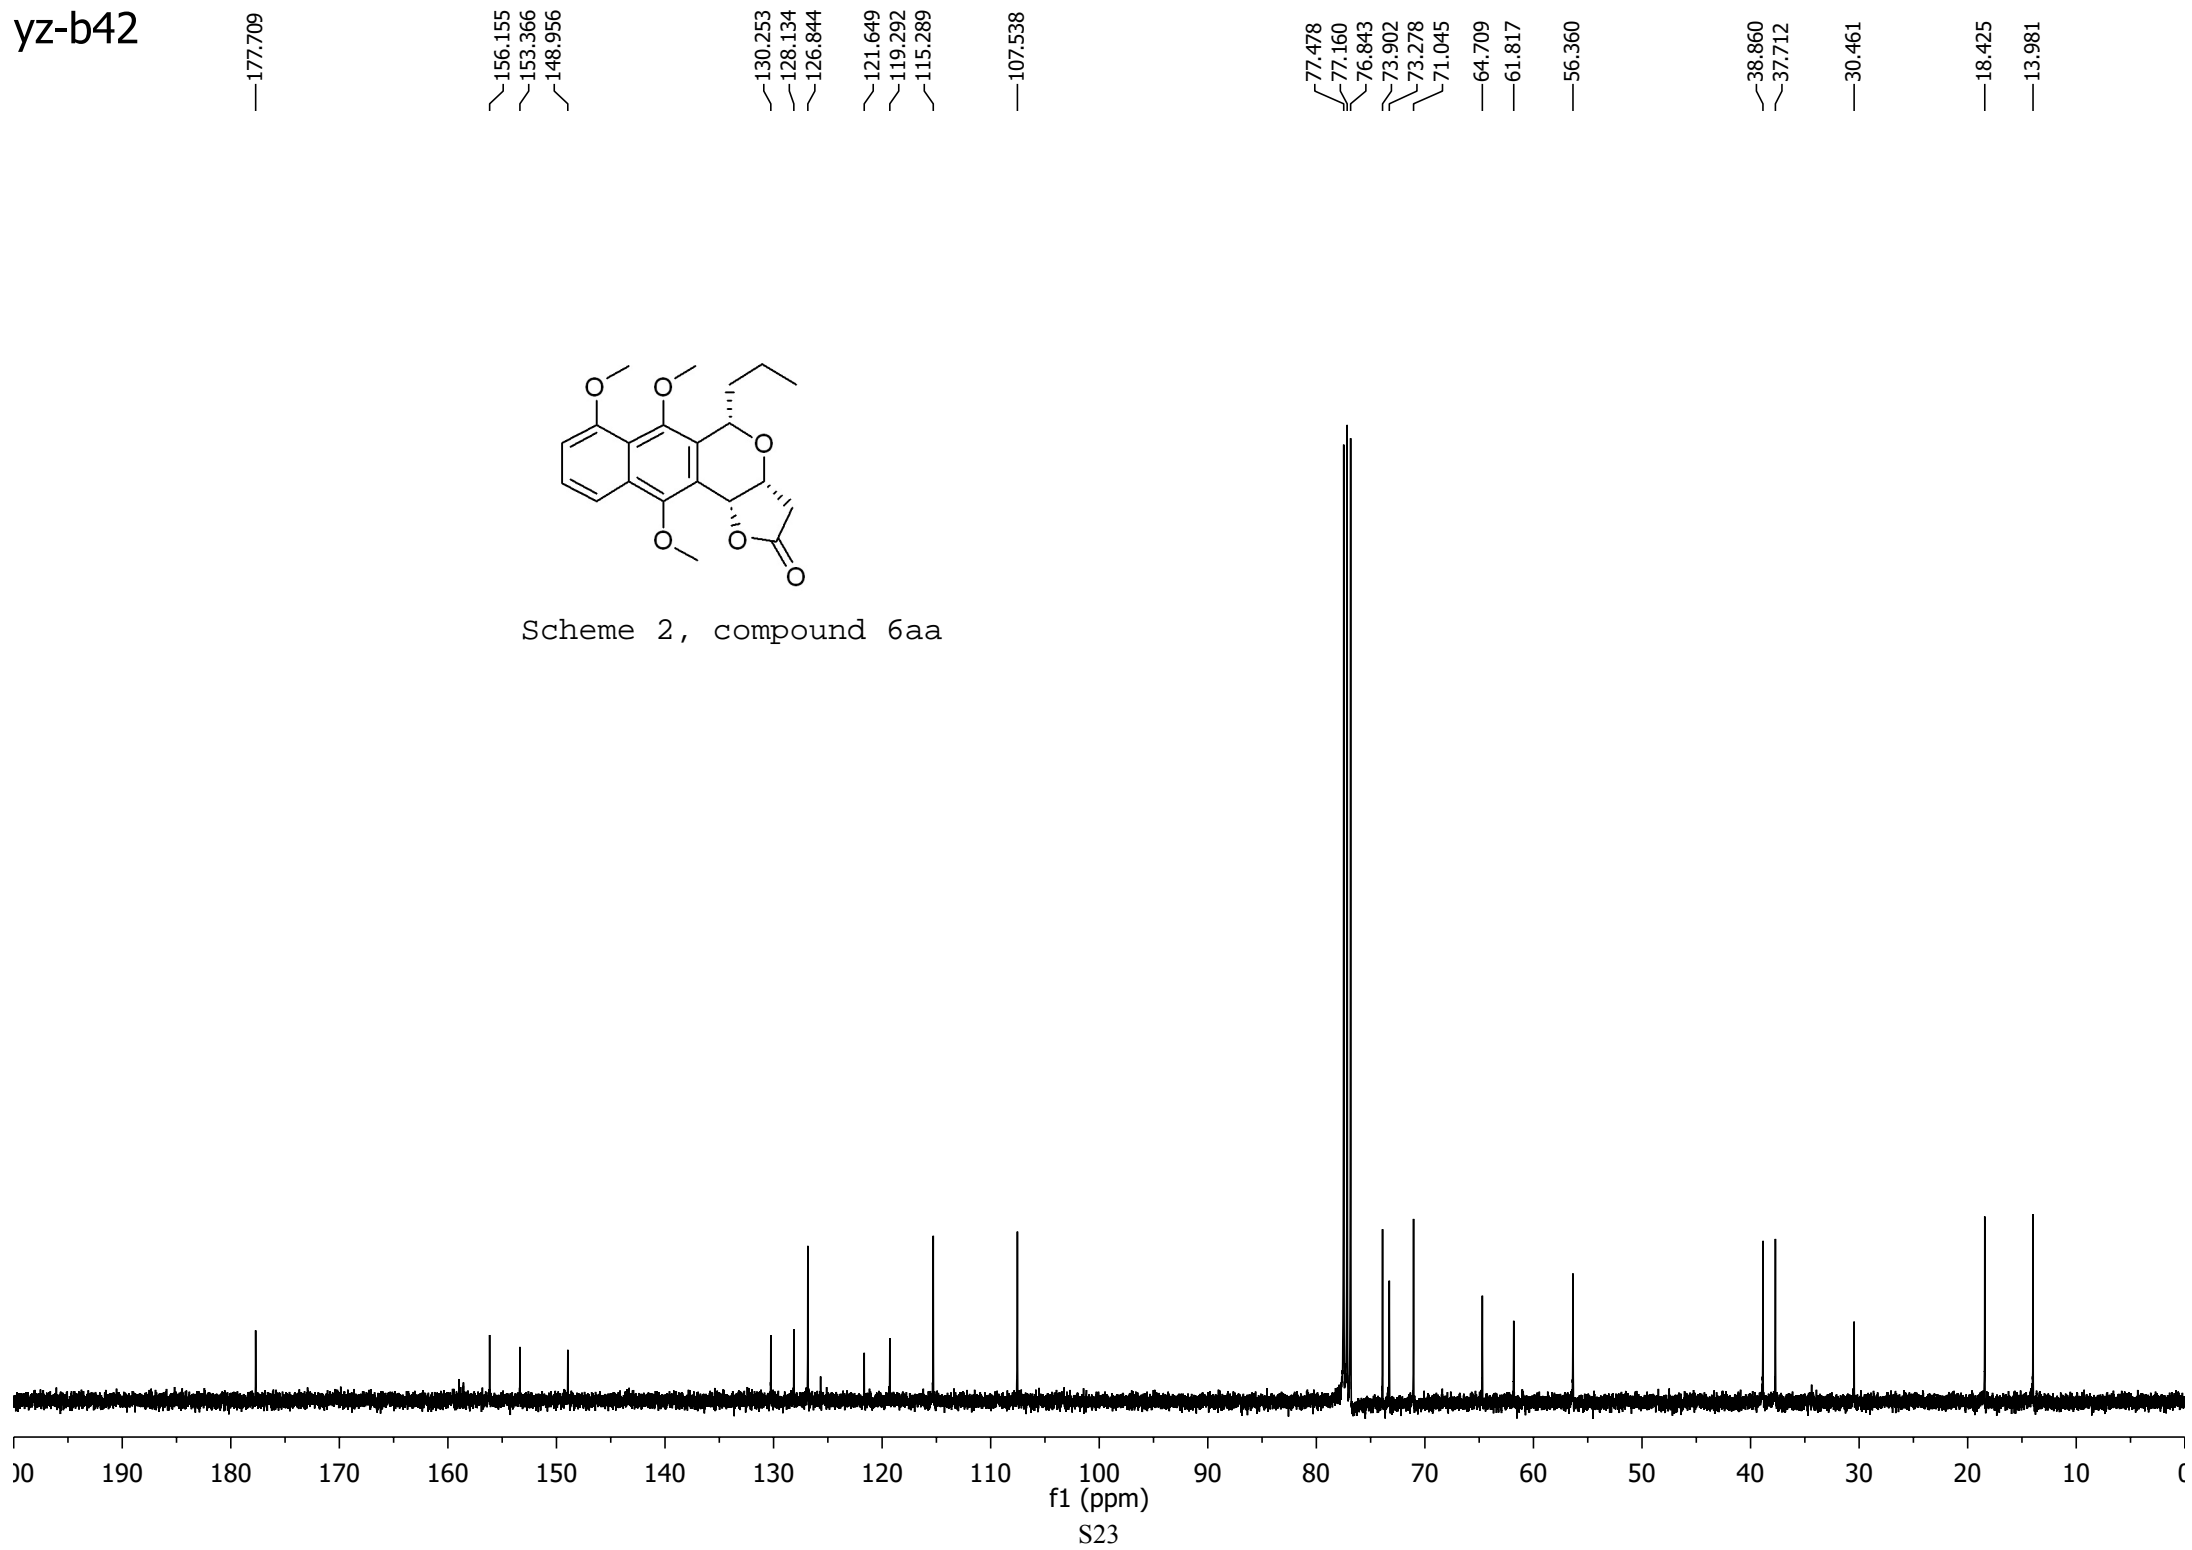

yz-b2

7.741  
7.720  
7.458  
7.438  
7.418  
7.260  
6.947  
6.928

5.590

5.051  
5.040  
5.031

4.358

4.091  
4.016

3.744

2.933  
2.922  
2.890  
2.880  
2.800  
2.757

2.208  
2.195  
2.180  
2.162

1.641

1.254  
1.098  
0.858  
0.848  
0.829  
0.810

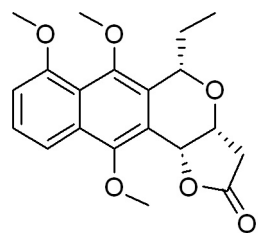

Scheme 2, compound 6b

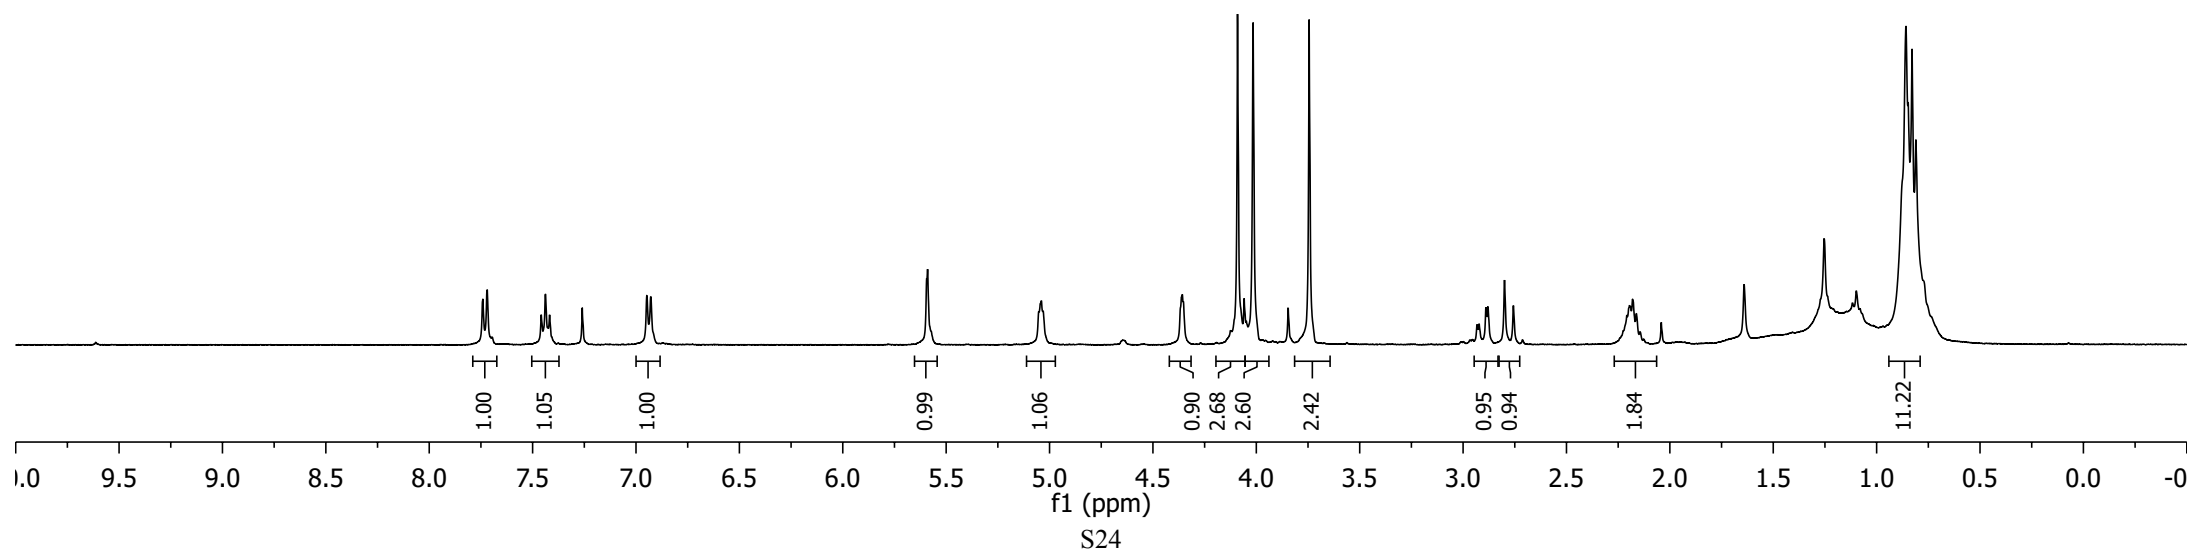



yz-b2

—176.058

~156.289  
~153.193  
~149.301

~130.310  
~127.637  
~126.656

~121.595  
~119.861  
~115.240

—107.306

~77.478  
~77.160  
~76.842  
~74.326  
~73.172  
~71.050

—64.652  
—61.749

—56.357

—38.646

~29.564  
~28.452

—9.465

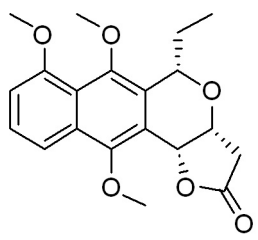

Scheme 2, compound 6b

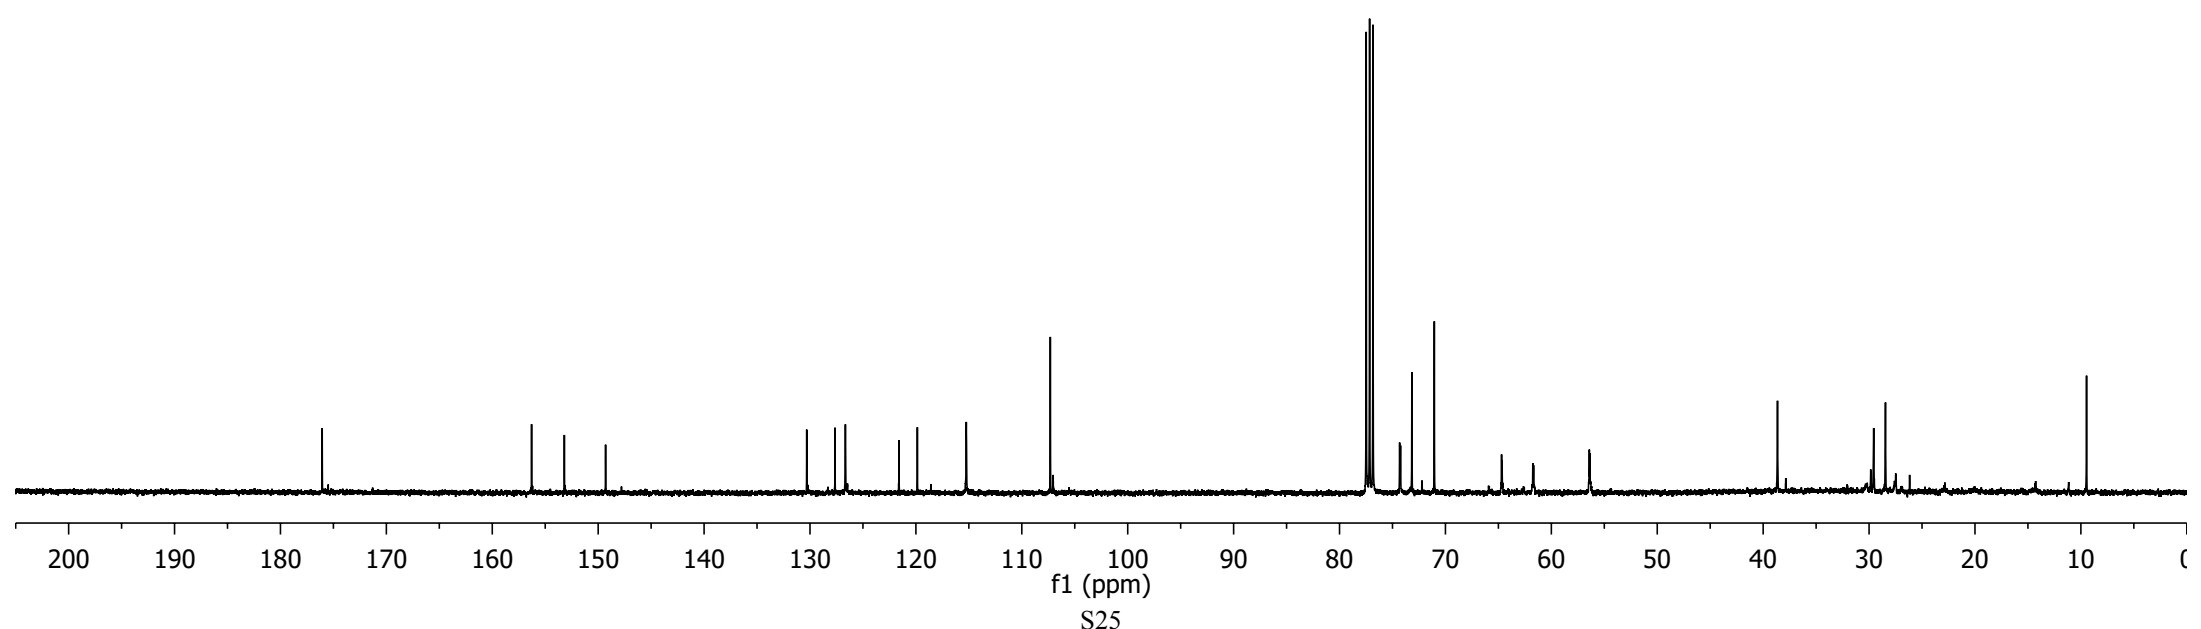

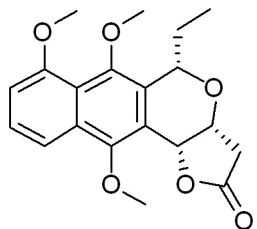

Scheme 2, compound 6b

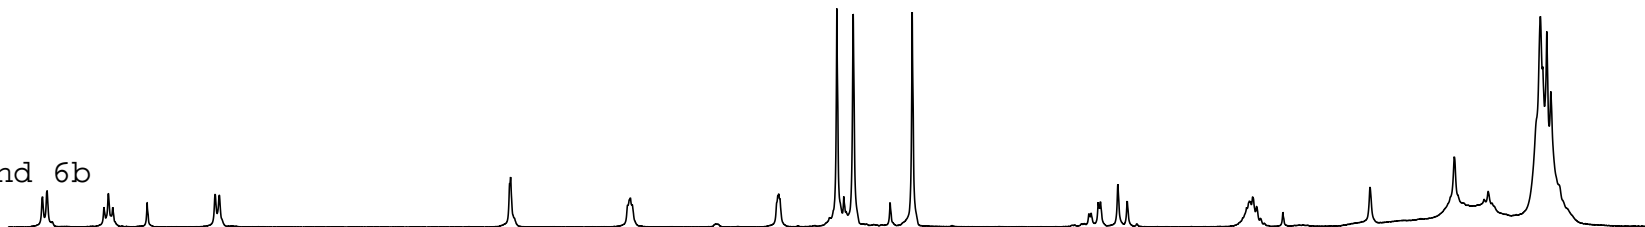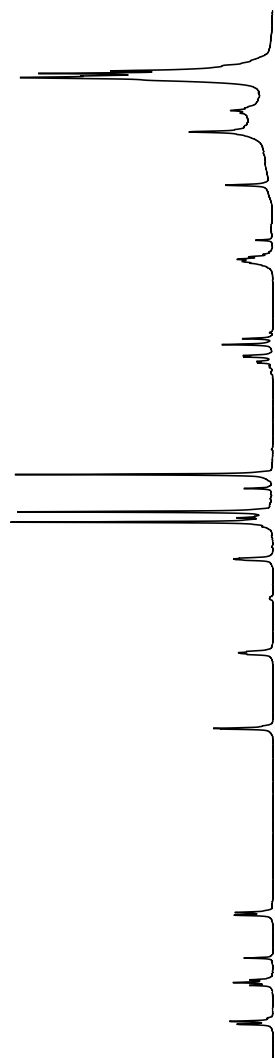

yz-b2

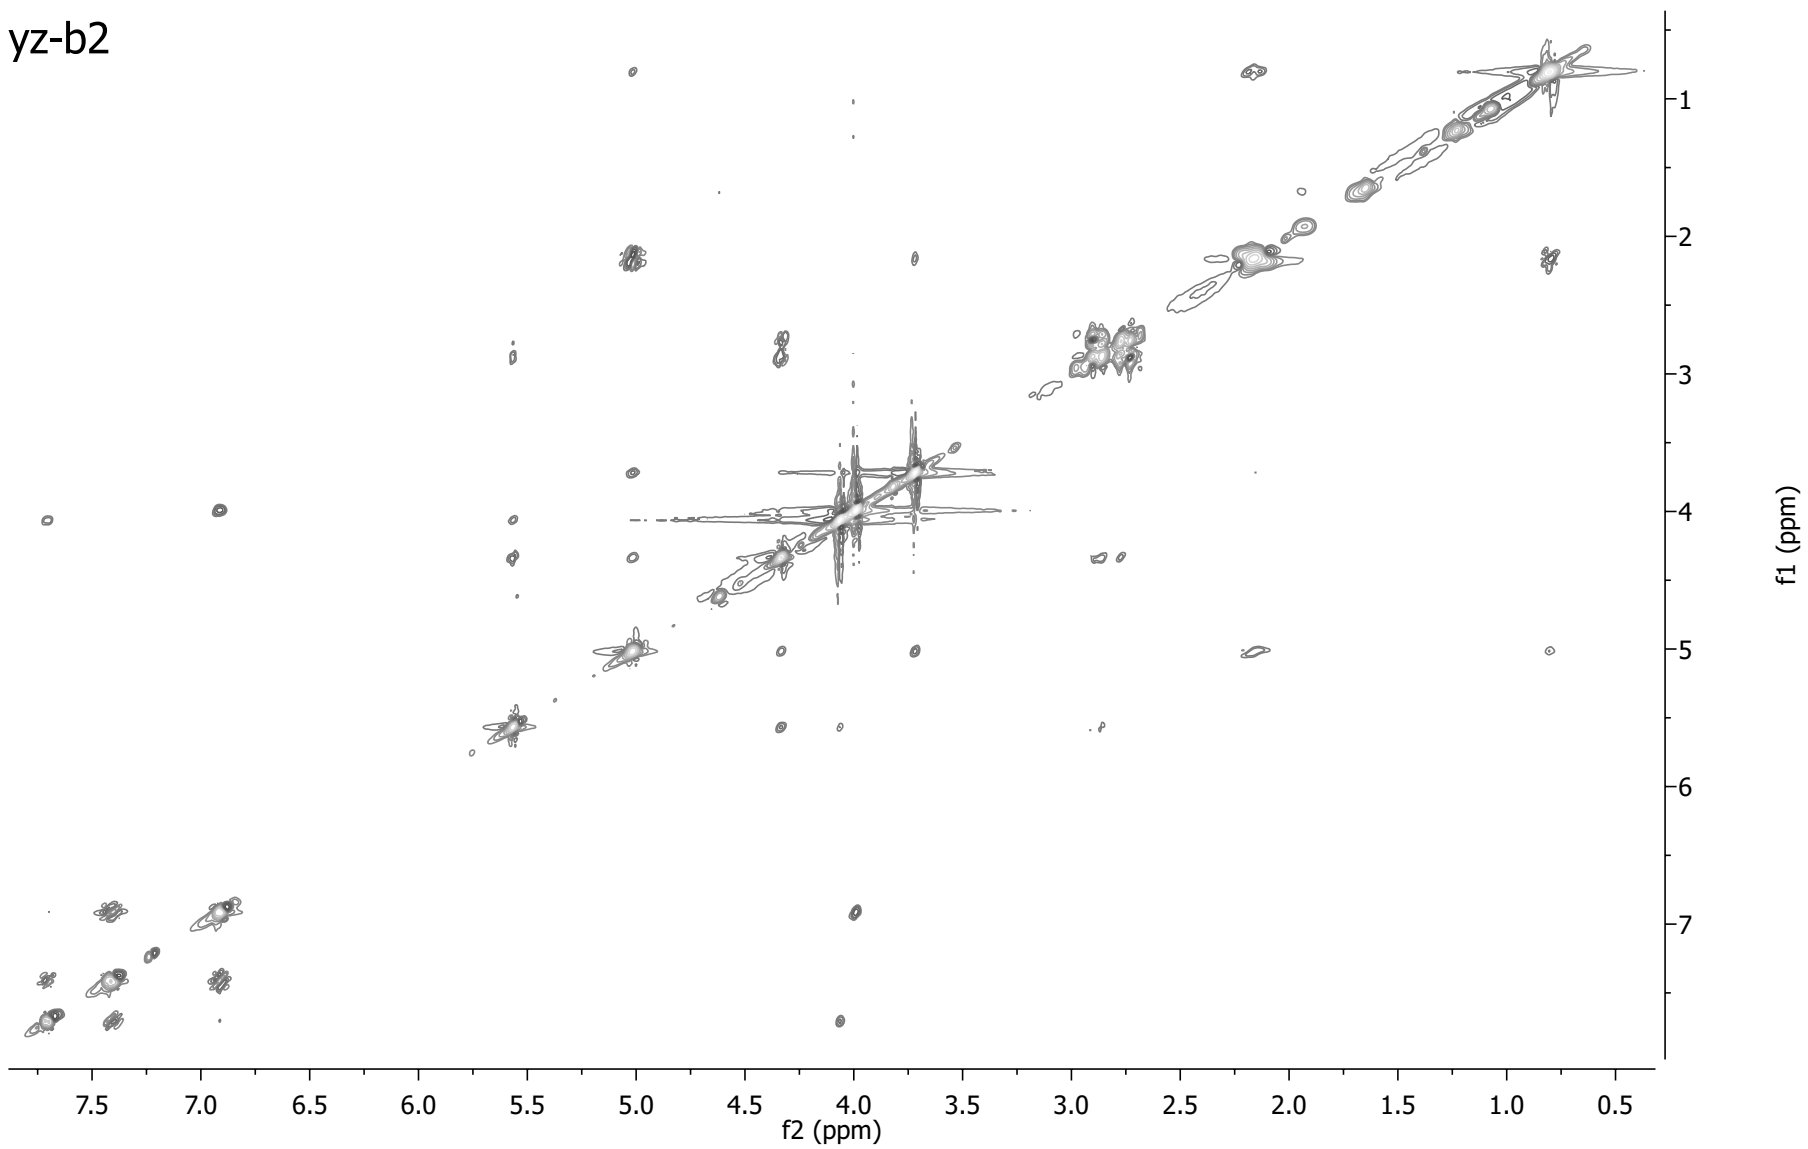

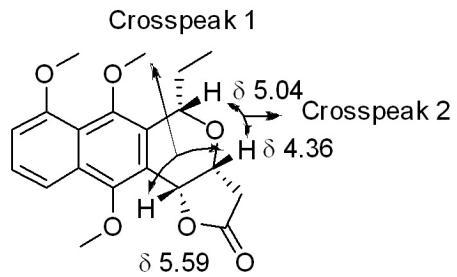

Scheme 2, compound 6b

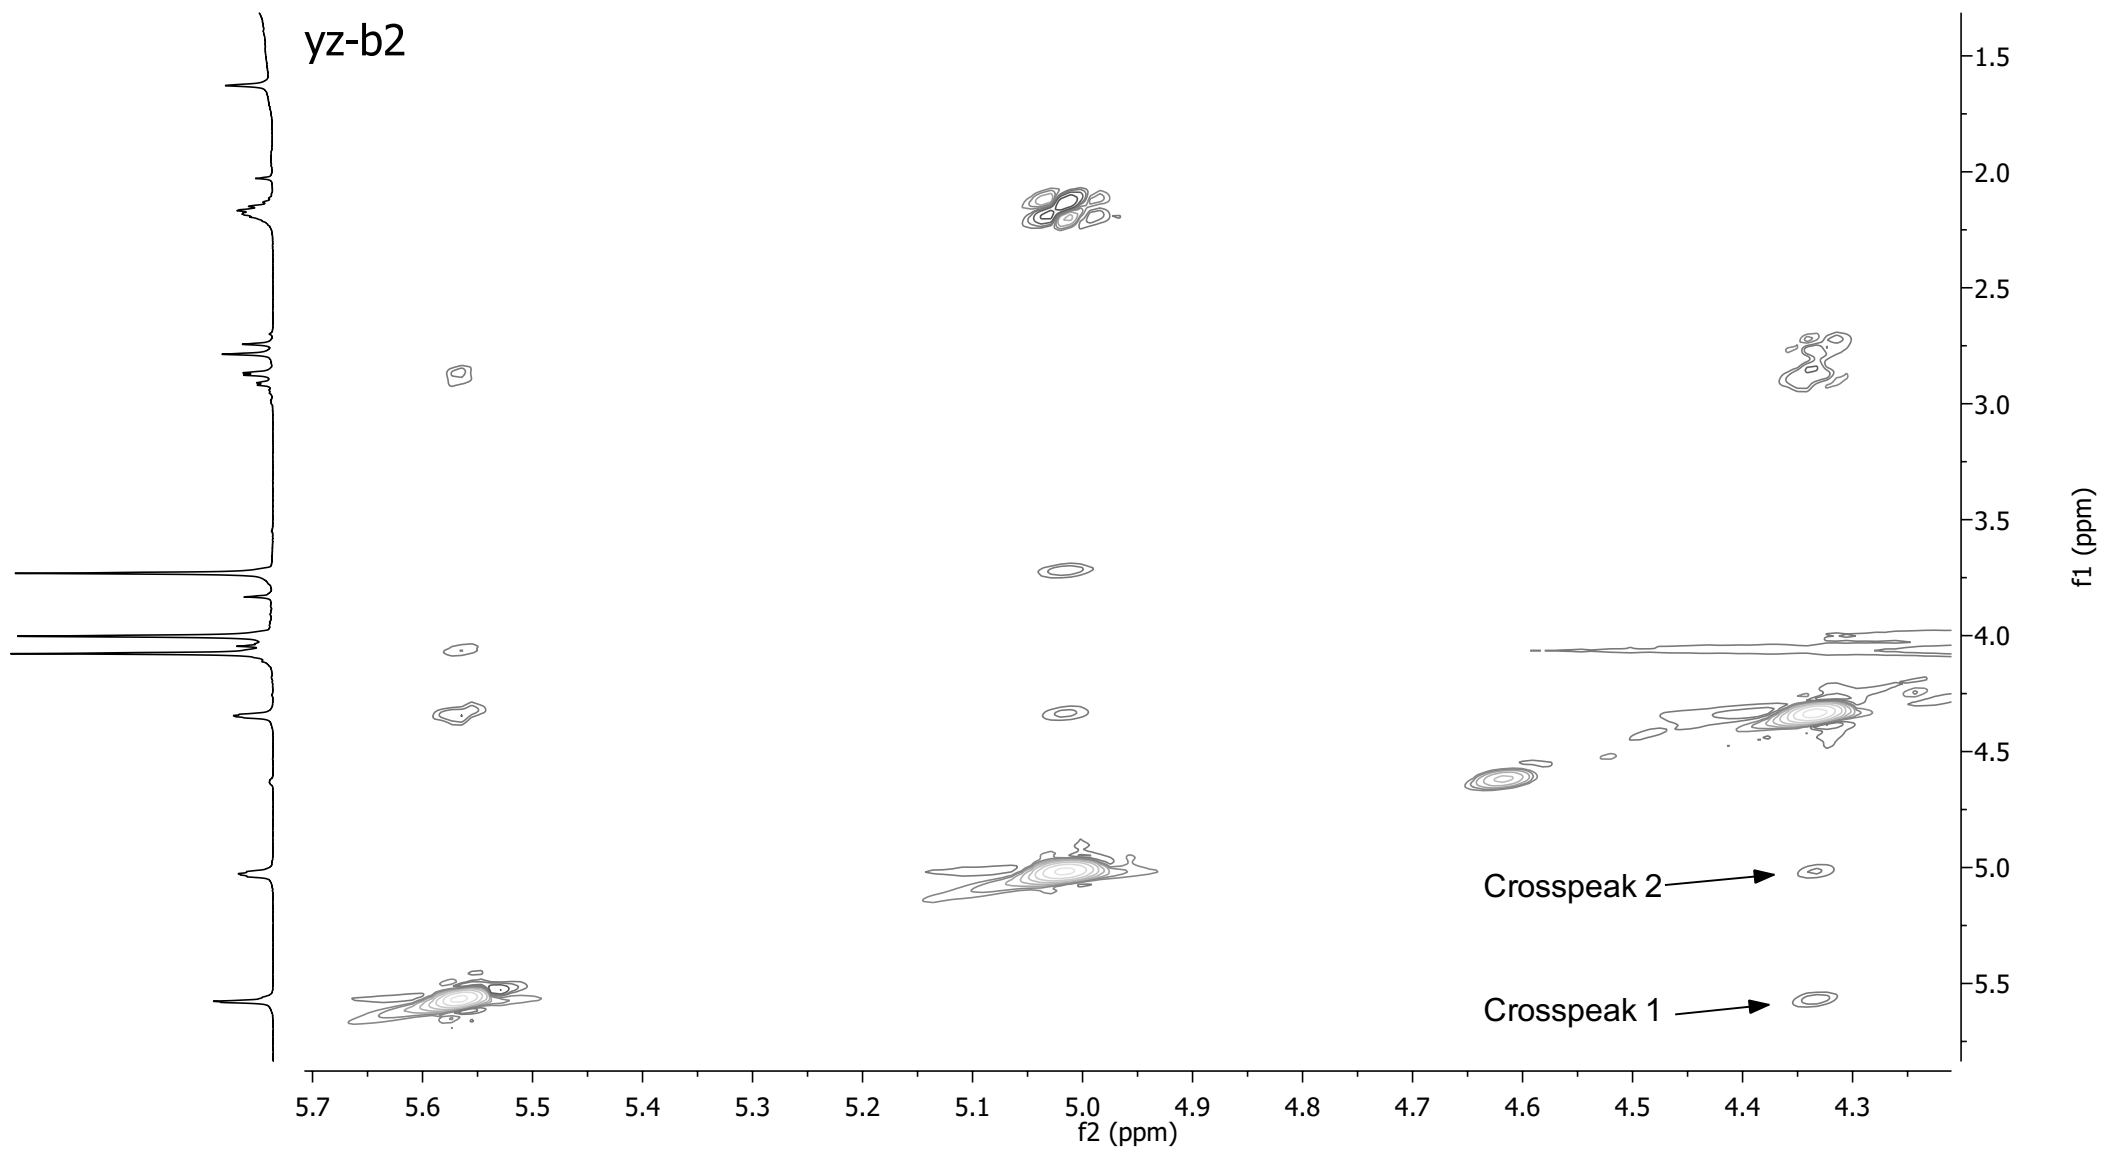

yz-b3

7.731  
7.710  
7.460  
7.441  
7.422  
7.420  
6.949  
6.929

5.579

5.171  
5.151

4.367  
4.360

4.081  
4.011

3.751

2.928  
2.920  
2.885  
2.875  
2.789  
2.746  
2.700  
2.660  
2.459  
2.415  
2.381  
2.227  
2.167  
2.104  
2.070  
2.034  
1.923

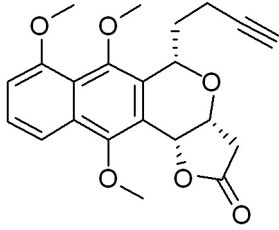

Scheme 2, compound 6c

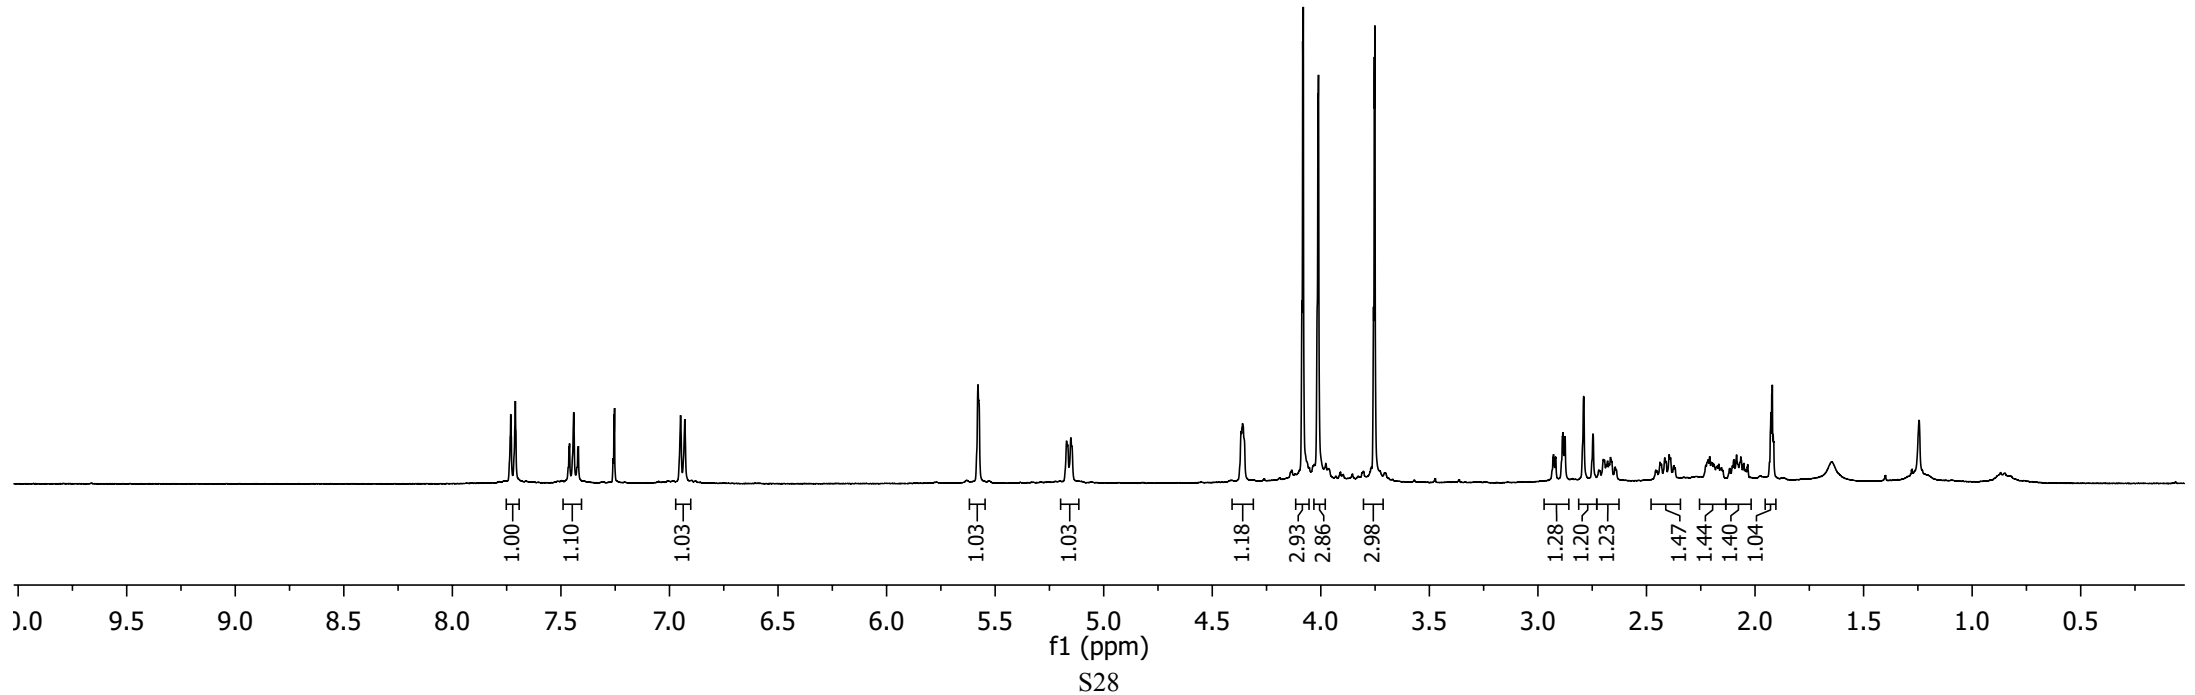

yz-b3

—175.805

~156.298  
~153.302  
~149.510

~130.406  
~127.051  
~126.828

~121.702  
~119.518  
~115.194

—107.407

—84.519  
77.478  
77.160  
76.842  
73.069  
73.053  
71.935  
71.211  
68.331  
64.617  
61.755  
—56.385

~38.503  
~34.138  
~29.542

—14.678

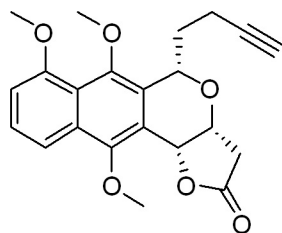

Scheme 2, compound 6c

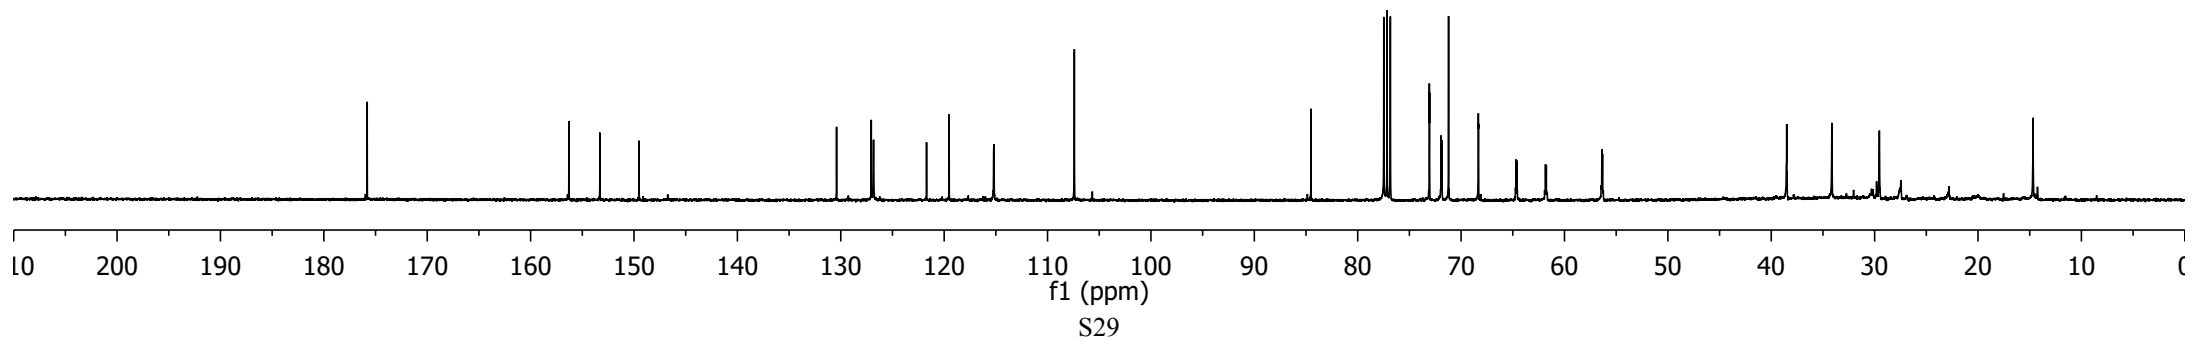

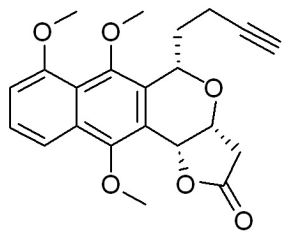

Scheme 2, compound 6c

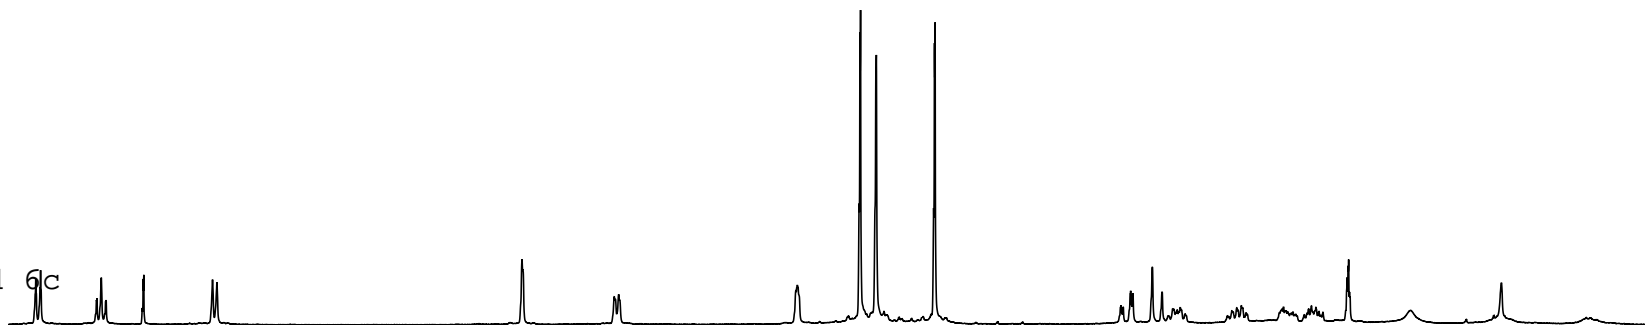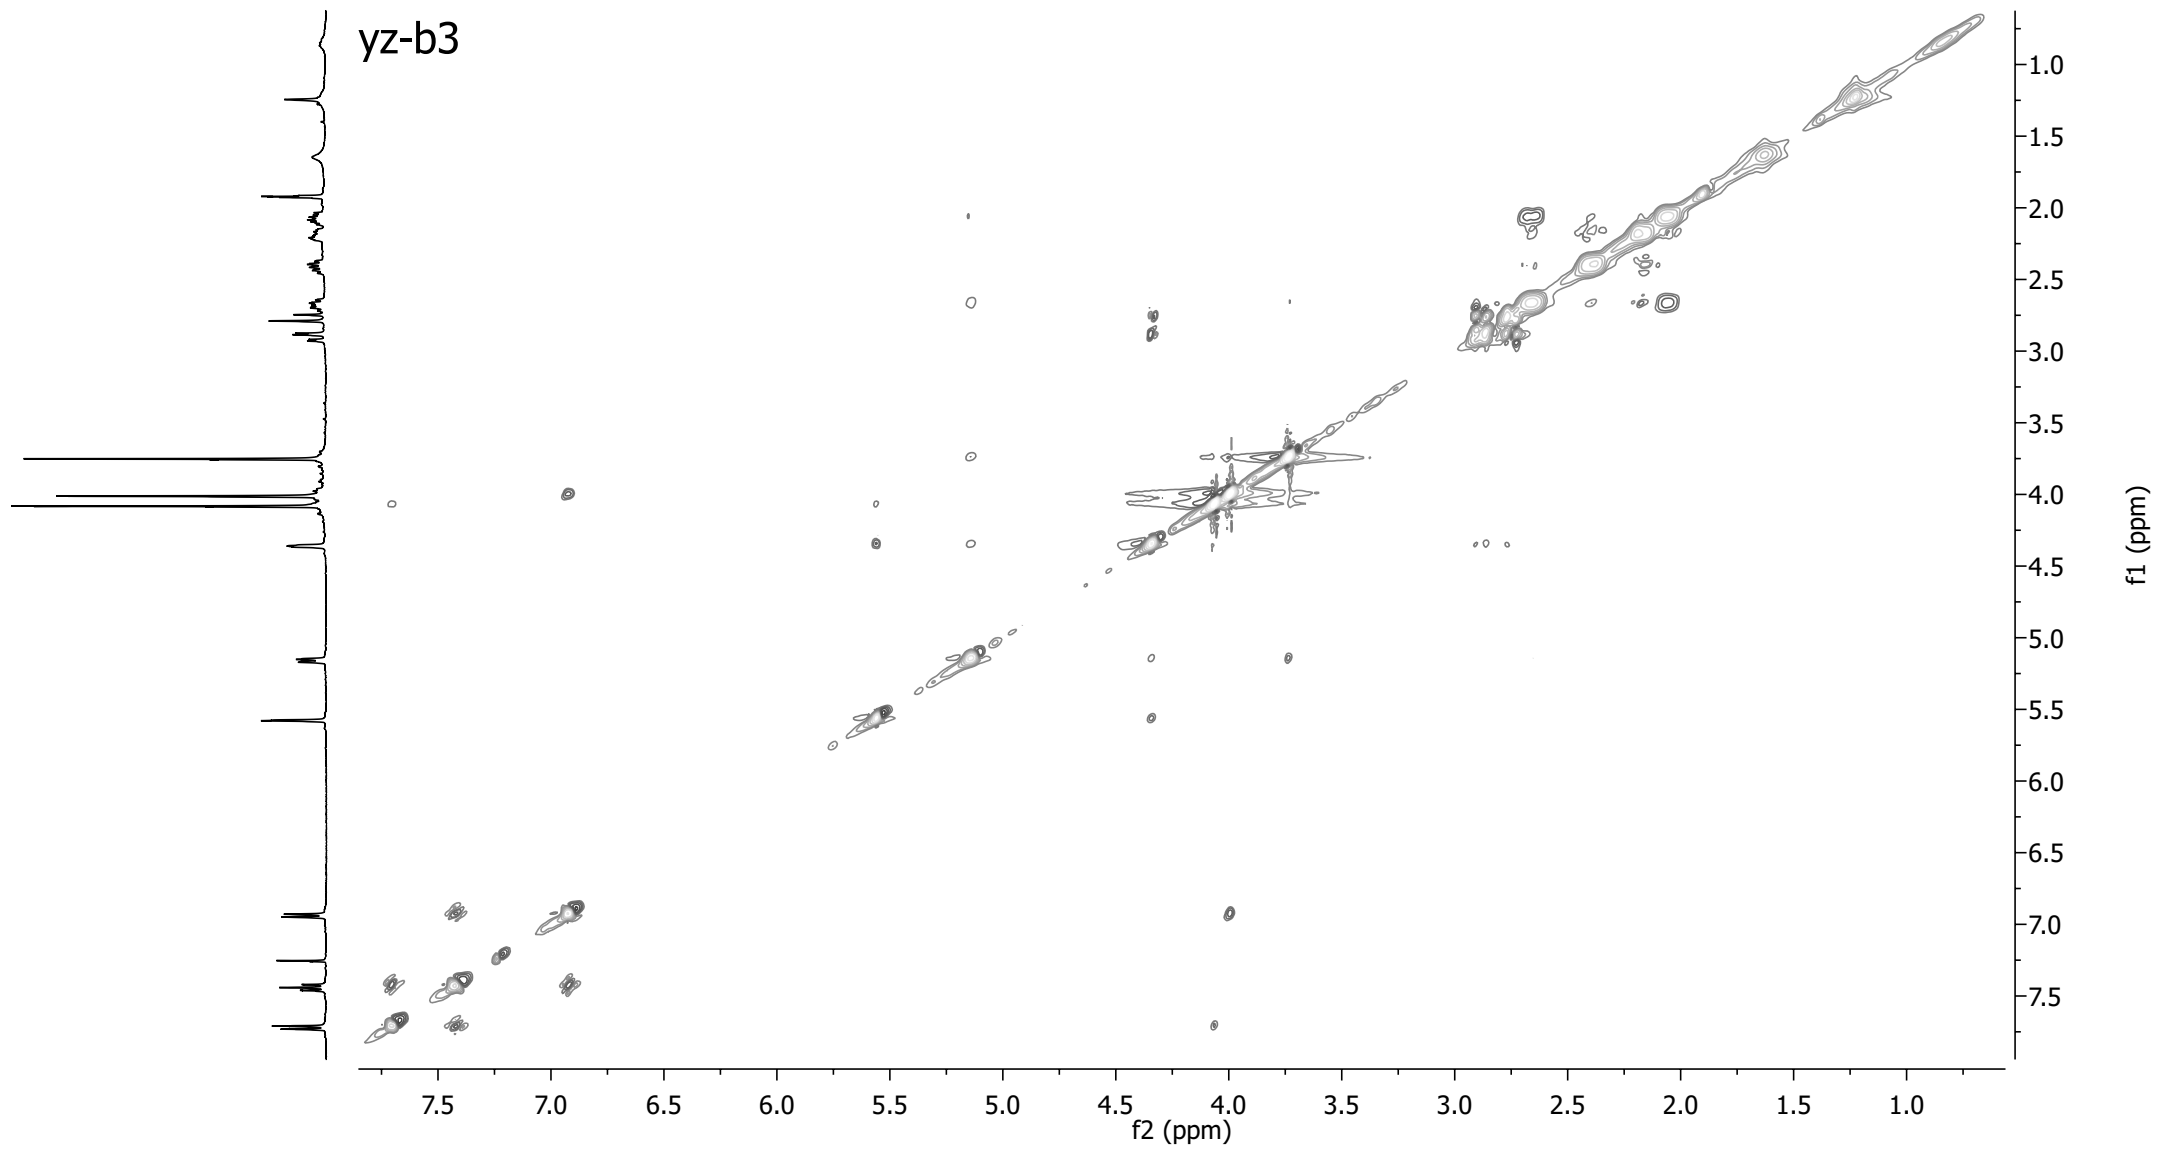

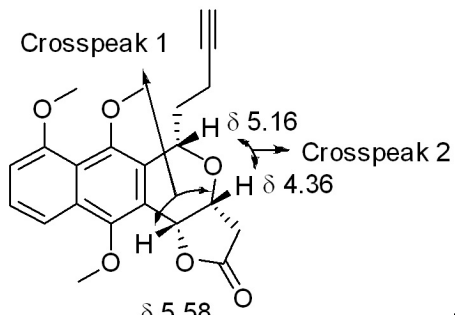

Scheme 2, compound 6c

yz-b3

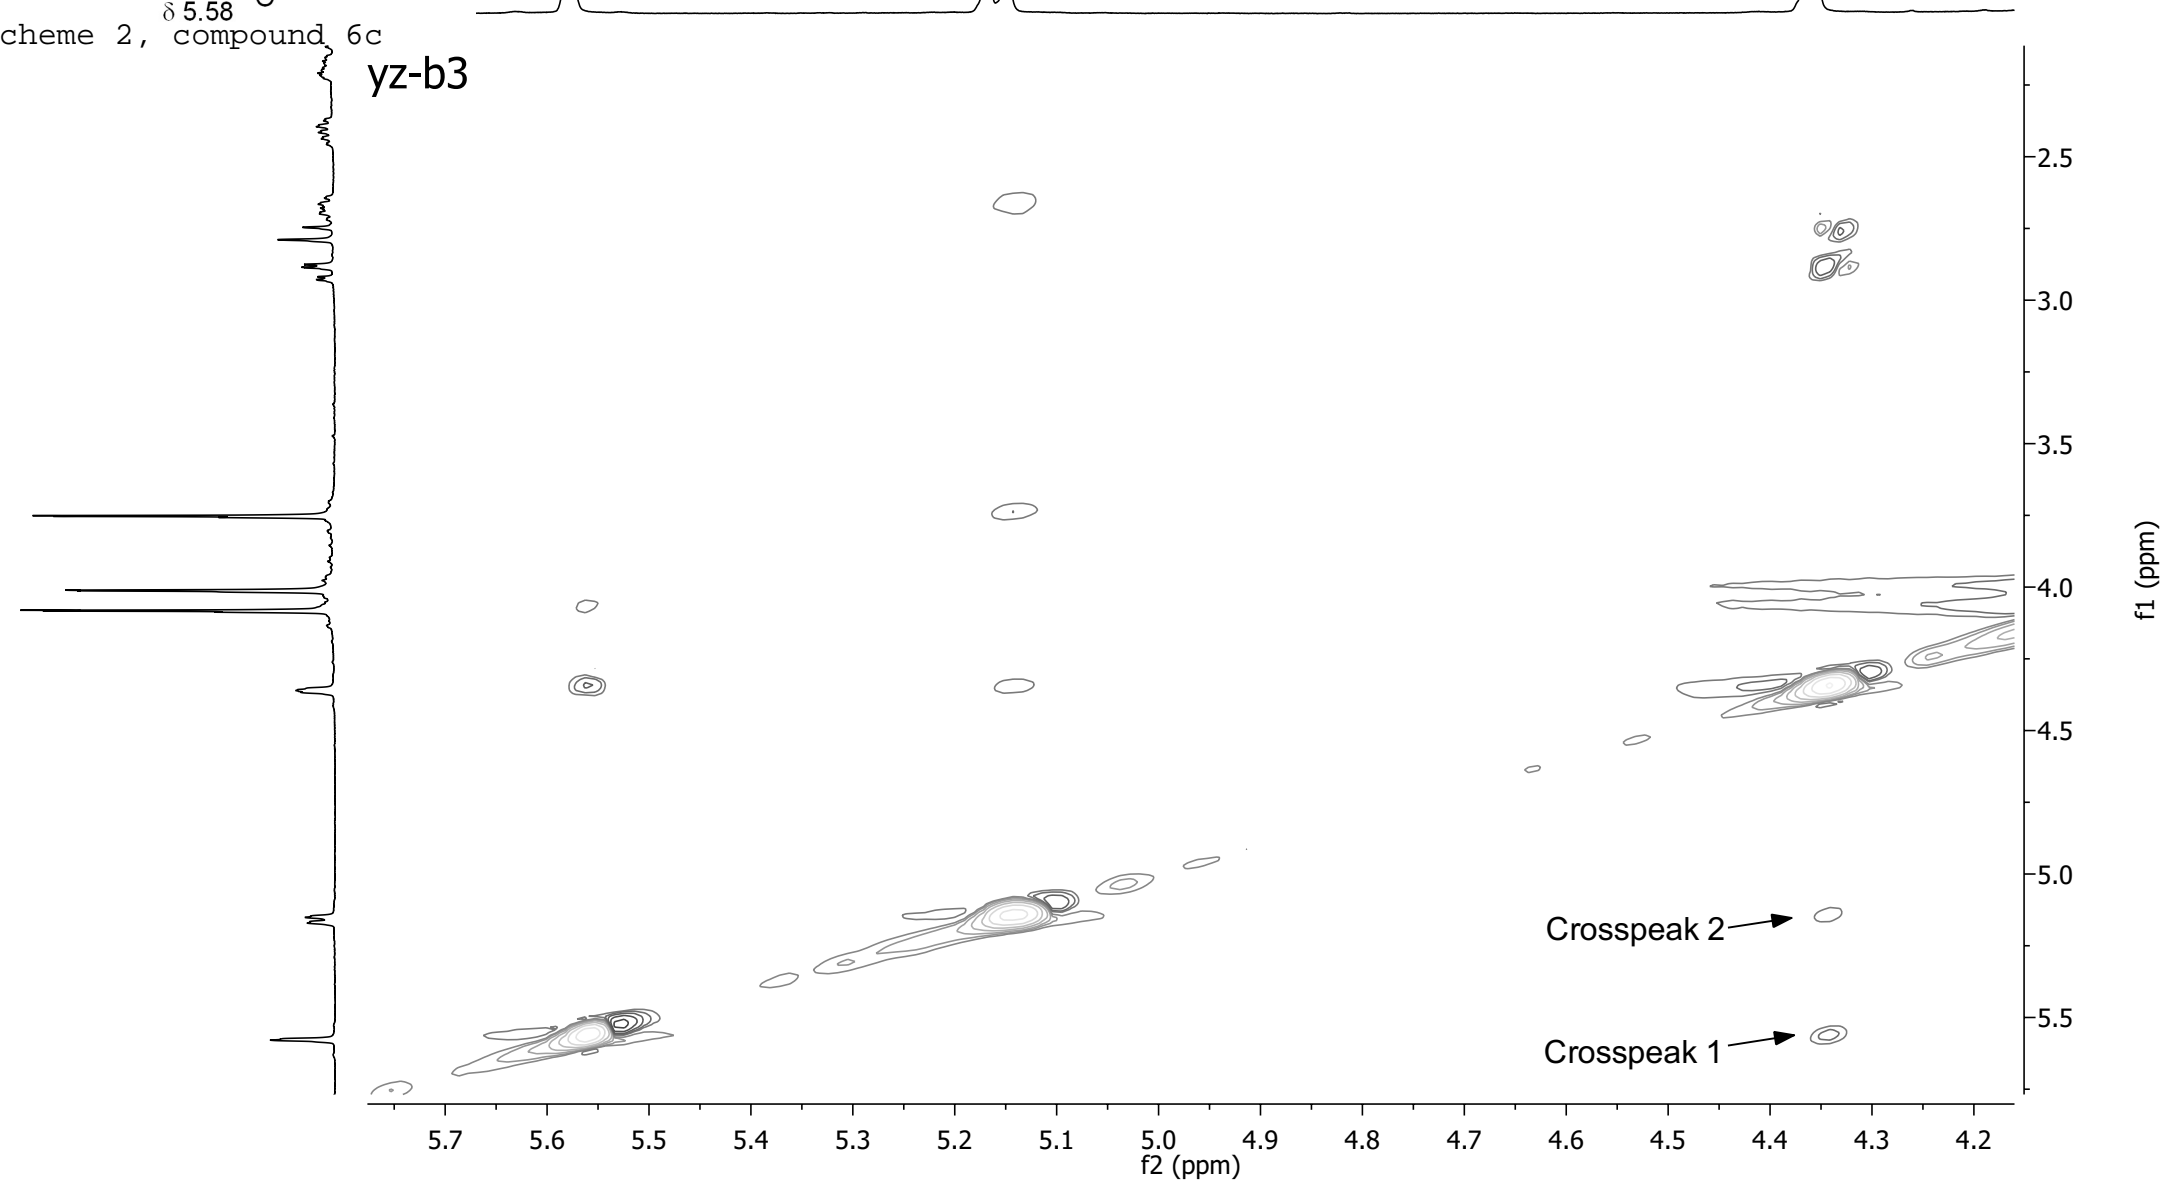

yz-b5

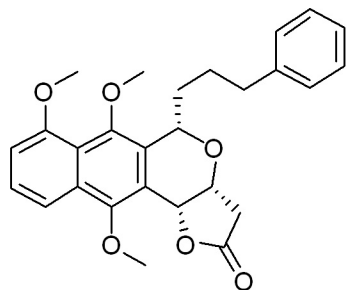

Scheme 2, compound 6d

7.744  
7.723  
7.463  
7.442  
7.422  
7.260  
7.257  
7.244  
7.225  
7.175  
7.157  
7.140  
6.953  
6.934

5.590  
5.586

5.080  
5.074  
5.062  
5.056

4.342  
4.336  
4.094  
4.018

3.721  
2.927  
2.917  
2.884  
2.874  
2.795  
2.752  
2.643  
2.622  
2.603  
2.584  
2.367  
2.308  
2.129  
2.077  
2.048  
1.764  
1.700  
1.665

1.261

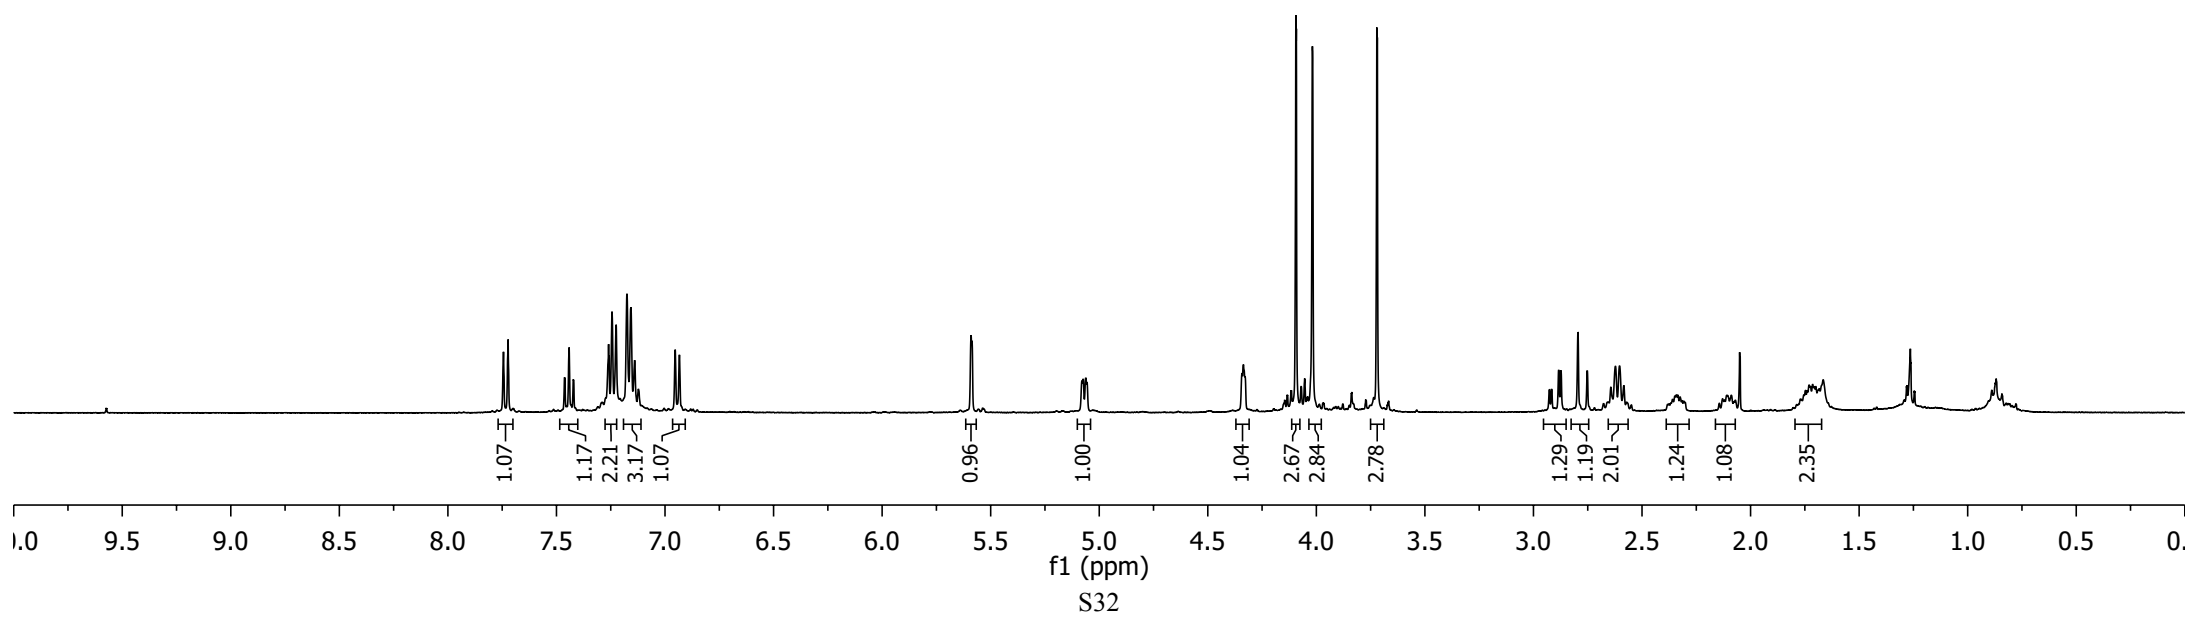



yz-b5

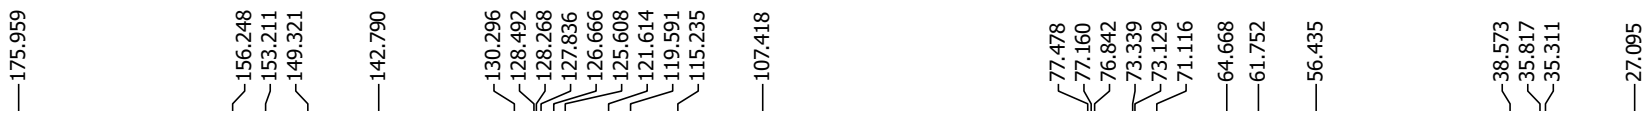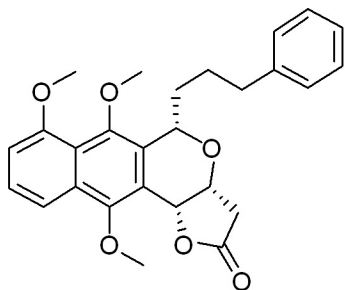

Scheme 2, compound 6d

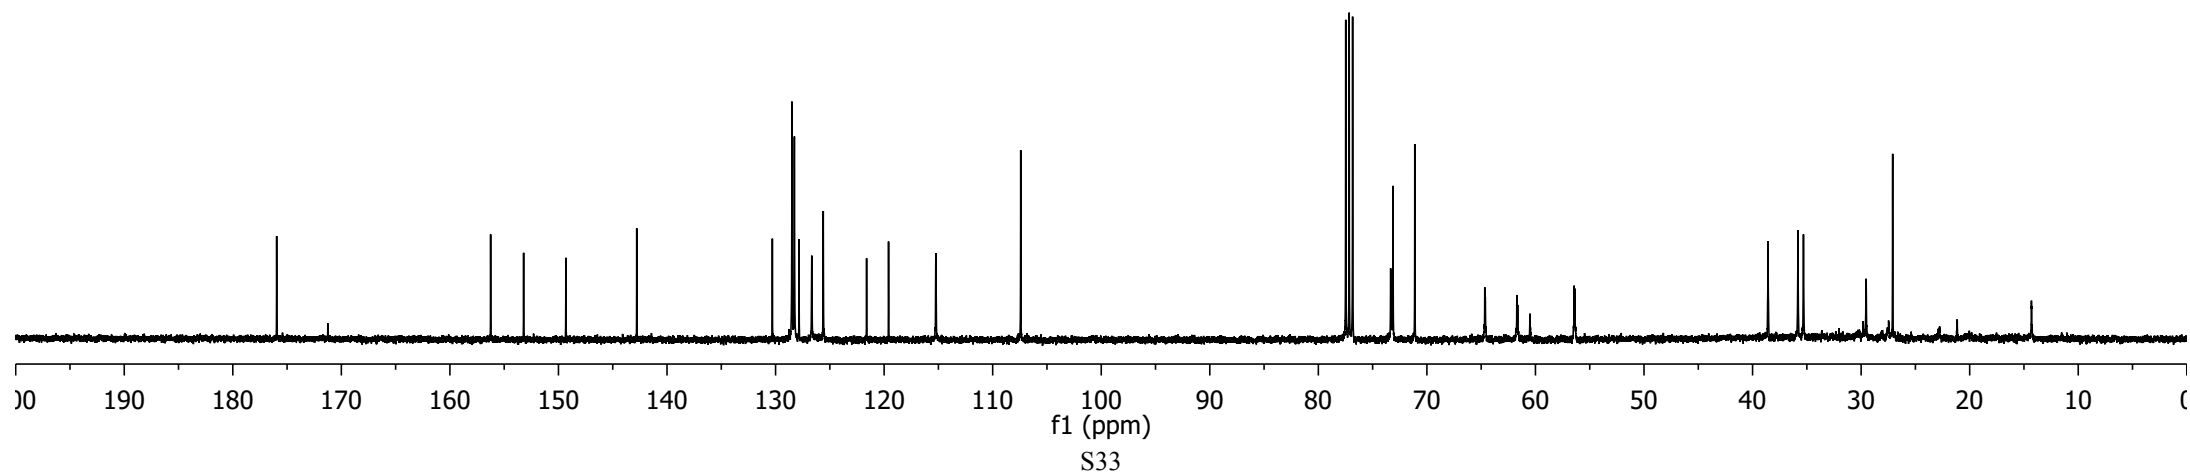

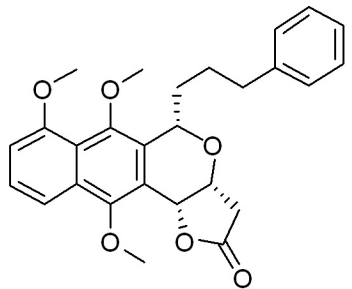

Scheme 2, compound 6d

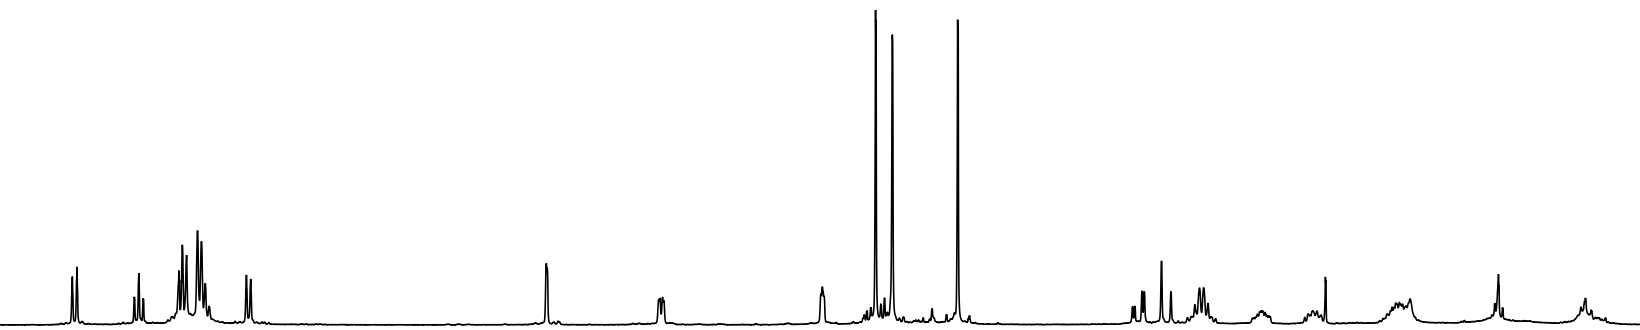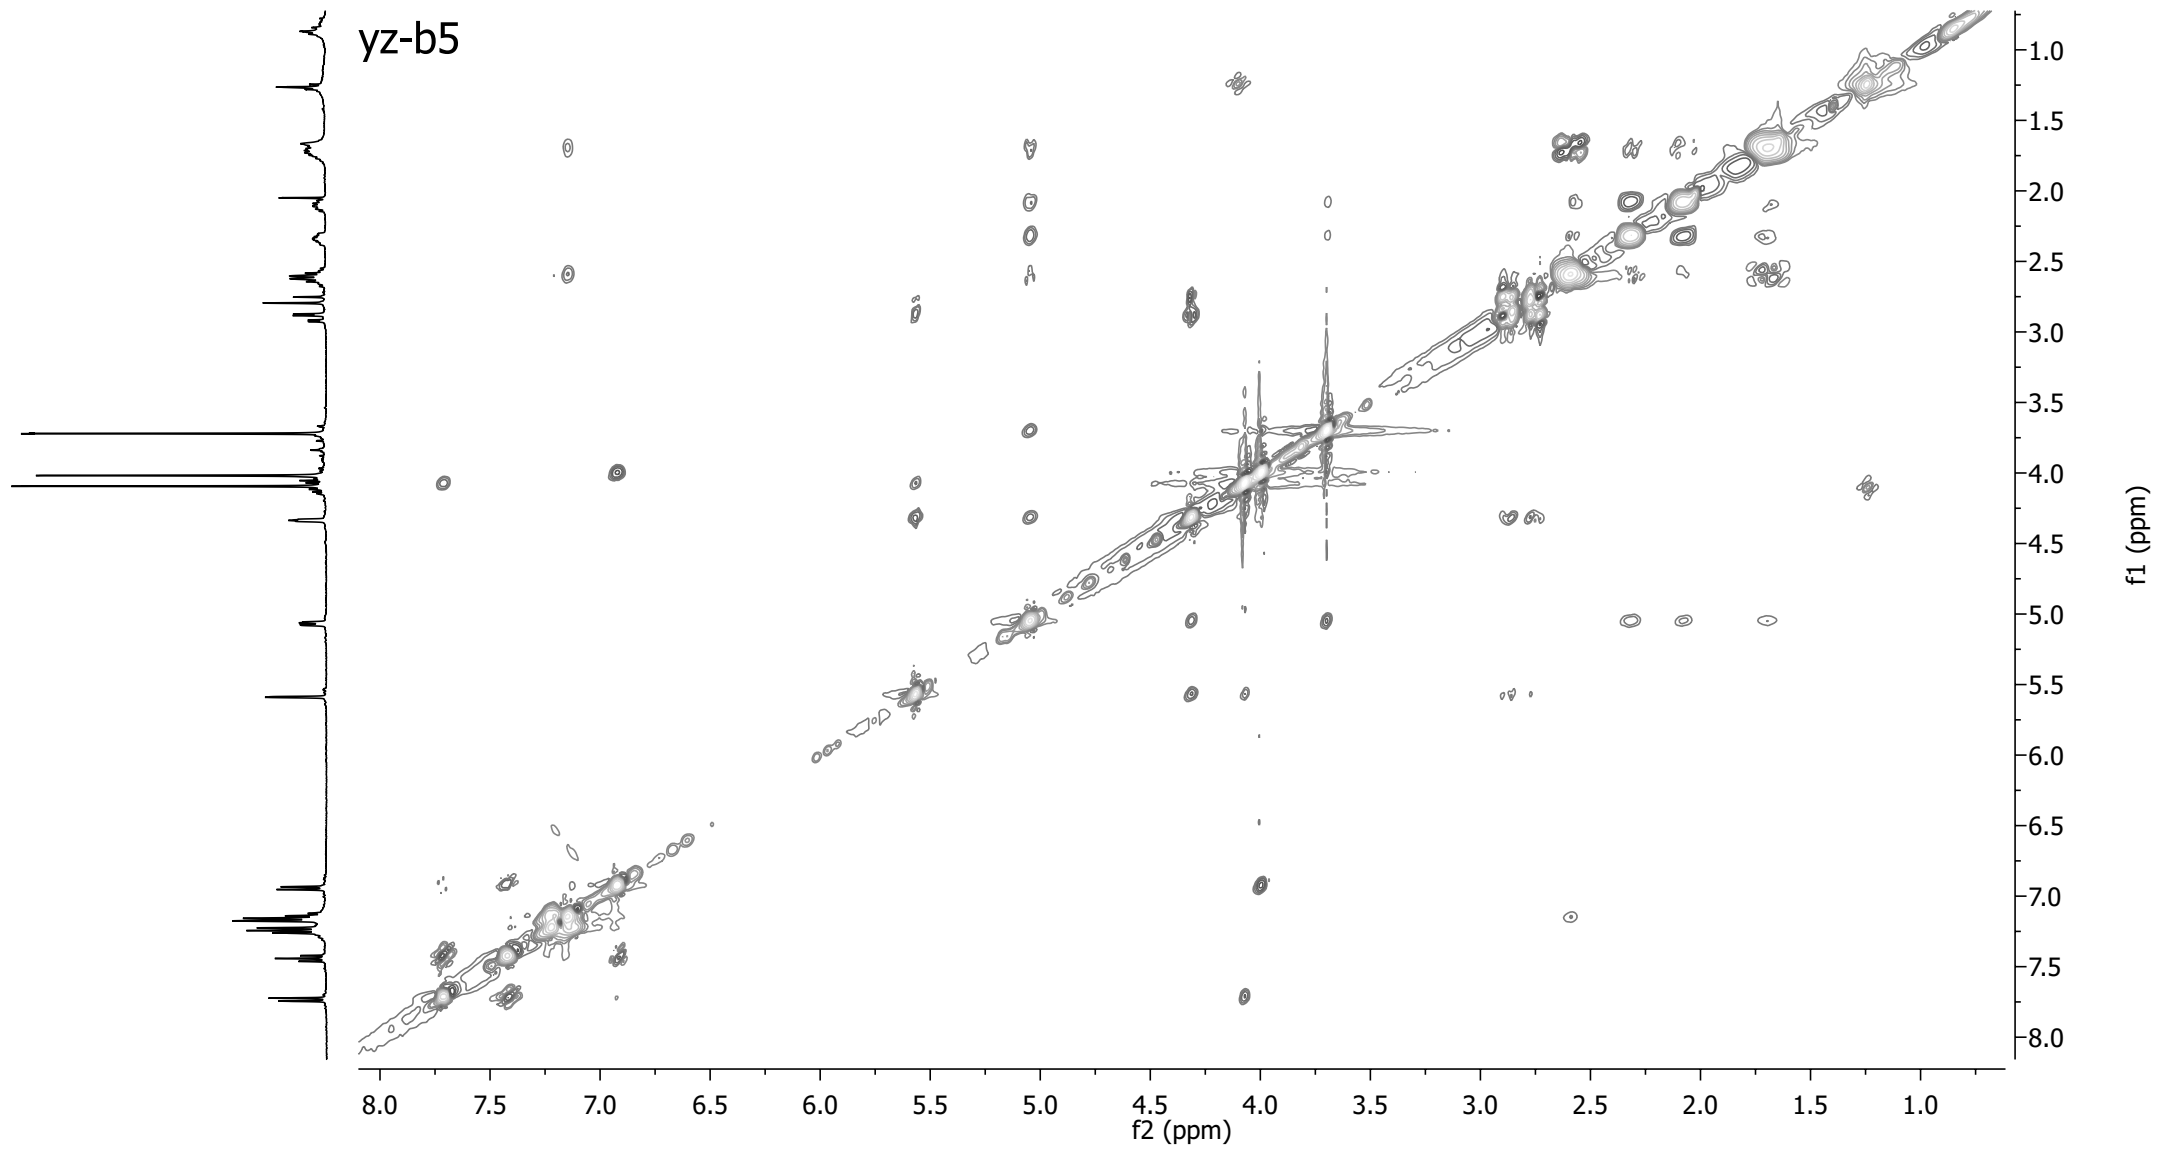

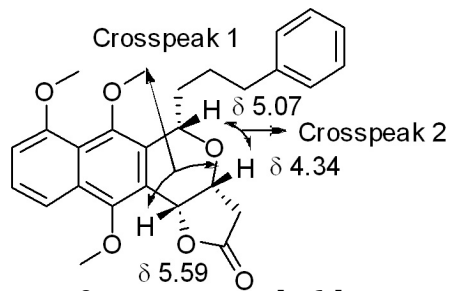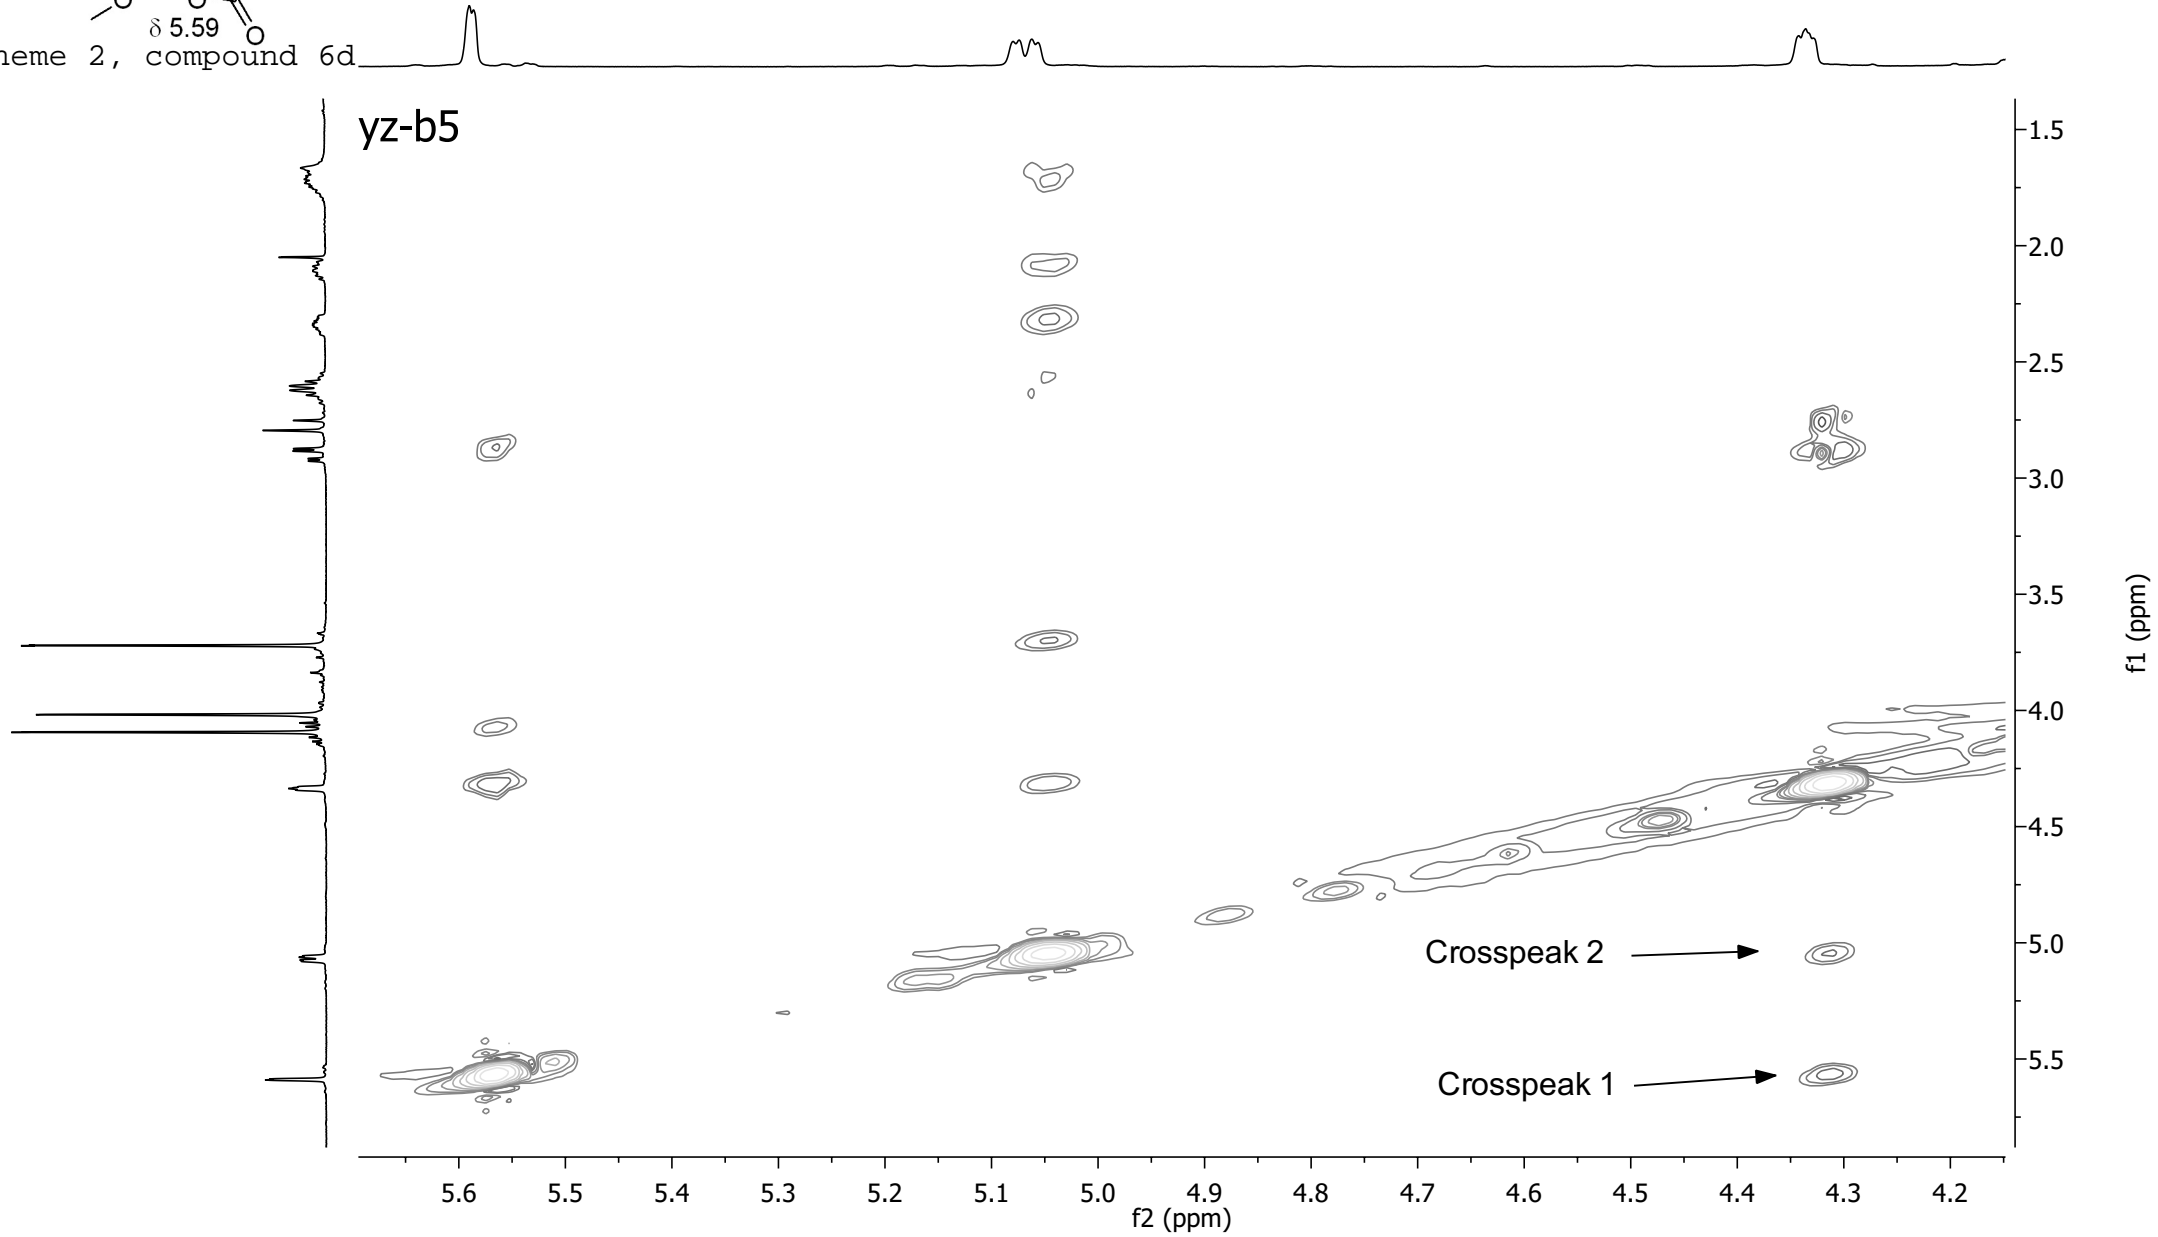

yz-b27

7.749  
7.728  
7.475  
7.455  
7.435  
7.276  
7.260  
7.249  
7.207  
7.191  
6.975  
6.956

5.561  
5.558

5.203  
5.184

4.270  
4.059  
4.048  
3.856

2.927  
2.905  
2.893  
2.871  
2.860  
2.849  
2.816  
2.806  
2.741  
2.698

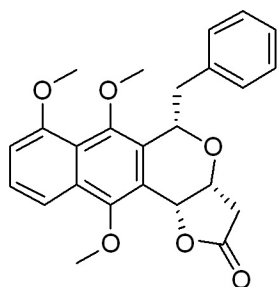

Scheme 2, compound 6e

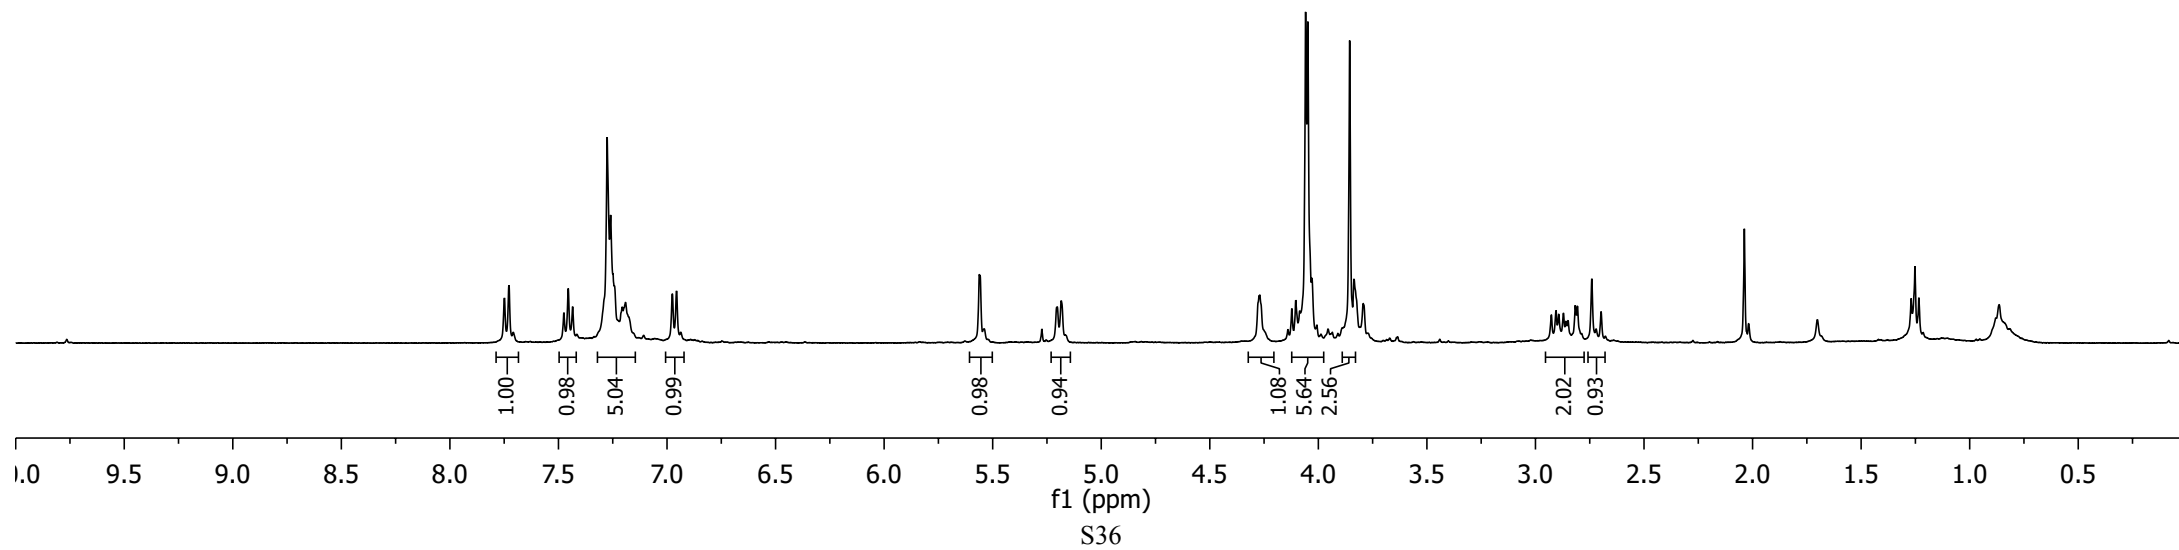

yz-b27

—175.979

—156.240

—153.277

—149.396

—139.415

—130.380

—129.908

—128.072

—127.477

—126.796

—126.220

—121.689

—119.278

—115.265

—107.455

—77.478

—77.160

—76.842

—74.550

—72.934

—71.016

—64.732

—61.902

—56.449

—42.664

—38.617

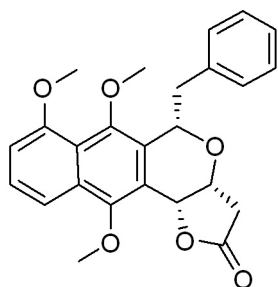

Scheme 2, compound 6e

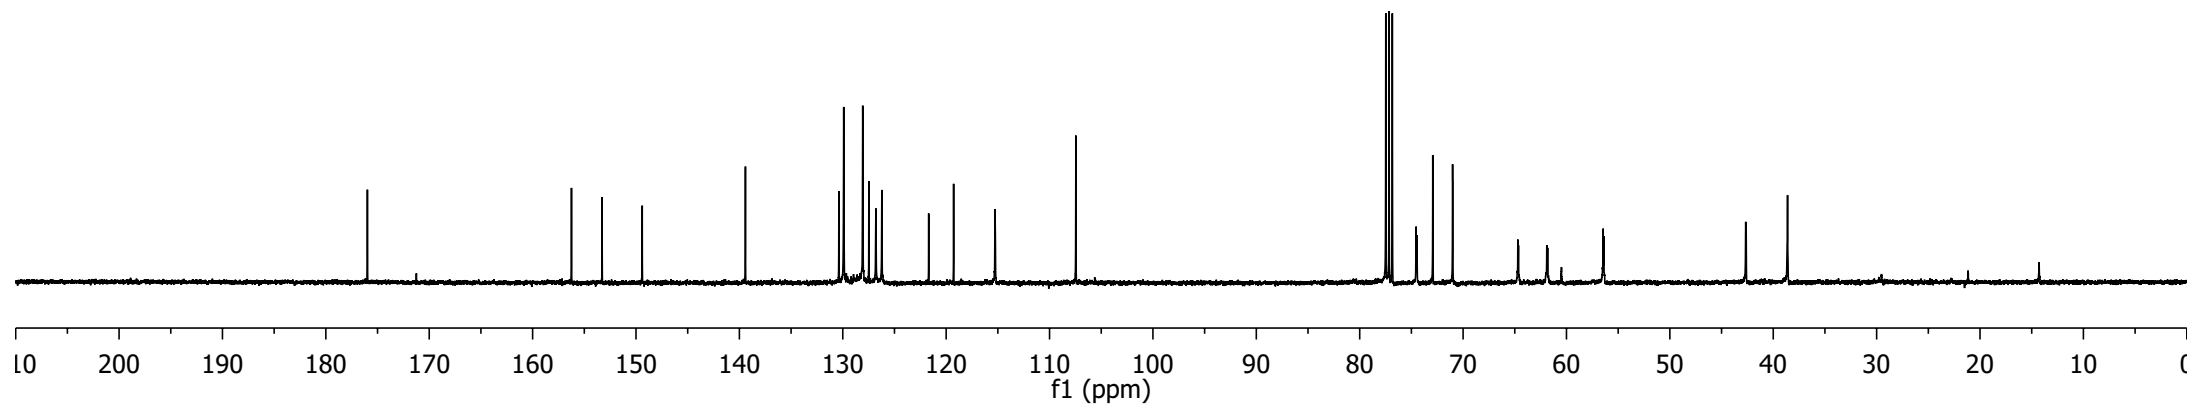

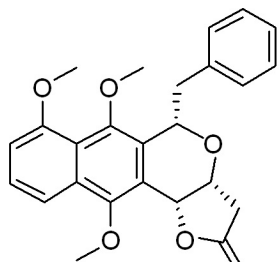

Scheme 2, compound 6e

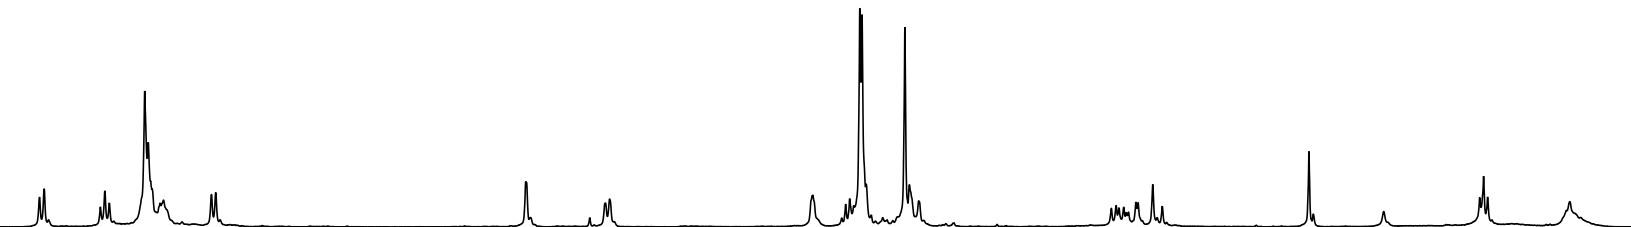

yz-b27

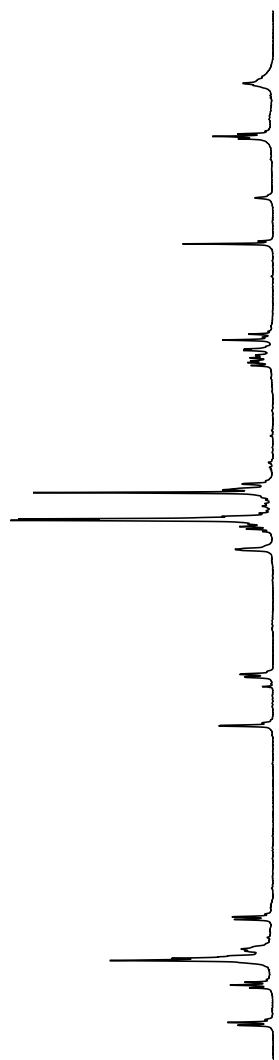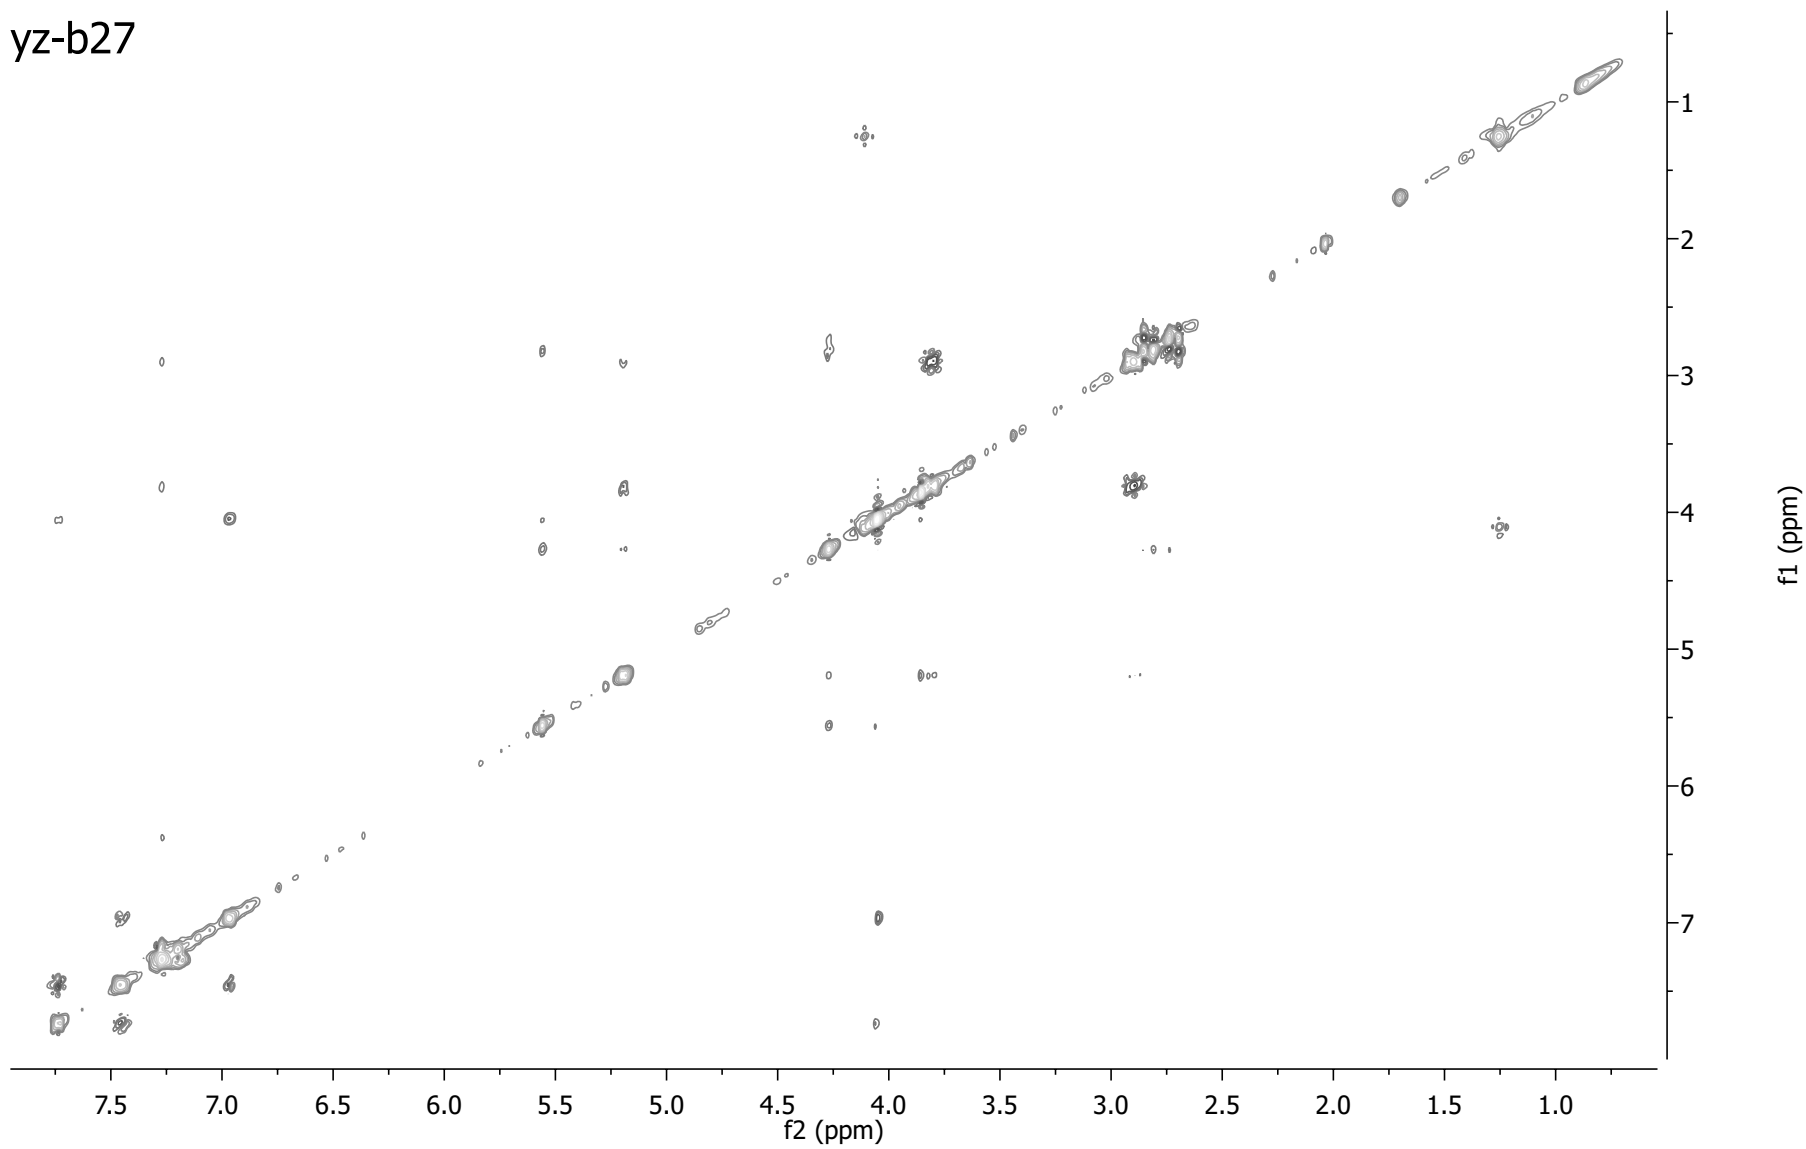

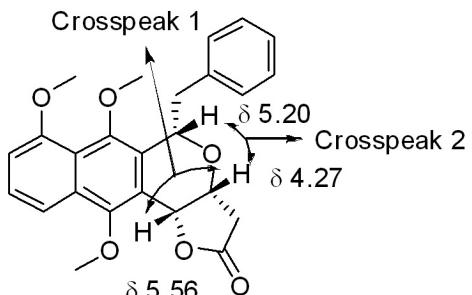

Scheme 2, compound 6e

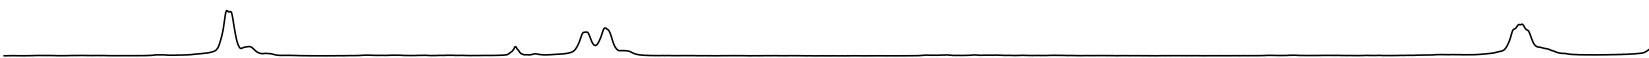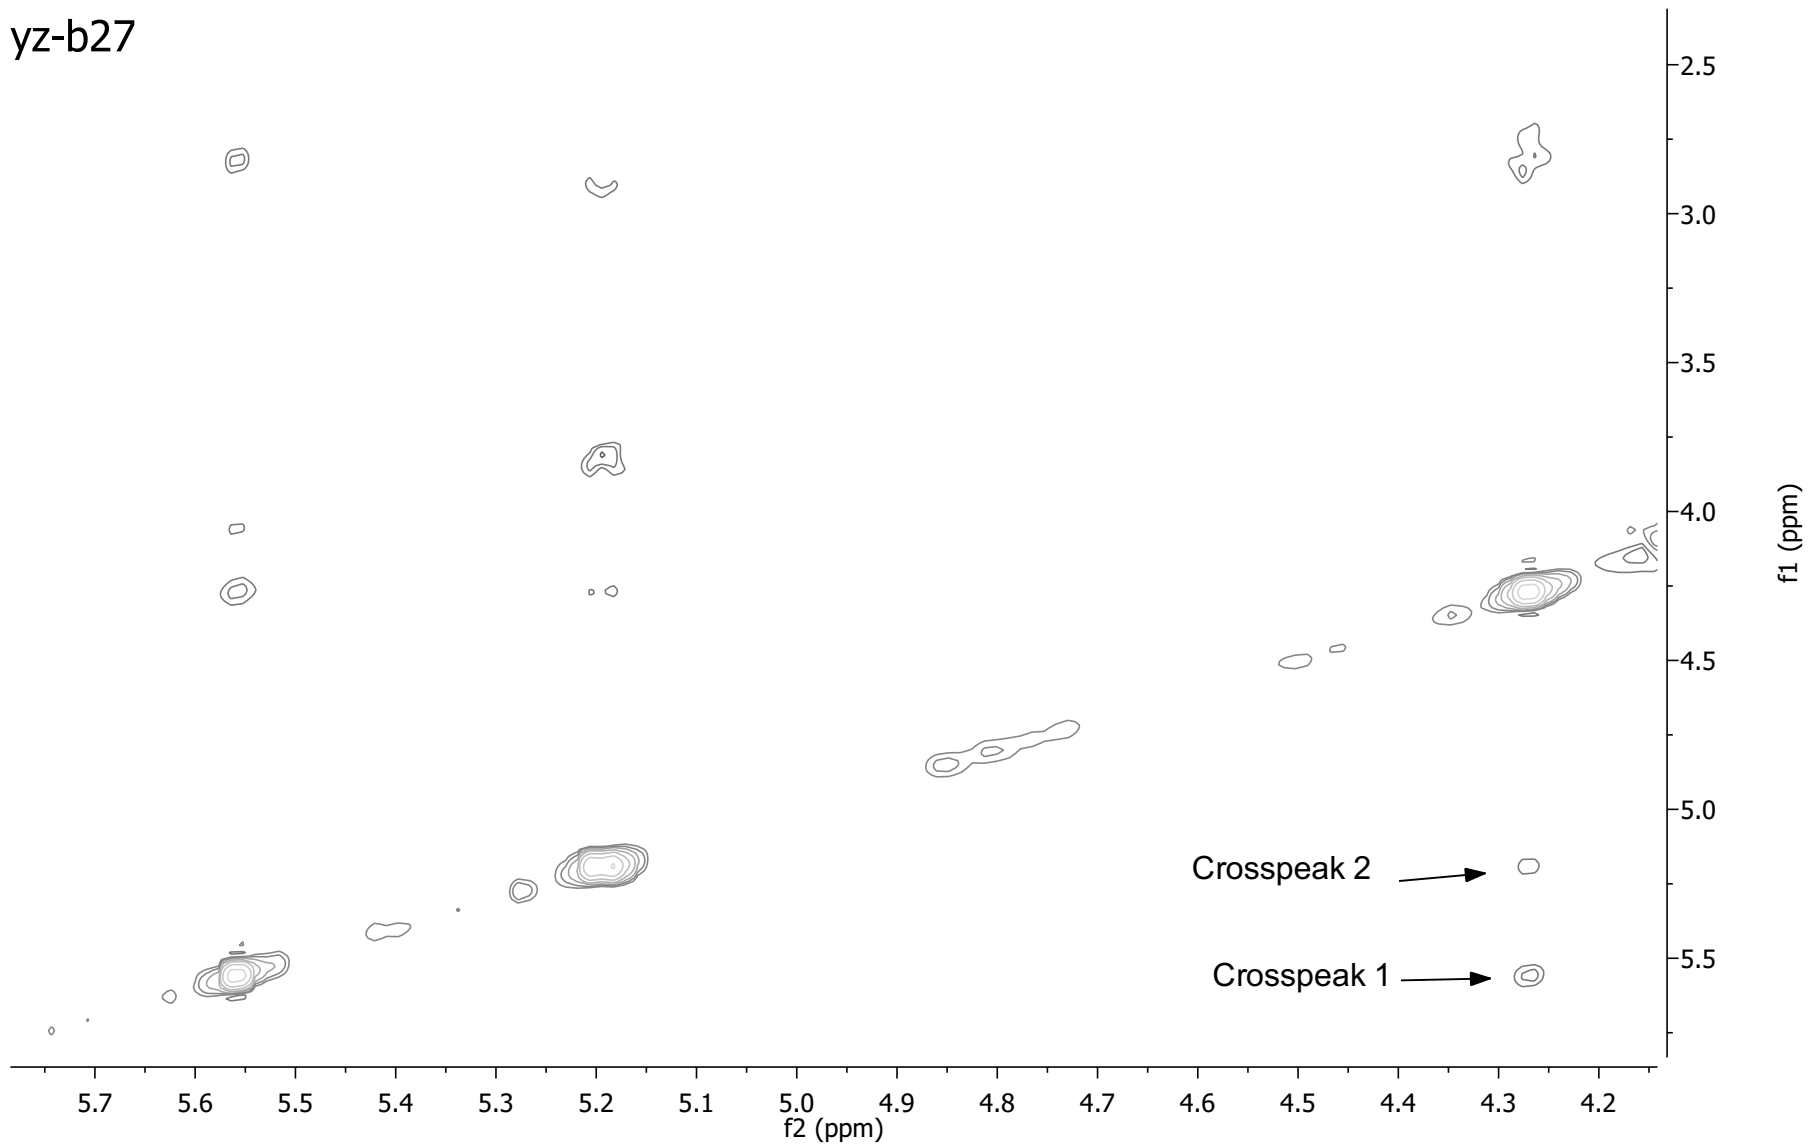

yz-b32

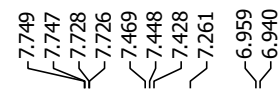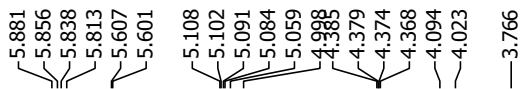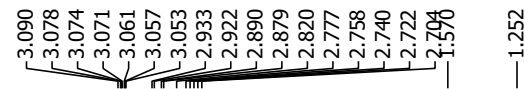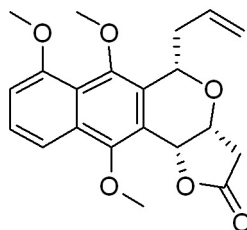

Scheme 2, compound 6fa

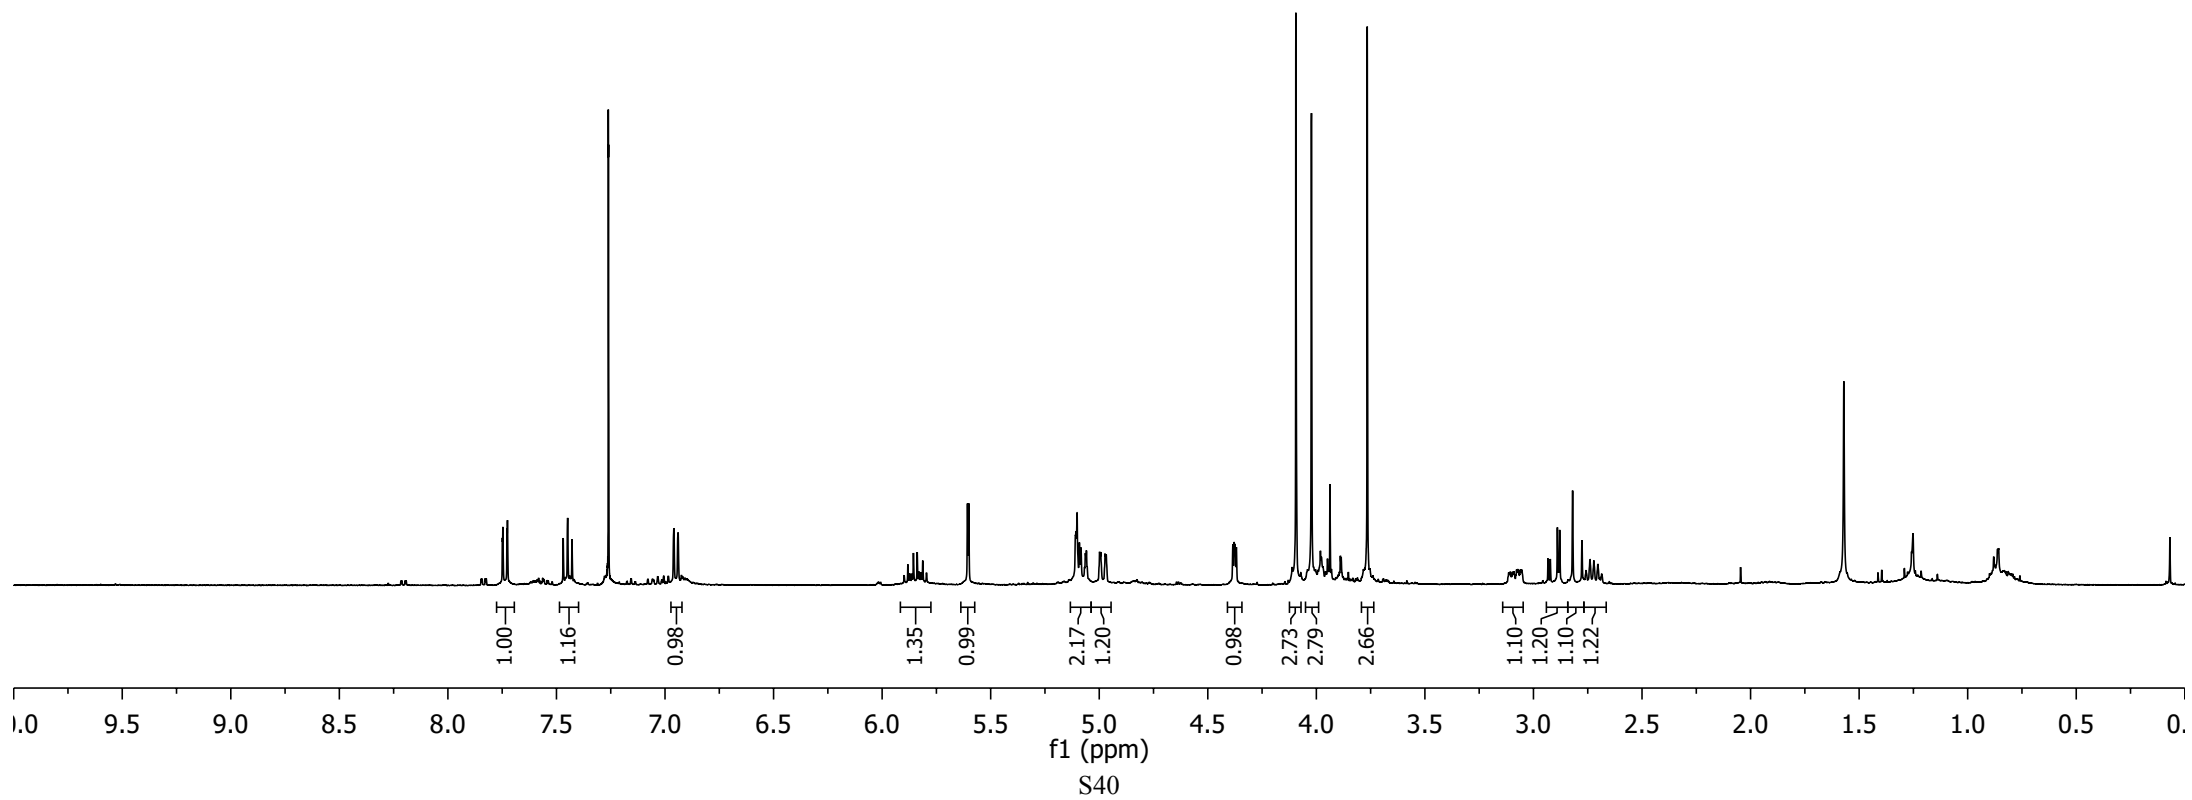



yz-b32

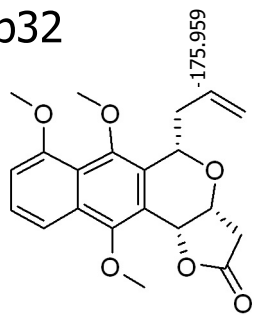

Scheme 2, compound 6fa

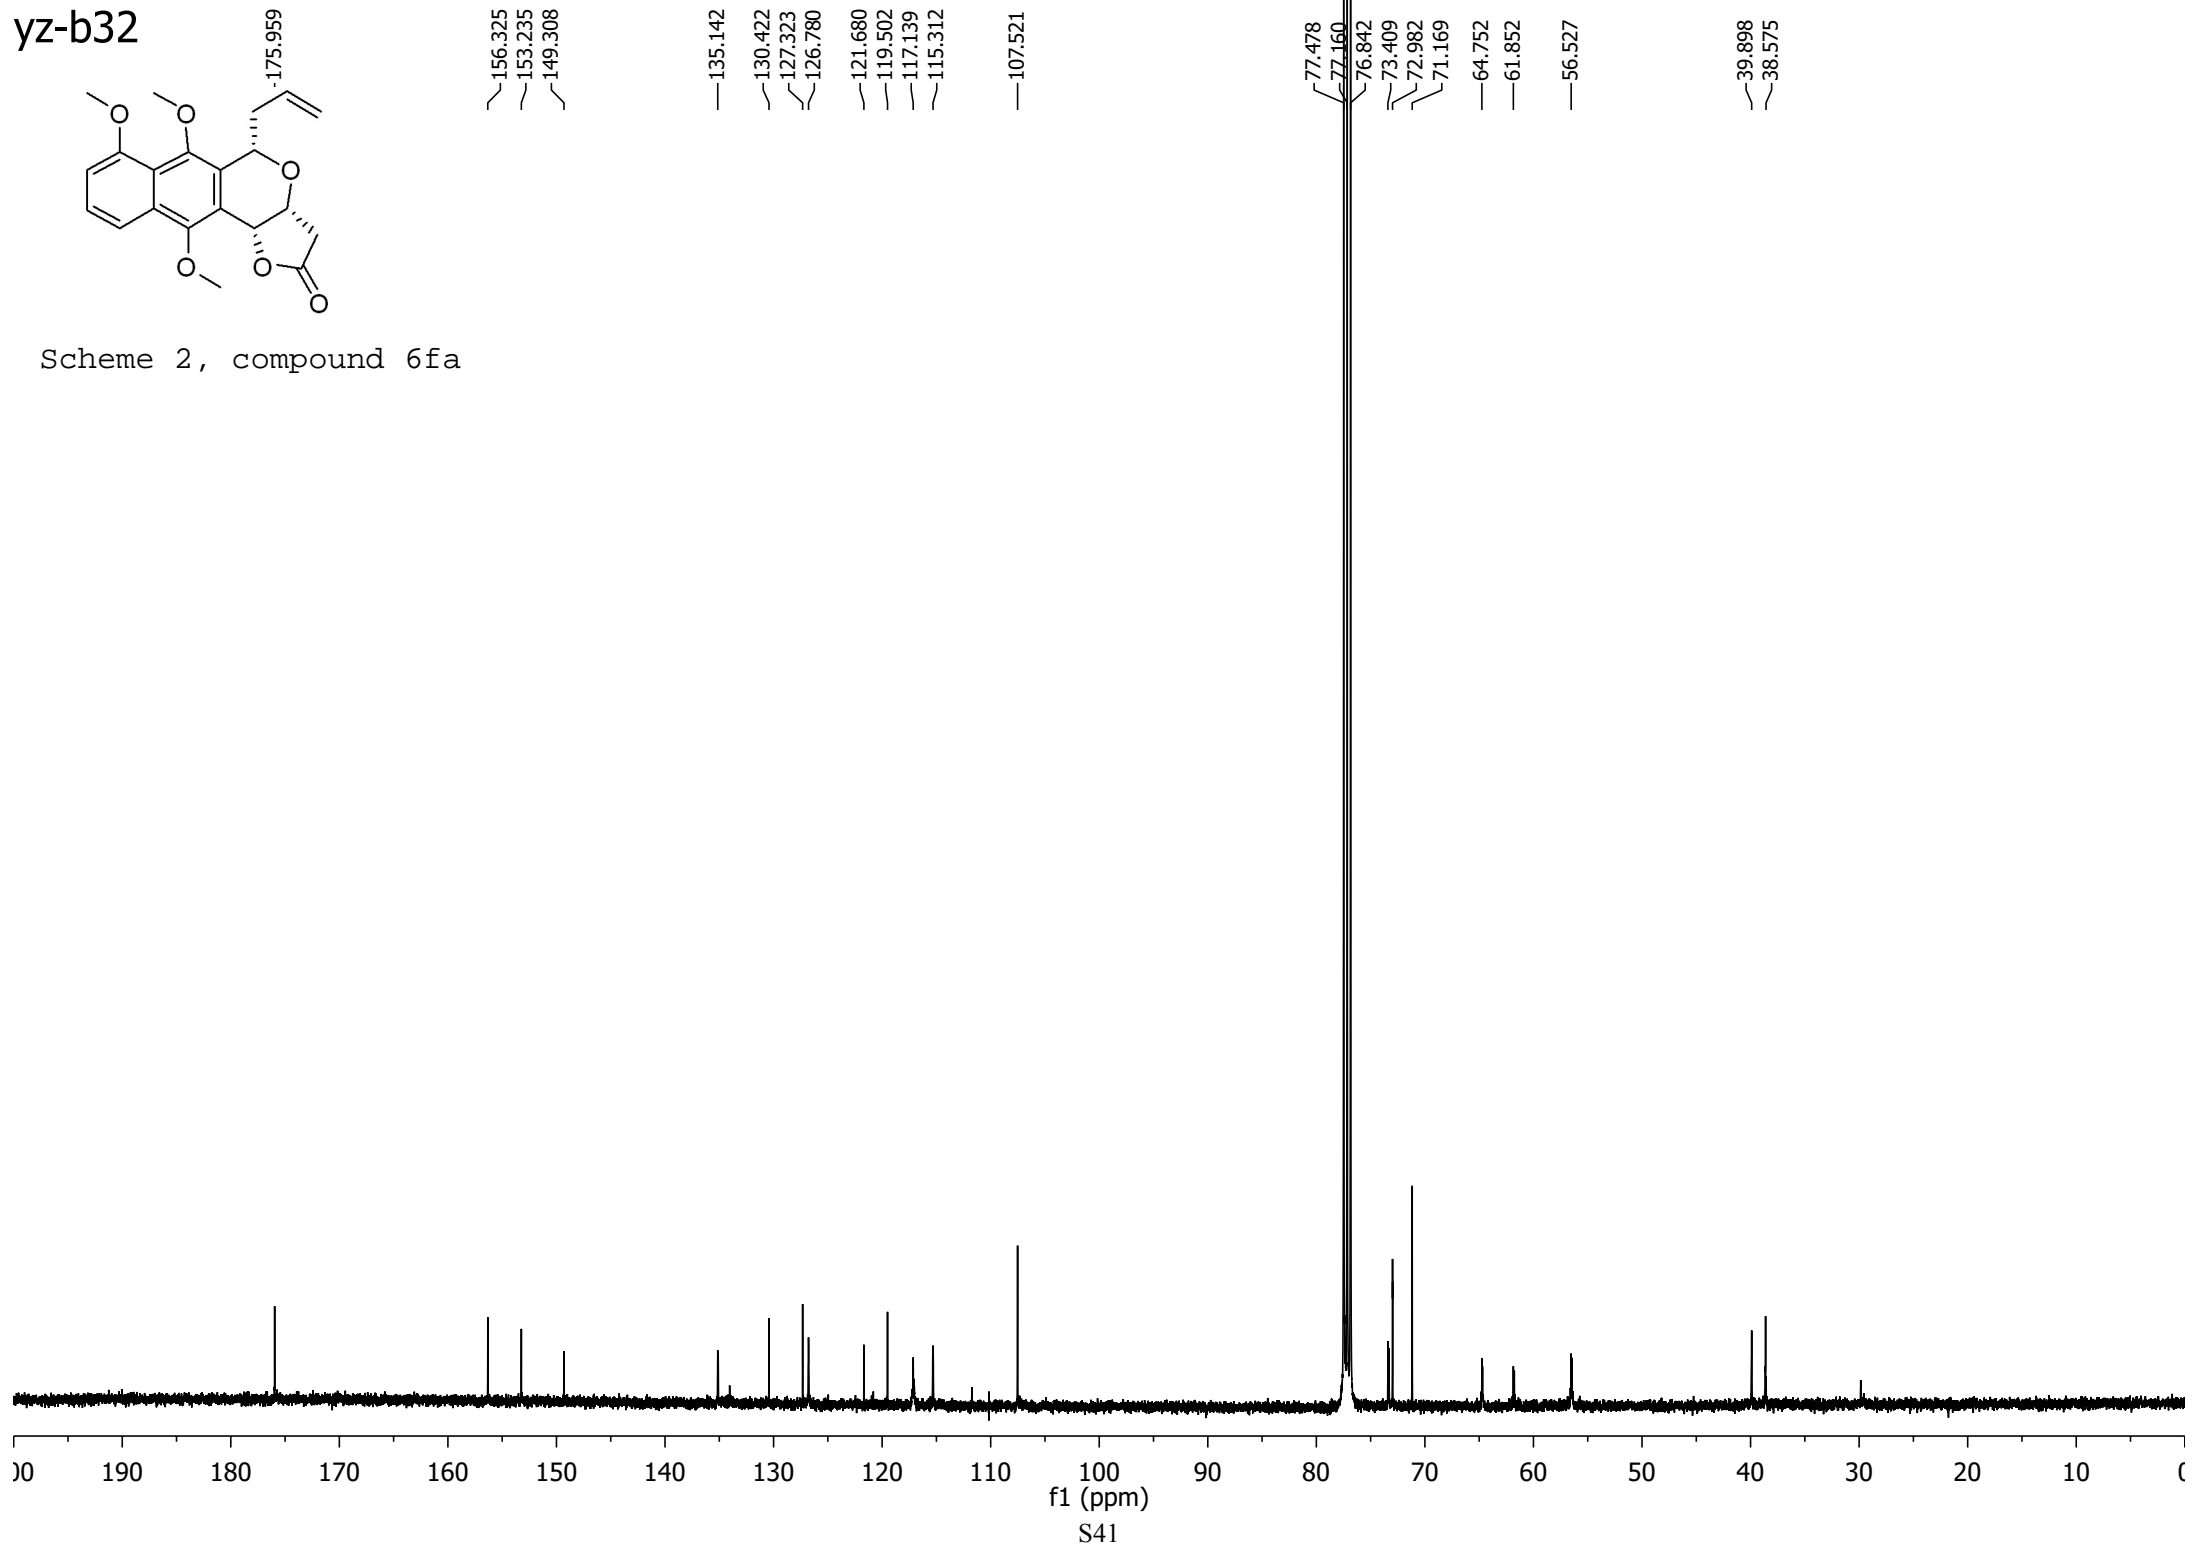

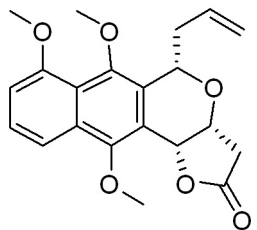

Scheme 2, compound 6fa

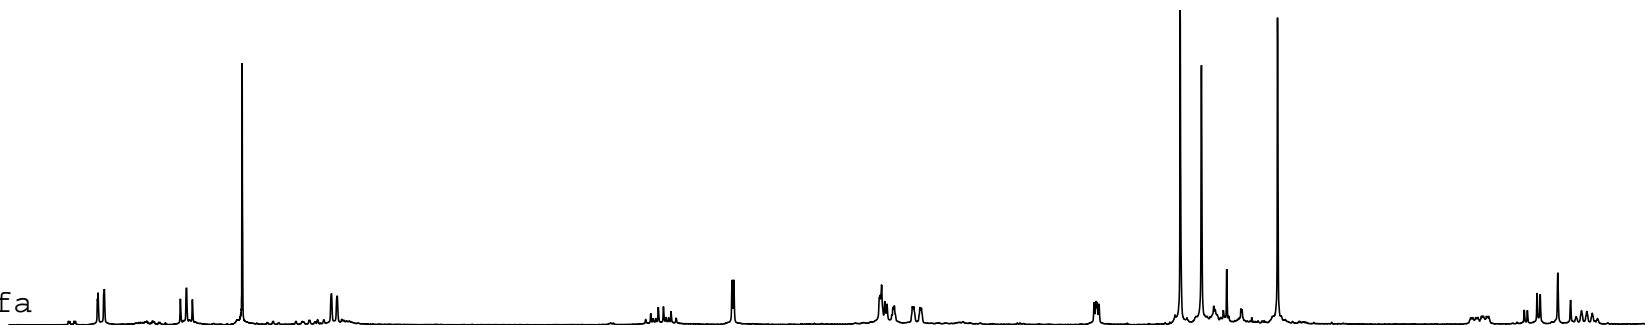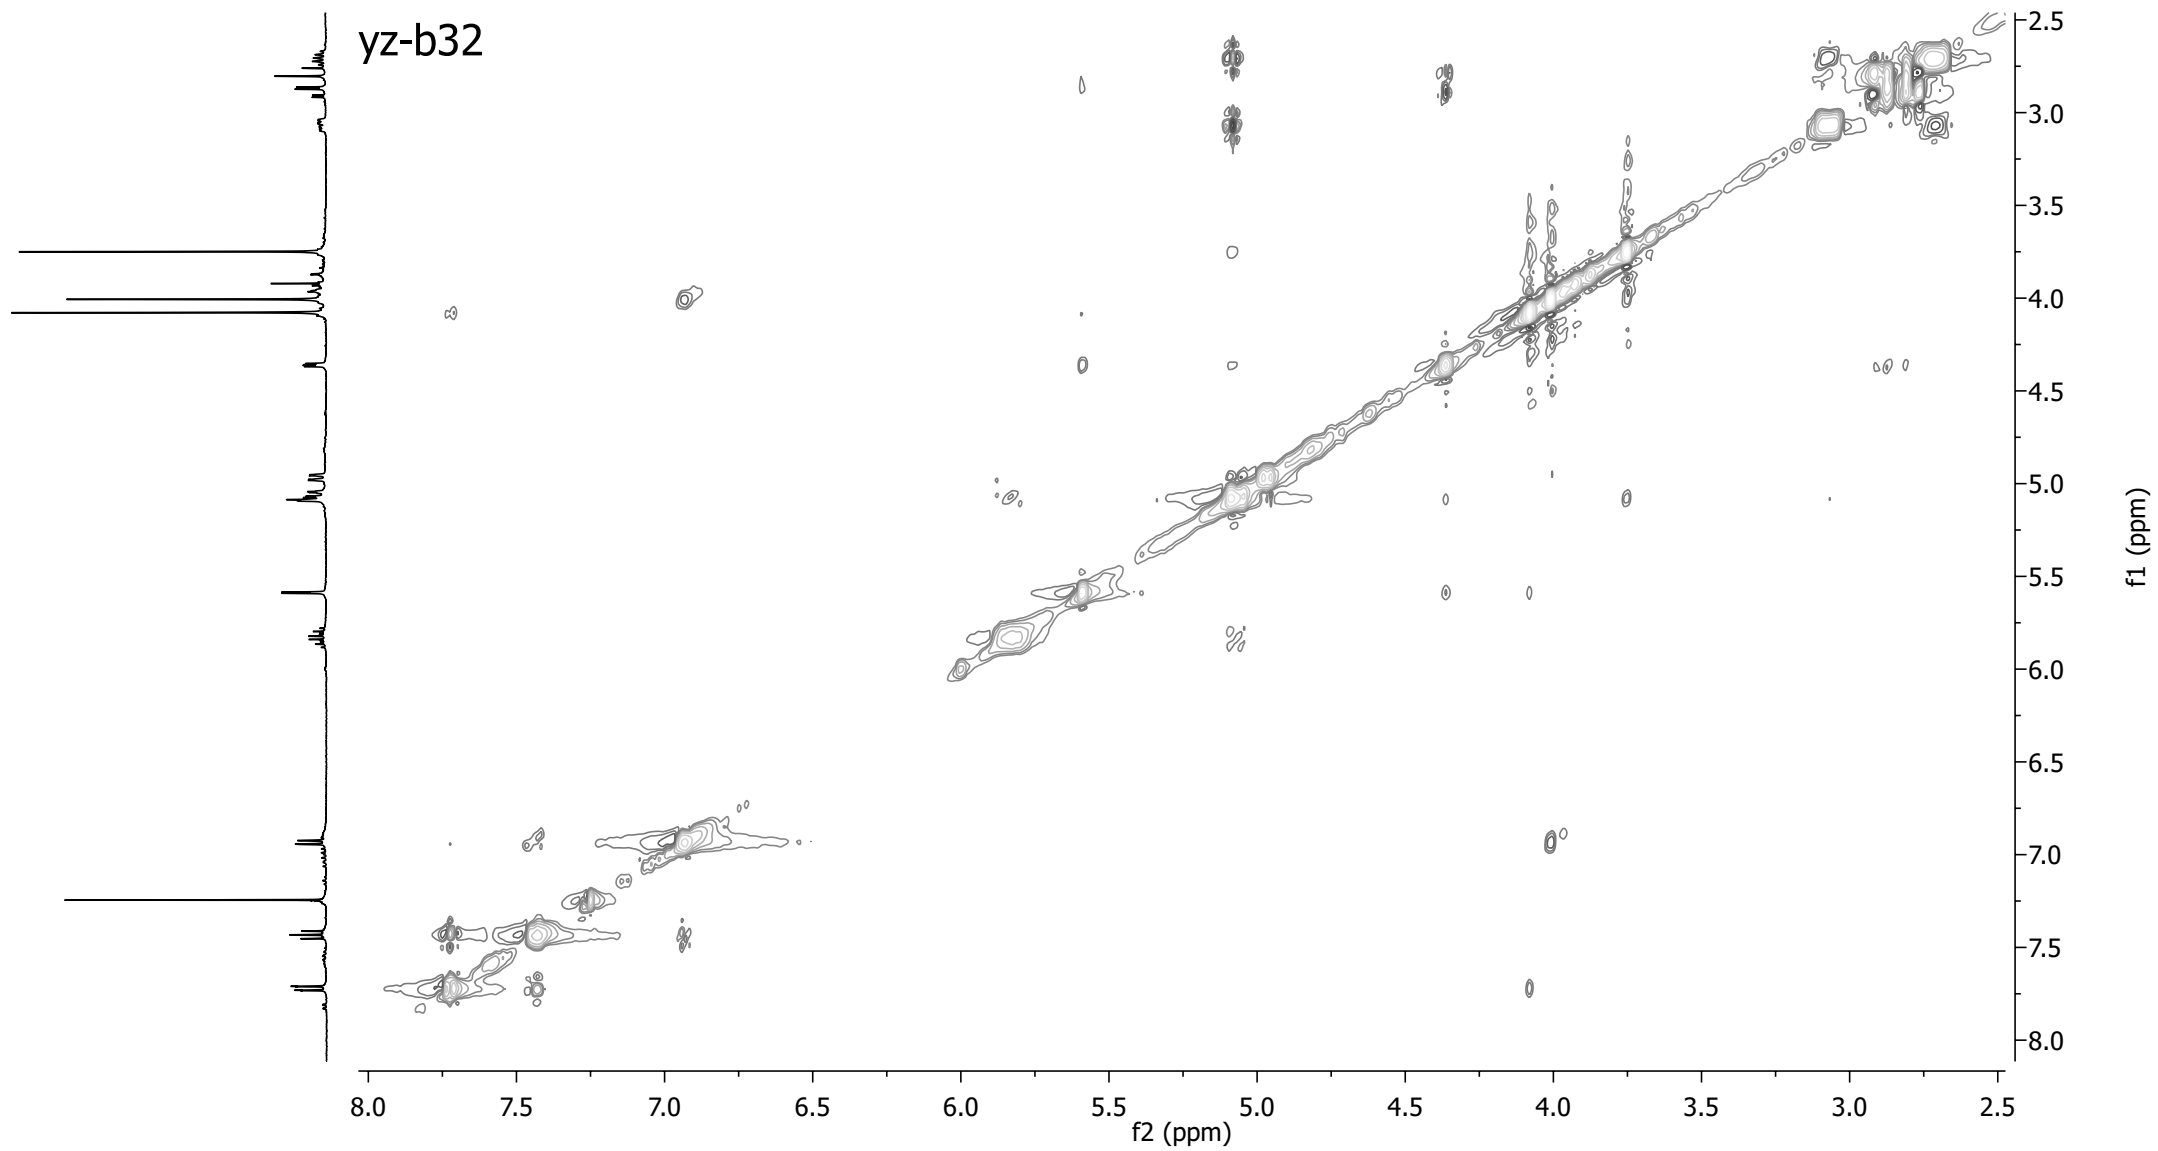

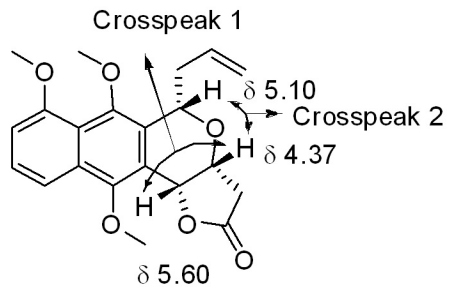

Scheme 2, compound 6fa

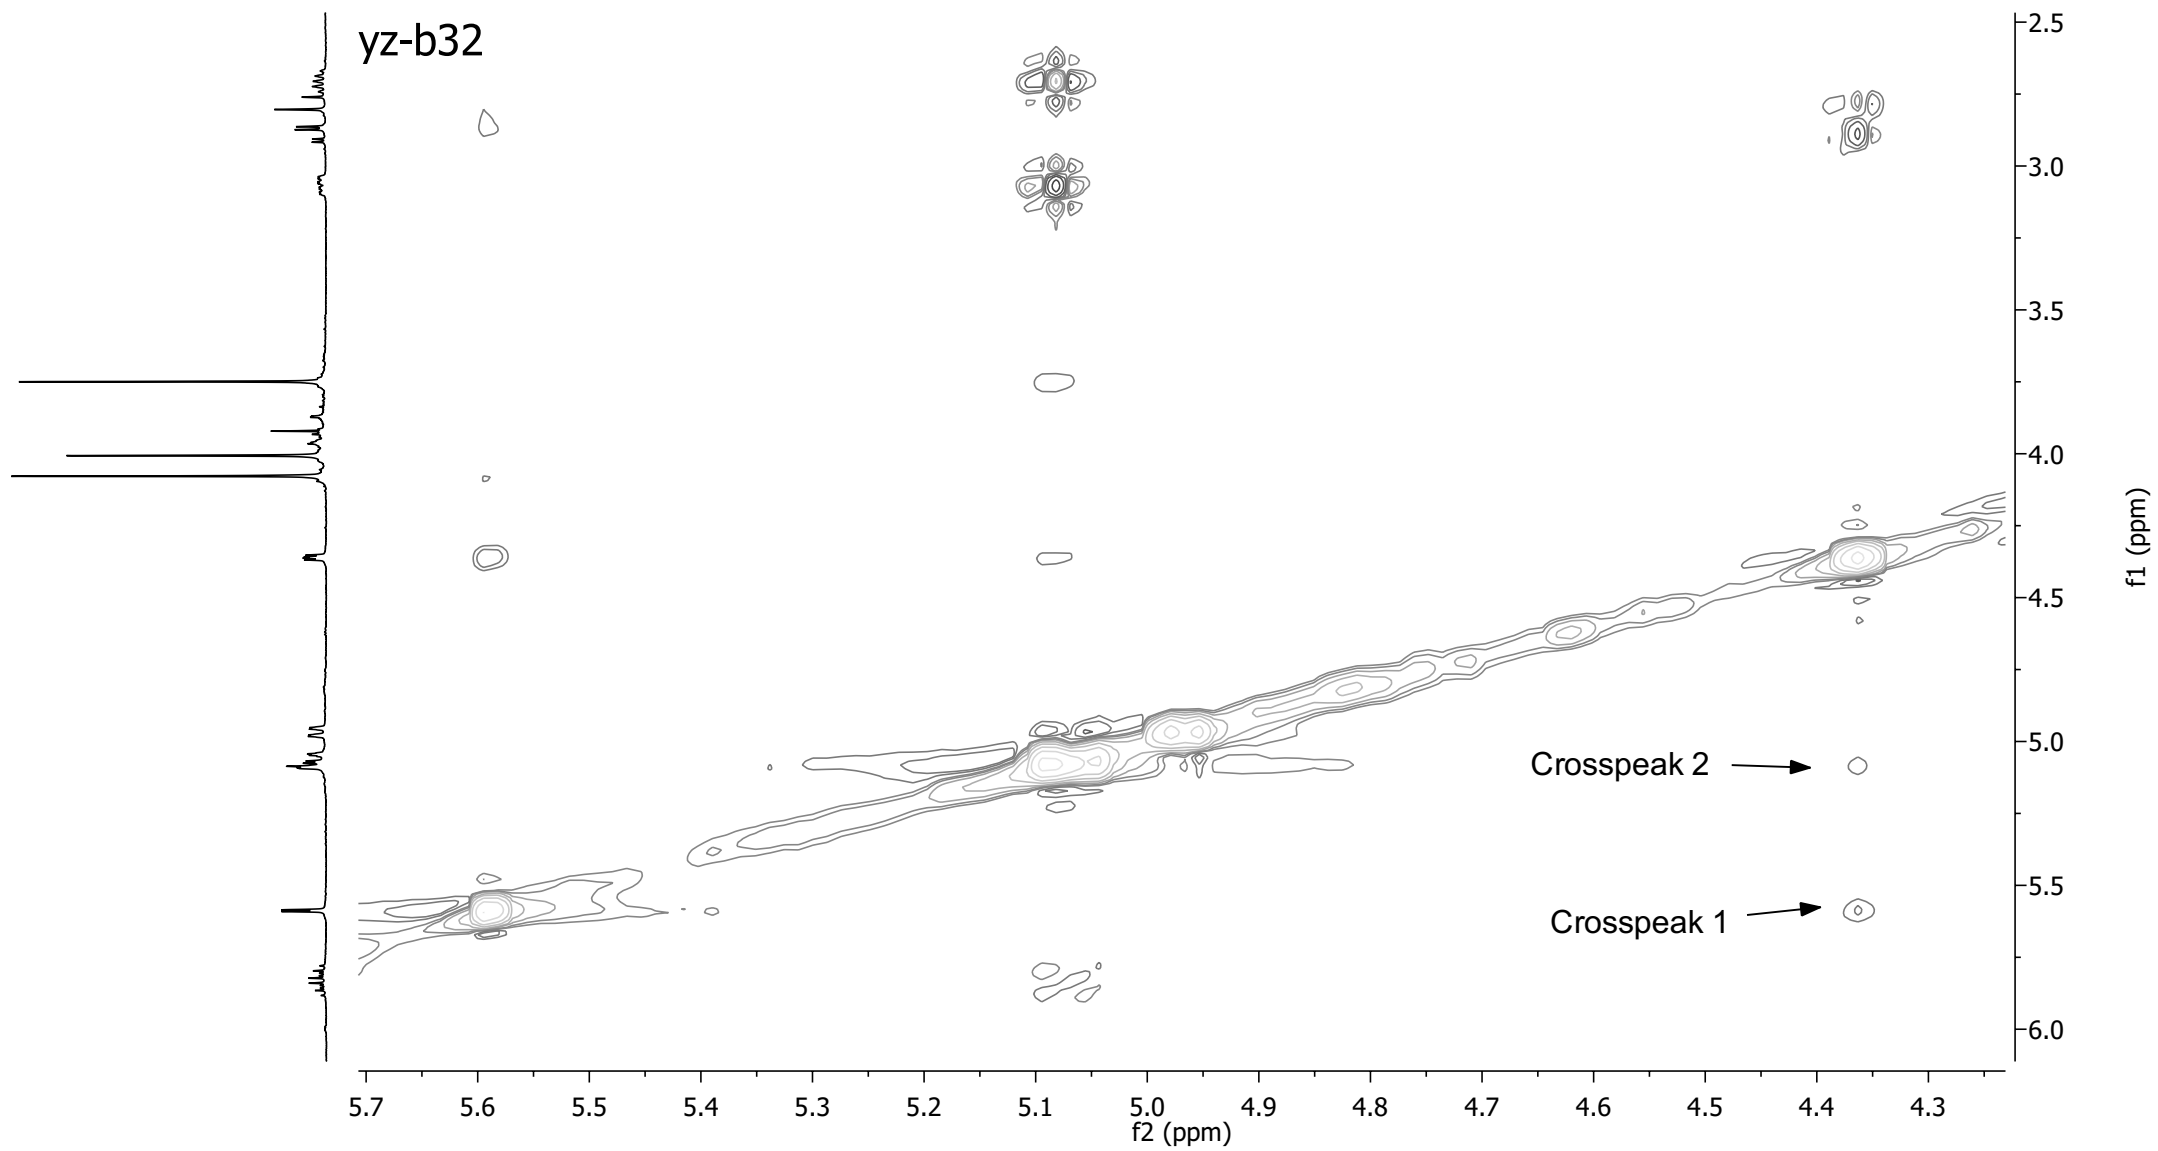

yz-b22

7.735  
7.713  
7.446  
7.426  
7.406  
7.260  
6.938  
6.918

5.568

4.973

4.307  
4.081  
4.004

3.736

2.908  
2.897  
2.865  
2.856  
2.777  
2.734

1.243  
1.143  
1.125  
0.990  
0.975  
0.959  
0.853  
0.542  
0.525

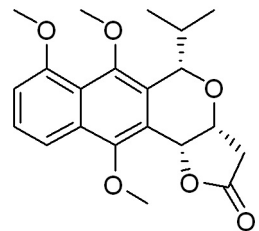

scheme 2, compound 6g

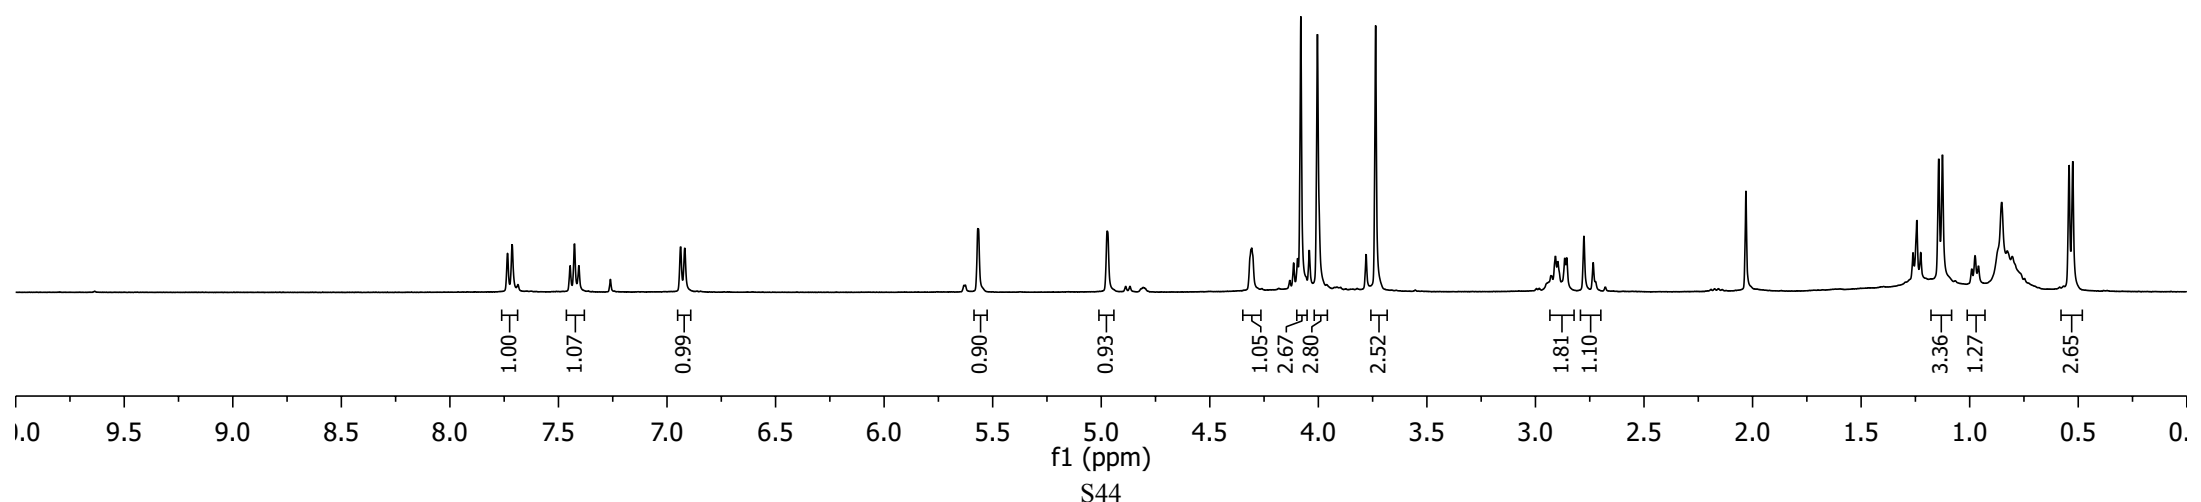

yz-b22

—176.197

~156.198  
~153.071  
~149.273

~130.201  
~127.761  
~126.596

~121.560  
~119.895  
—115.175

—107.203

77.480  
77.160  
77.059  
76.844  
73.139  
70.607  
—64.713  
—61.752  
—56.263

—38.517

—32.150

—20.311

—15.316

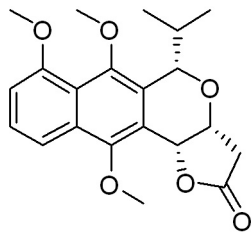

Scheme 2, compound 6g

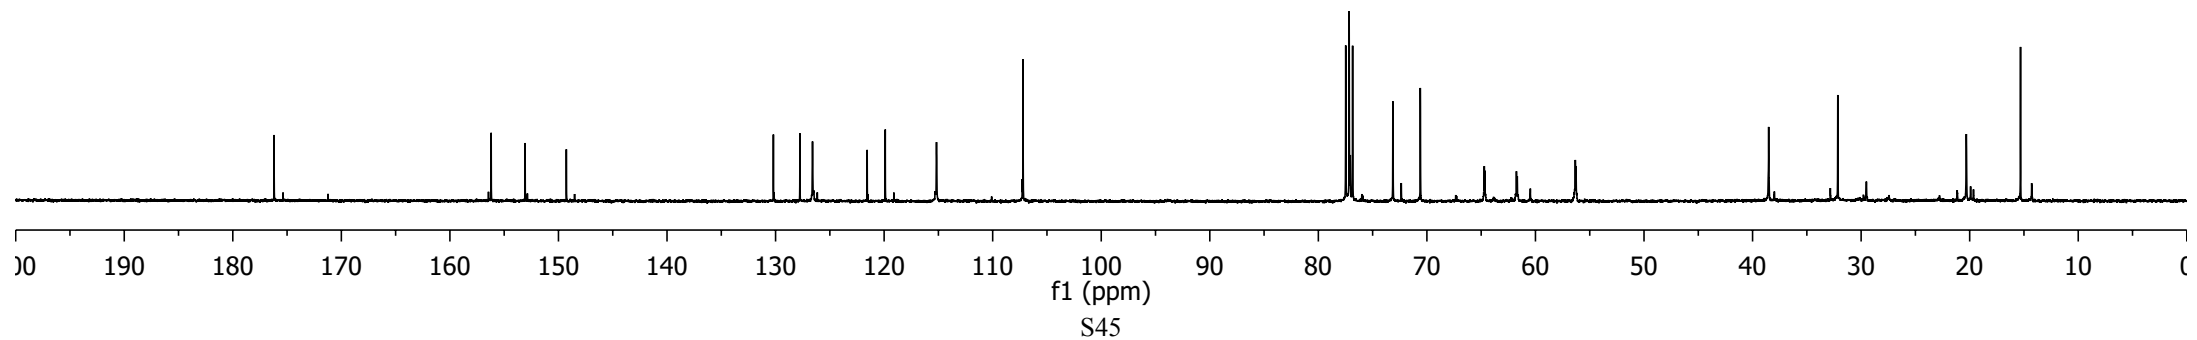

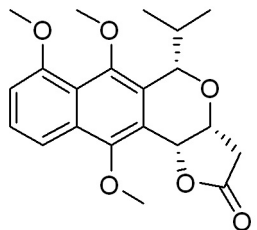

Scheme 2, compound 6g

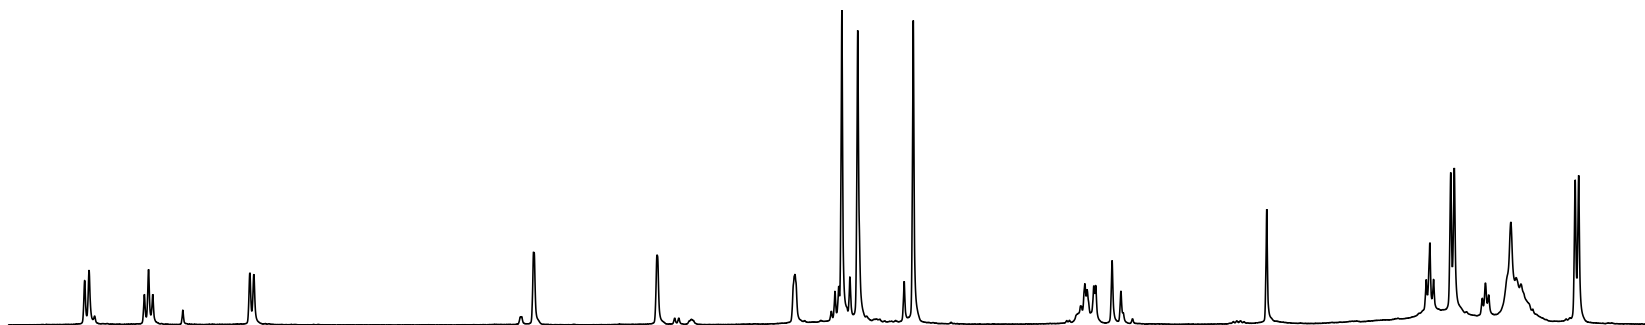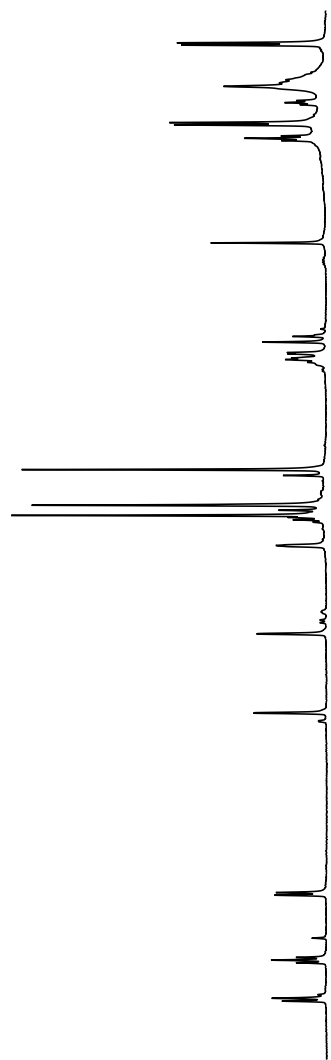

yz-b22

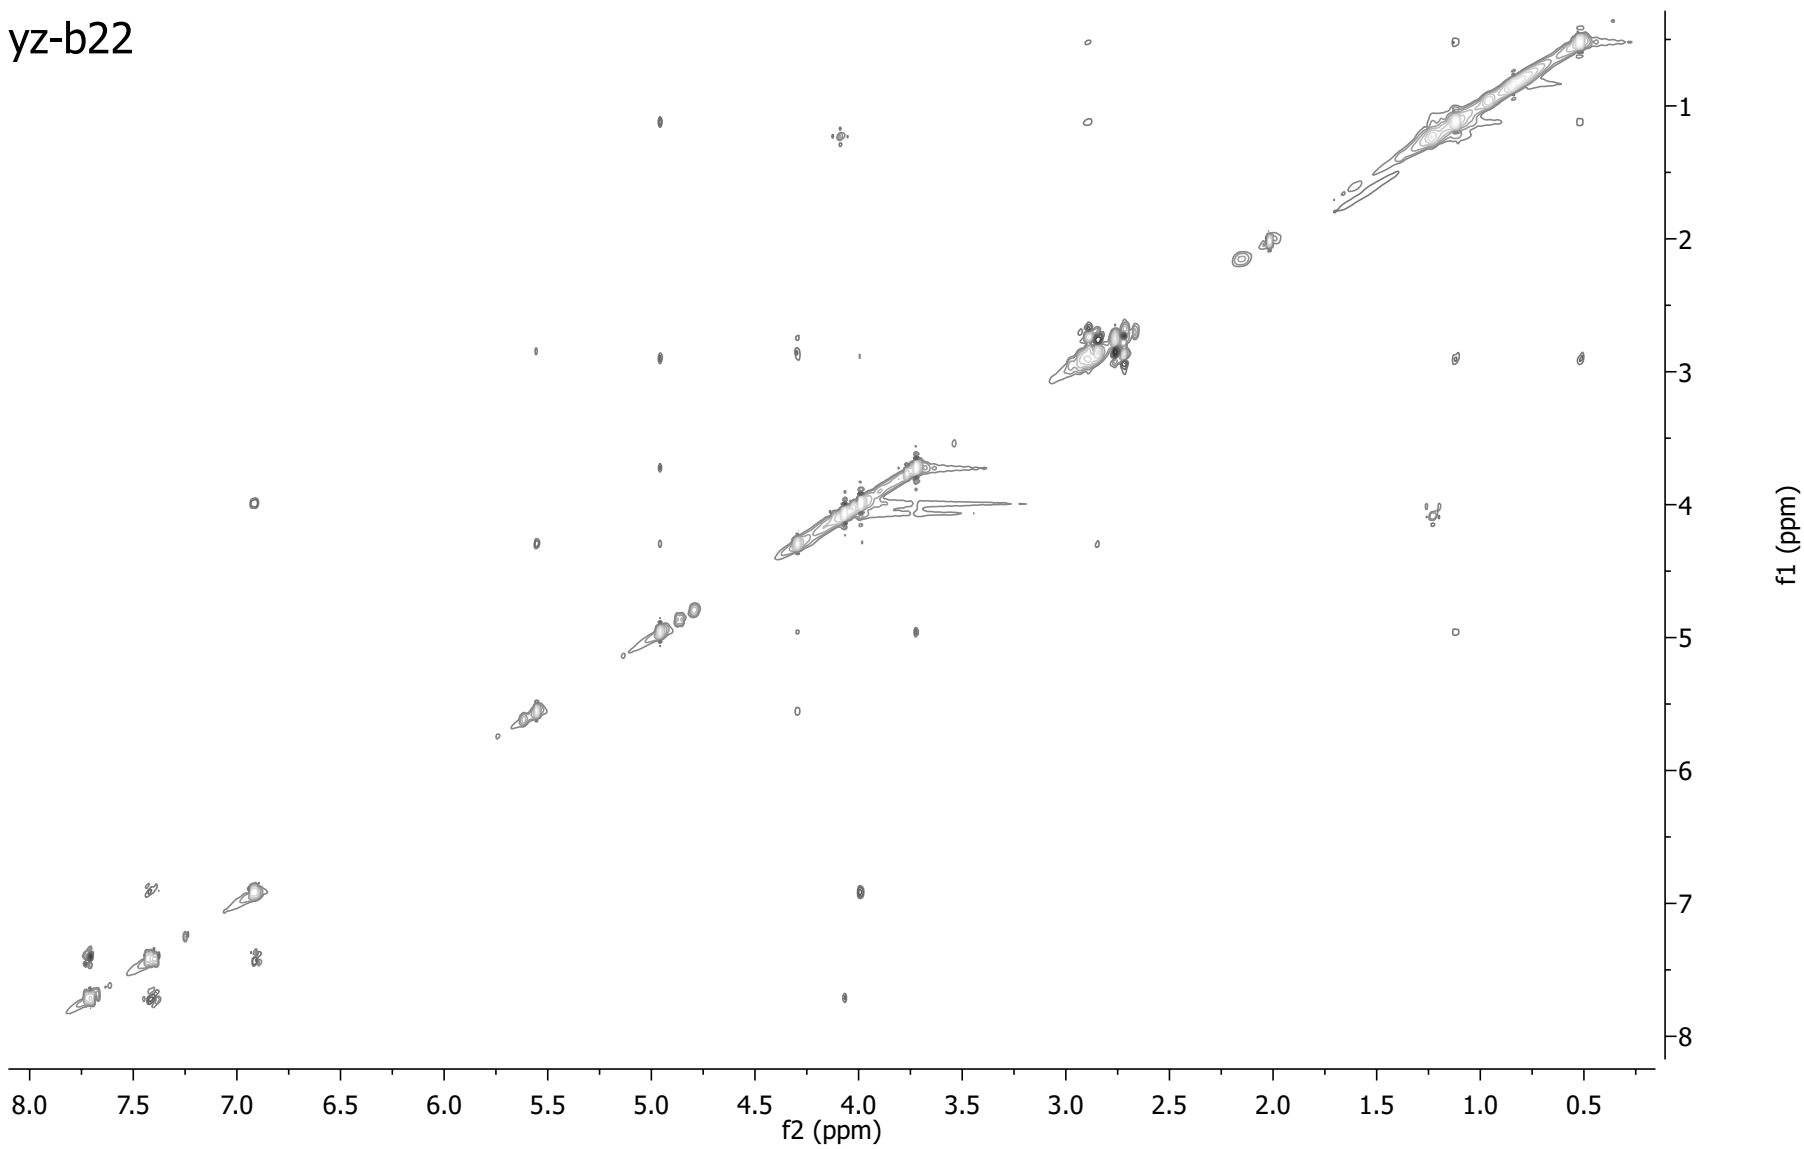

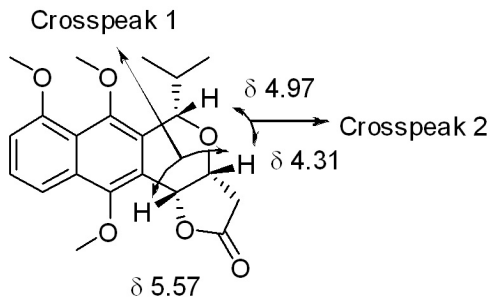

Scheme 2, compound 6g

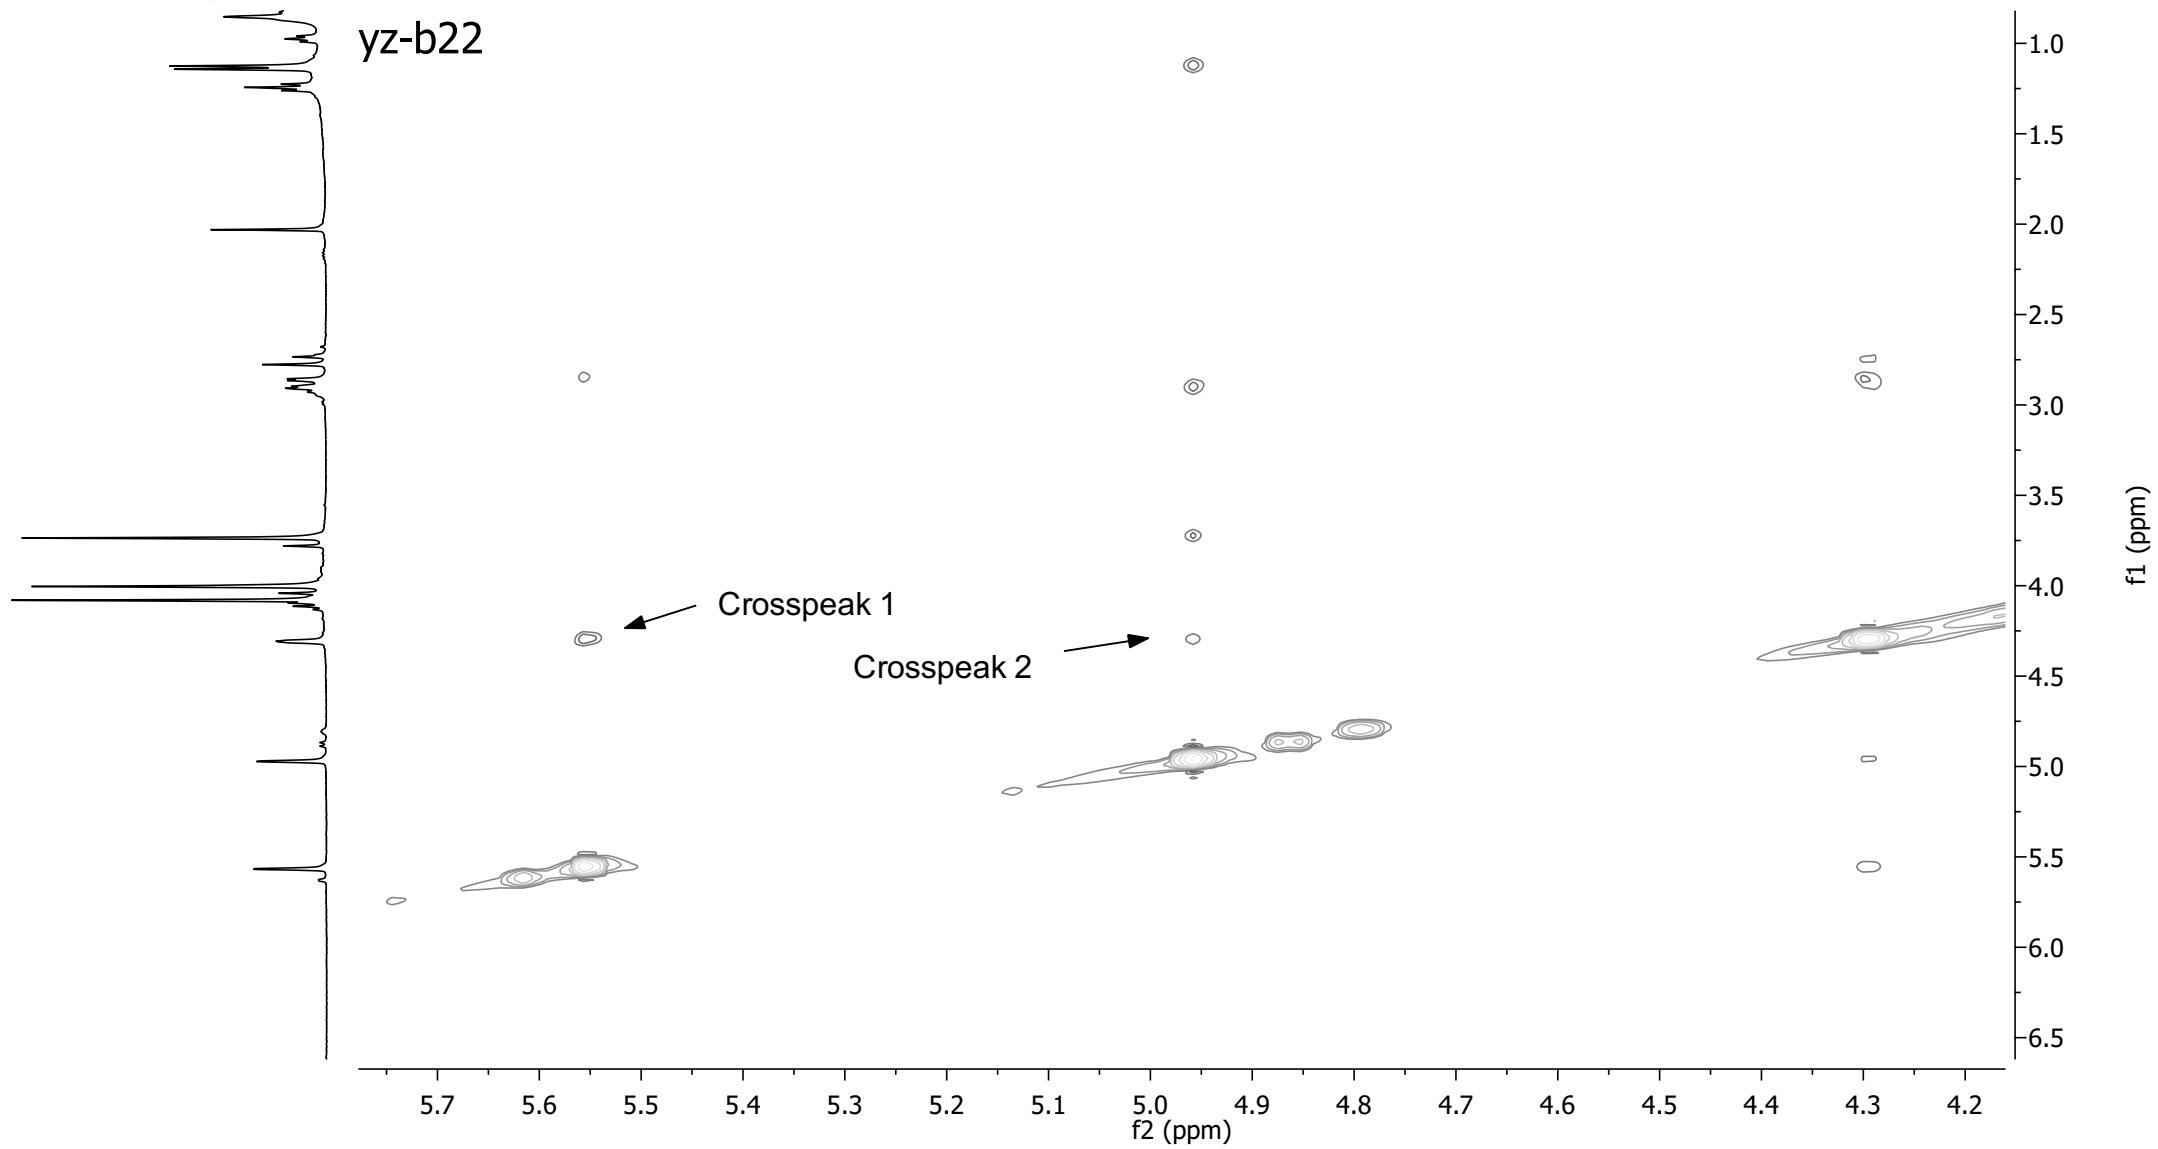

yz-a68

7.739  
7.737  
7.718  
7.716  
7.467  
7.447  
7.427  
7.260  
6.955  
6.936

5.584  
5.578  
5.290  
5.098  
5.091  
5.081  
5.074

4.361  
4.356  
4.351  
4.346  
4.087  
4.013

— 3.744

3.250  
3.233

2.935  
2.892  
2.882  
2.791  
2.748

2.330  
2.307  
2.174  
2.133  
2.115  
2.038  
1.727  
1.676  
1.631  
1.600

— 1.251

— 0.856

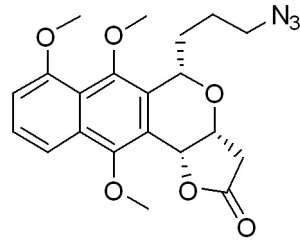

Scheme 2, compound 6h

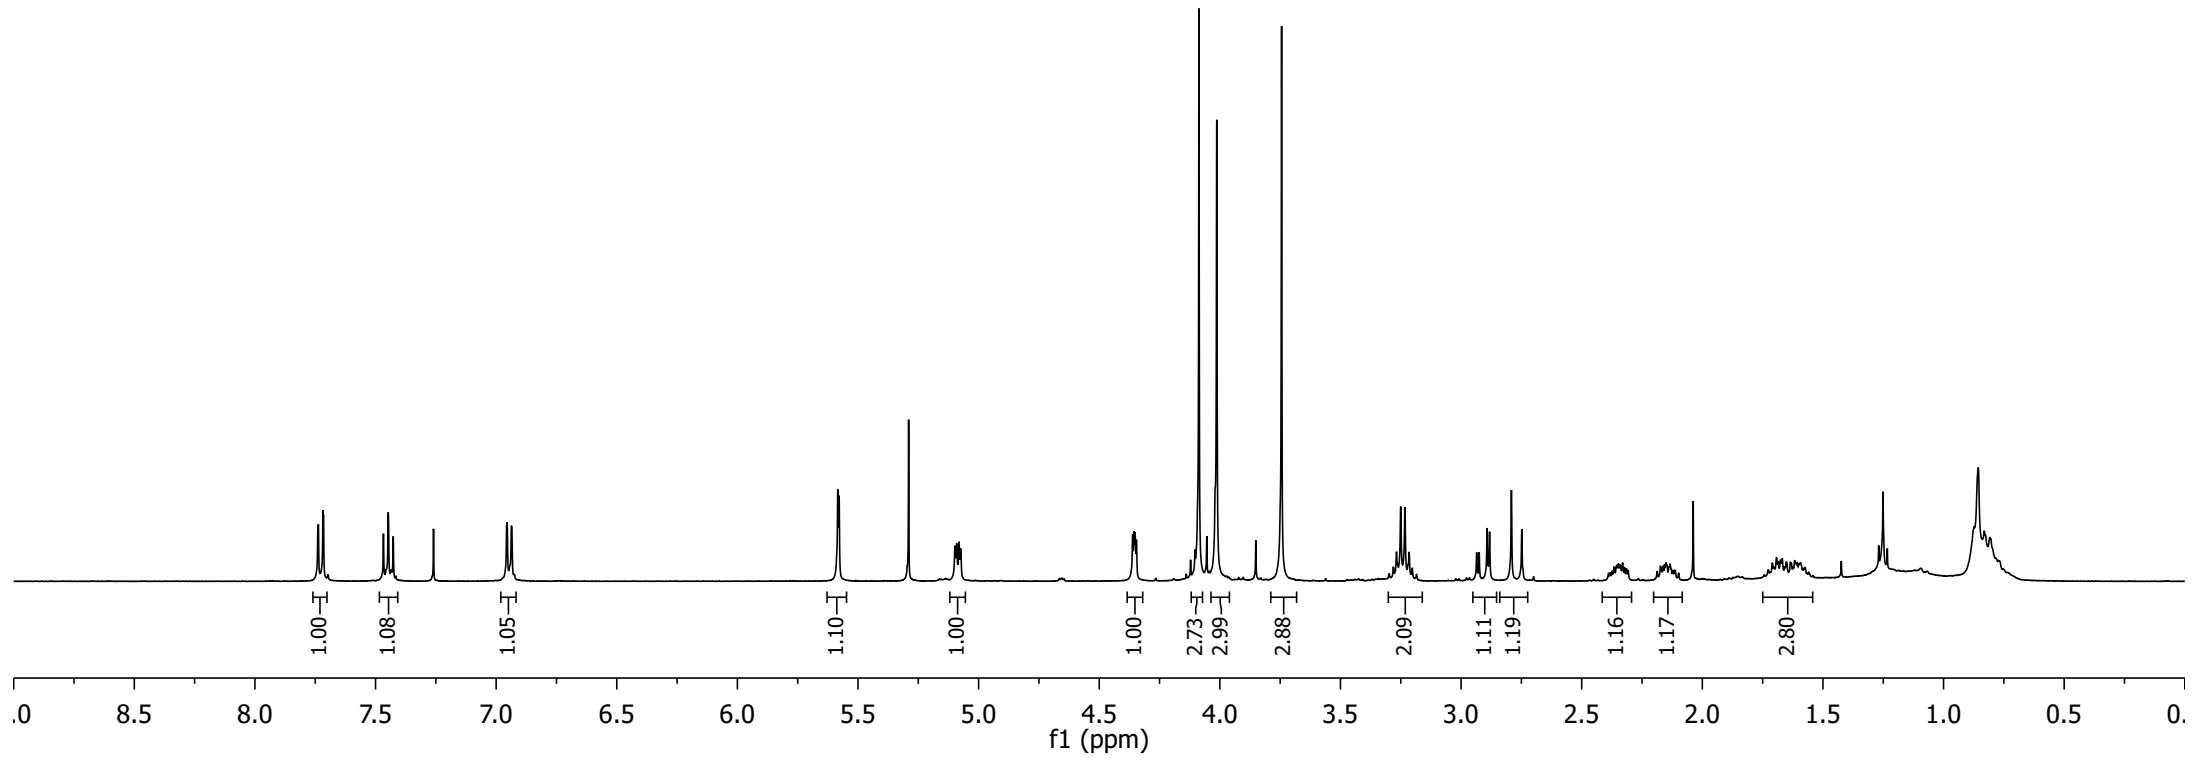



yz-a68

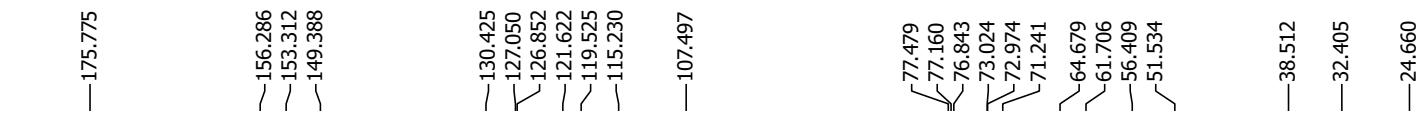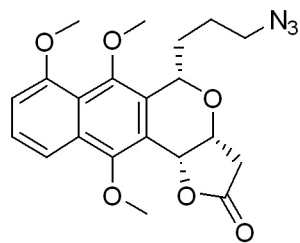

Scheme 2, compound 6h

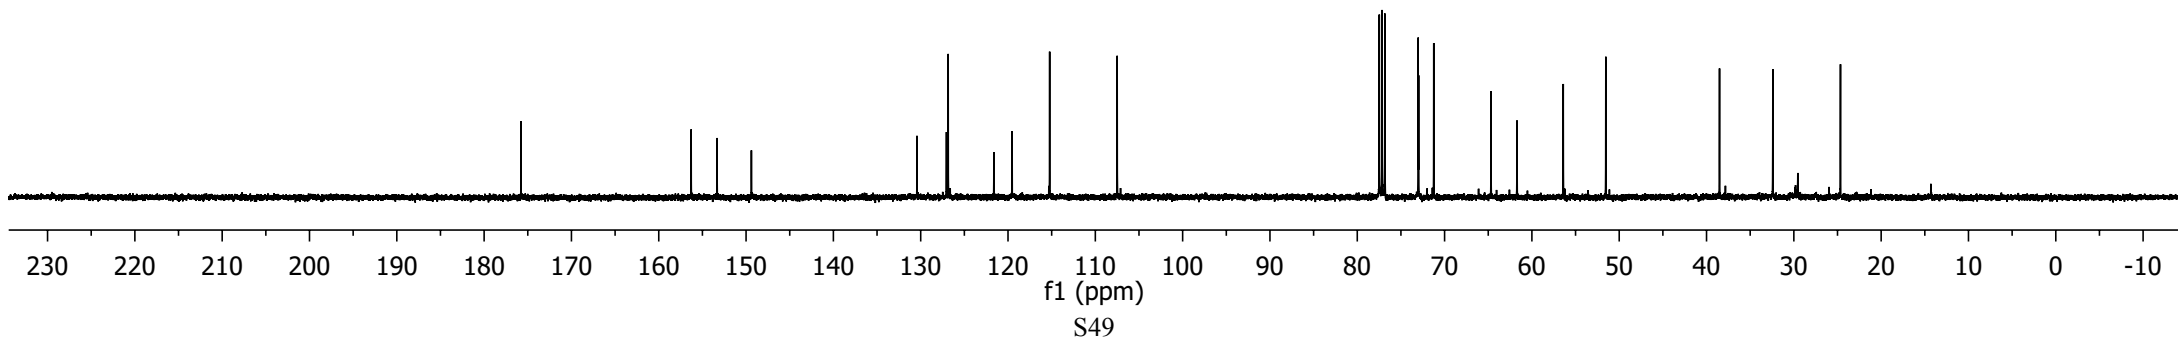

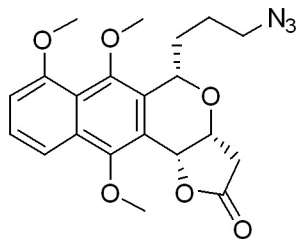

Scheme 2, compound 6h

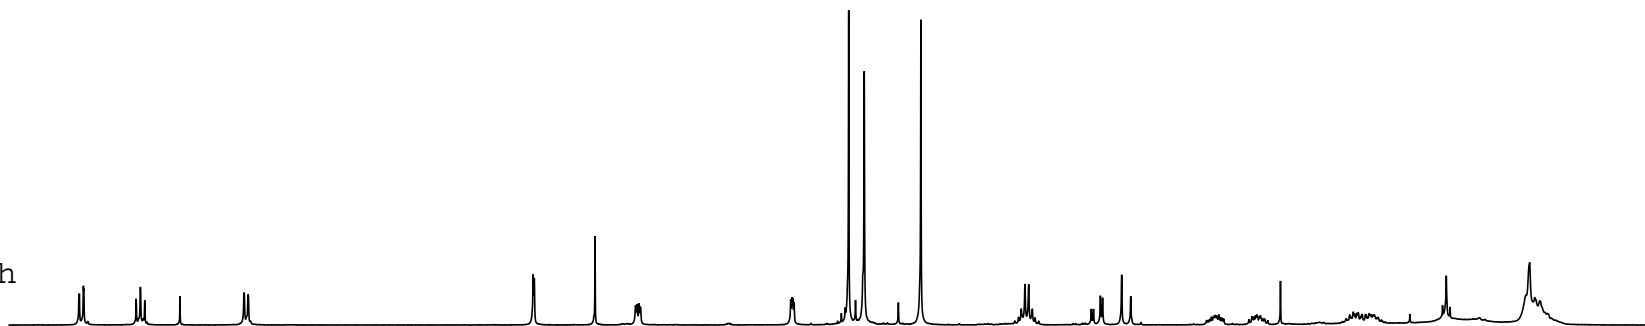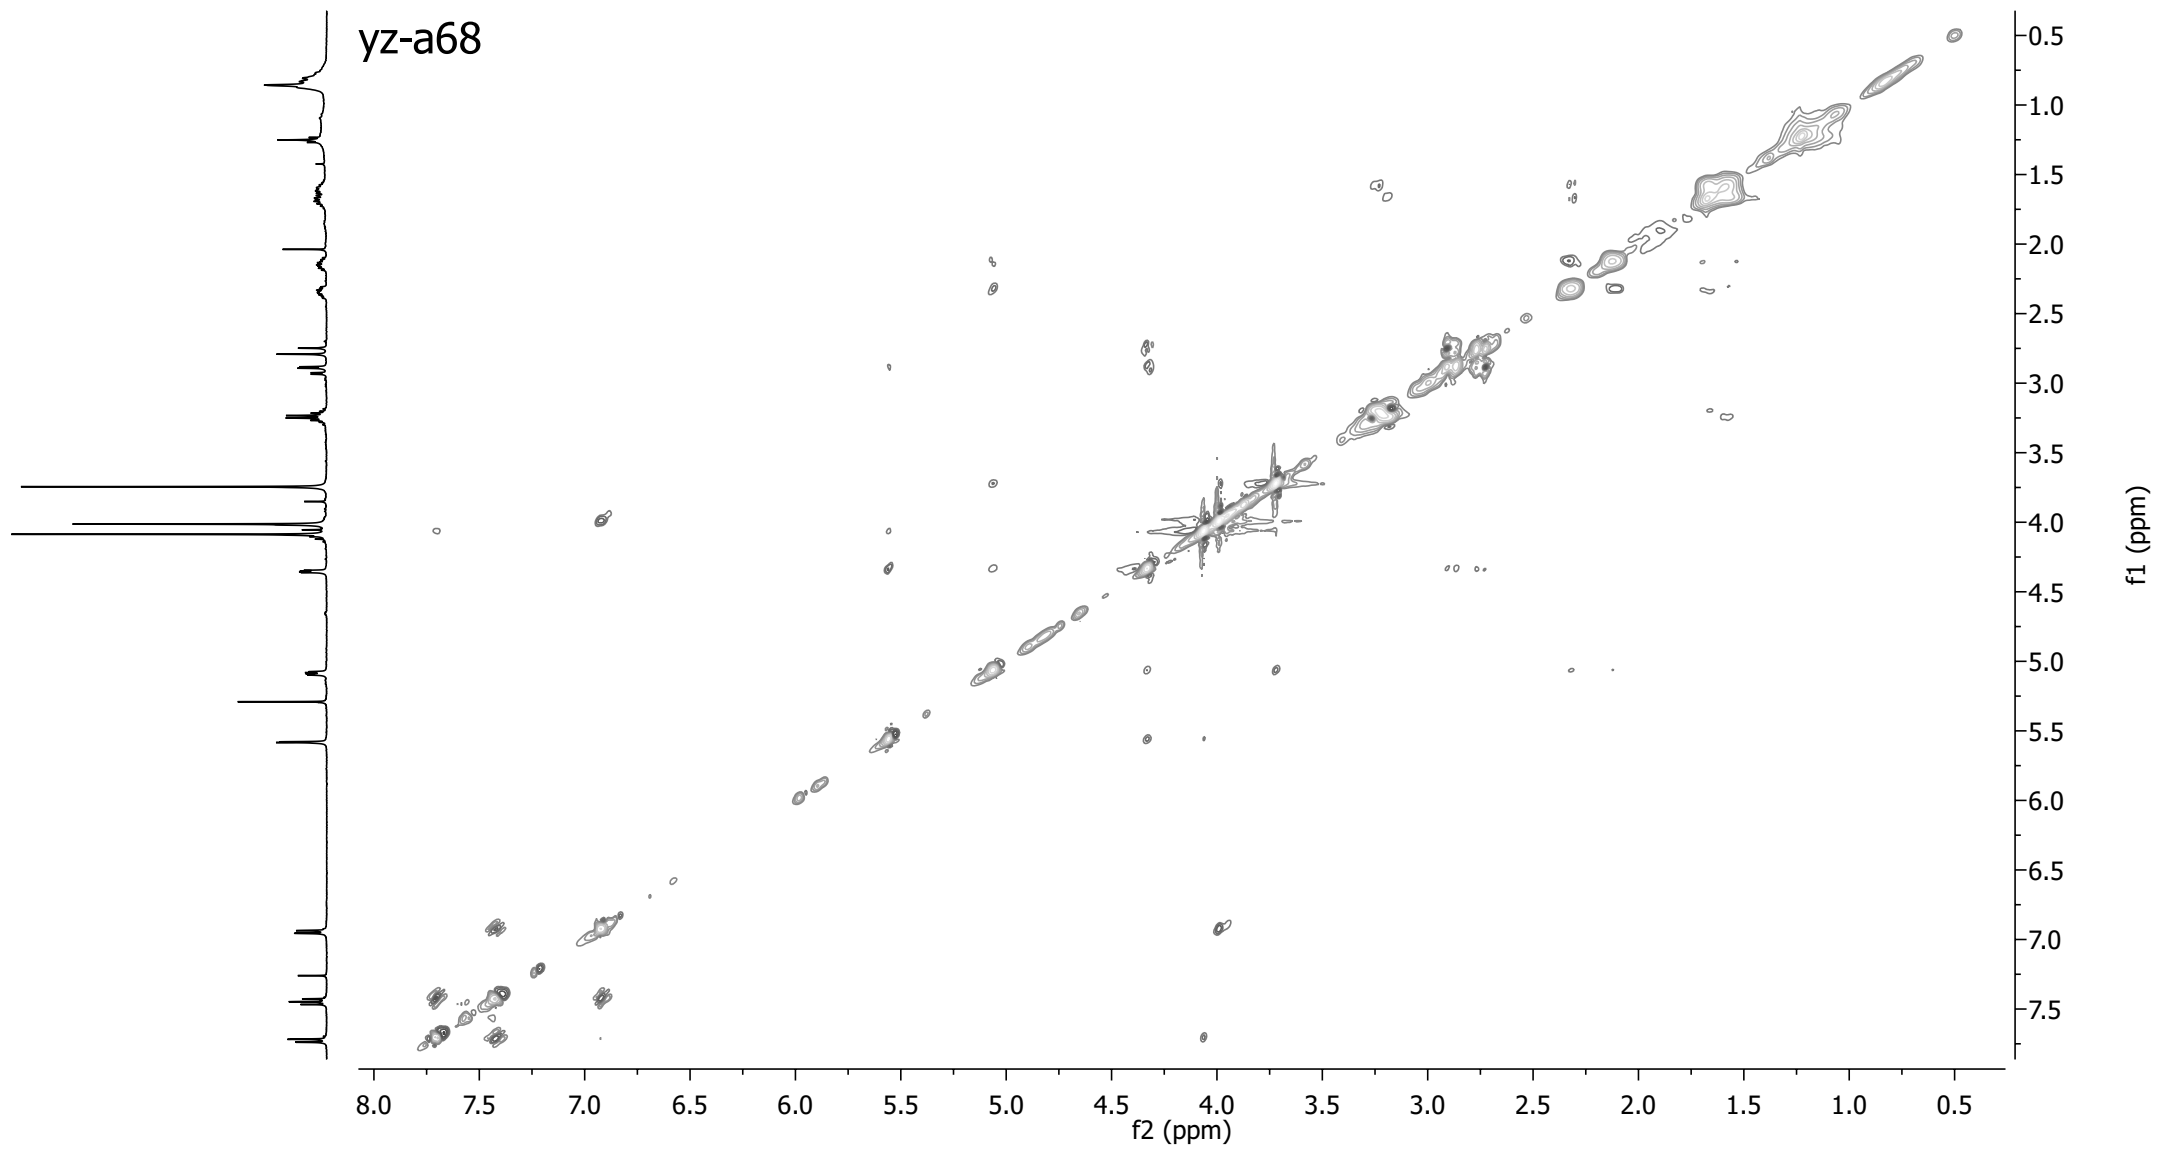

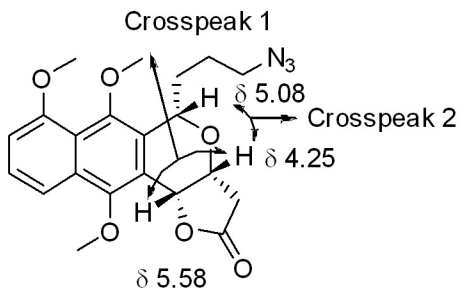

Scheme 2, compound 6h

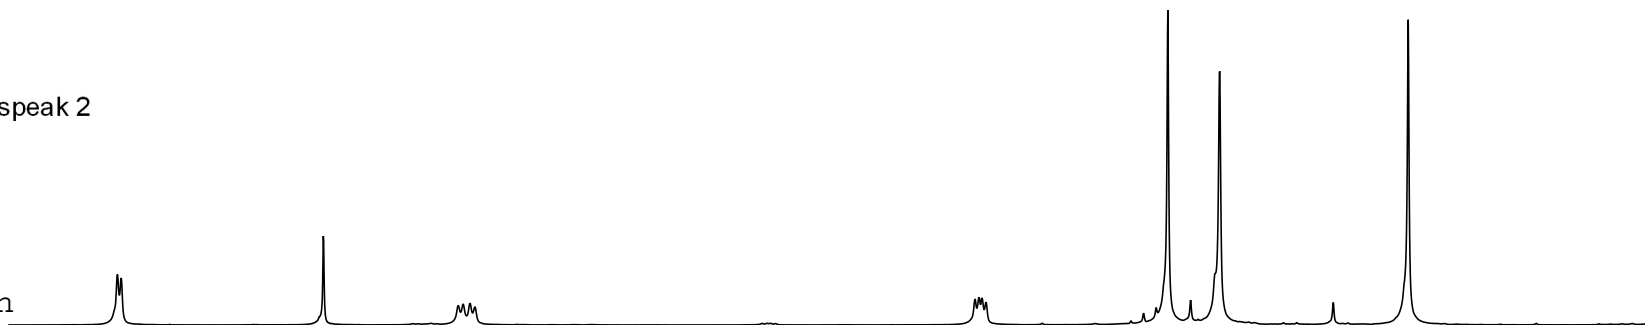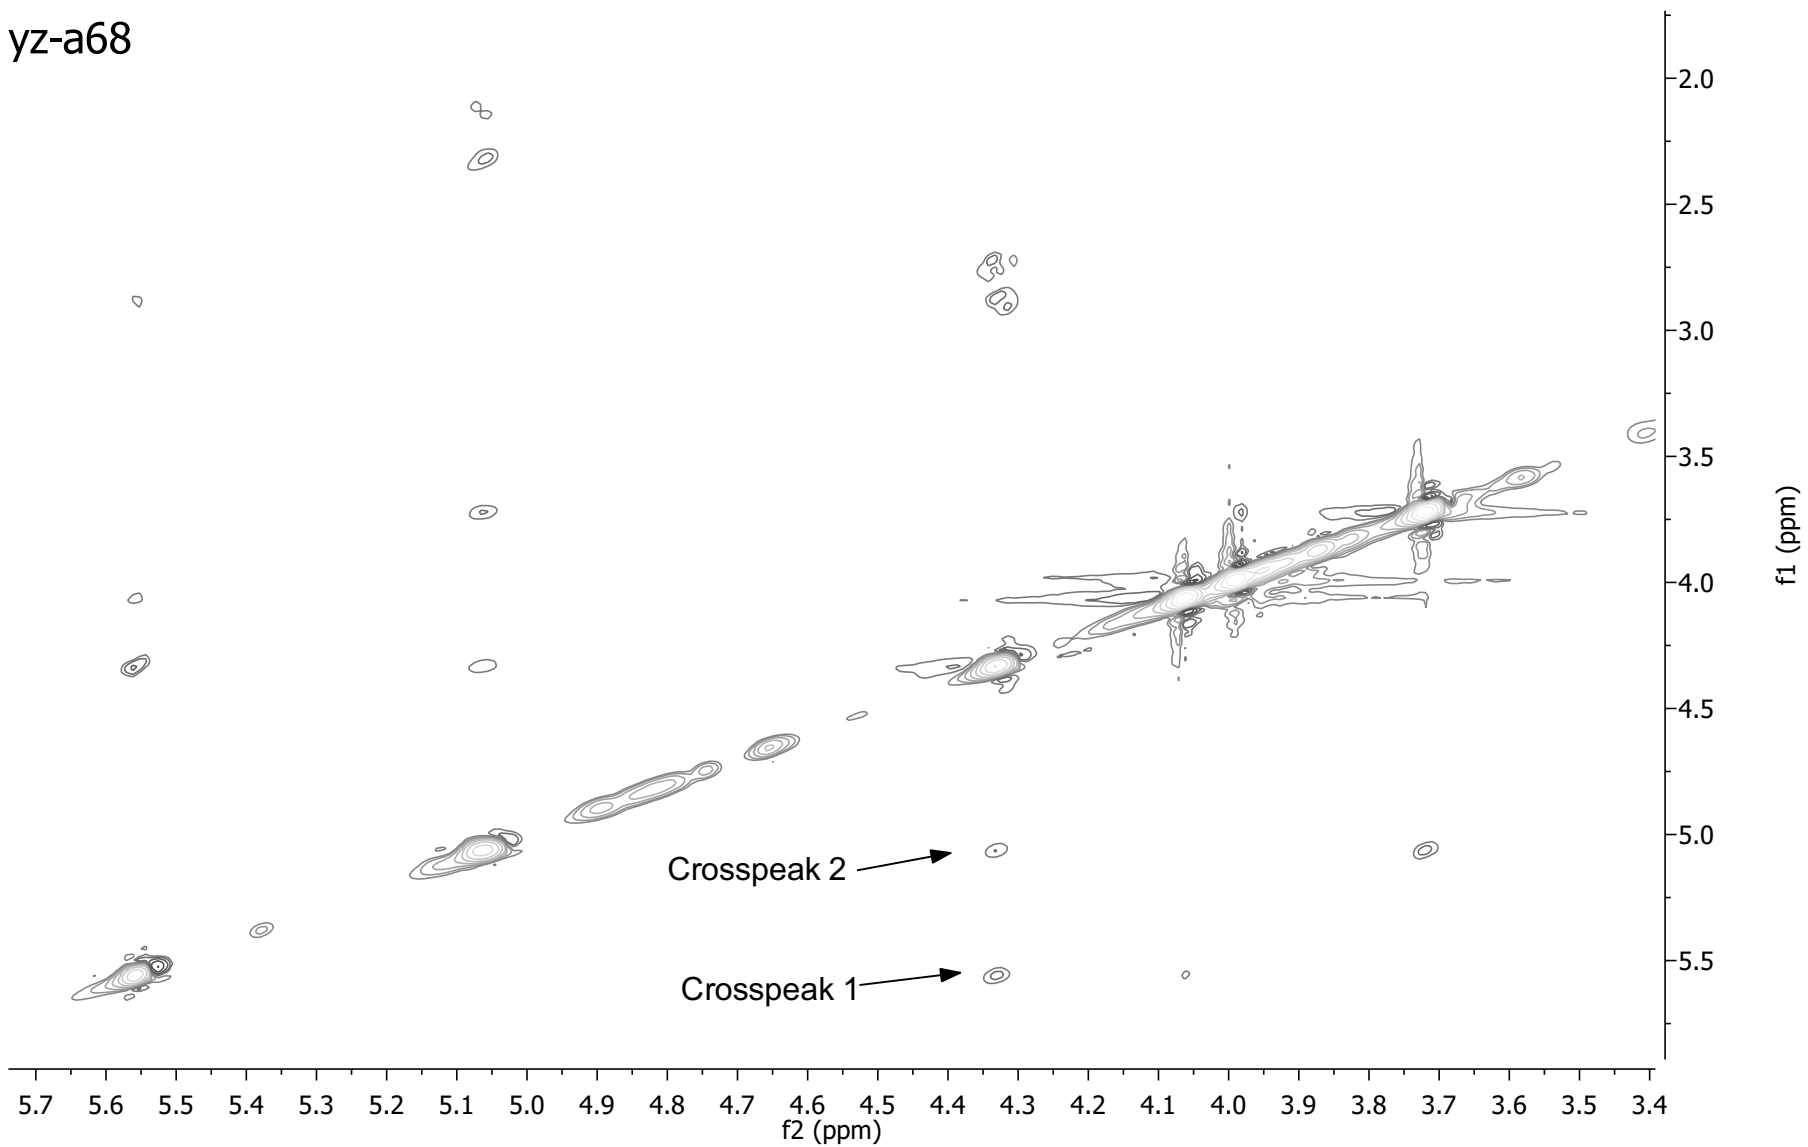

yz-b52

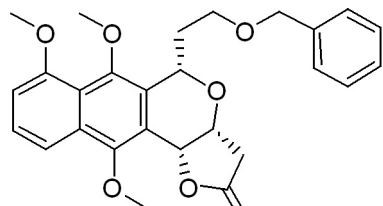

Scheme 2, compound 6i

7.733  
7.713  
7.290  
7.279  
7.261  
7.060  
6.982  
6.933

5.587  
5.582  
5.232  
5.226  
5.211  
5.205

4.562  
4.532  
4.481  
4.451  
4.344  
4.339

4.072  
4.071  
4.011  
3.805  
3.791  
3.750  
3.556  
3.546

2.908  
2.885  
2.877  
2.866  
2.762  
2.719

2.079  
2.067  
2.046

1.578

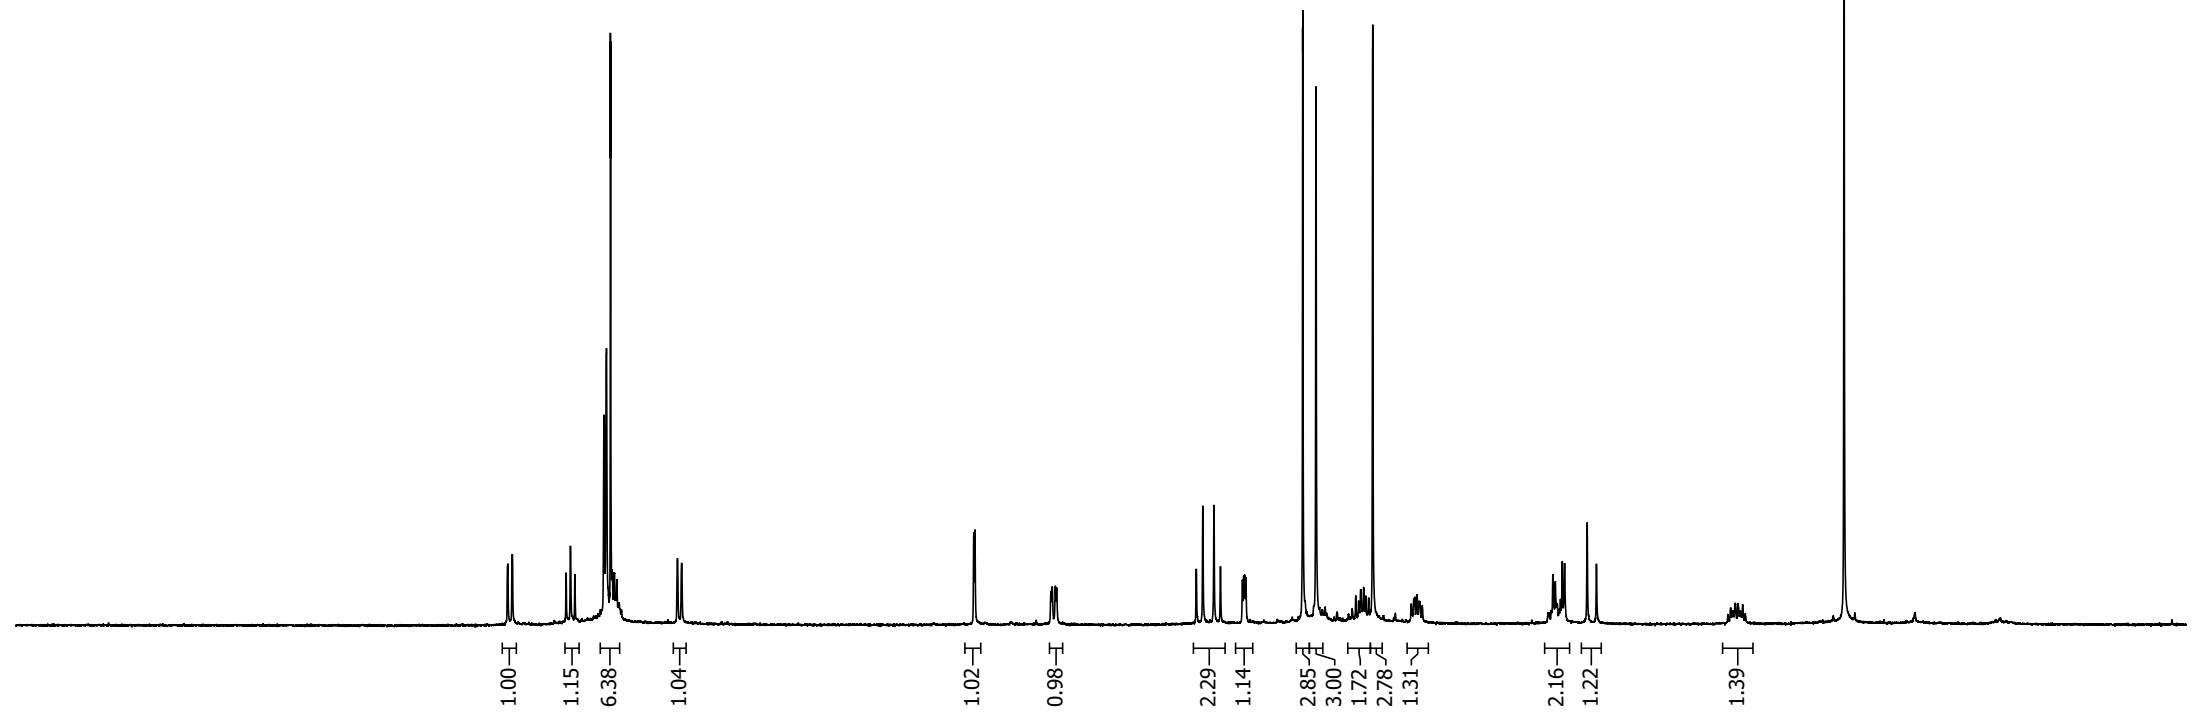

f1 (ppm)

S52

yz-b52

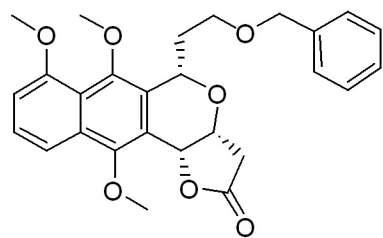

Scheme 2, compound 6i

—175.914

—156.277  
—153.177  
—149.431

—138.958  
—130.273  
—128.230  
—127.791  
—127.458  
—127.292  
—126.676  
—121.675  
—119.468  
—115.156

—107.371

77.478  
77.160  
76.842  
73.101  
72.557  
71.170  
70.556  
66.713  
64.519  
61.662  
56.320

—38.453  
—35.319

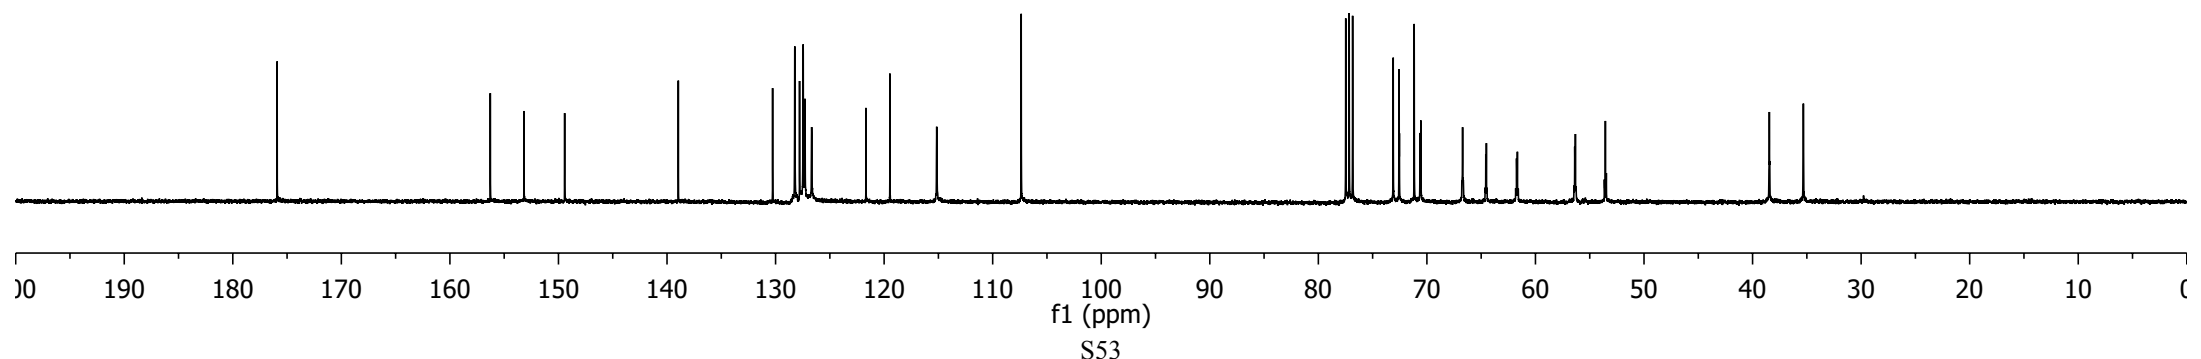

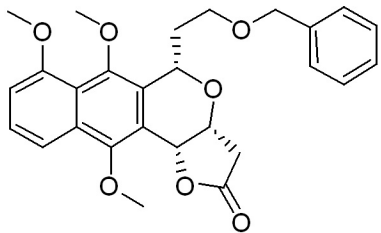

Scheme 2, compound 6i

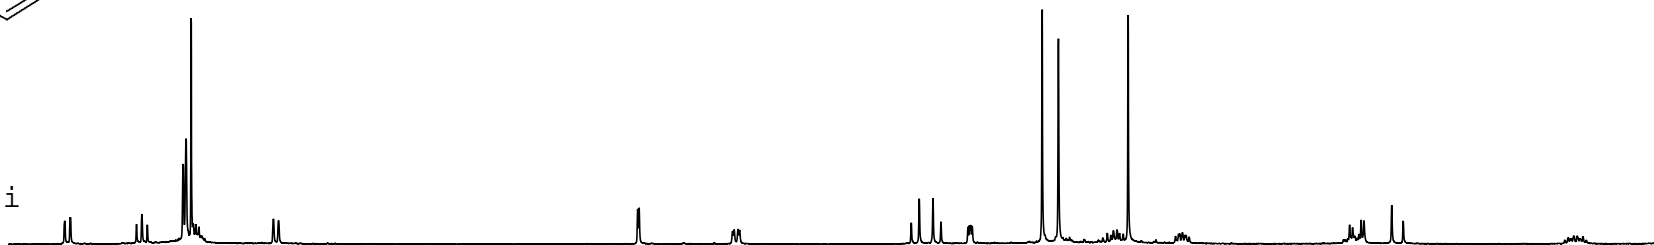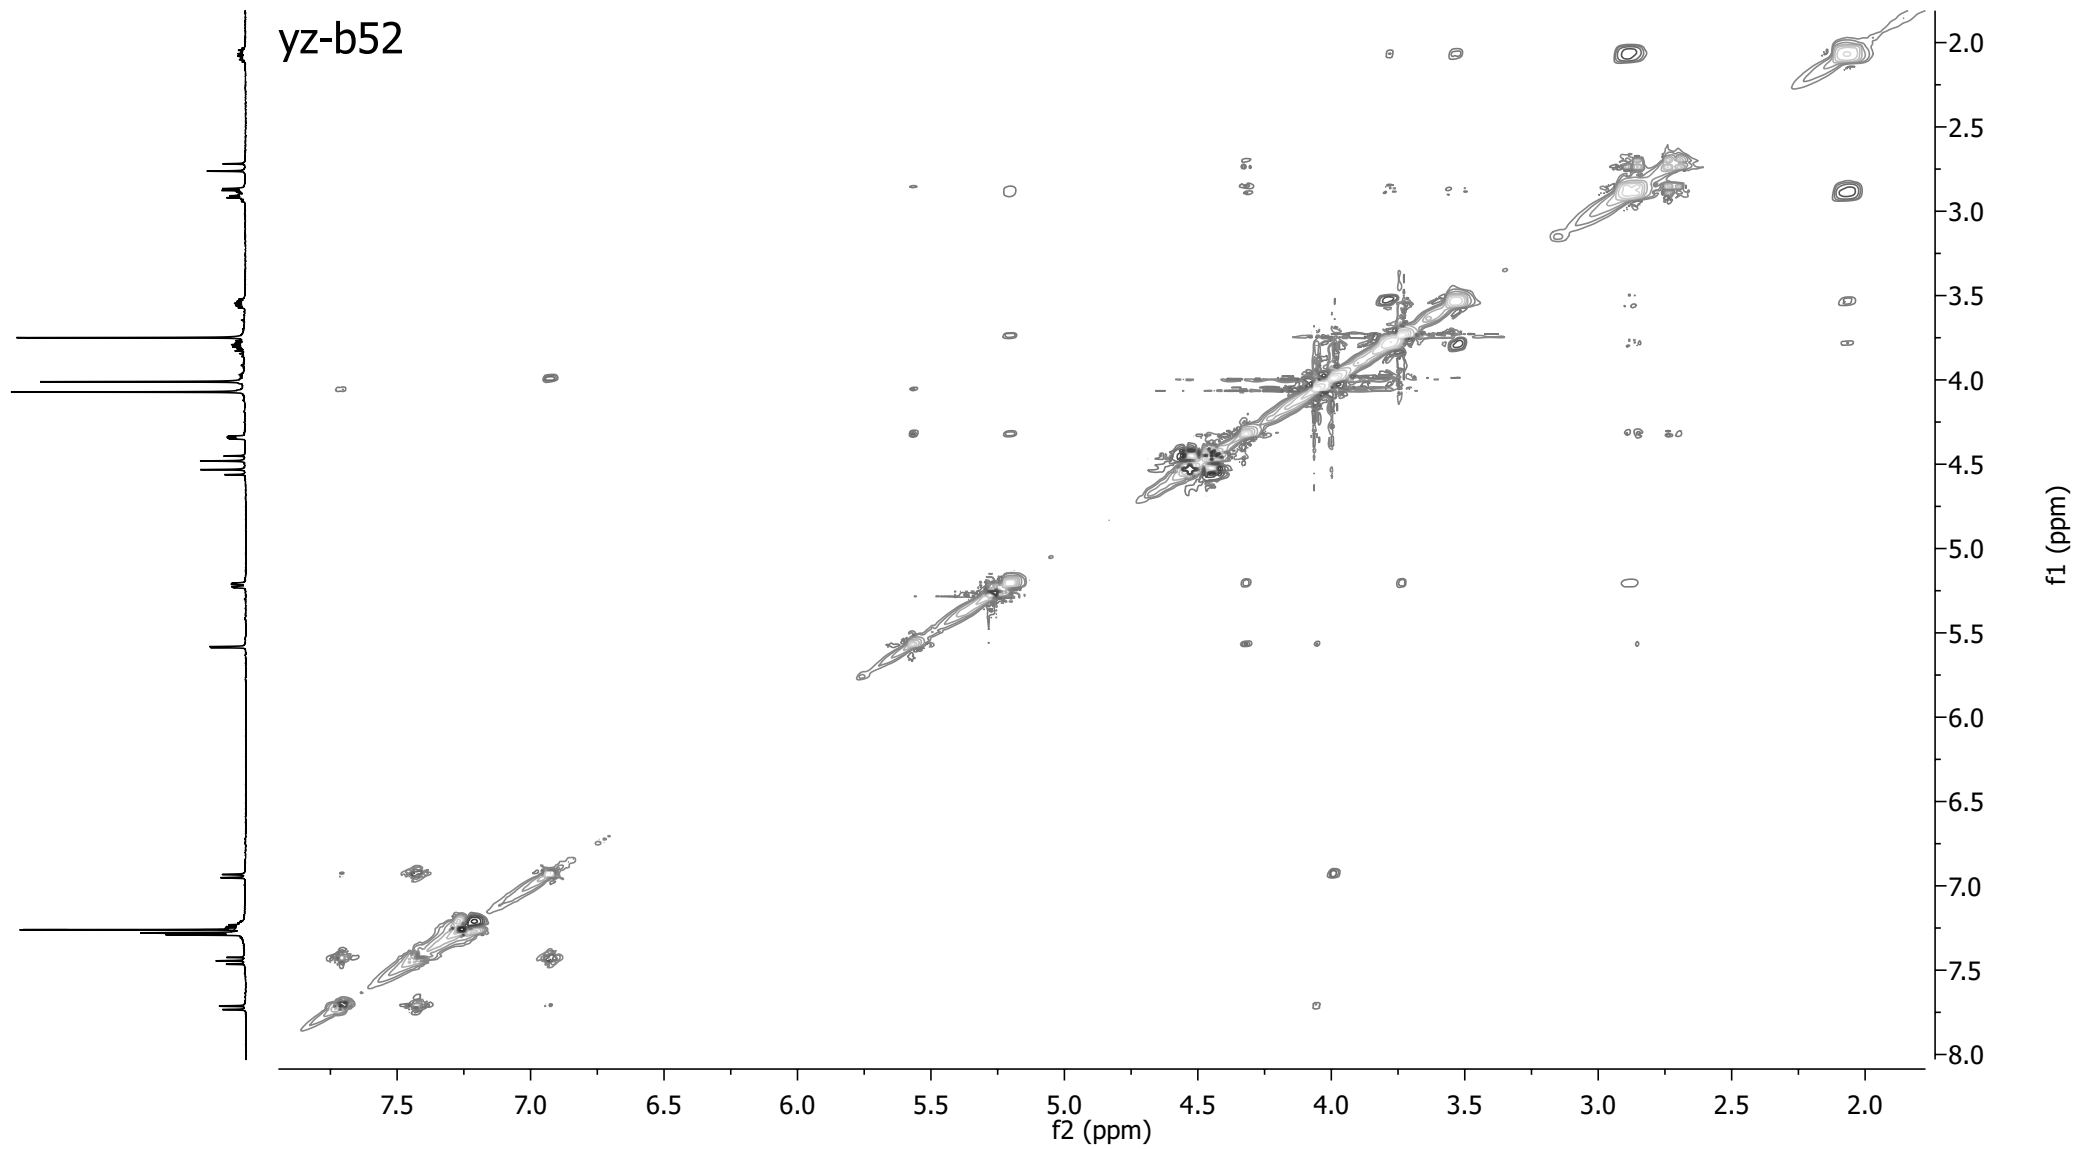

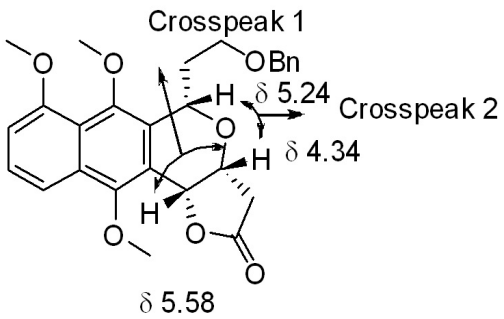

Scheme 2, compound 6i

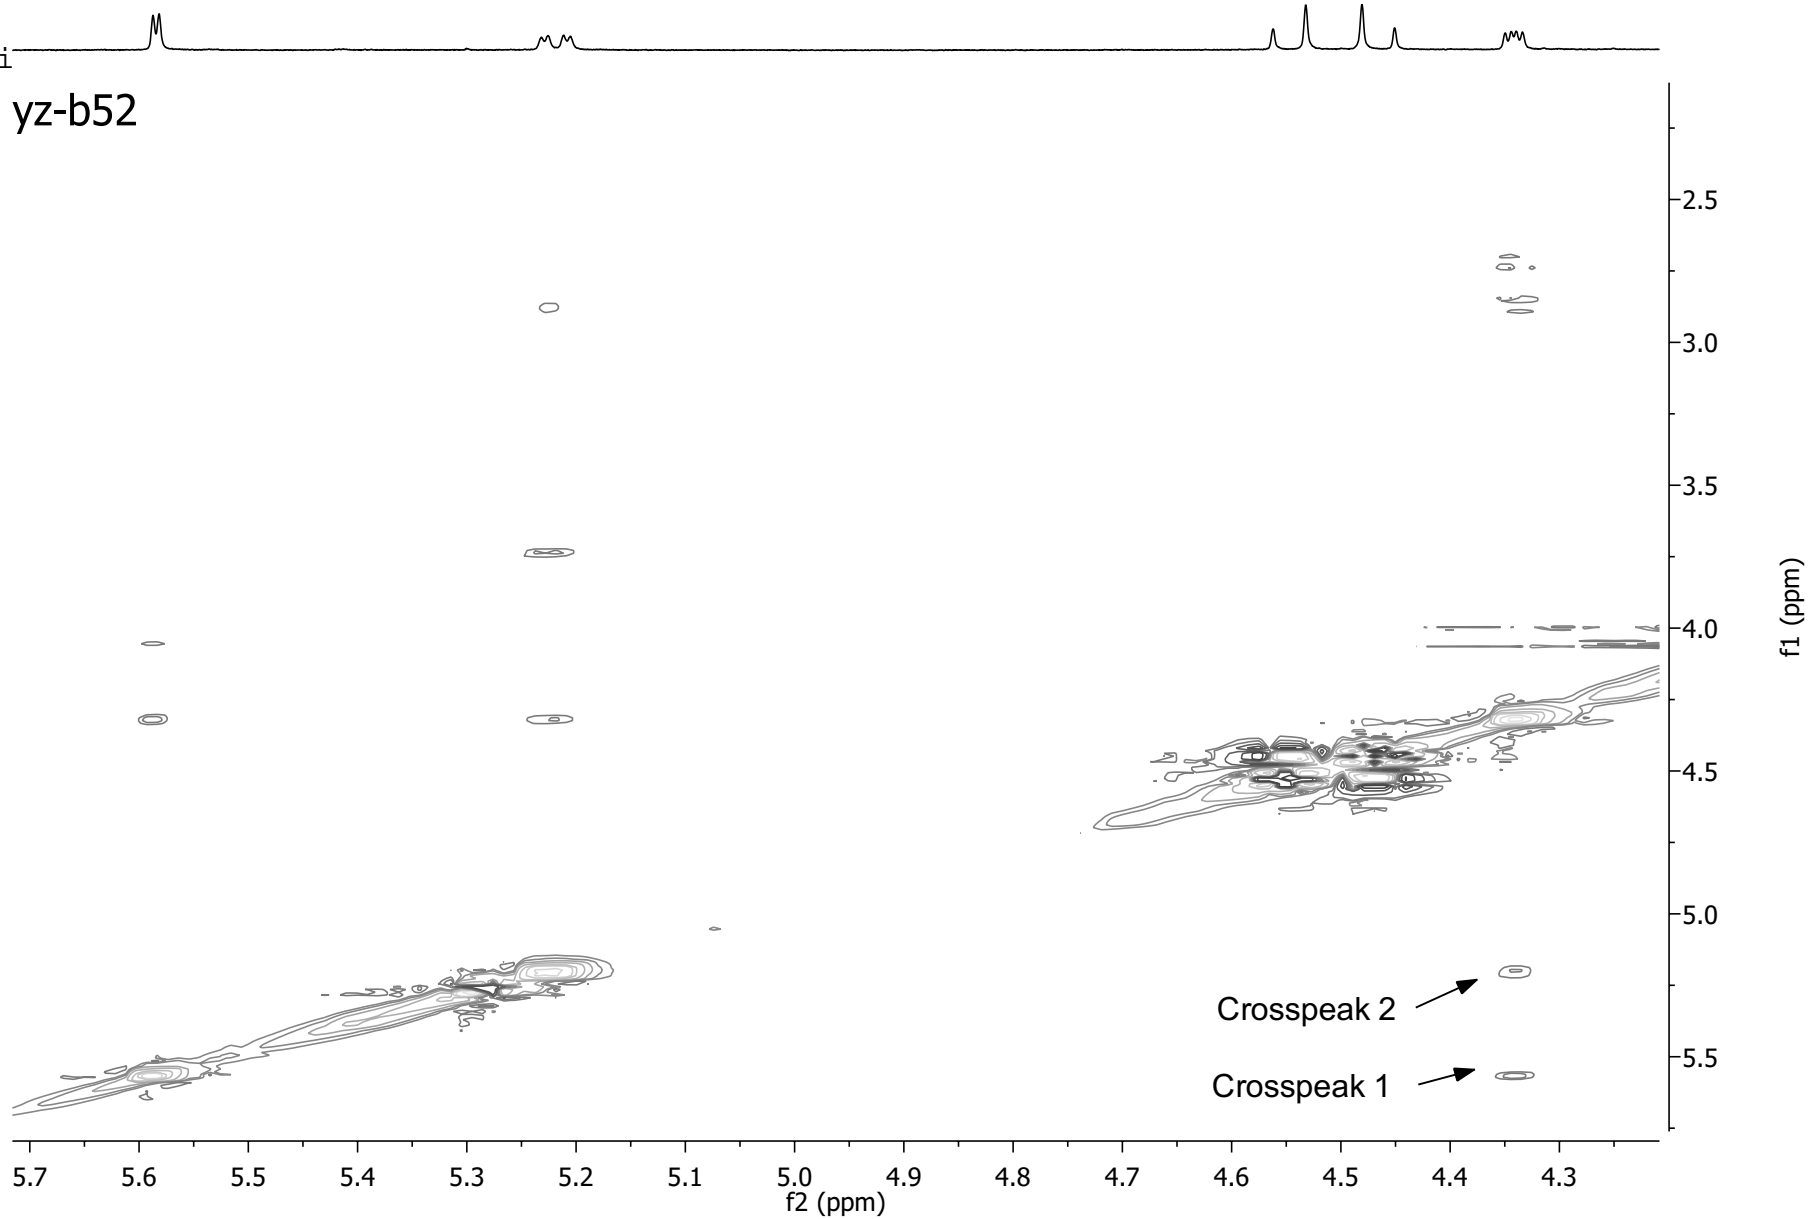

yz-b13-1

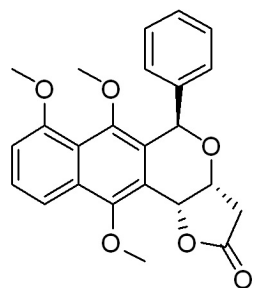

Scheme 2, compound 6jb

7.778  
7.756  
7.486  
7.465  
7.445  
7.265  
7.252  
7.085  
7.075  
6.940  
6.920  
— 6.363

5.575  
5.568

4.319  
4.312  
4.308  
4.300  
4.106  
3.955  
— 3.557

2.858  
2.845  
2.814  
2.801  
2.658  
2.613

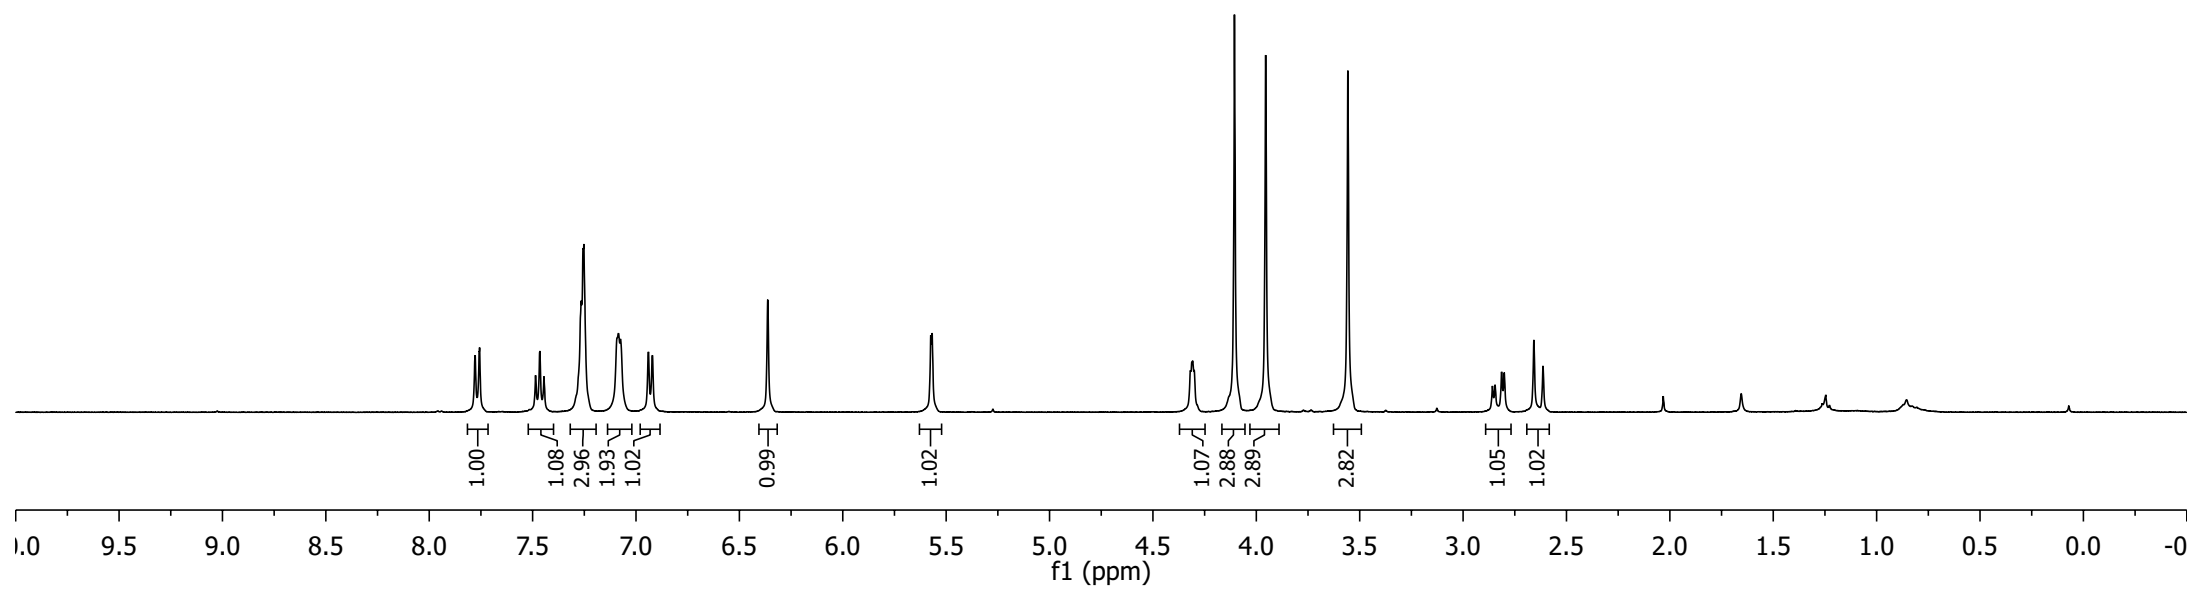



yz-b13-1

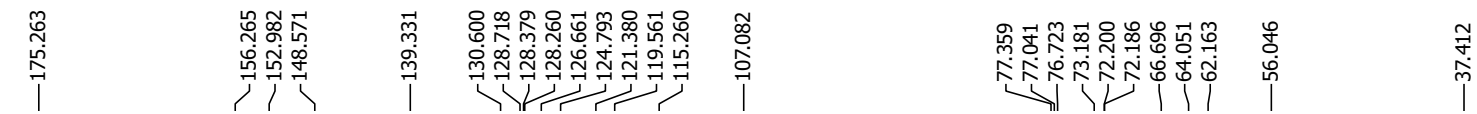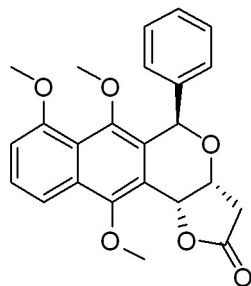

Scheme 2, compound 6jb

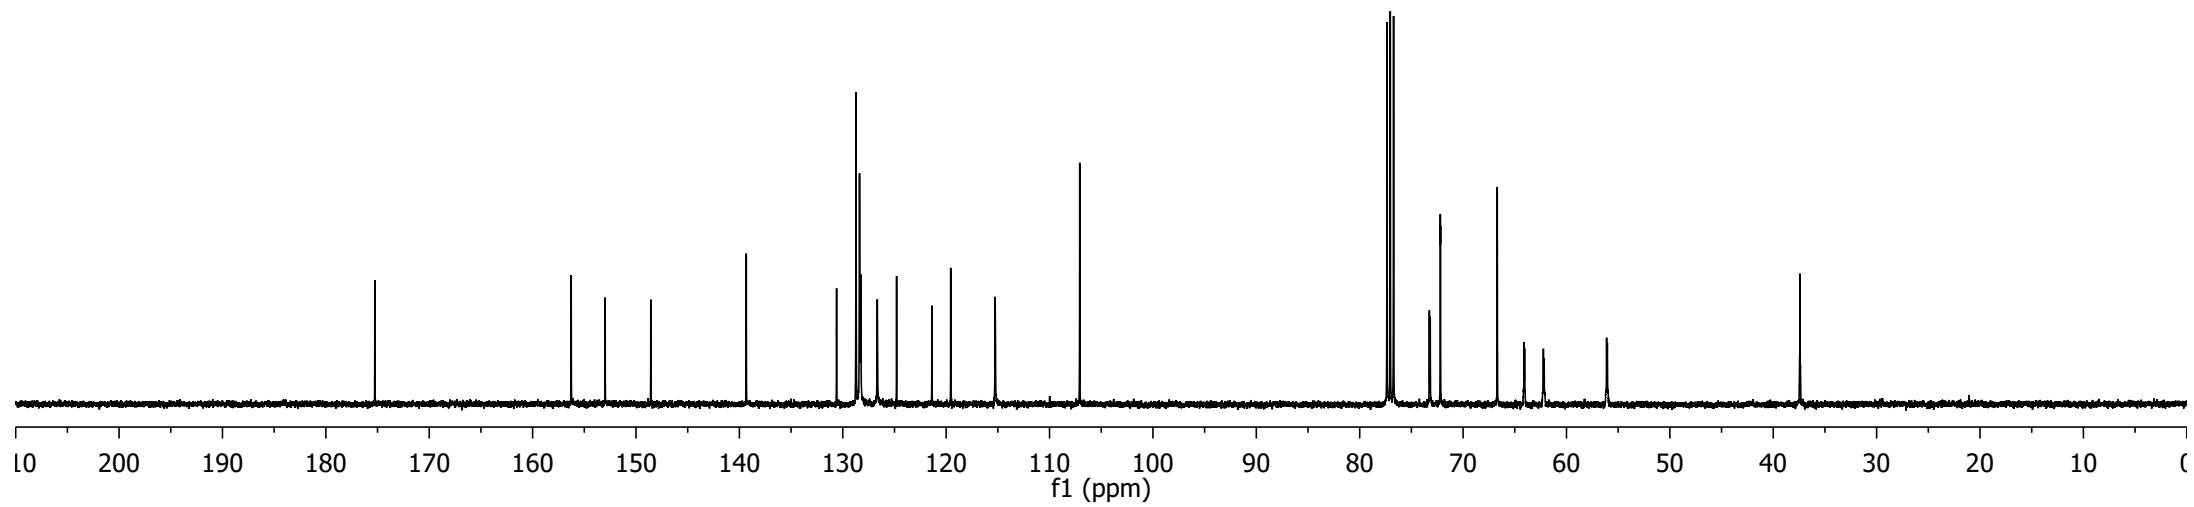

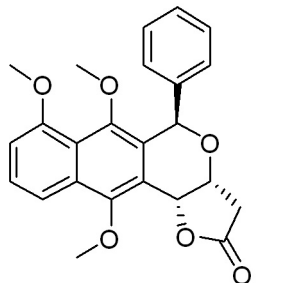

Scheme 2, compound 6jb

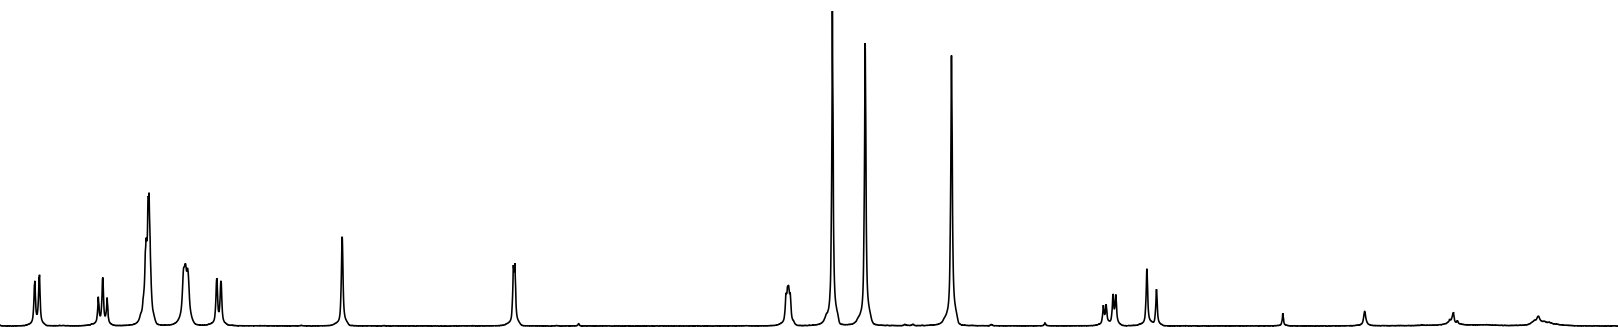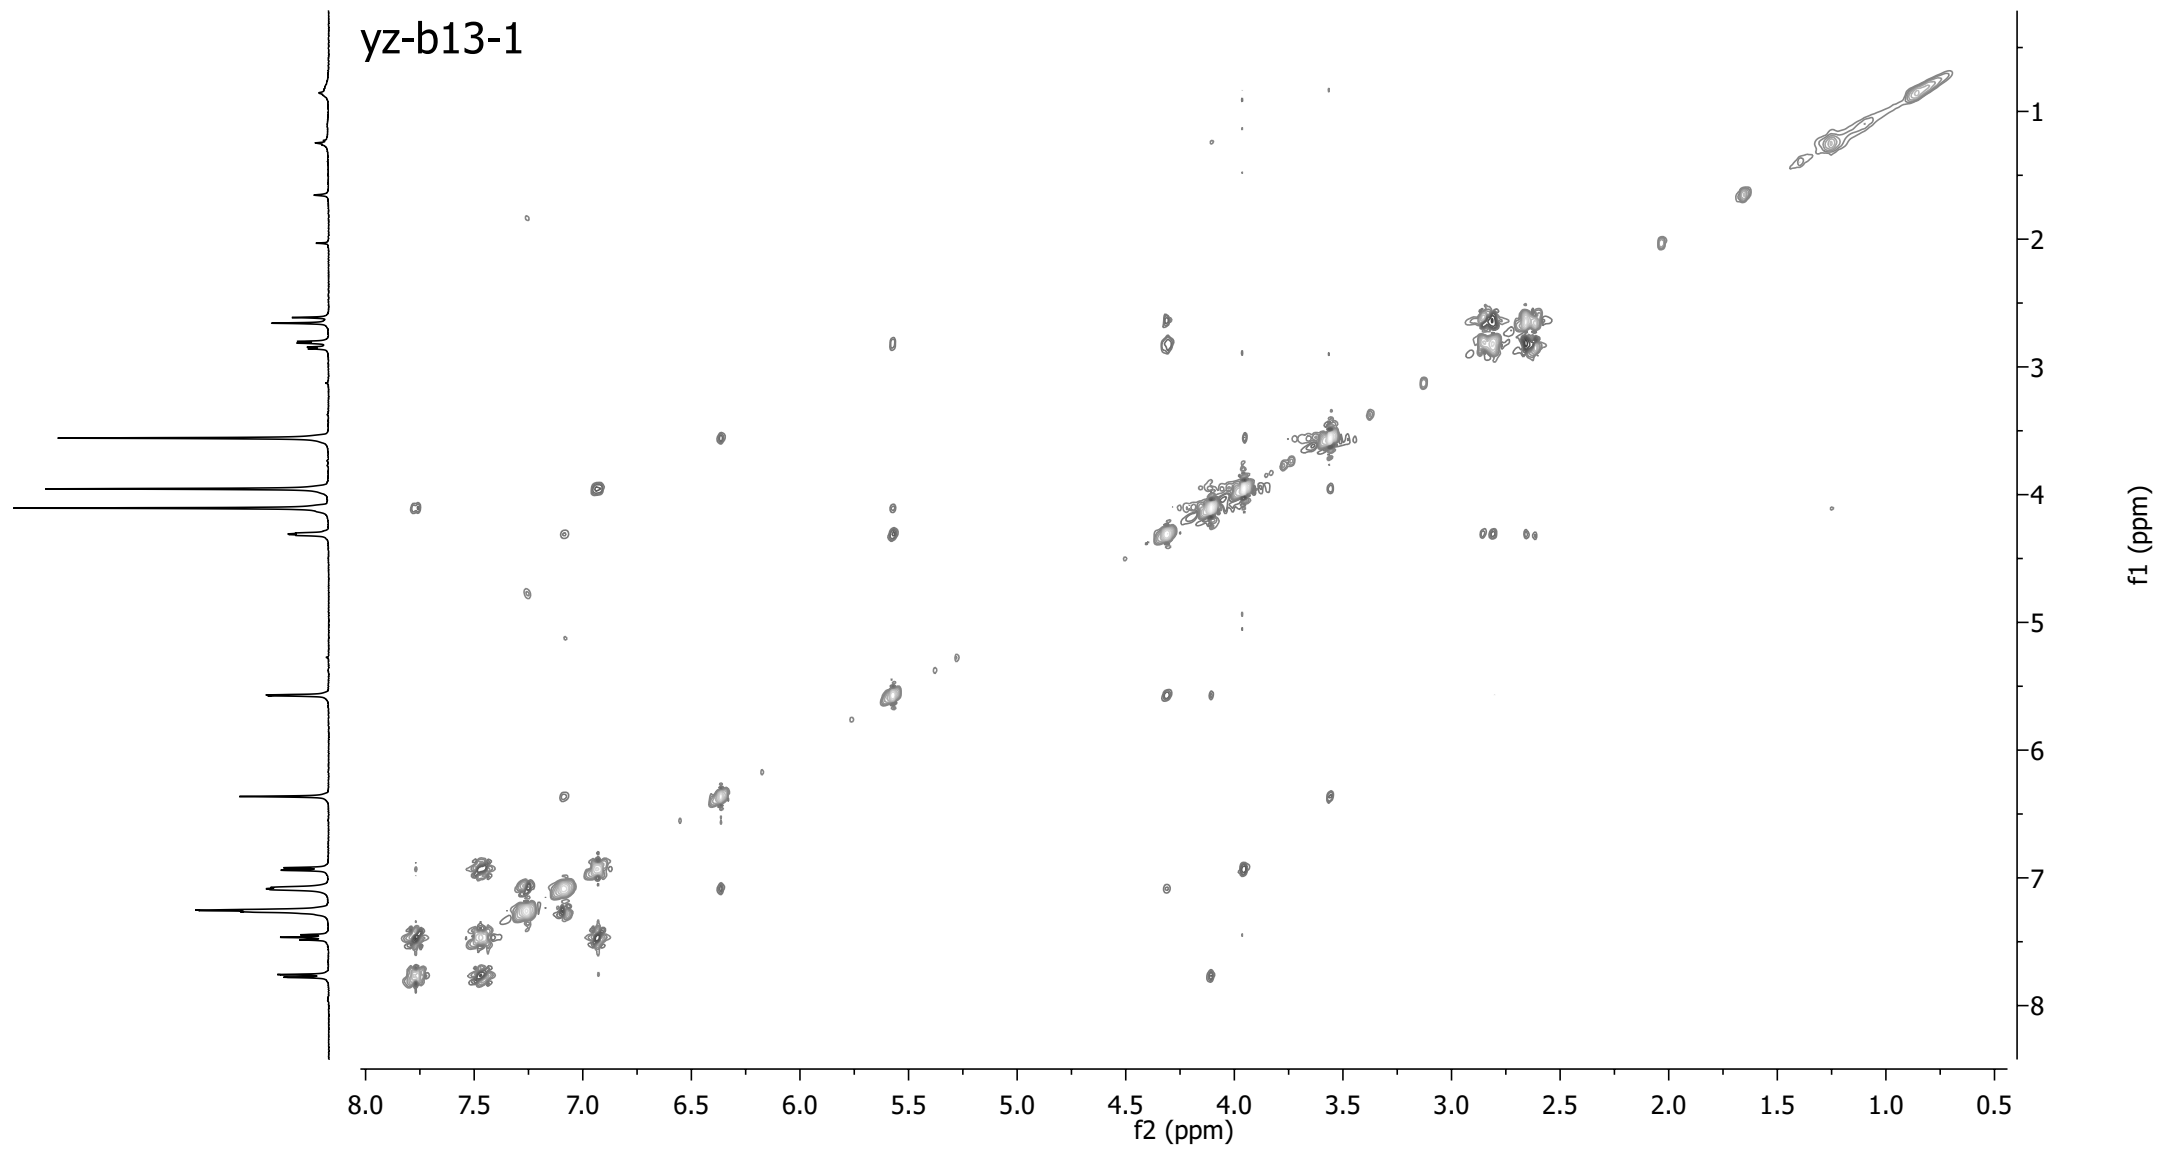

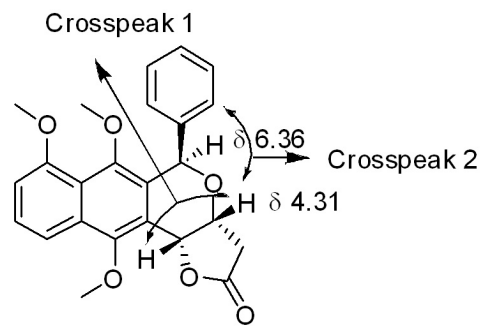

Scheme 2, compound 6jb

yz-b13-1

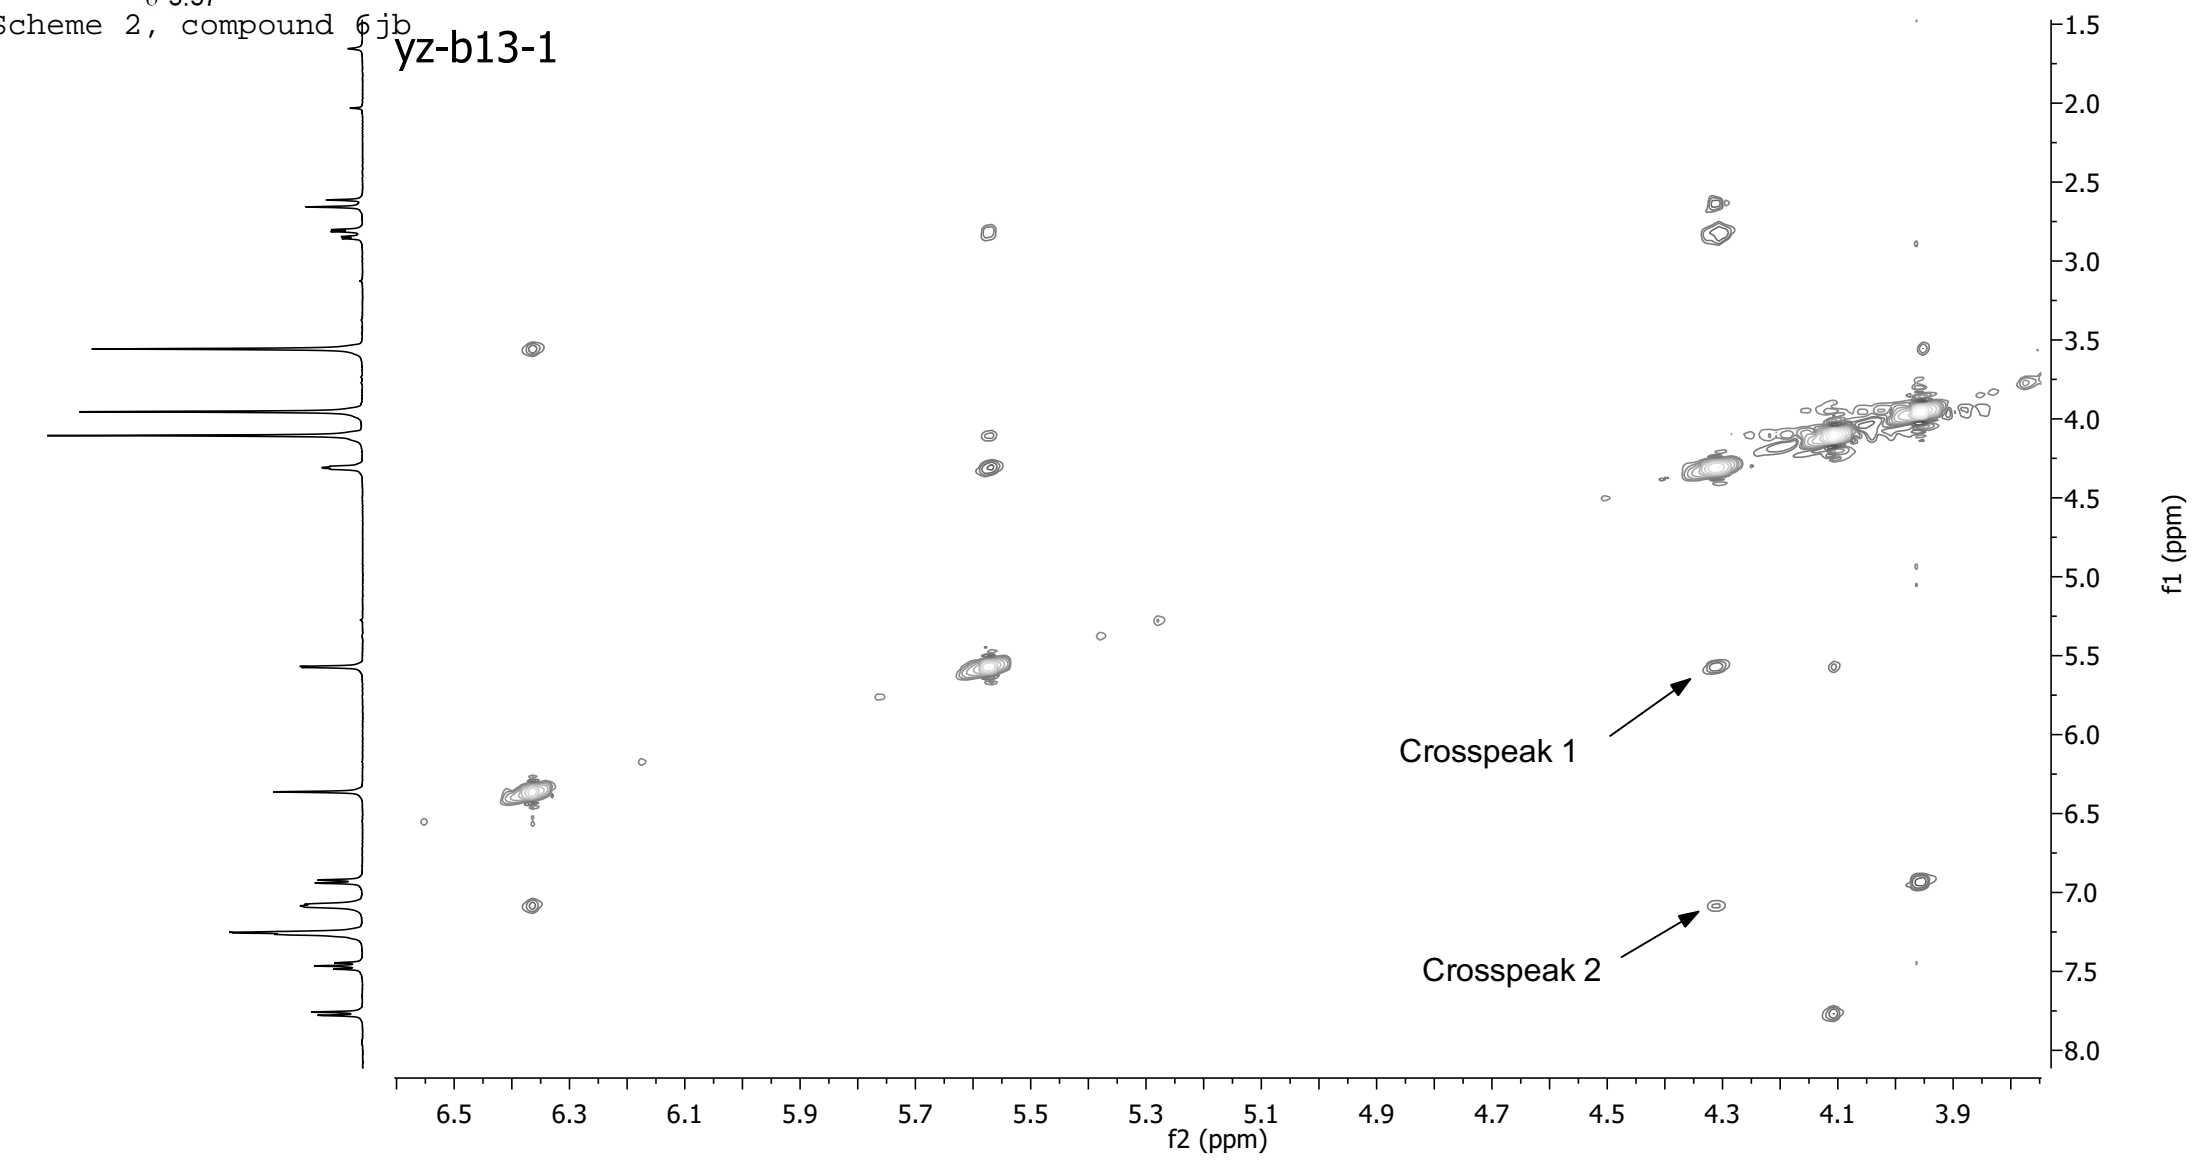

yz-b13-2

7.770  
7.749  
7.464  
7.444  
7.333  
7.317  
6.899  
6.880

5.976

5.674  
5.669

4.503

4.165

3.908

3.066  
2.917  
2.906  
2.873  
2.863  
2.764  
2.721

2.046

1.583

1.260

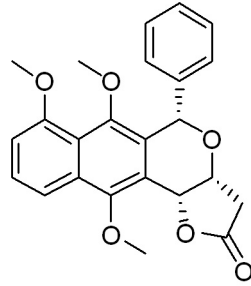

Scheme 2, compound 6ja

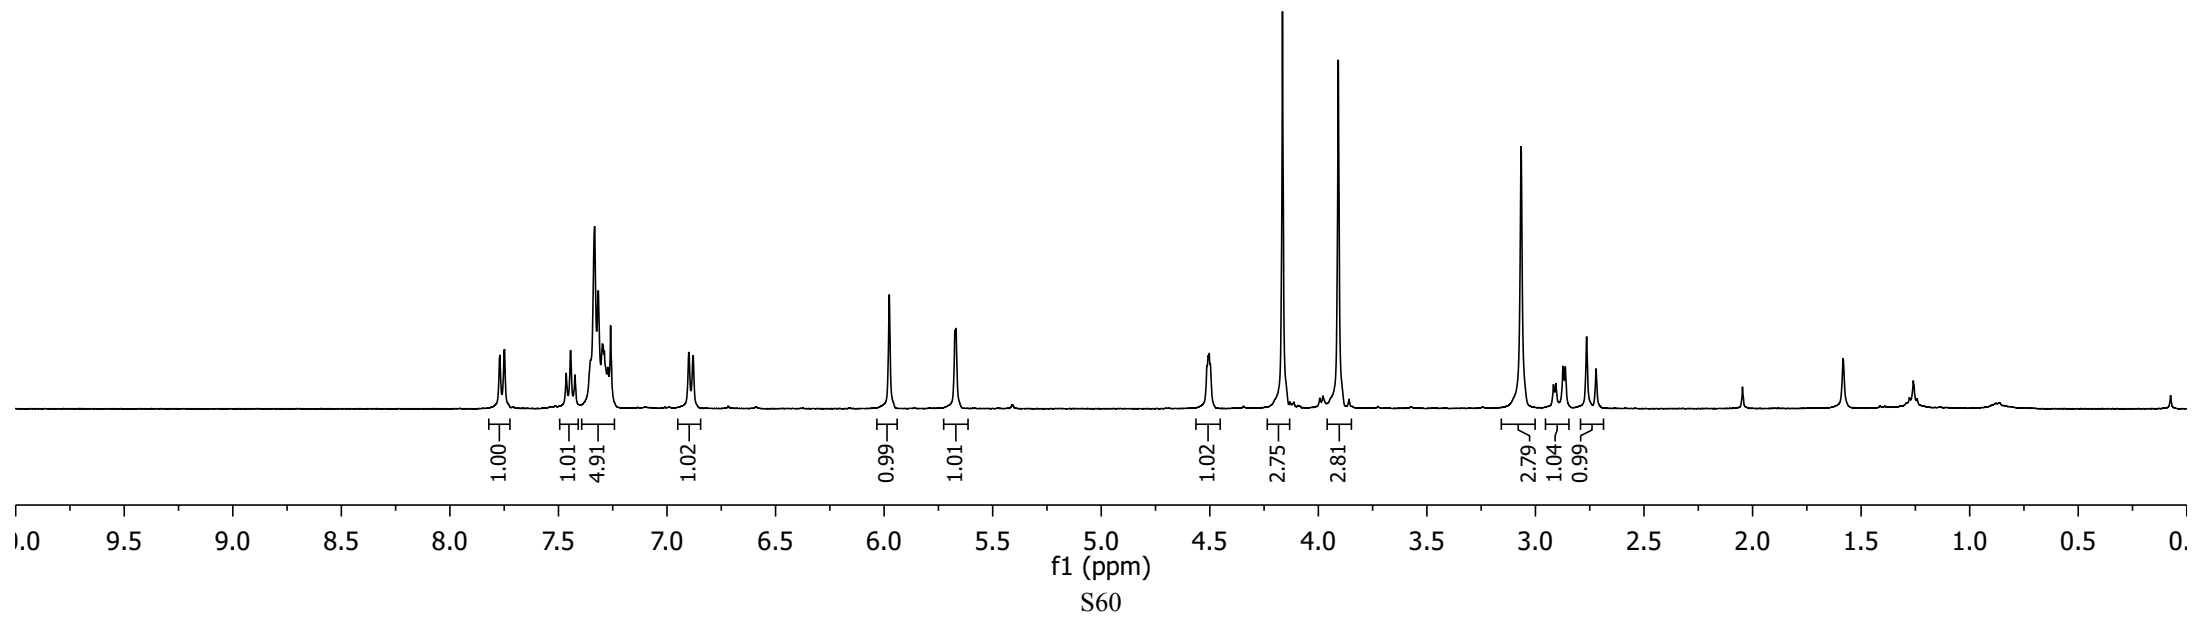

yz-b13-2

—175.680  
—156.168  
—153.147  
—149.395  
—143.199  
—130.807  
—128.547  
—128.483  
—128.146  
—127.052  
—126.905  
—121.739  
—119.441  
—115.228  
—107.227  
—77.478  
—77.160  
—76.842  
—76.720  
—72.622  
—71.883  
—64.704  
—61.410  
—56.164  
—38.507

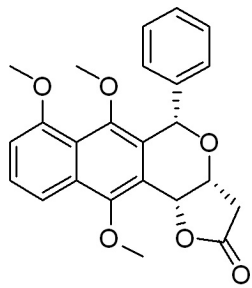

Scheme 2, compound 6ja

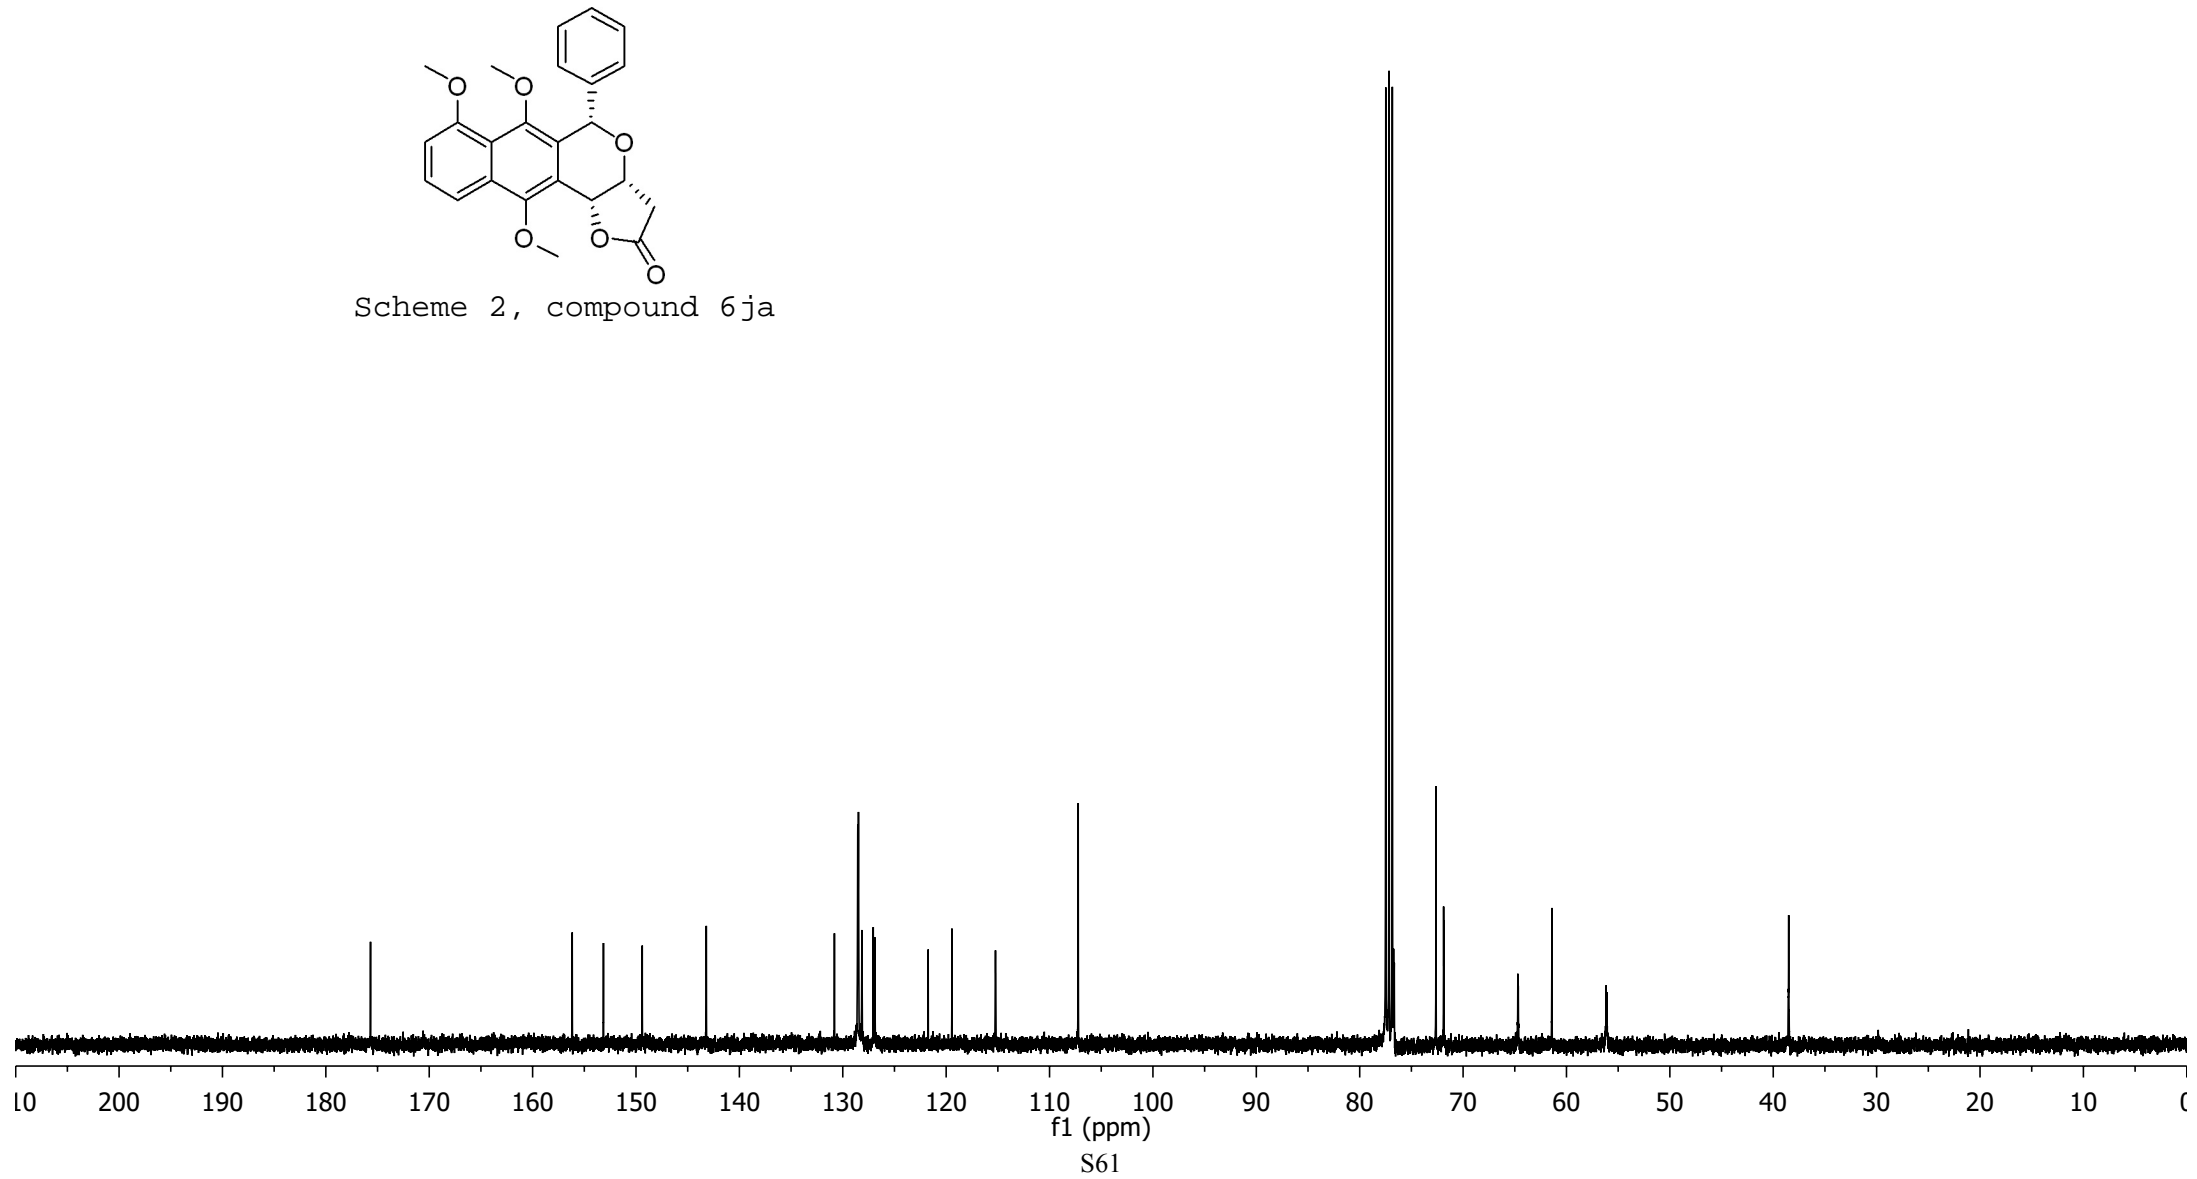

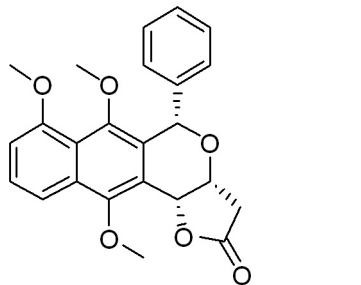

Scheme 2, compound 6ja

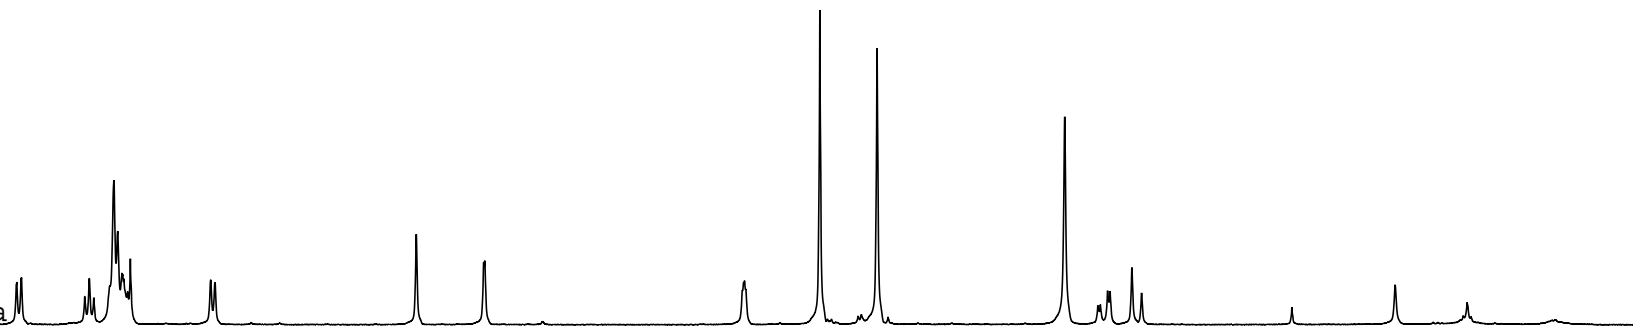

yz-b13-2

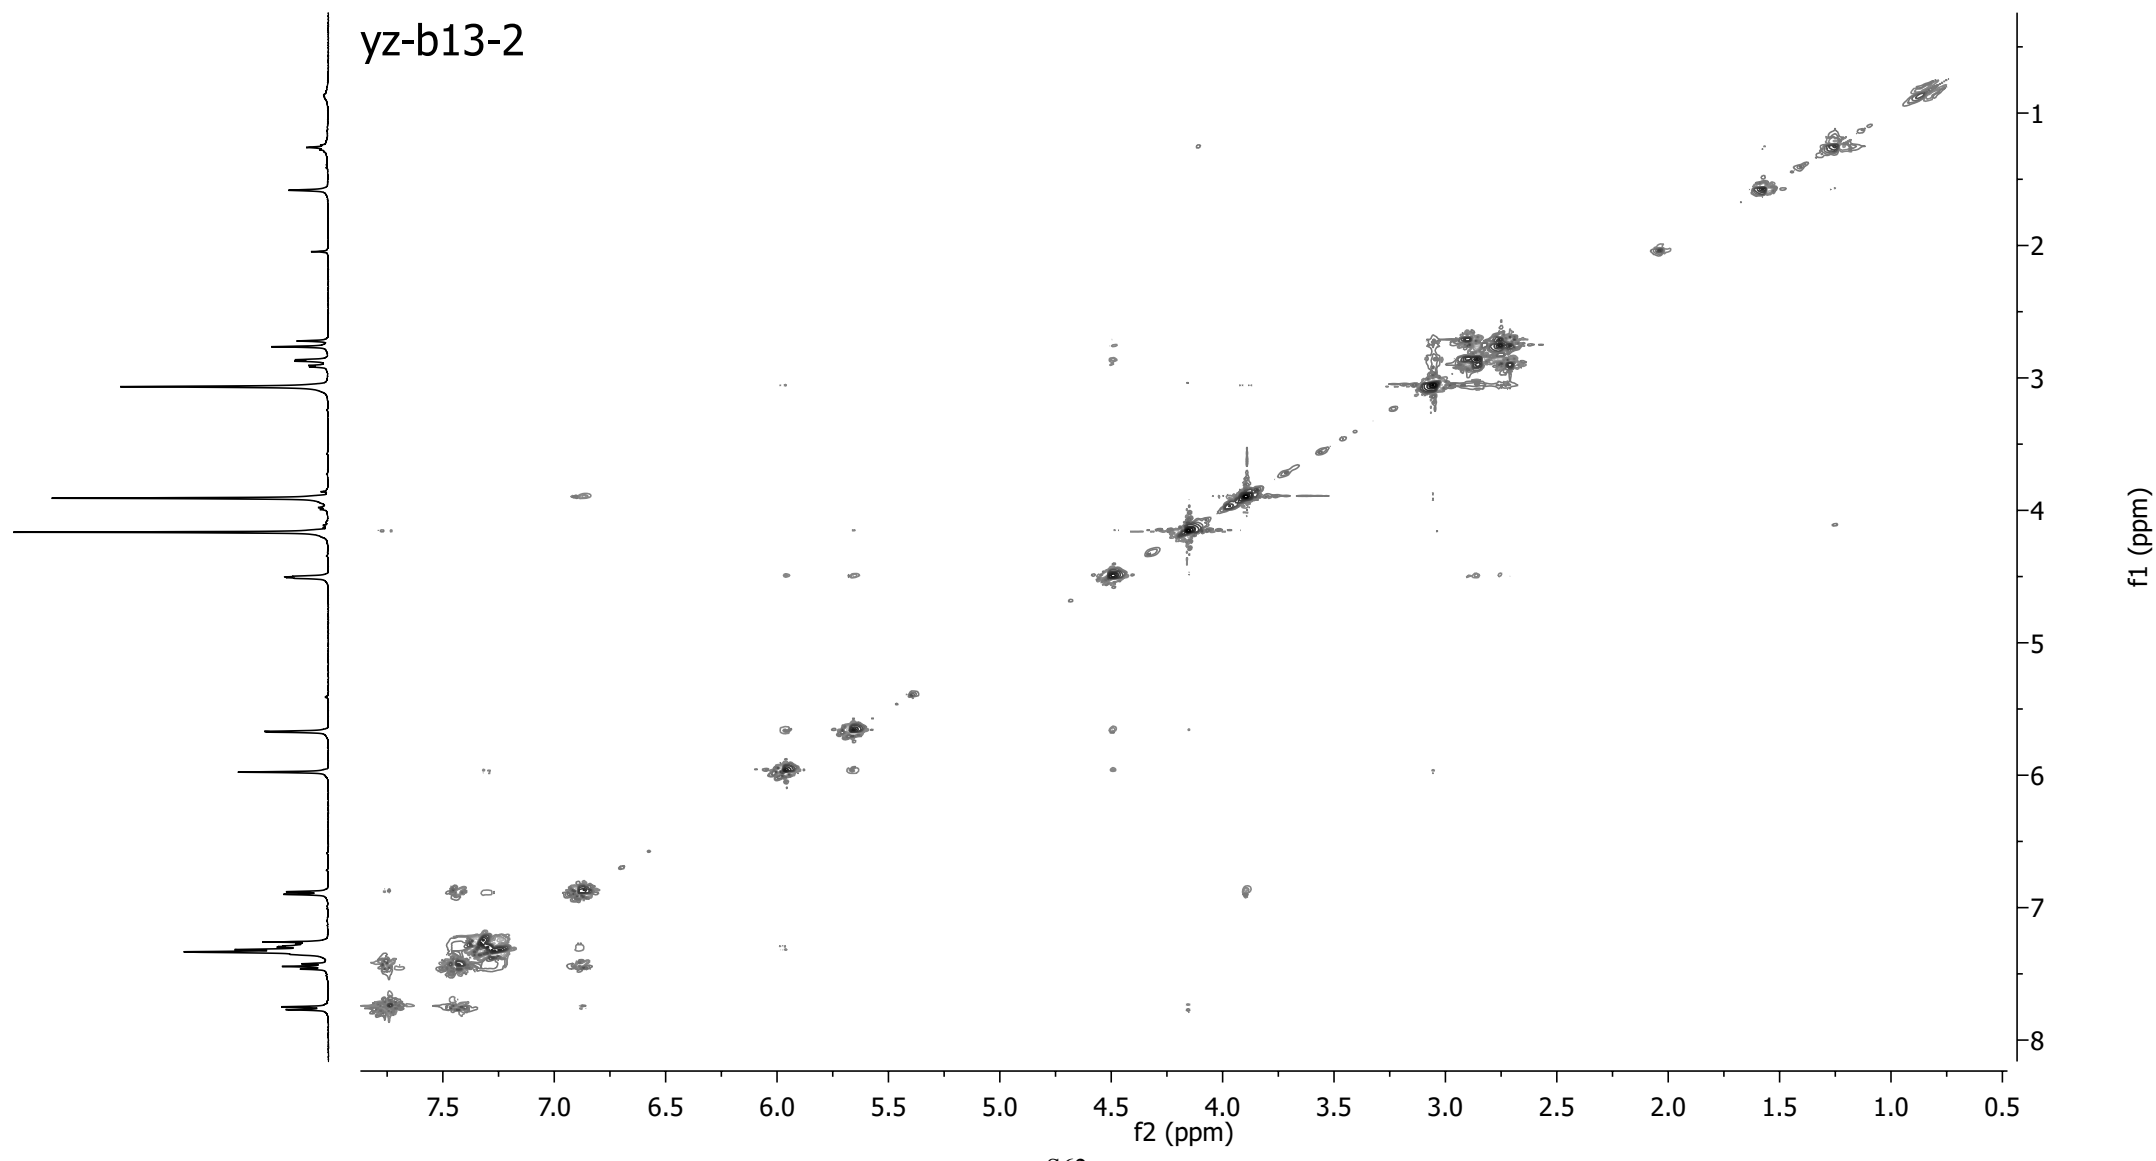

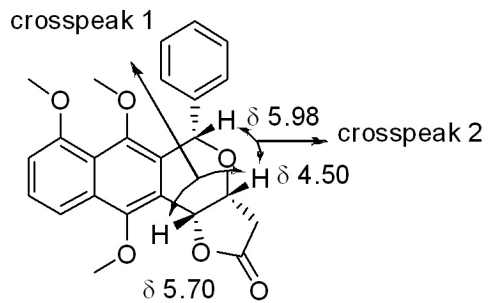

Scheme 2, compound 6ja

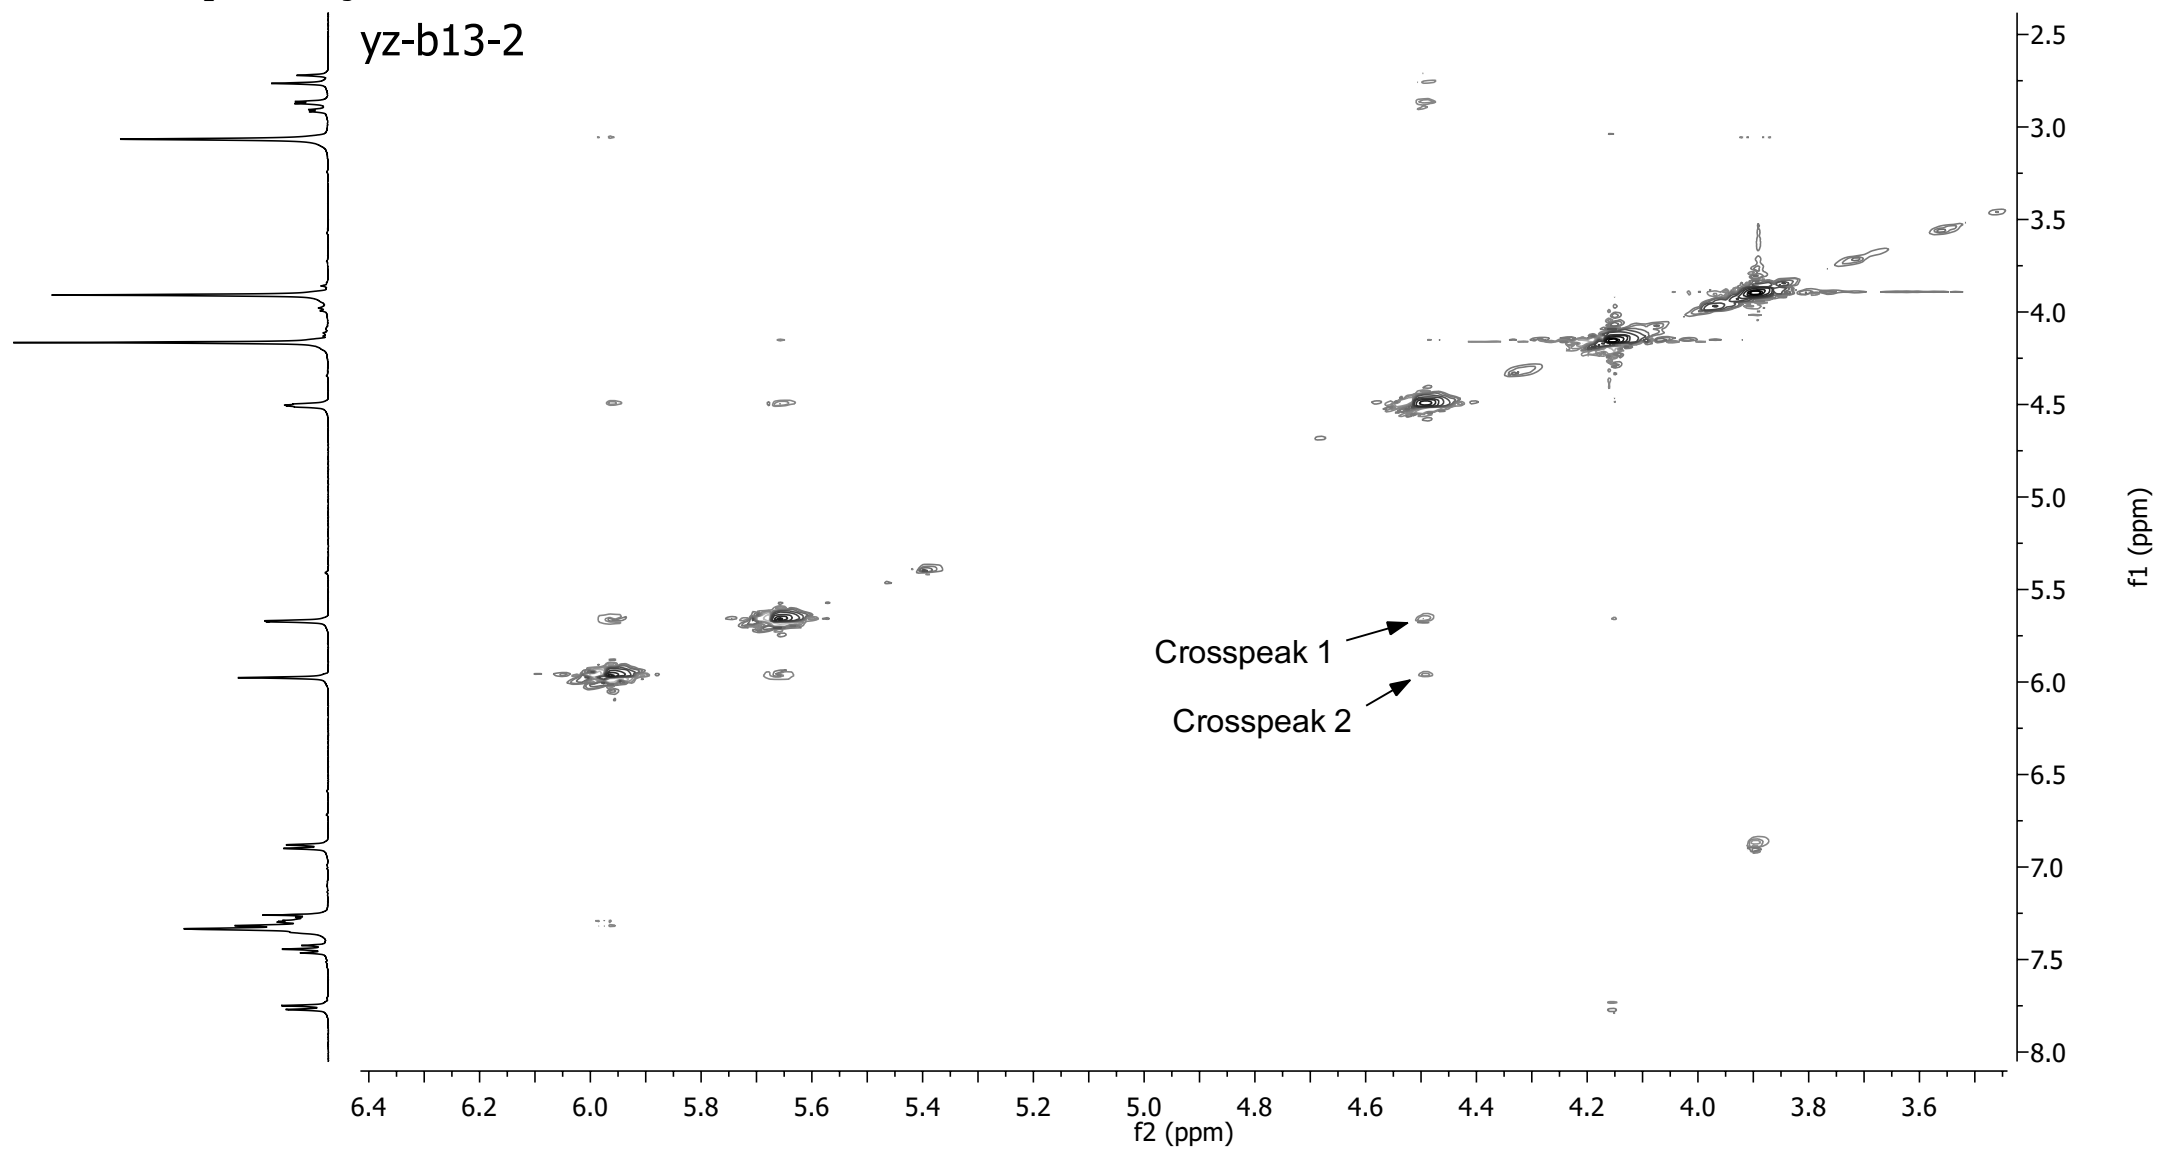

yz-b14

7.757  
7.736  
7.468  
7.447  
7.428  
7.057  
7.037  
6.935  
6.923  
6.904  
6.884  
6.836  
6.836

5.665

4.534  
4.529

4.145

3.904

3.424

2.957  
2.946  
2.913  
2.902  
2.758  
2.715

2.040

1.272  
1.254  
1.236

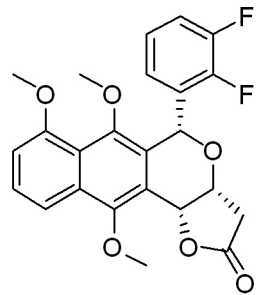

Scheme 2, compound 6k

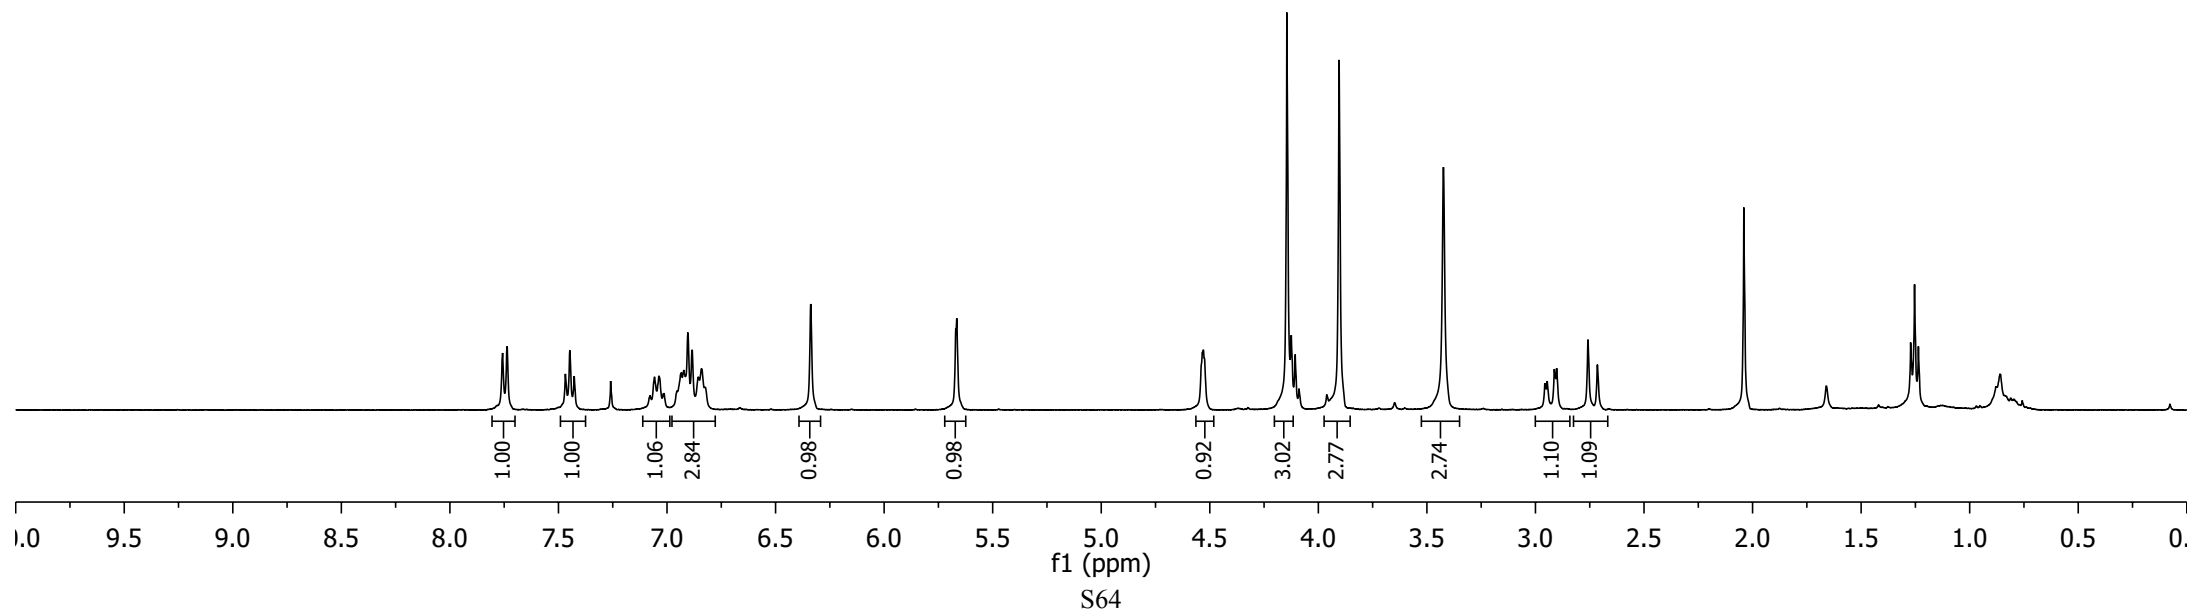



yz-b14

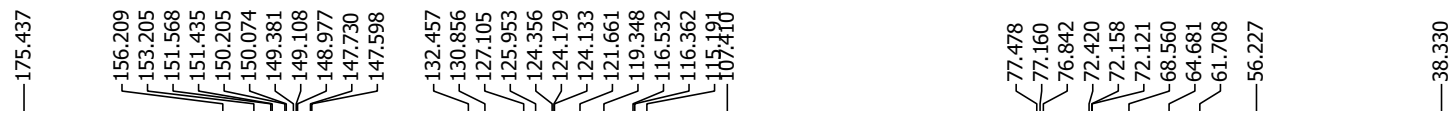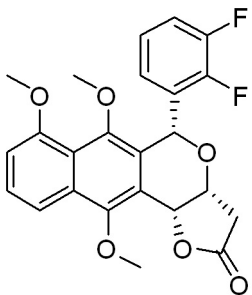

Scheme 2, compound 6k

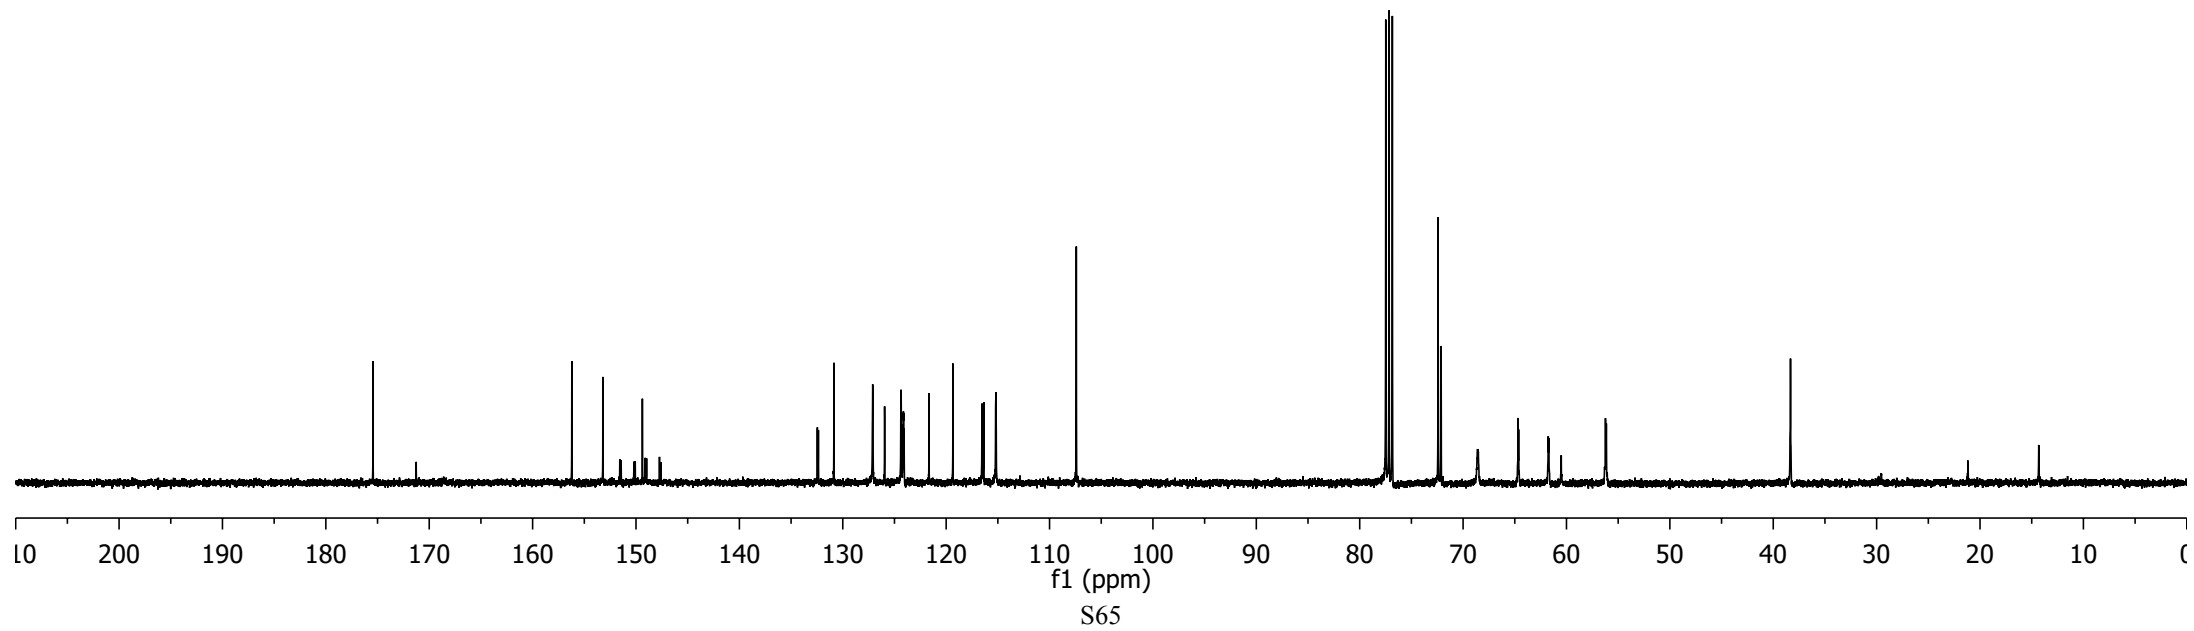

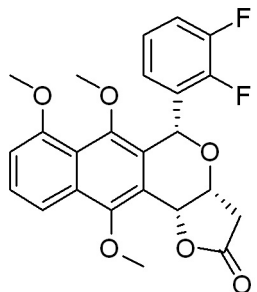

Scheme 2, compound 6k

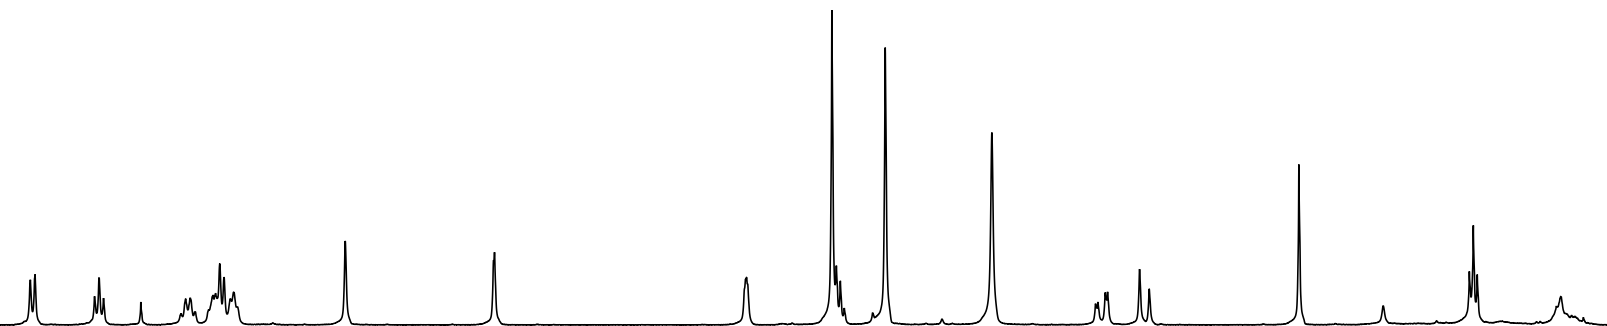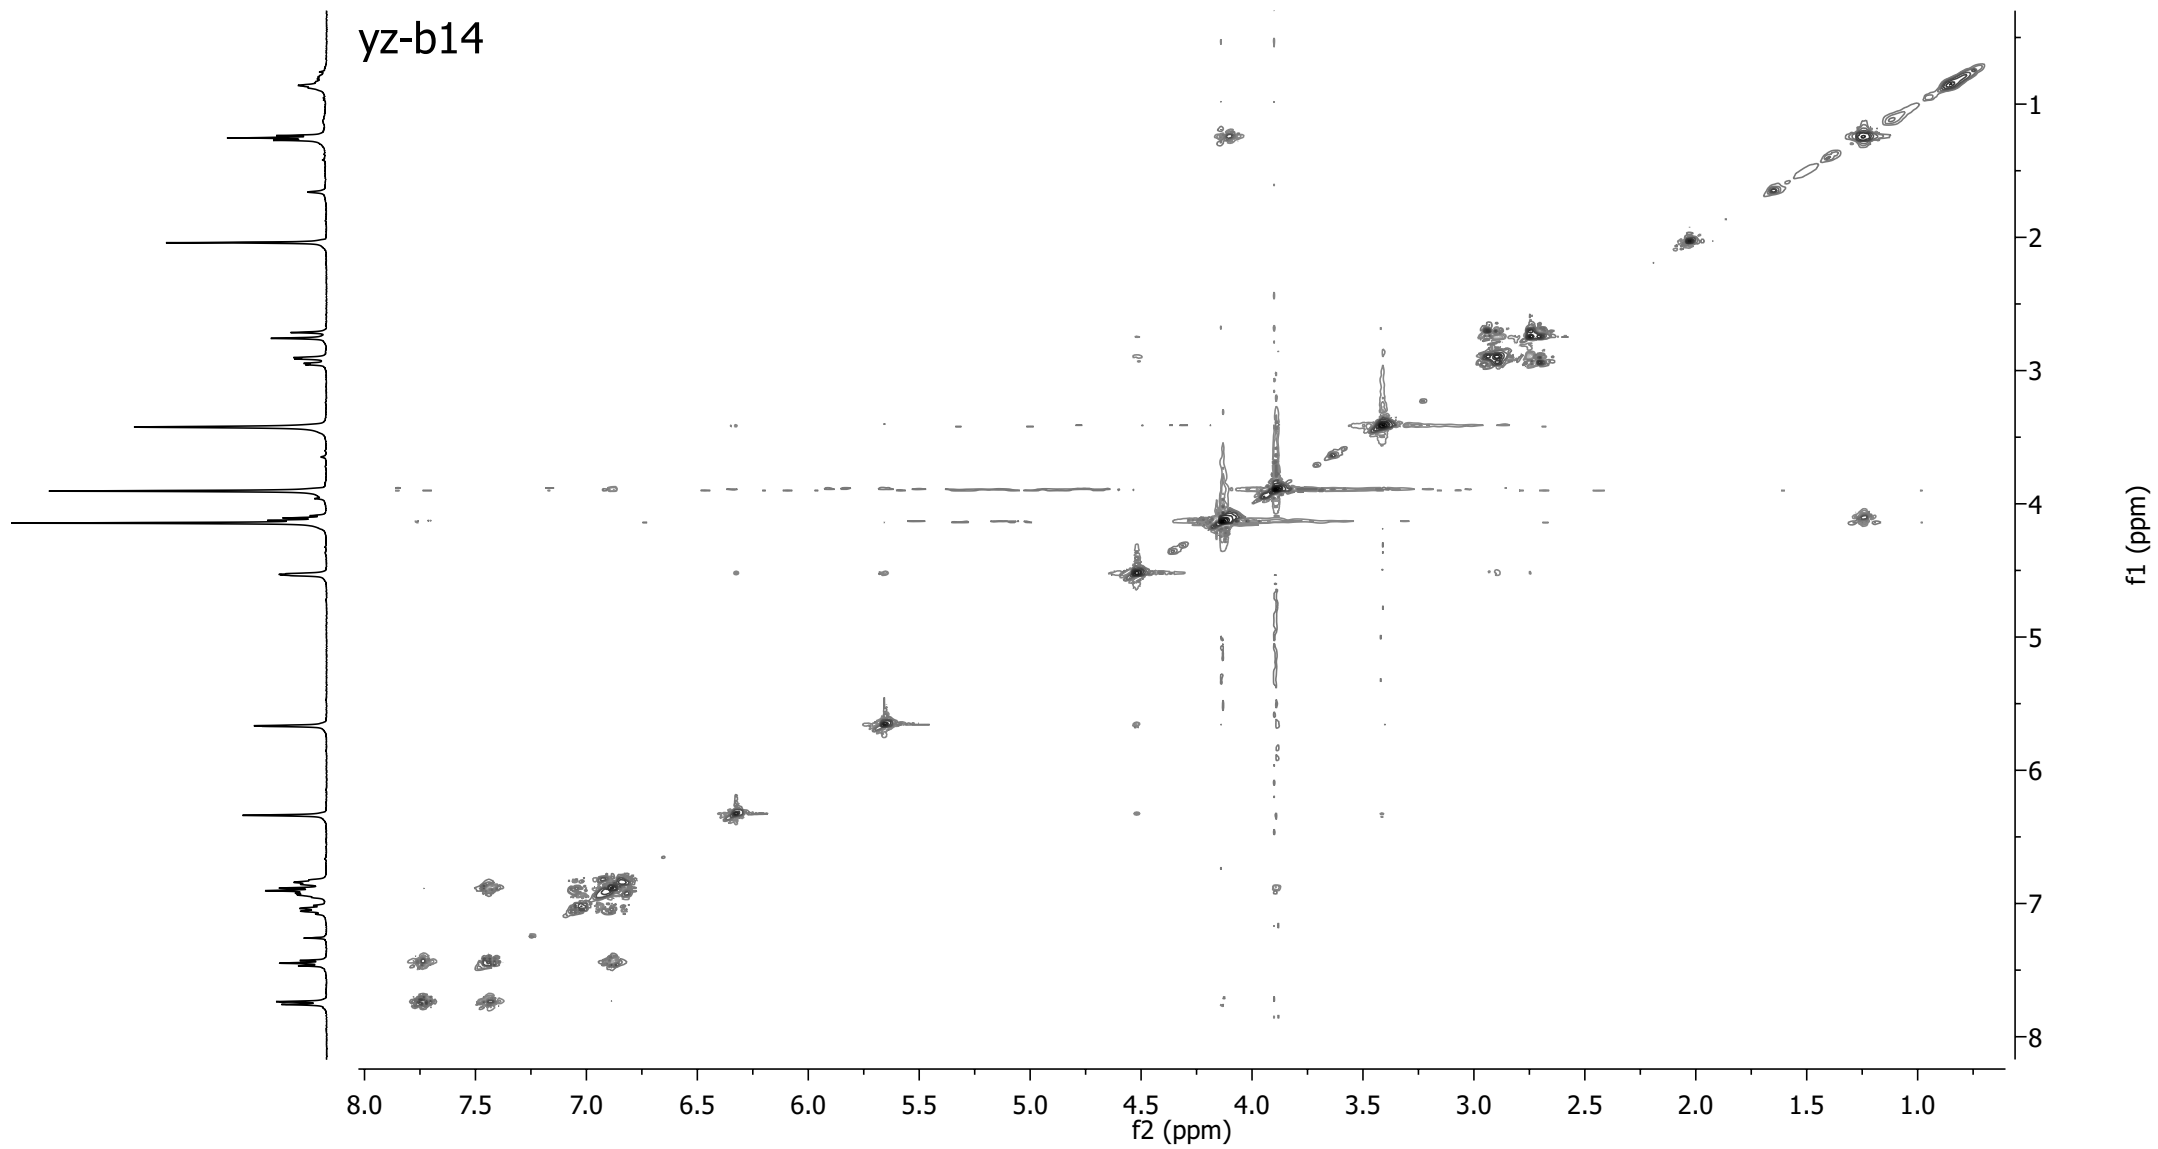

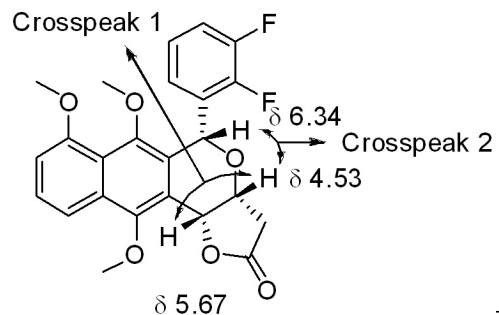

Scheme 2, compound 6k

yz-b14

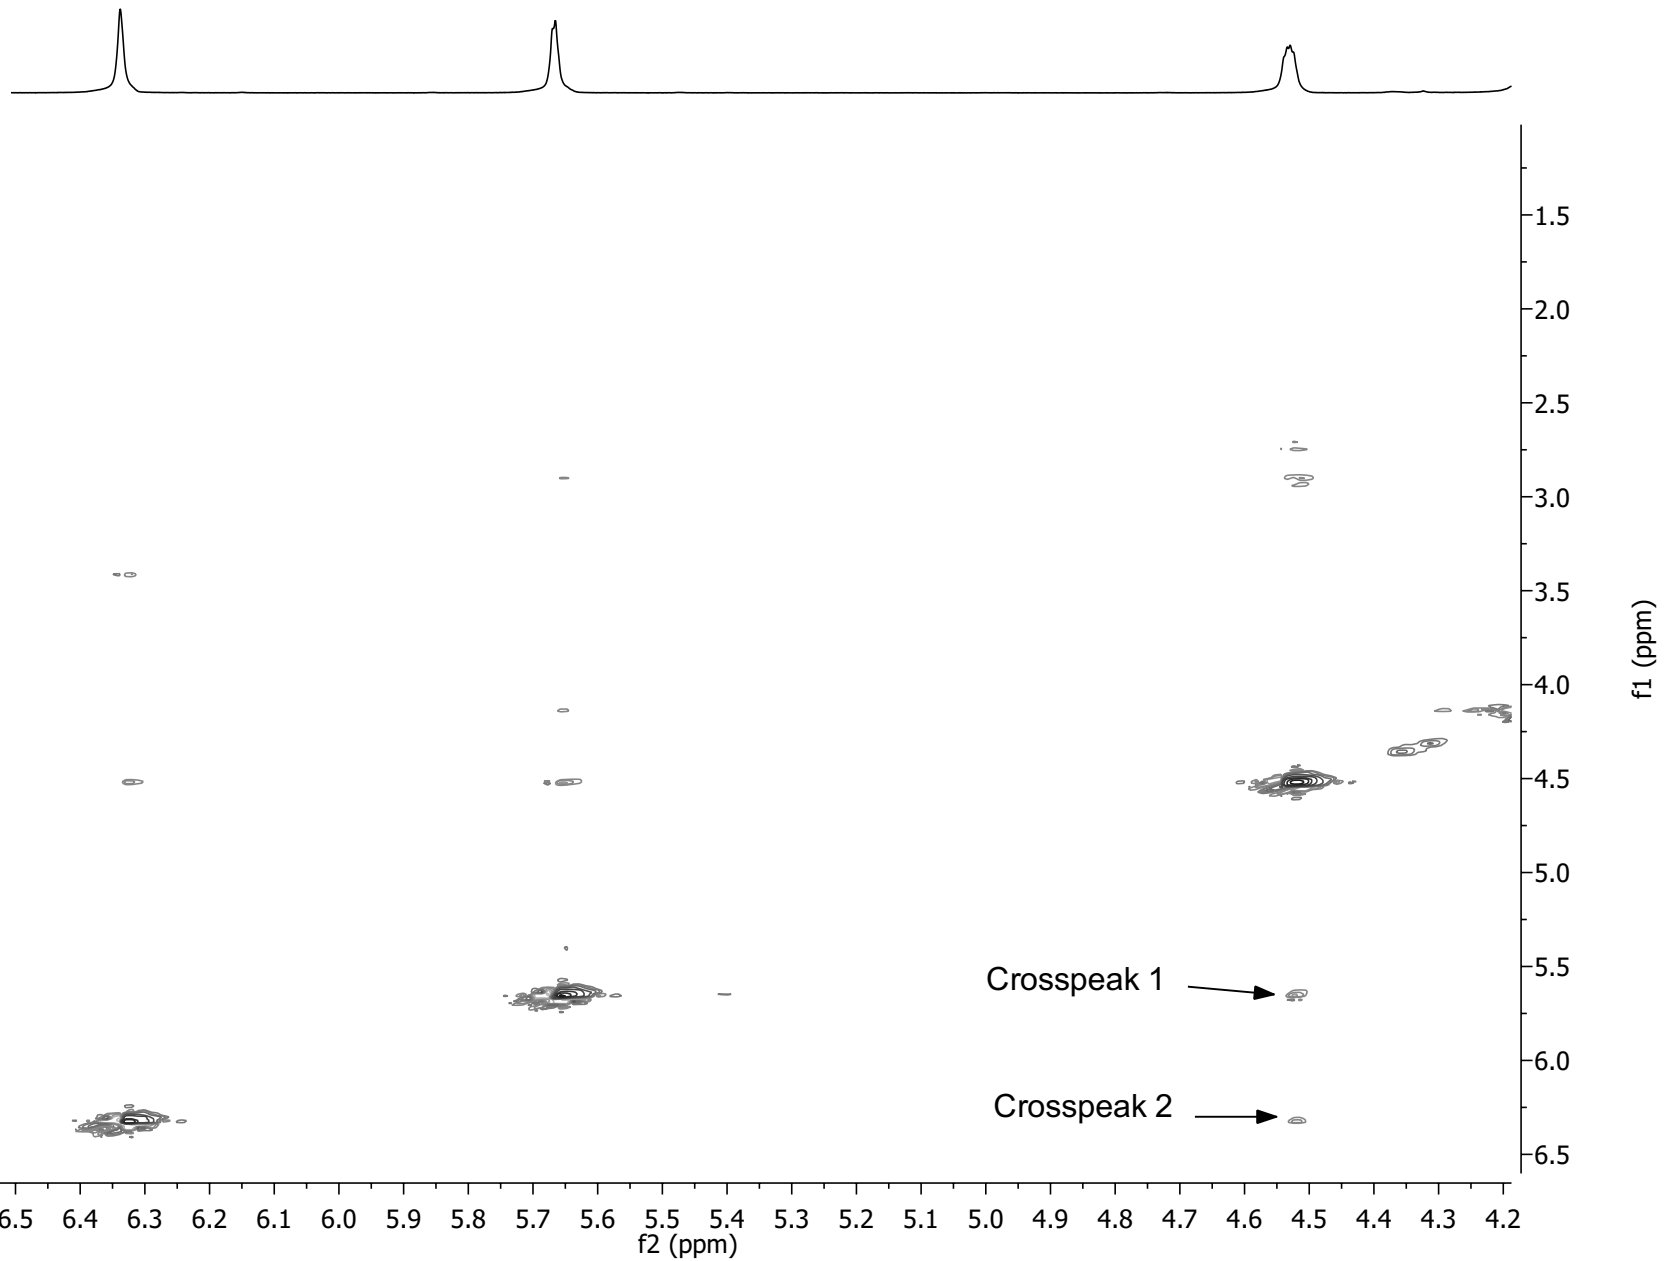

yz-b34

7.782  
7.779  
7.760  
7.758  
7.471  
7.450  
7.430  
7.260  
6.994  
6.973  
6.915  
6.896  
6.874  
6.868

5.659  
5.652

4.448

4.126  
3.982  
3.940

3.505

2.876  
2.863  
2.832  
2.819  
2.702  
2.658

2.043

1.643

1.256

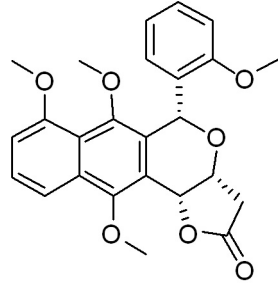

Scheme 2, compound 61

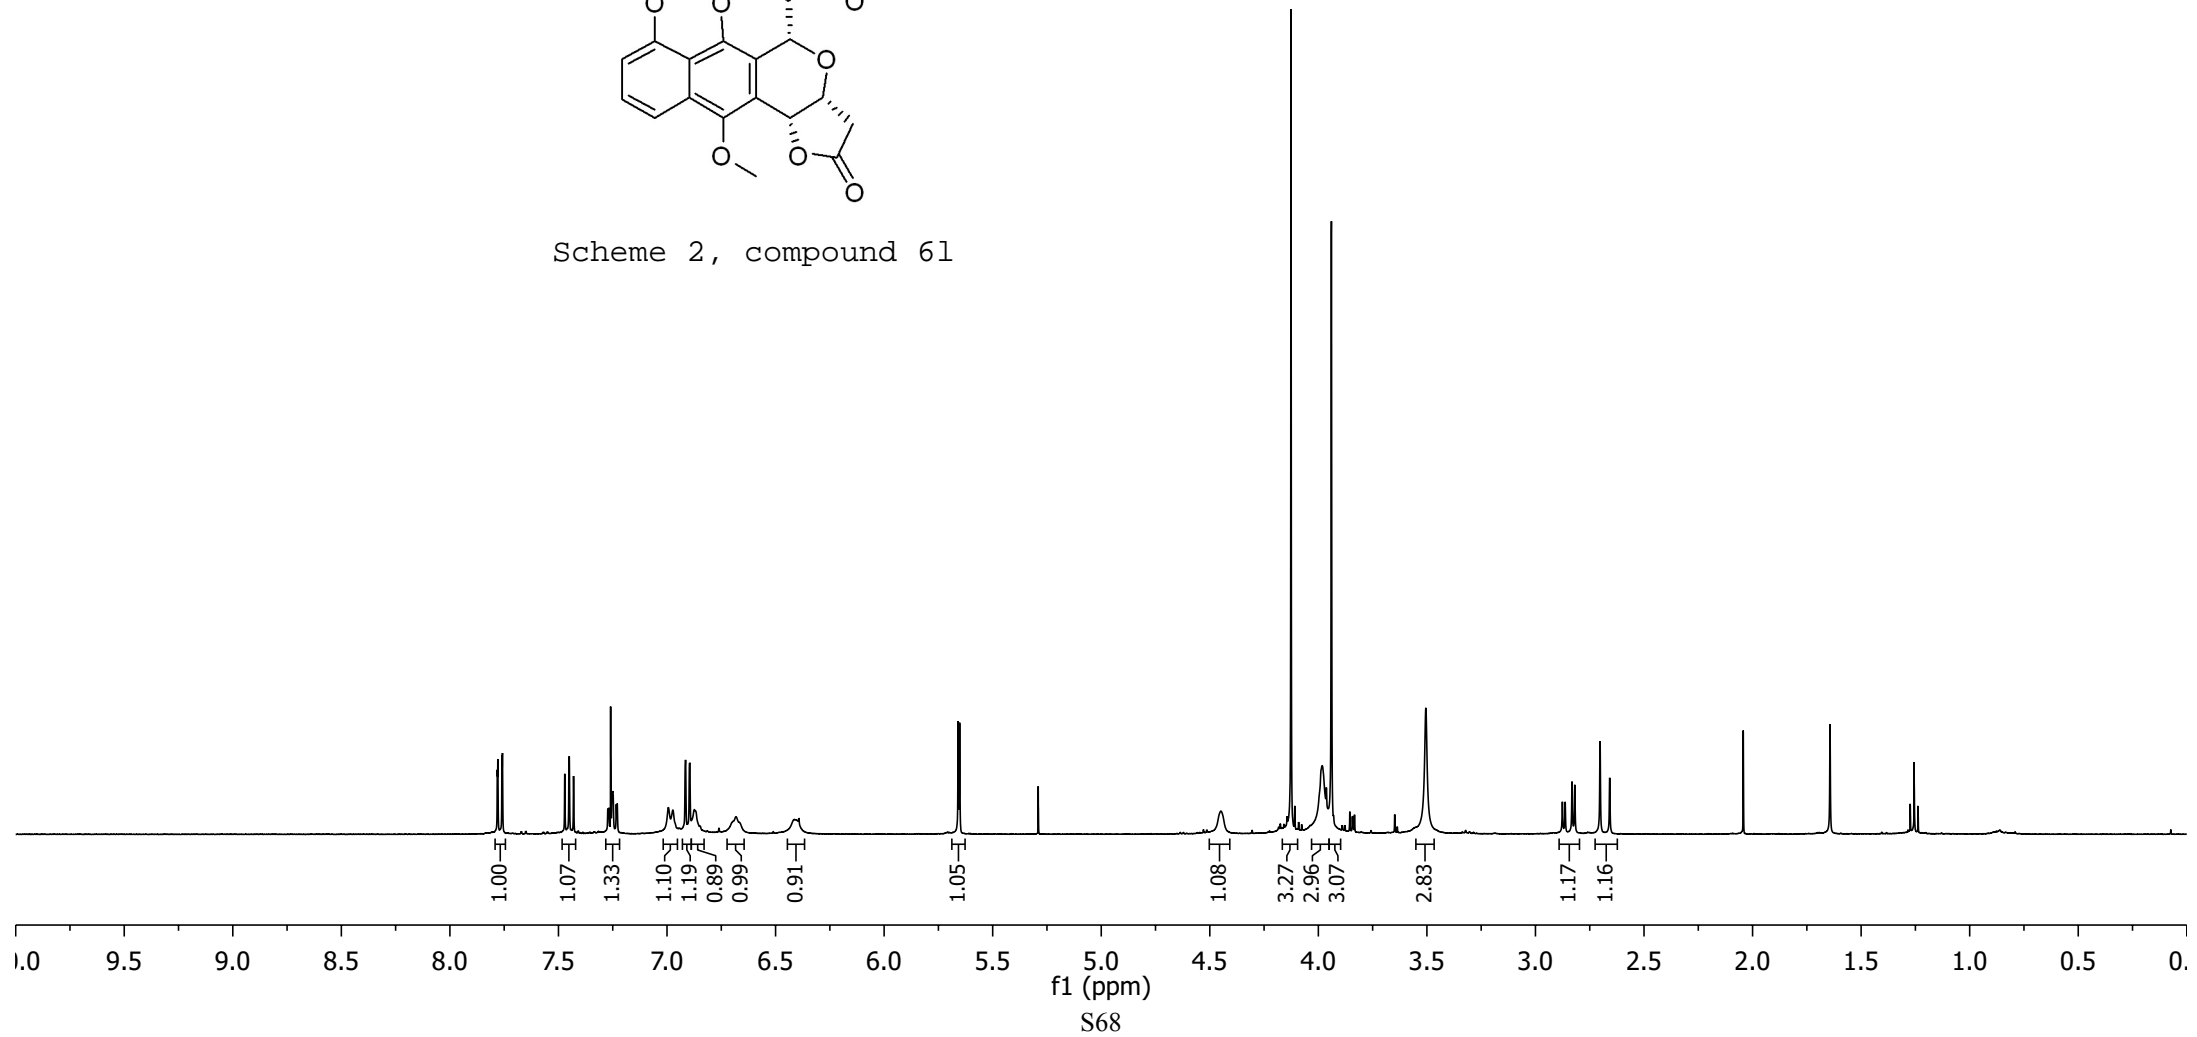

yz-b34

—175.491

—158.137  
—156.334  
—152.800  
—148.393

—130.553  
—129.966  
—129.745  
—129.709  
—127.741  
—126.587  
—125.962  
—121.596  
—120.111  
—119.595  
—115.340  
—111.582  
—106.986

—77.478  
—77.160  
—76.842  
—72.398  
—67.406  
—66.924  
—64.232  
—62.091

—56.183

—37.573

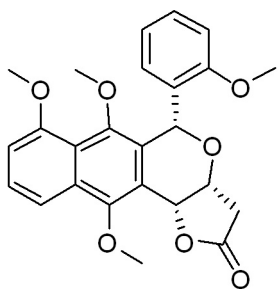

Scheme 2, compound 61

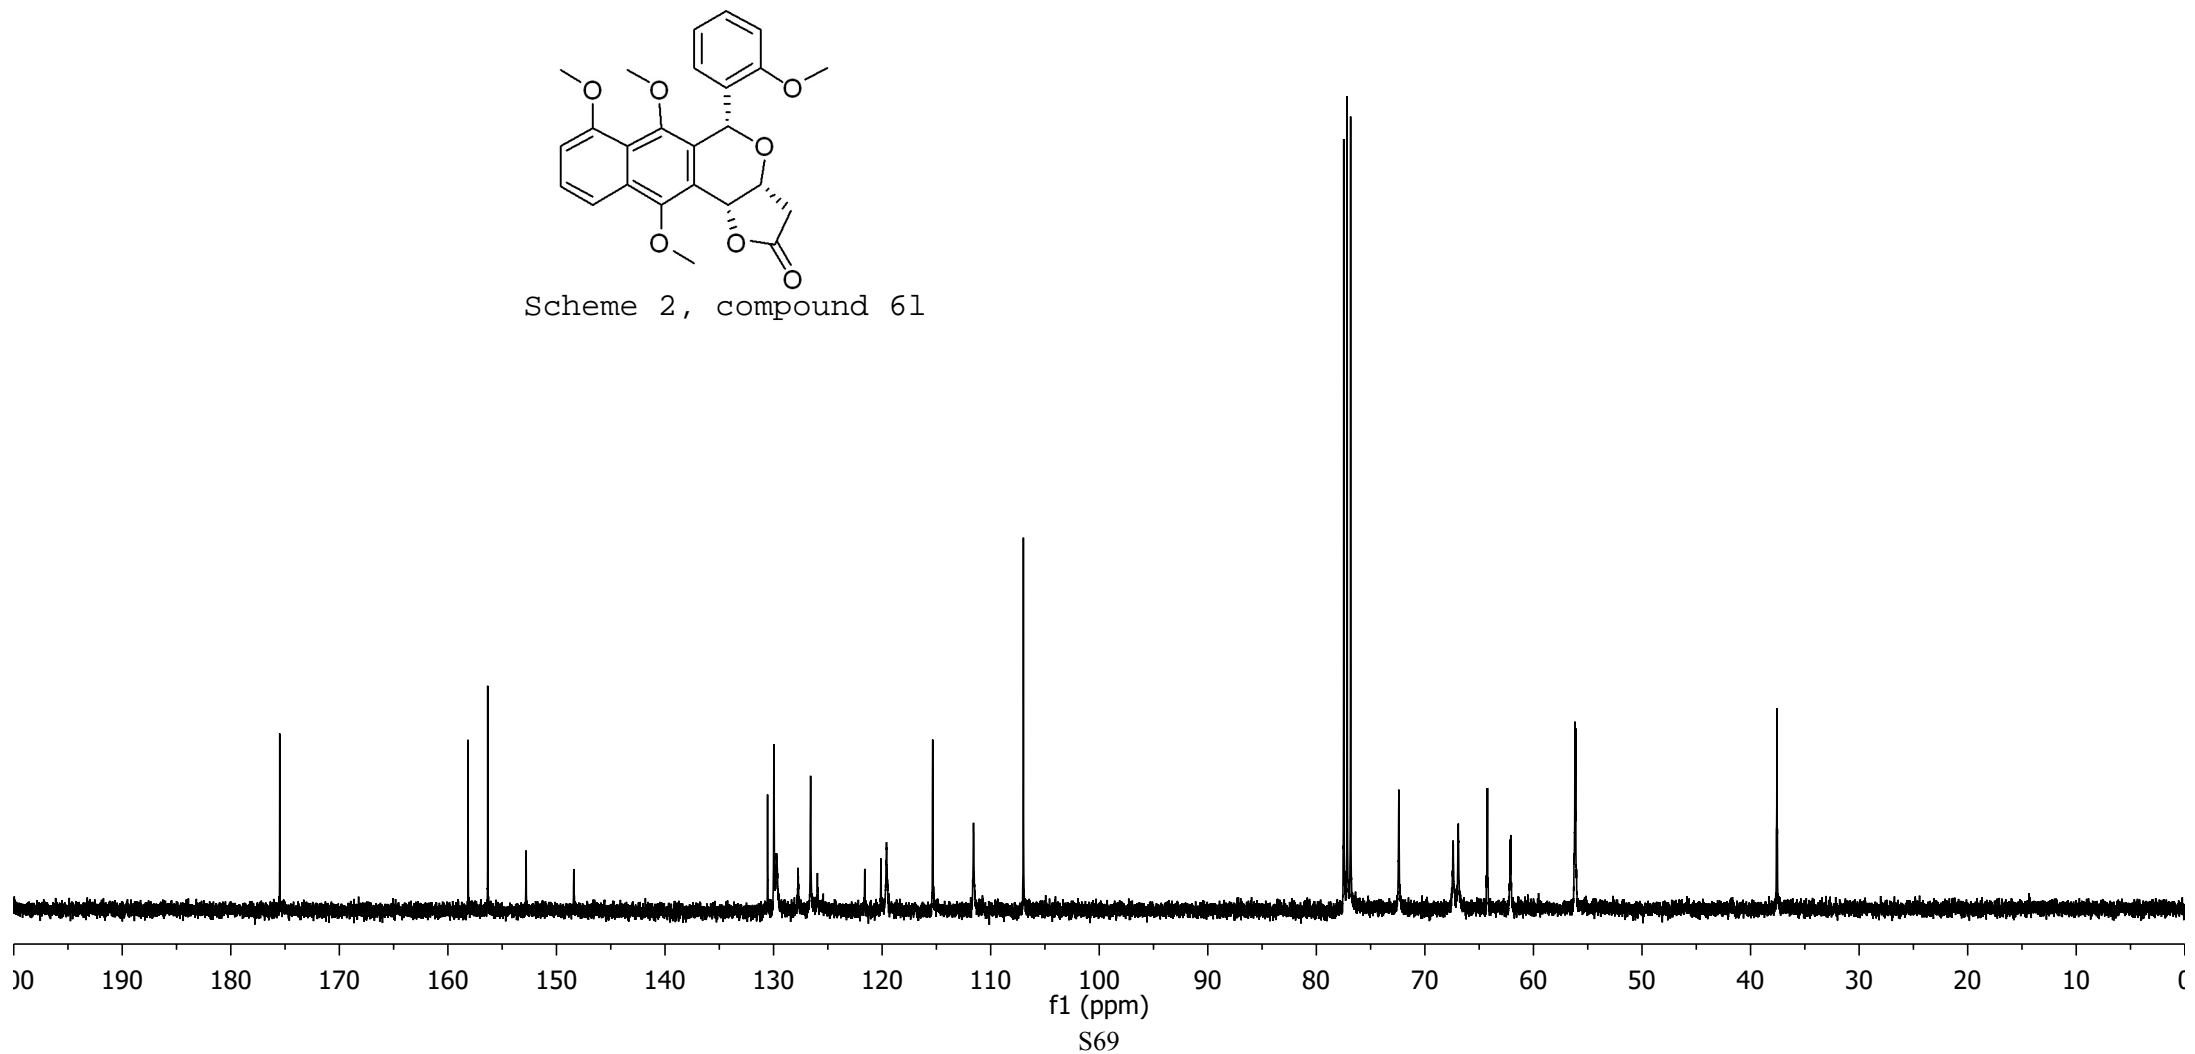

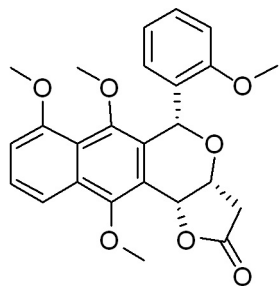

Scheme 2, compound 61

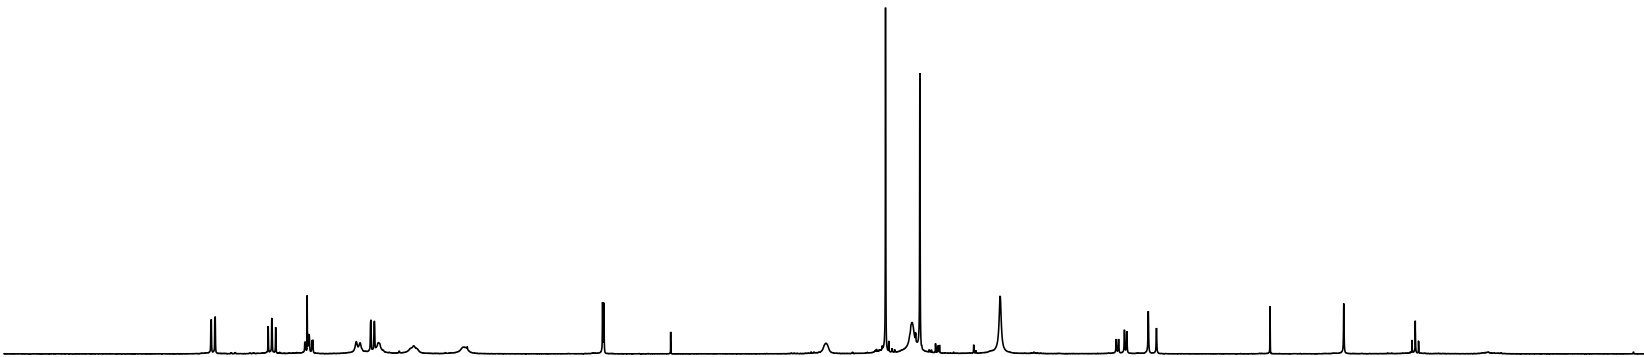

yz-b34

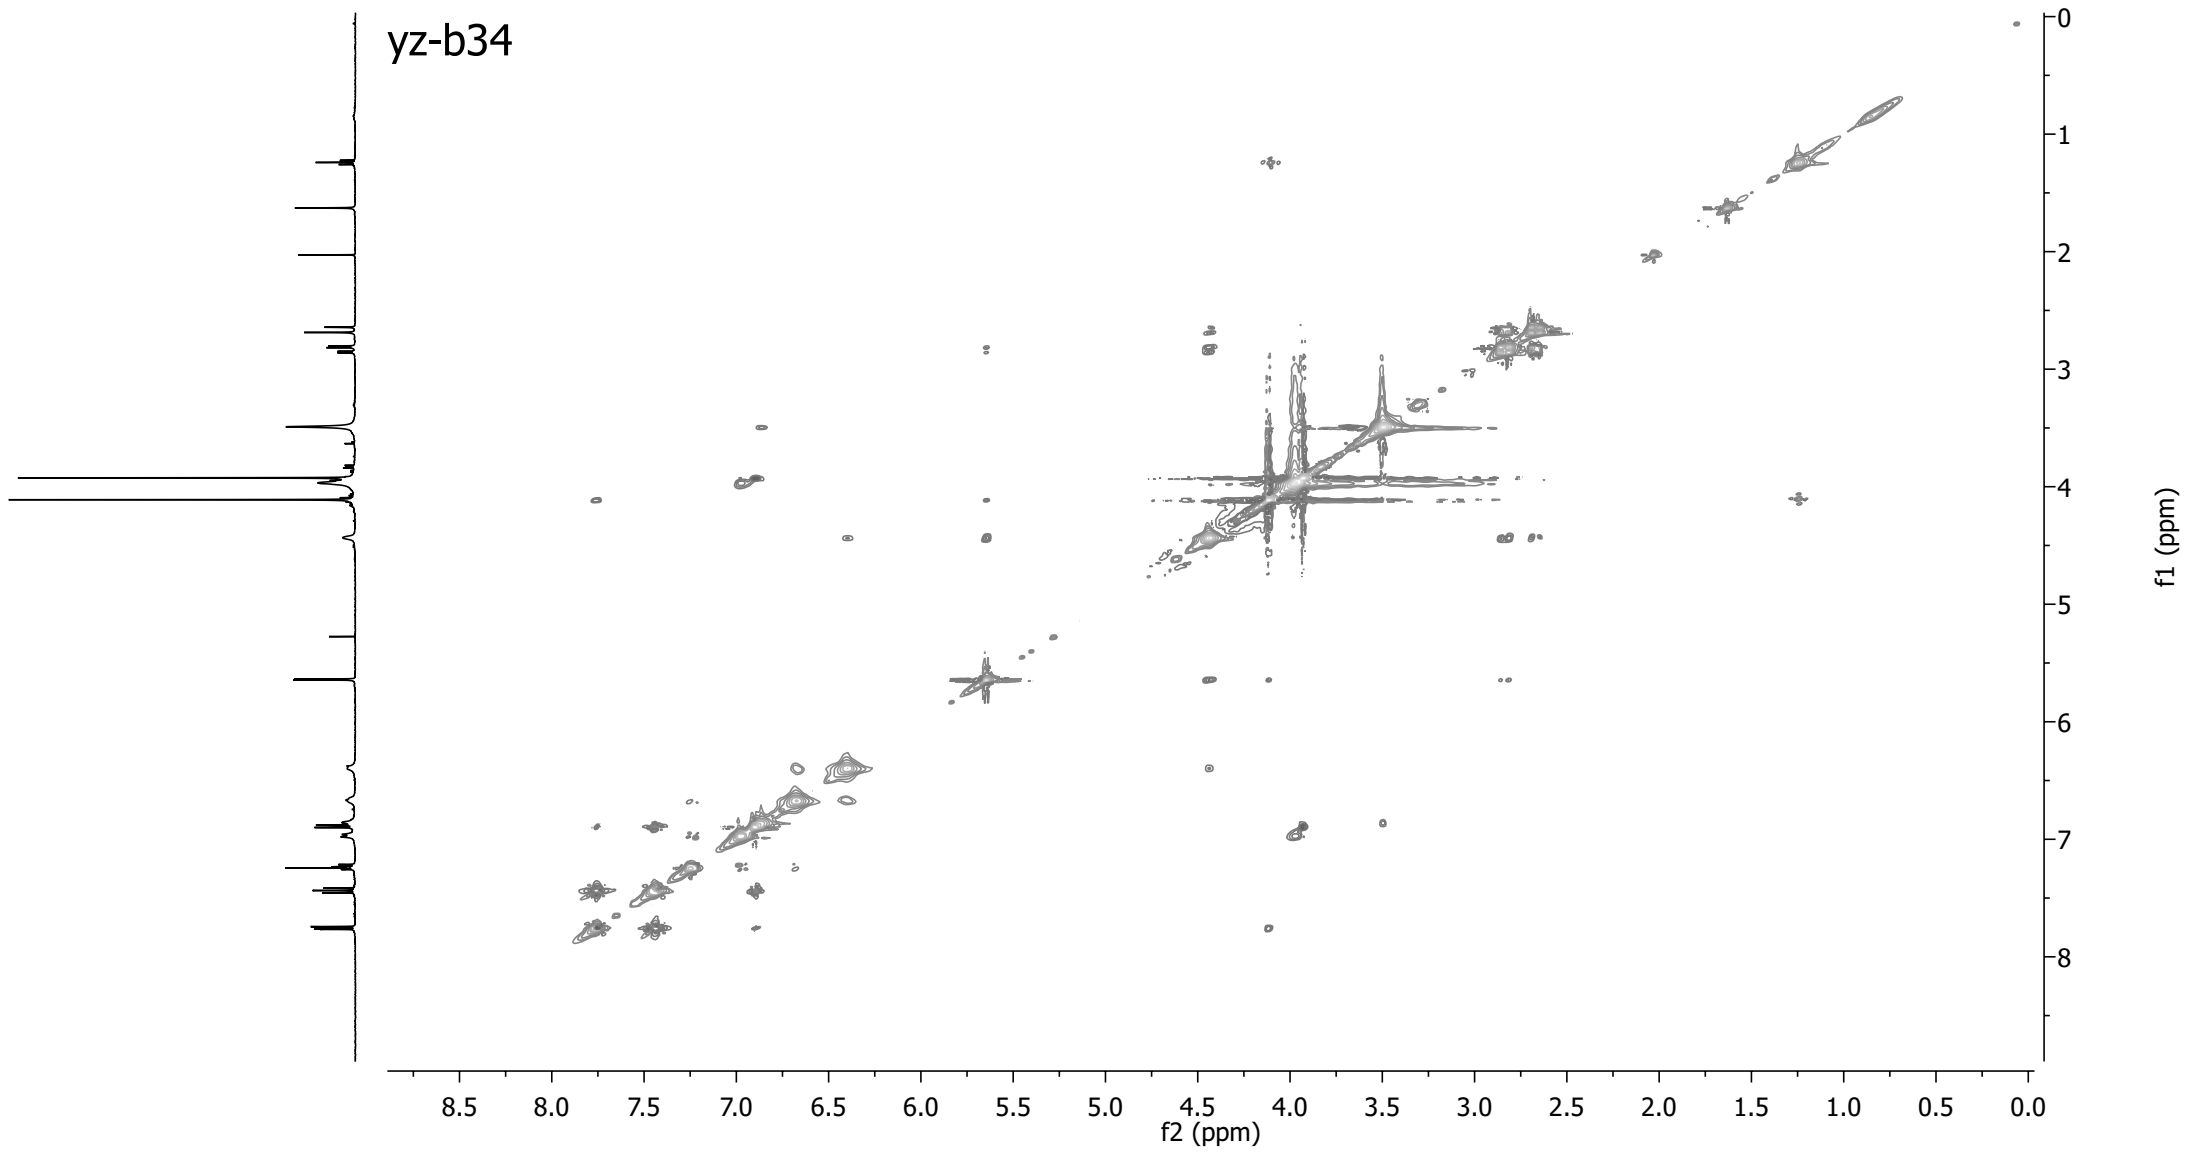

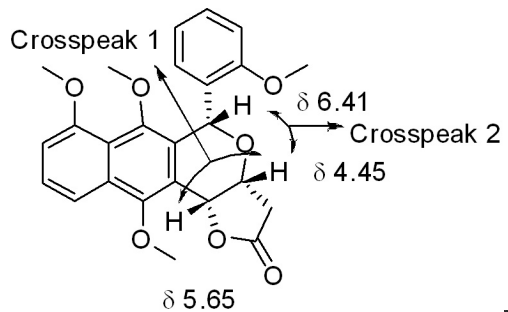

Scheme 2, compound 61

yz-b34

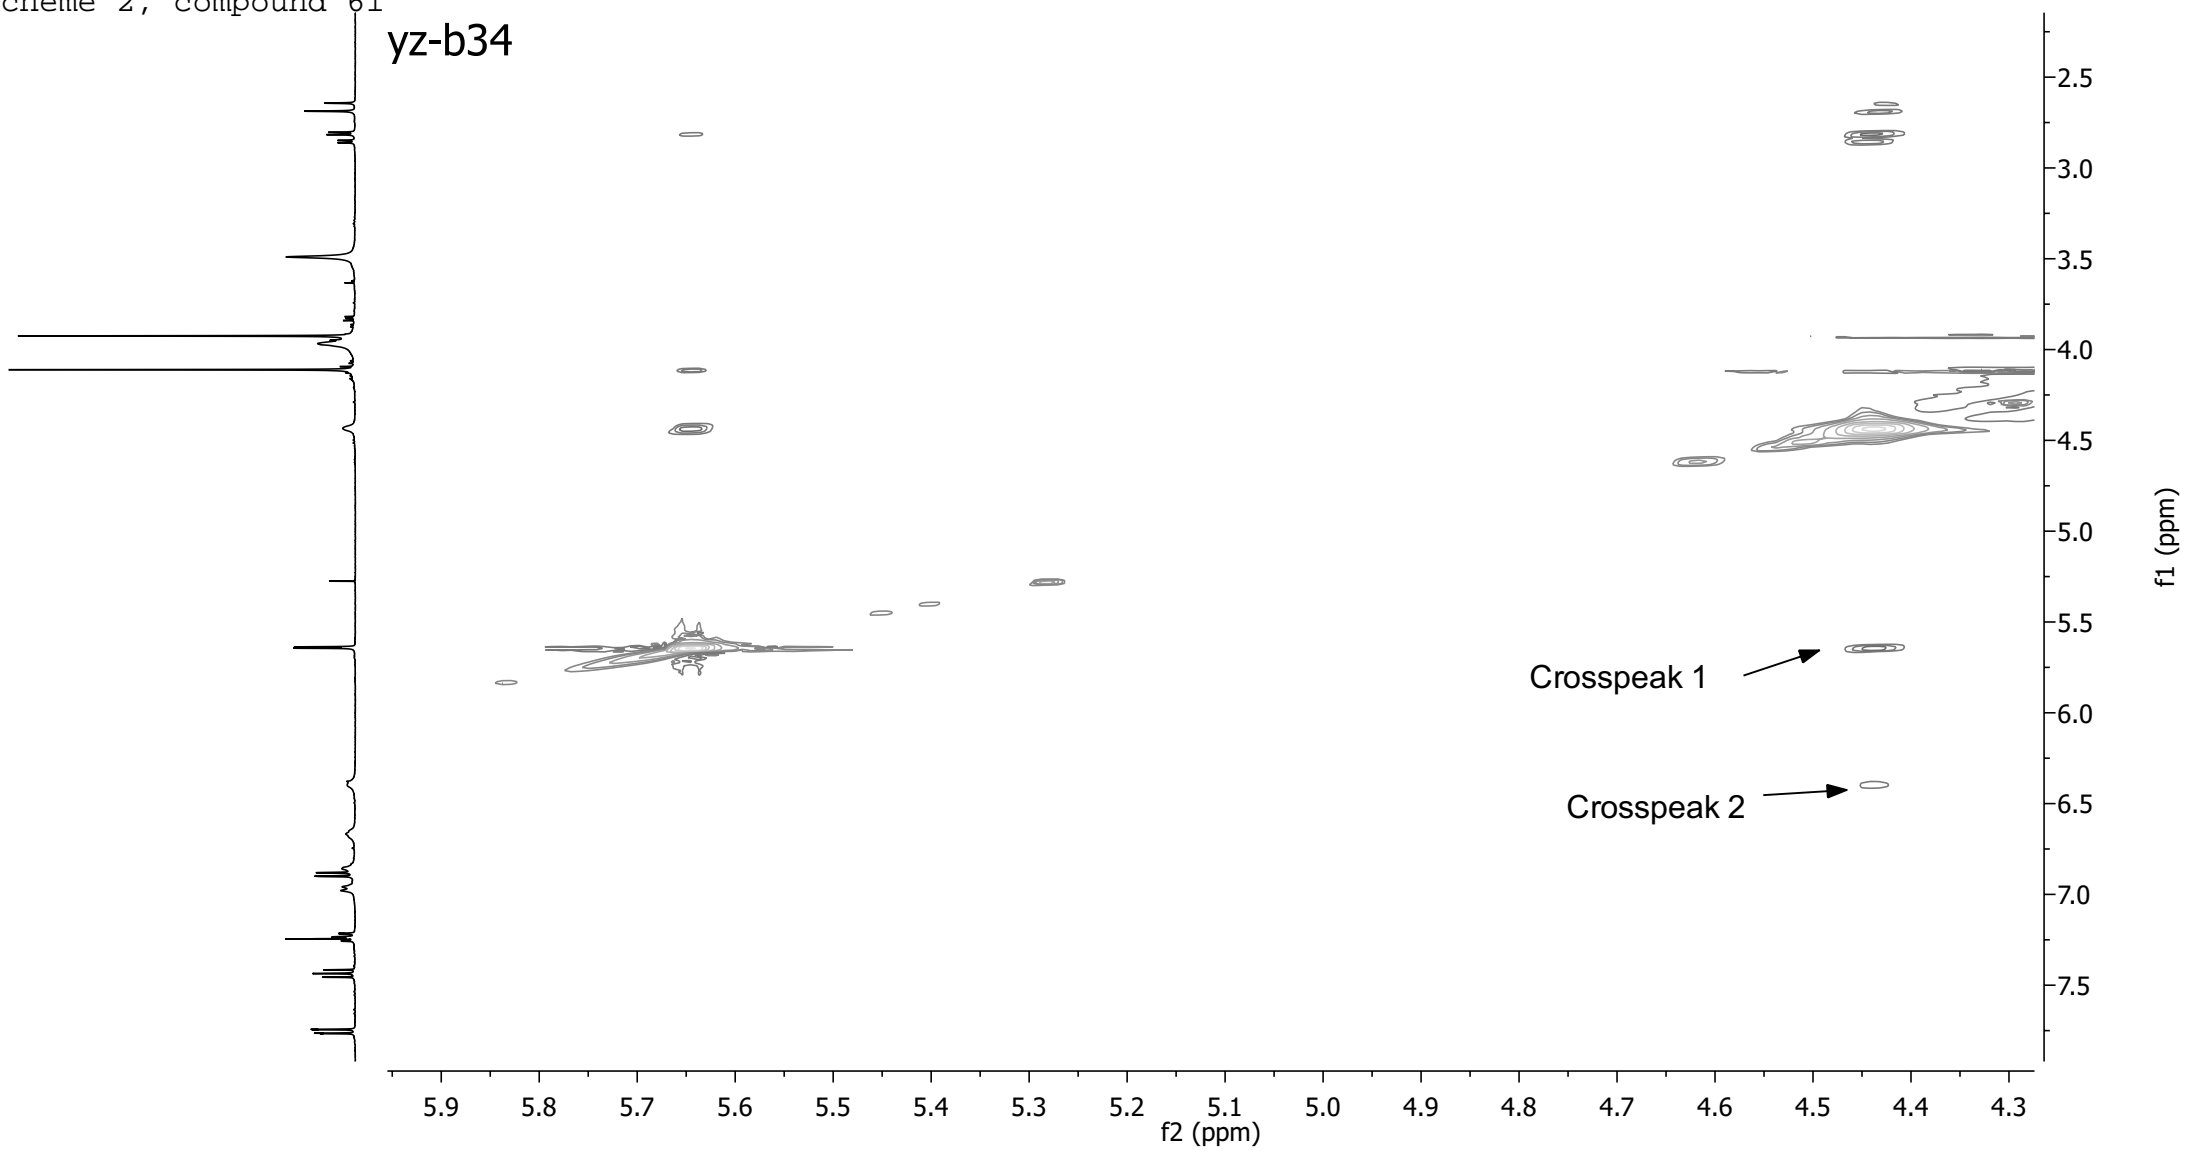

yz-b40

7.724  
7.721  
7.702  
7.700  
7.474  
7.455  
7.453  
7.434  
7.260  
6.940  
6.938  
6.920  
6.919

5.898  
5.577  
5.569

4.922  
4.915  
4.909  
4.902

4.040  
4.007  
3.862  
3.595

3.037  
3.022  
2.991  
2.978  
2.786  
2.742

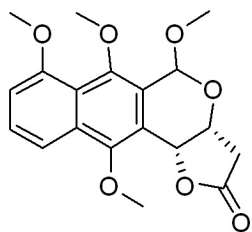

Scheme 3, compound 8

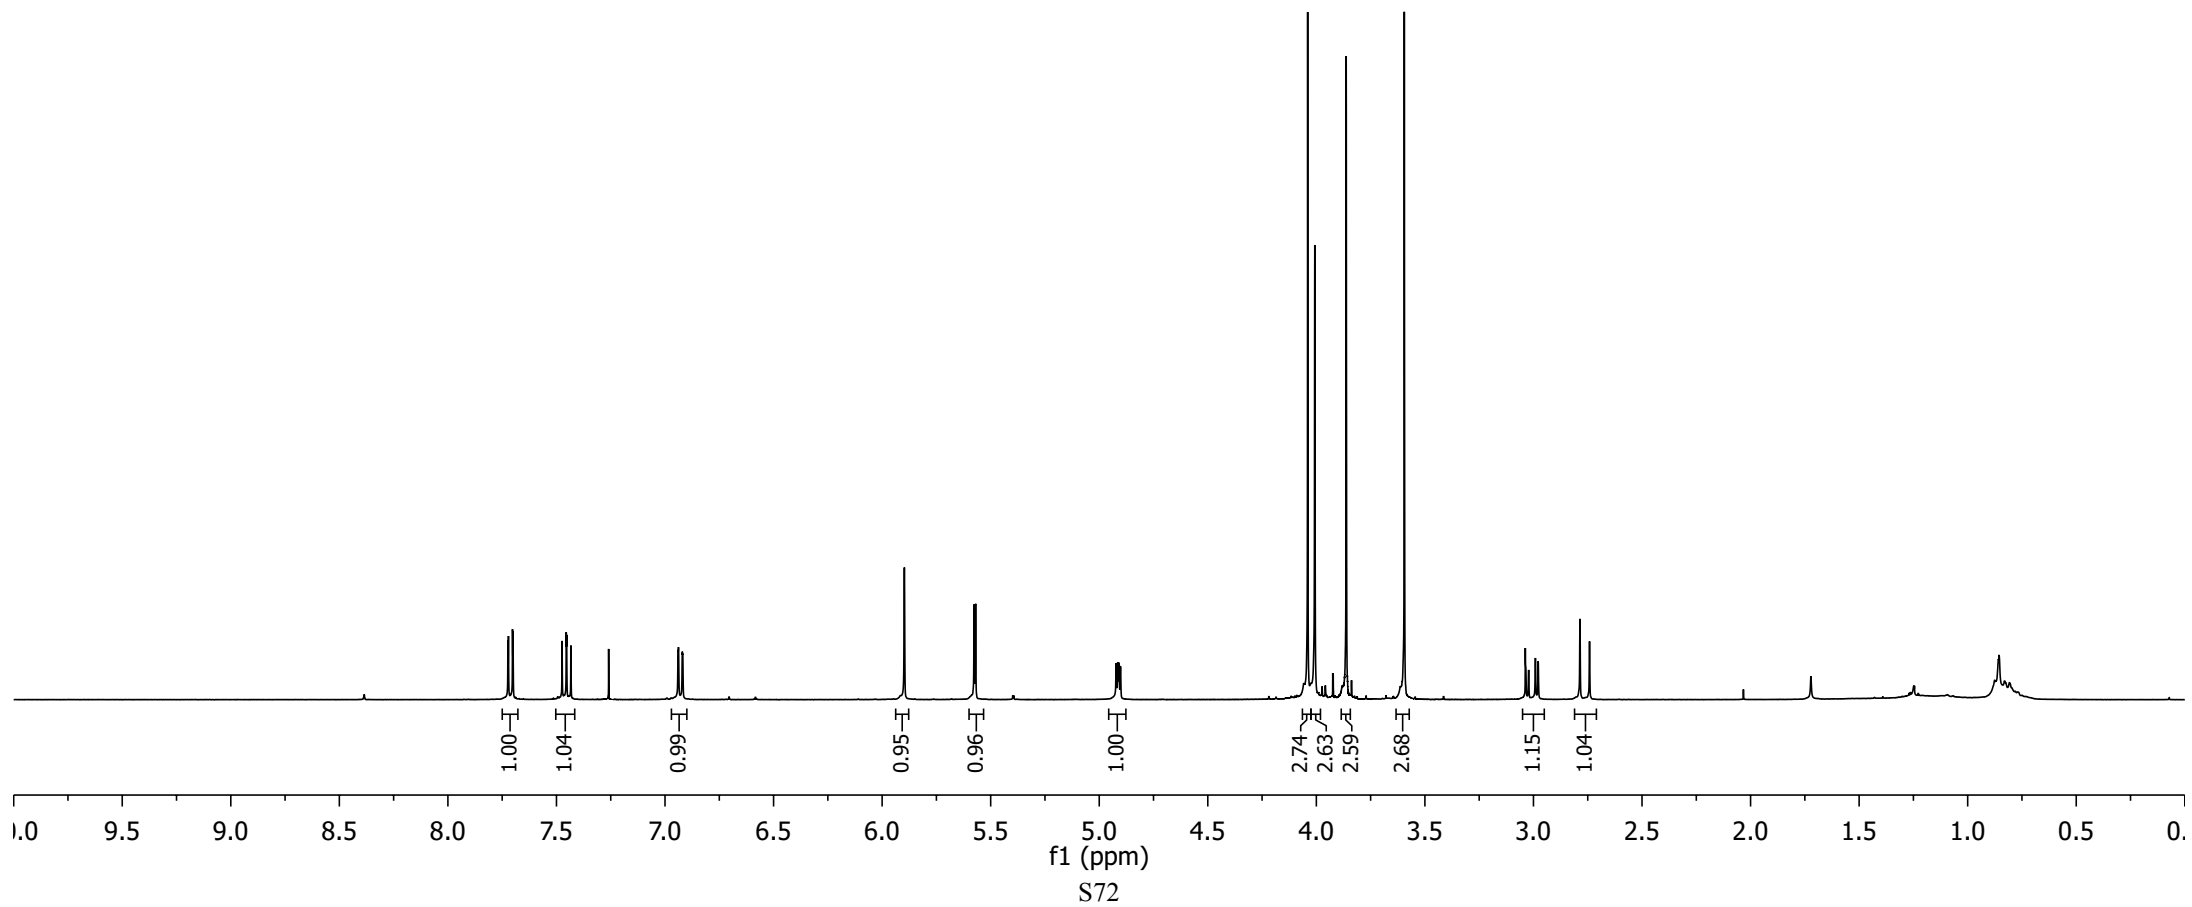



yz-b40

—175.237

~156.561  
~152.664  
~150.288

~131.331  
~127.212  
~123.528  
~121.564  
~118.123  
~115.343

—107.180

—94.979

~77.478  
~77.160  
~76.841  
—71.848

~65.830  
~64.038  
~63.326

~56.252  
~55.915

—37.216

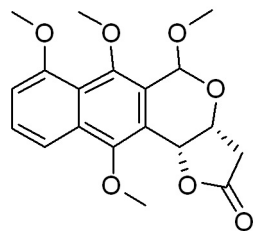

Scheme 3, compound 8

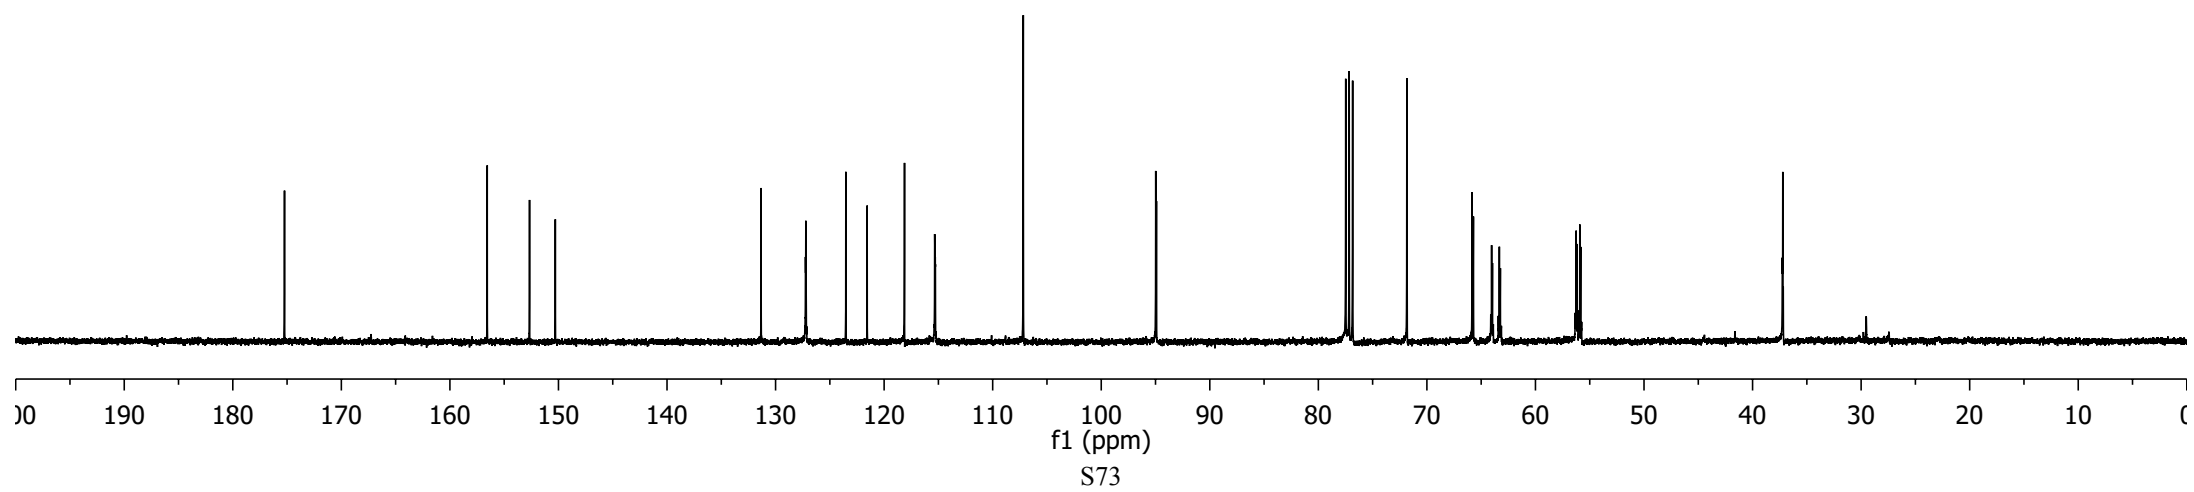

yz-a150

7.721 7.700 7.457 7.437 7.262 7.091 6.995 6.926  
5.999 5.974 5.956 5.931 5.589 5.582 5.291 5.290 5.188 5.142 4.726 4.719 4.714 4.707  
4.060 4.023 3.860  
2.995 2.982 2.951 2.938 2.734 2.690 2.546 2.528 2.518 2.500 2.040 2.038  
—1.669  
1.252 1.251

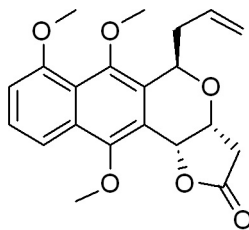

Scheme 3, compound 6fb

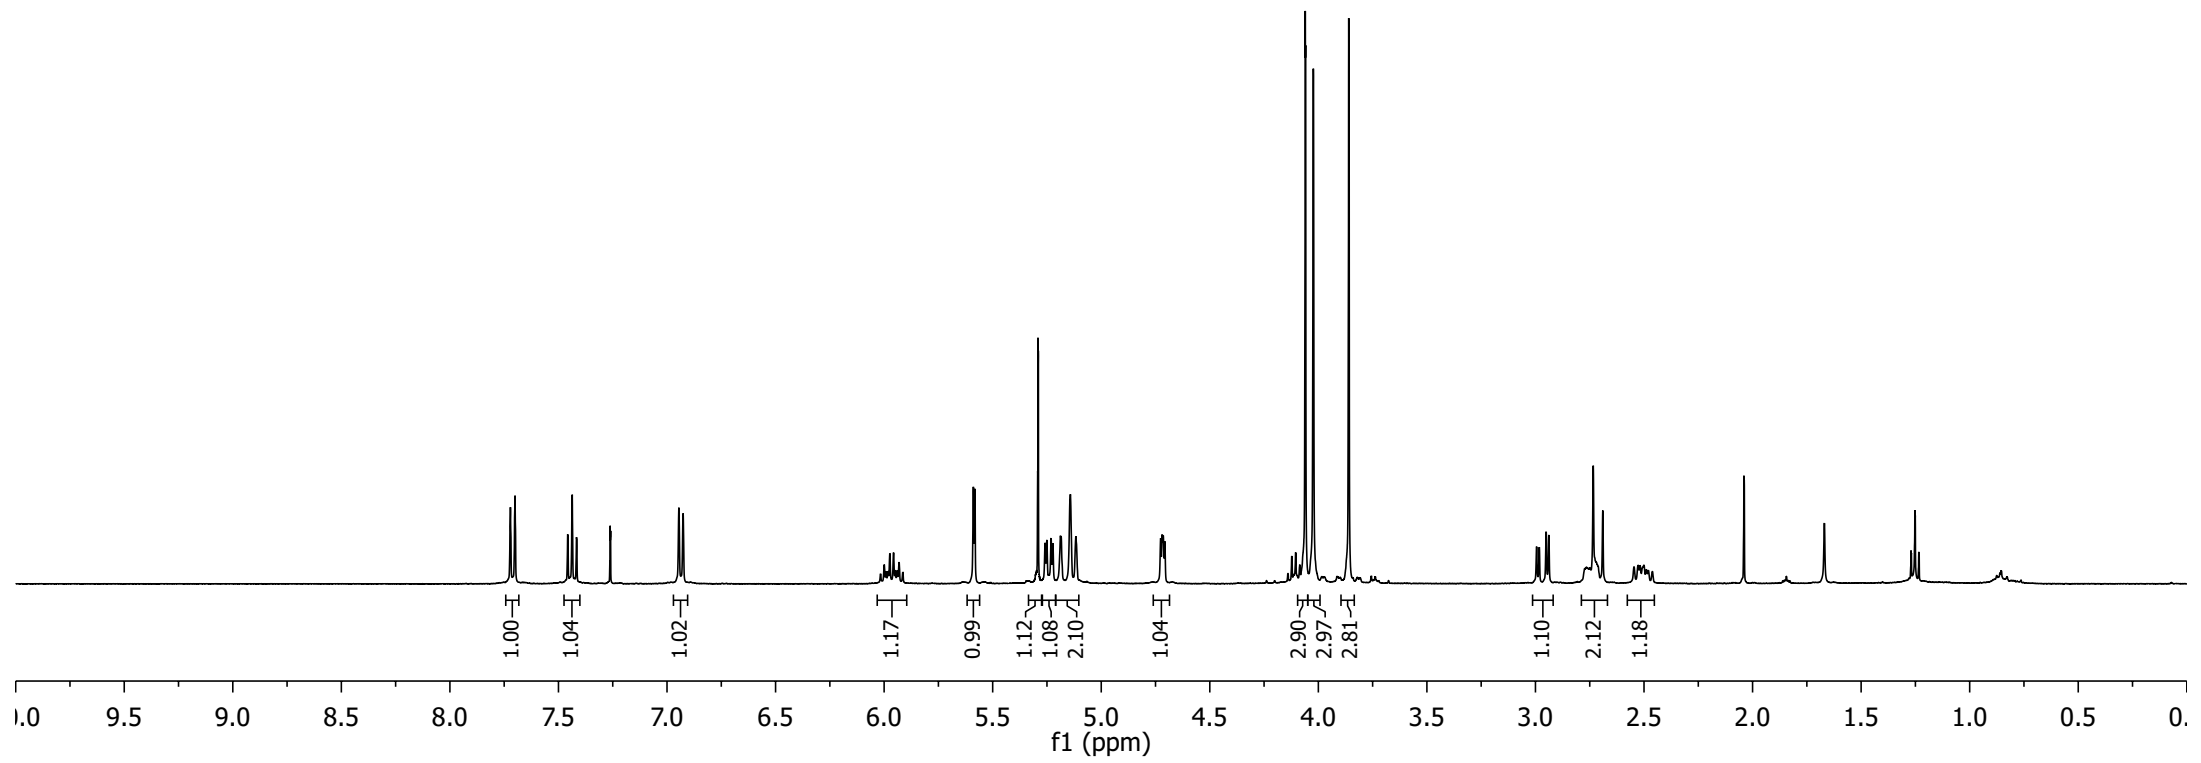

yz-a150

—175.263

—156.038

—153.052

—147.641

—134.930

—130.161

—127.165

—126.454

—121.464

—118.472

—116.956

—115.181

—106.961

—77.339

—77.021

—76.703

—71.881

—71.406

—66.064

—63.926

—62.461

—56.114

—37.669

—37.294

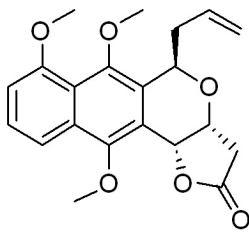

Scheme 3, compound 6fb

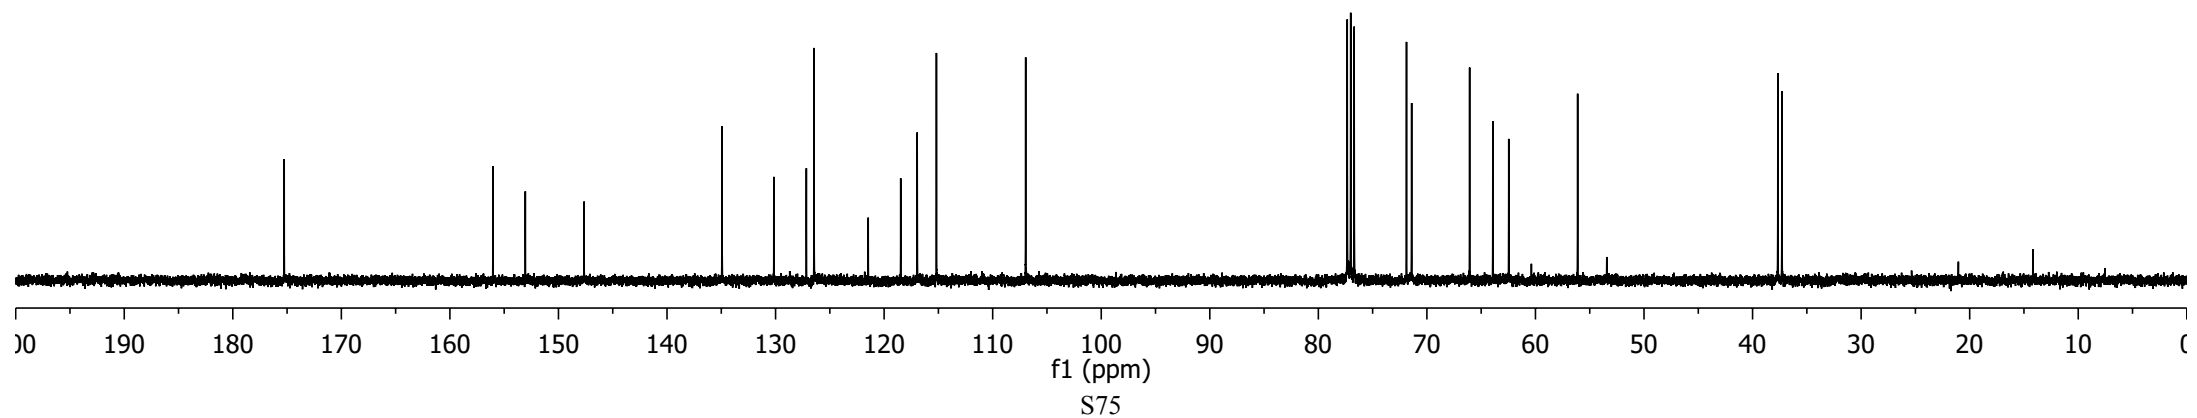

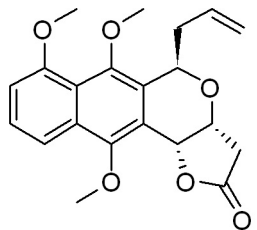

Scheme 3, compound 6fb

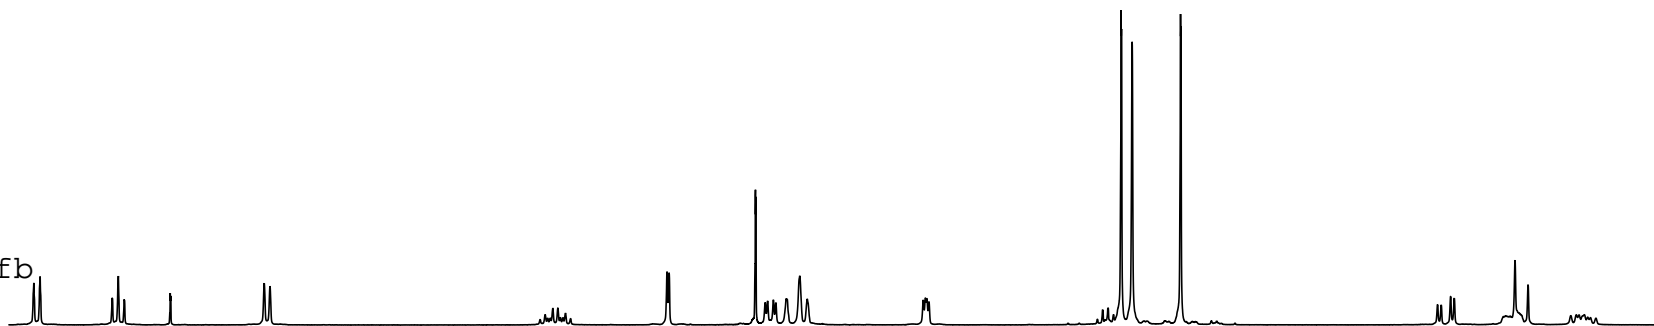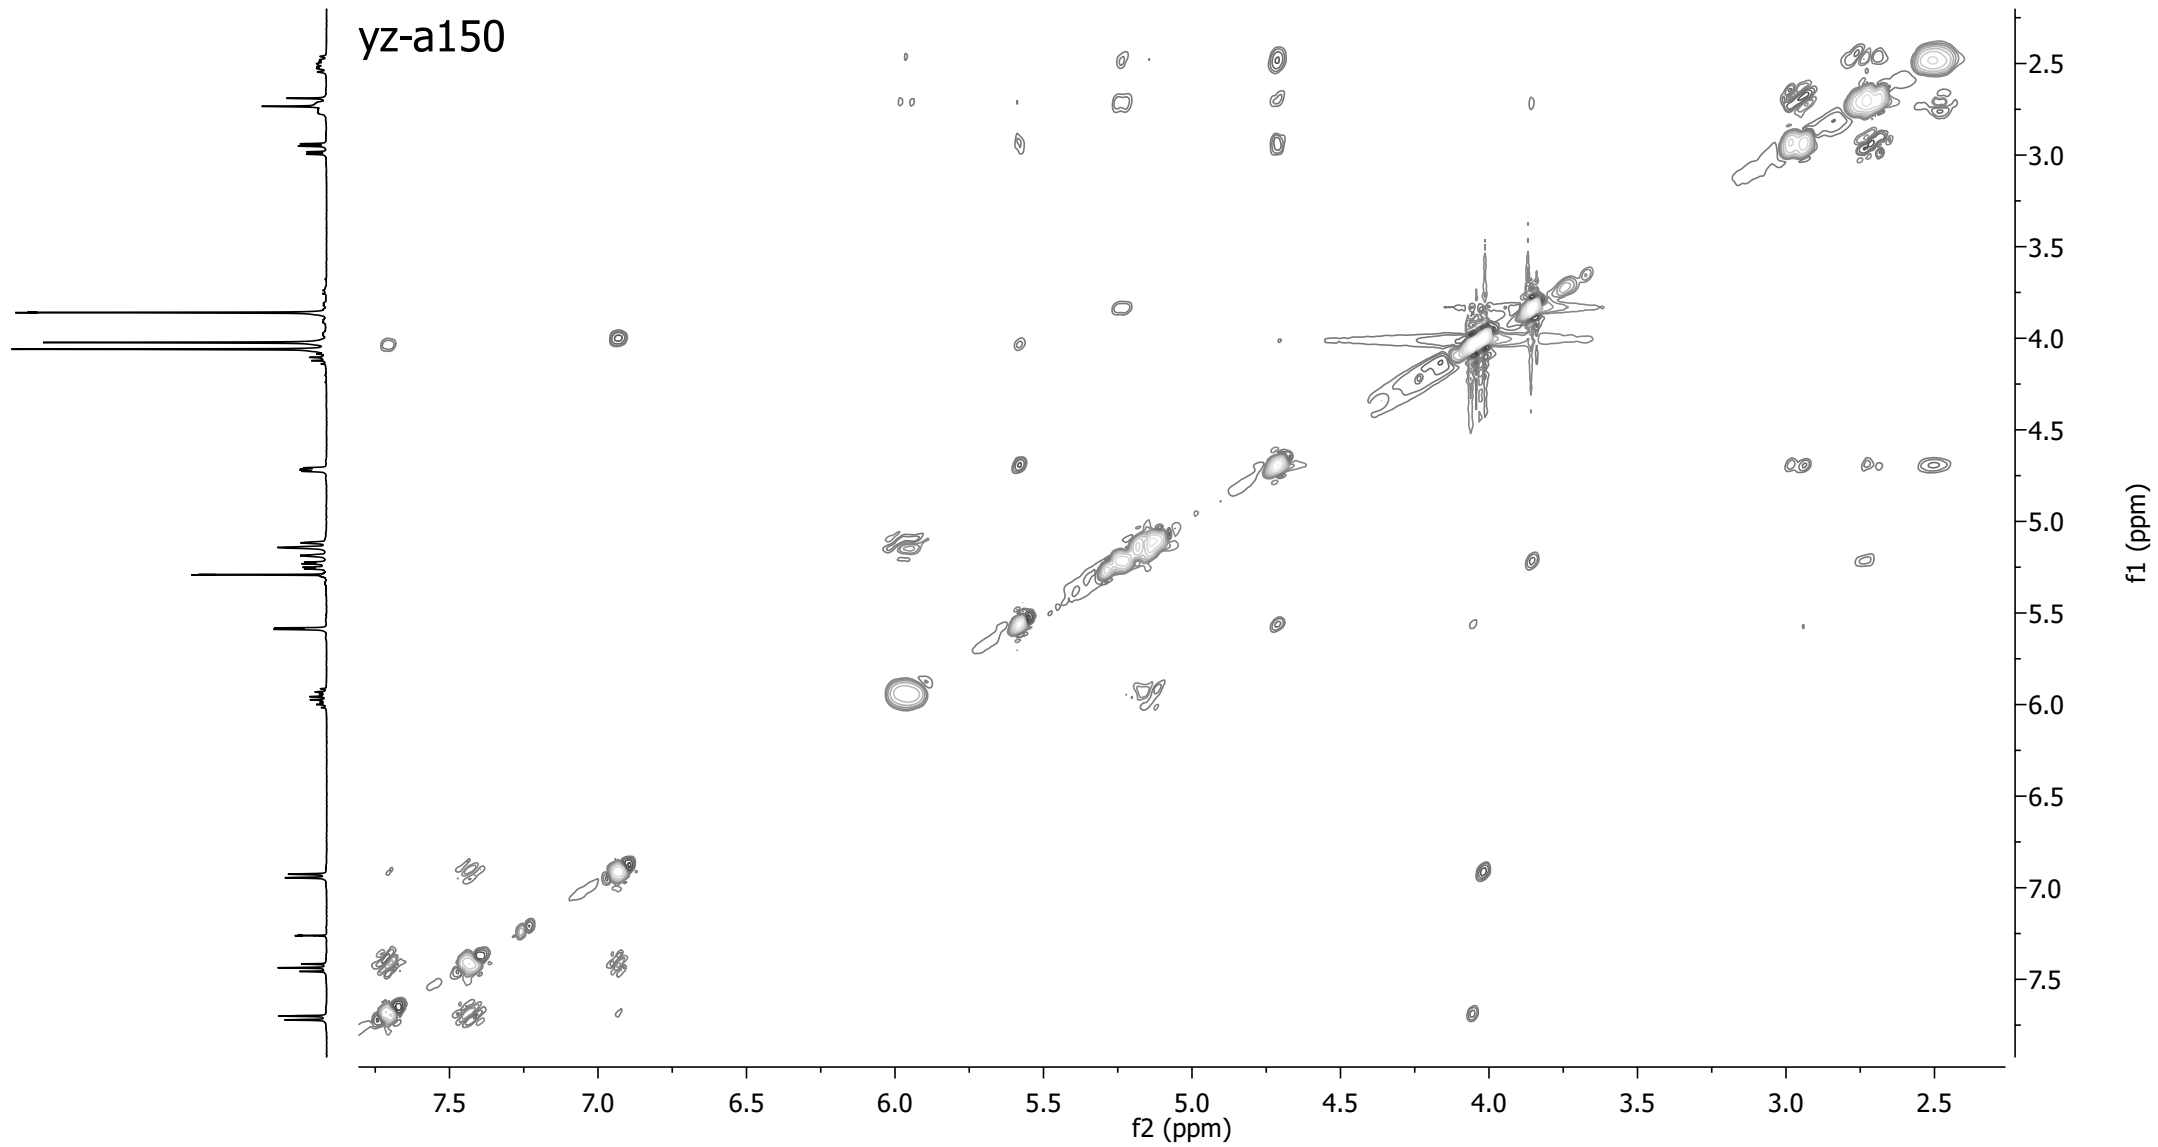

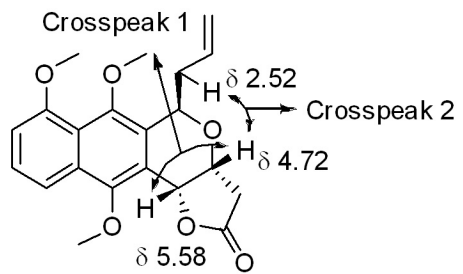

Scheme 3, compound 6fb

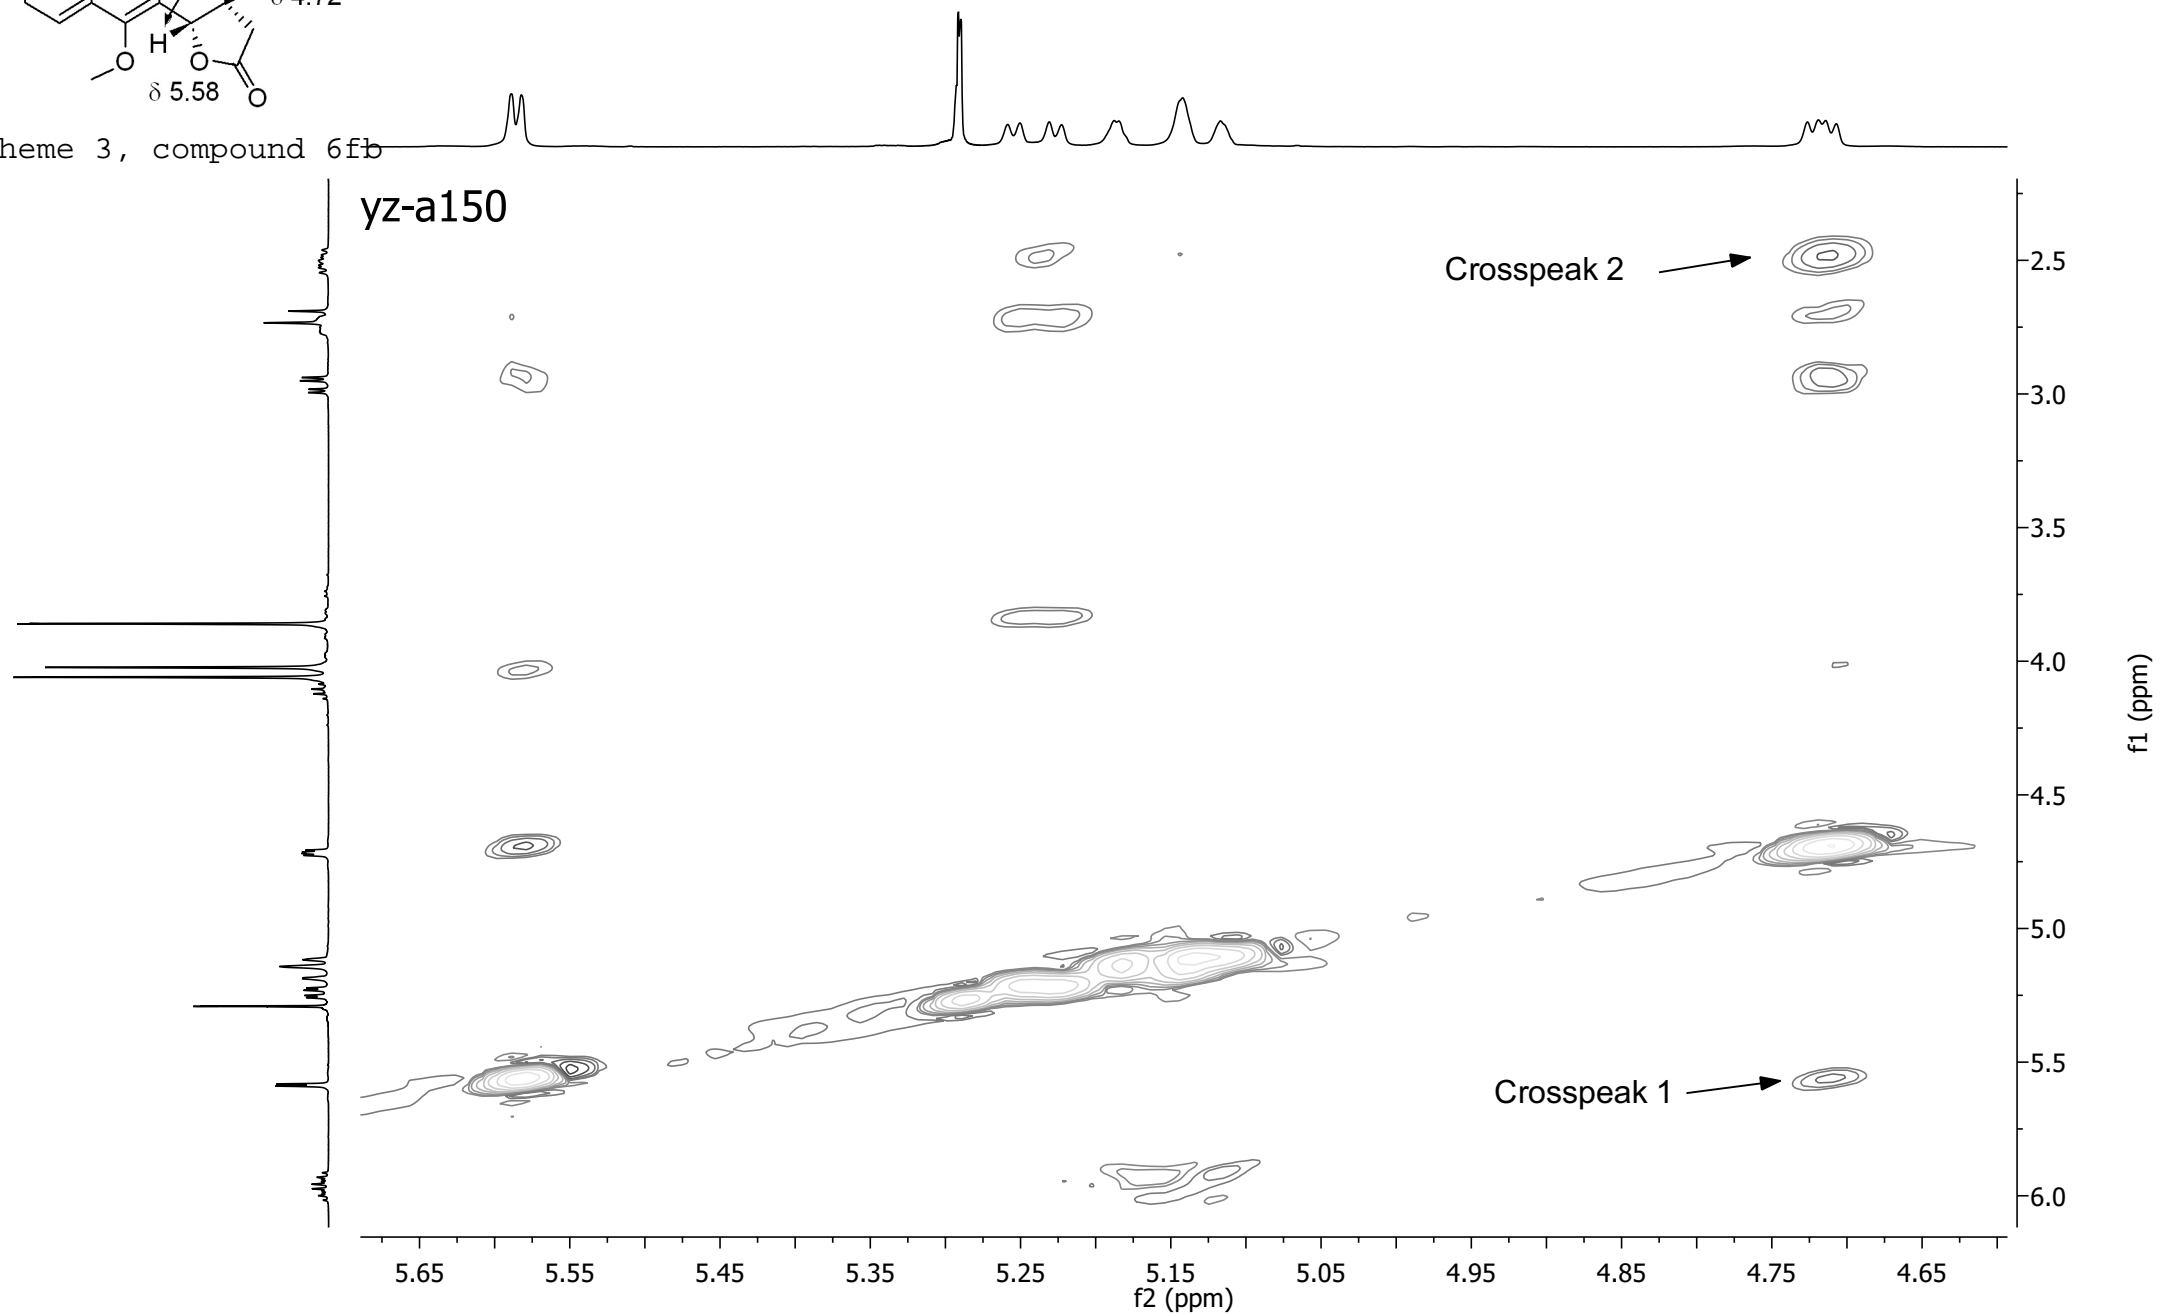

yz-b1

7.708  
7.689  
7.470  
7.450  
7.431  
6.962  
6.944  
5.663  
5.187  
5.164  
4.716  
4.050  
4.013  
3.887  
3.100  
3.092  
3.056  
3.047  
2.833  
2.789  
2.258  
1.806  
1.740  
1.581  
1.565  
1.550  
1.321  
1.006  
0.990

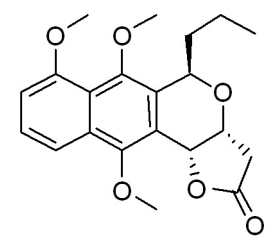

Scheme 3, compound 6ab

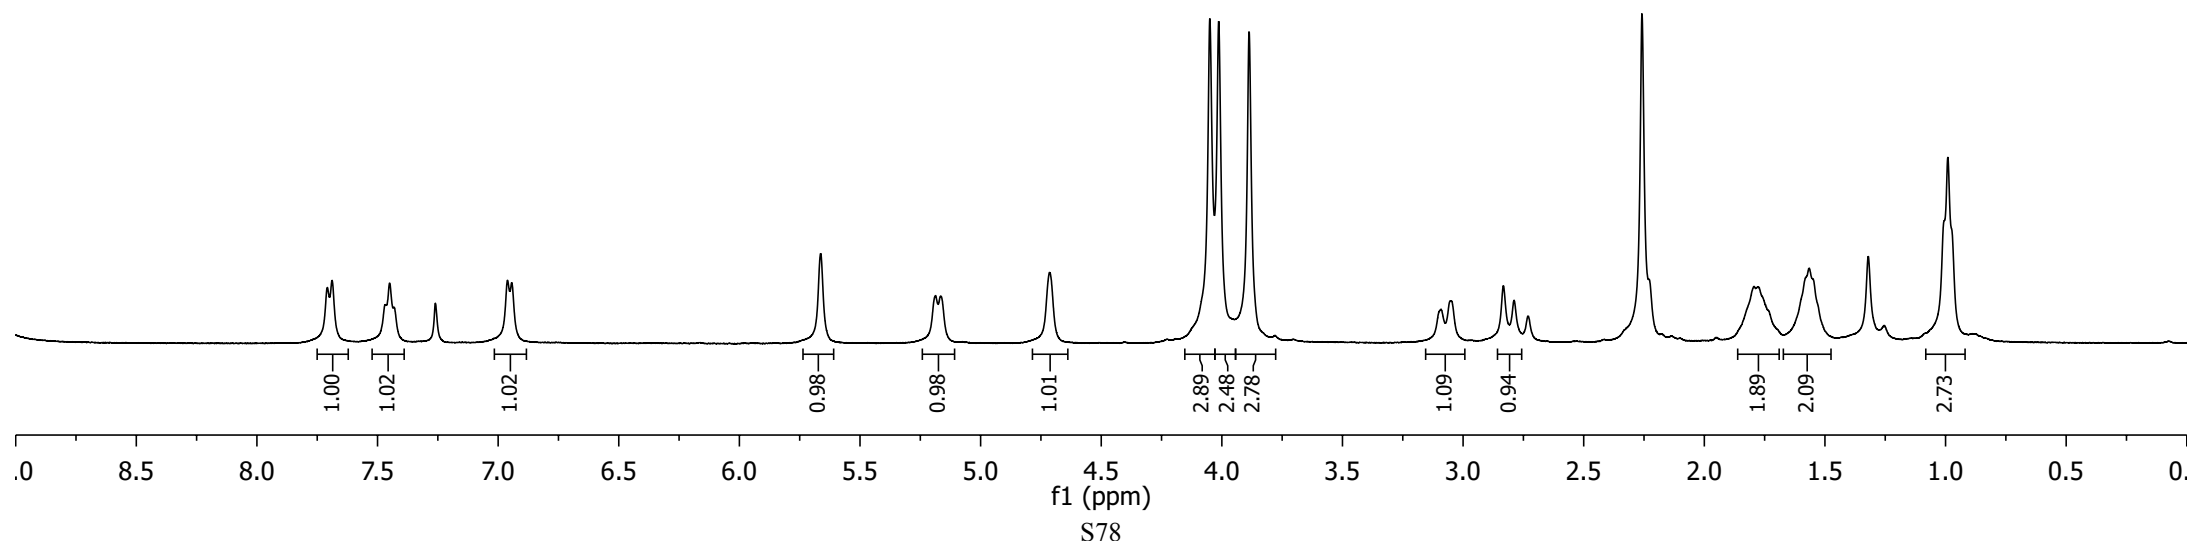

yz-b1

—178.231  
—155.979  
—153.313  
—147.147  
—130.091  
—128.334  
—126.795  
—121.579  
—118.007  
—115.330  
—107.328  
77.478  
77.160  
76.842  
73.481  
71.501  
66.000  
64.042  
62.703  
—56.151  
—38.109  
—34.908  
—19.549  
—13.557

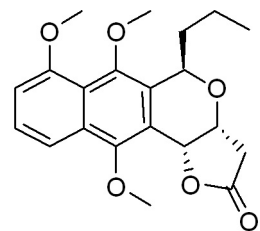

Scheme 3, compound 6ab

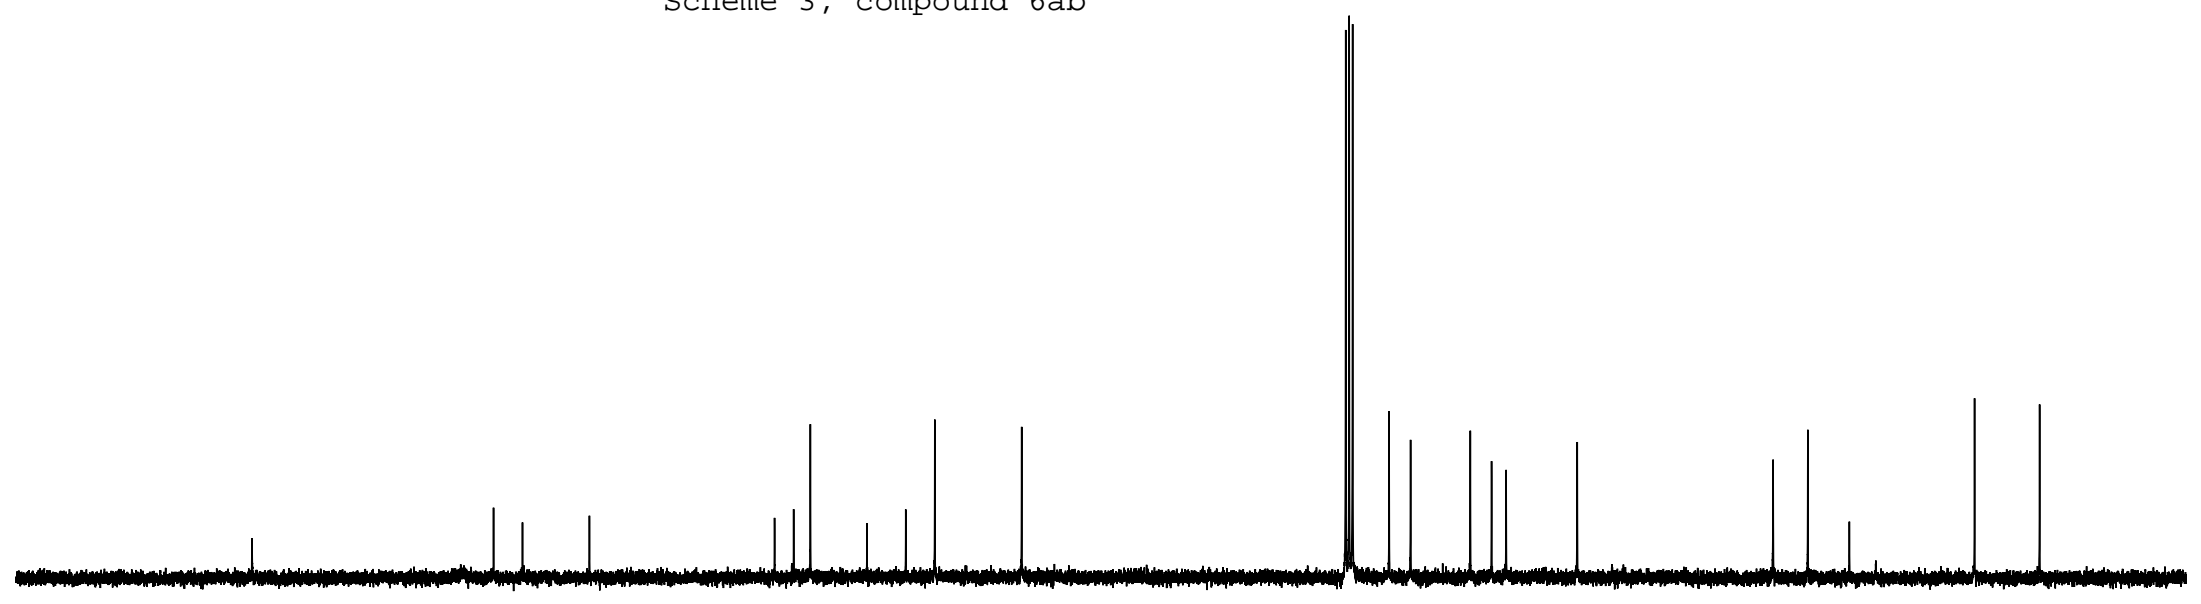

f1 (ppm)

S79

yz-b49(DMSO-d6)

7.717  
7.696  
7.632  
7.612  
7.591

7.185  
7.166

6.475

5.735  
5.728

4.849  
4.843  
4.837  
4.831

3.985  
3.966  
3.845

3.393  
3.381  
3.349  
3.334  
3.310

2.697  
2.653  
2.508  
2.504  
2.500  
2.495

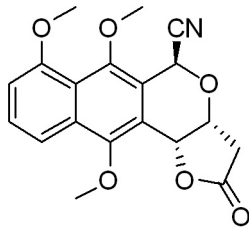

Scheme 3, compound 12

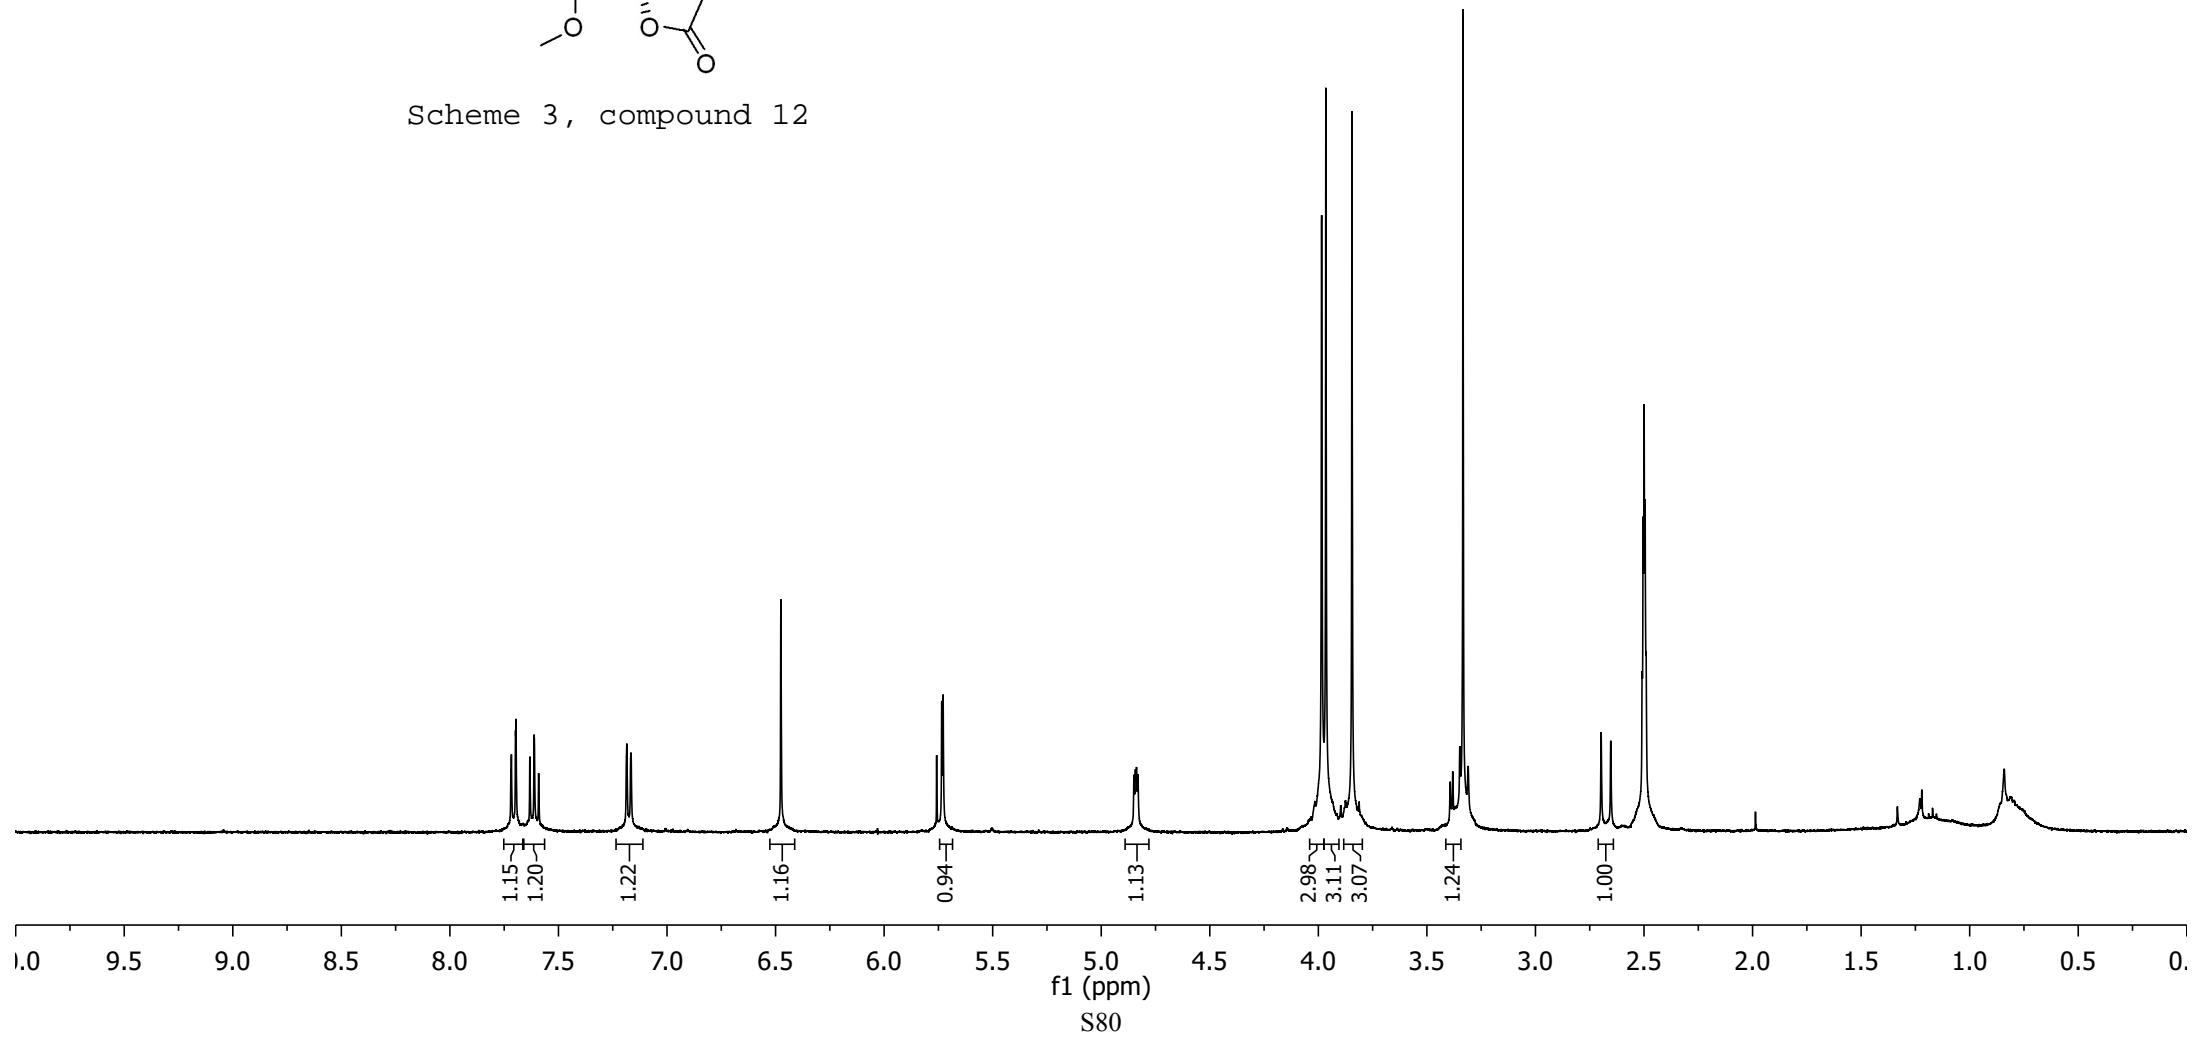



yz-b49(DMSO-d6)

174.200

155.894

152.479

148.793

130.625

128.252

120.314

118.350

117.617

117.297

114.647

108.147

71.513

70.267

63.428

62.450

60.316

56.212

40.147

39.938

39.729

39.520

39.311

39.103

38.895

36.798

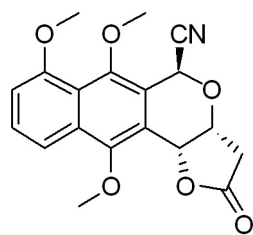

Scheme 3, compound 12

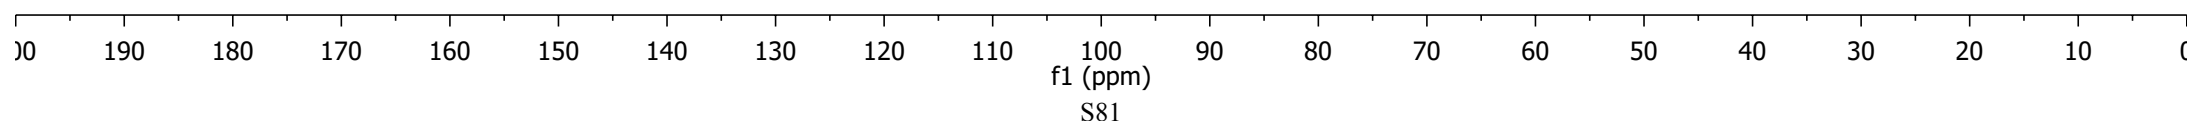

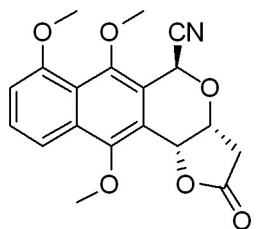

Scheme 3, compound 12

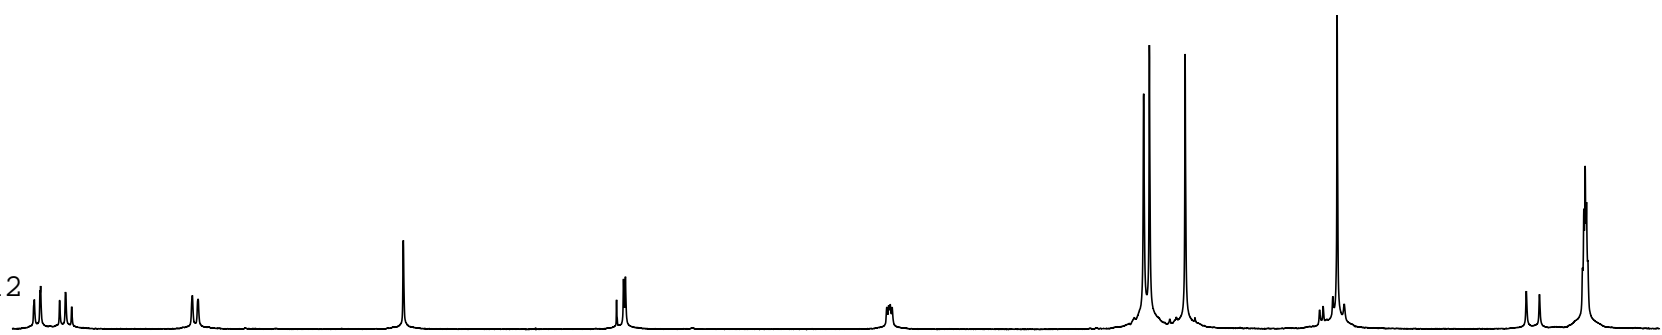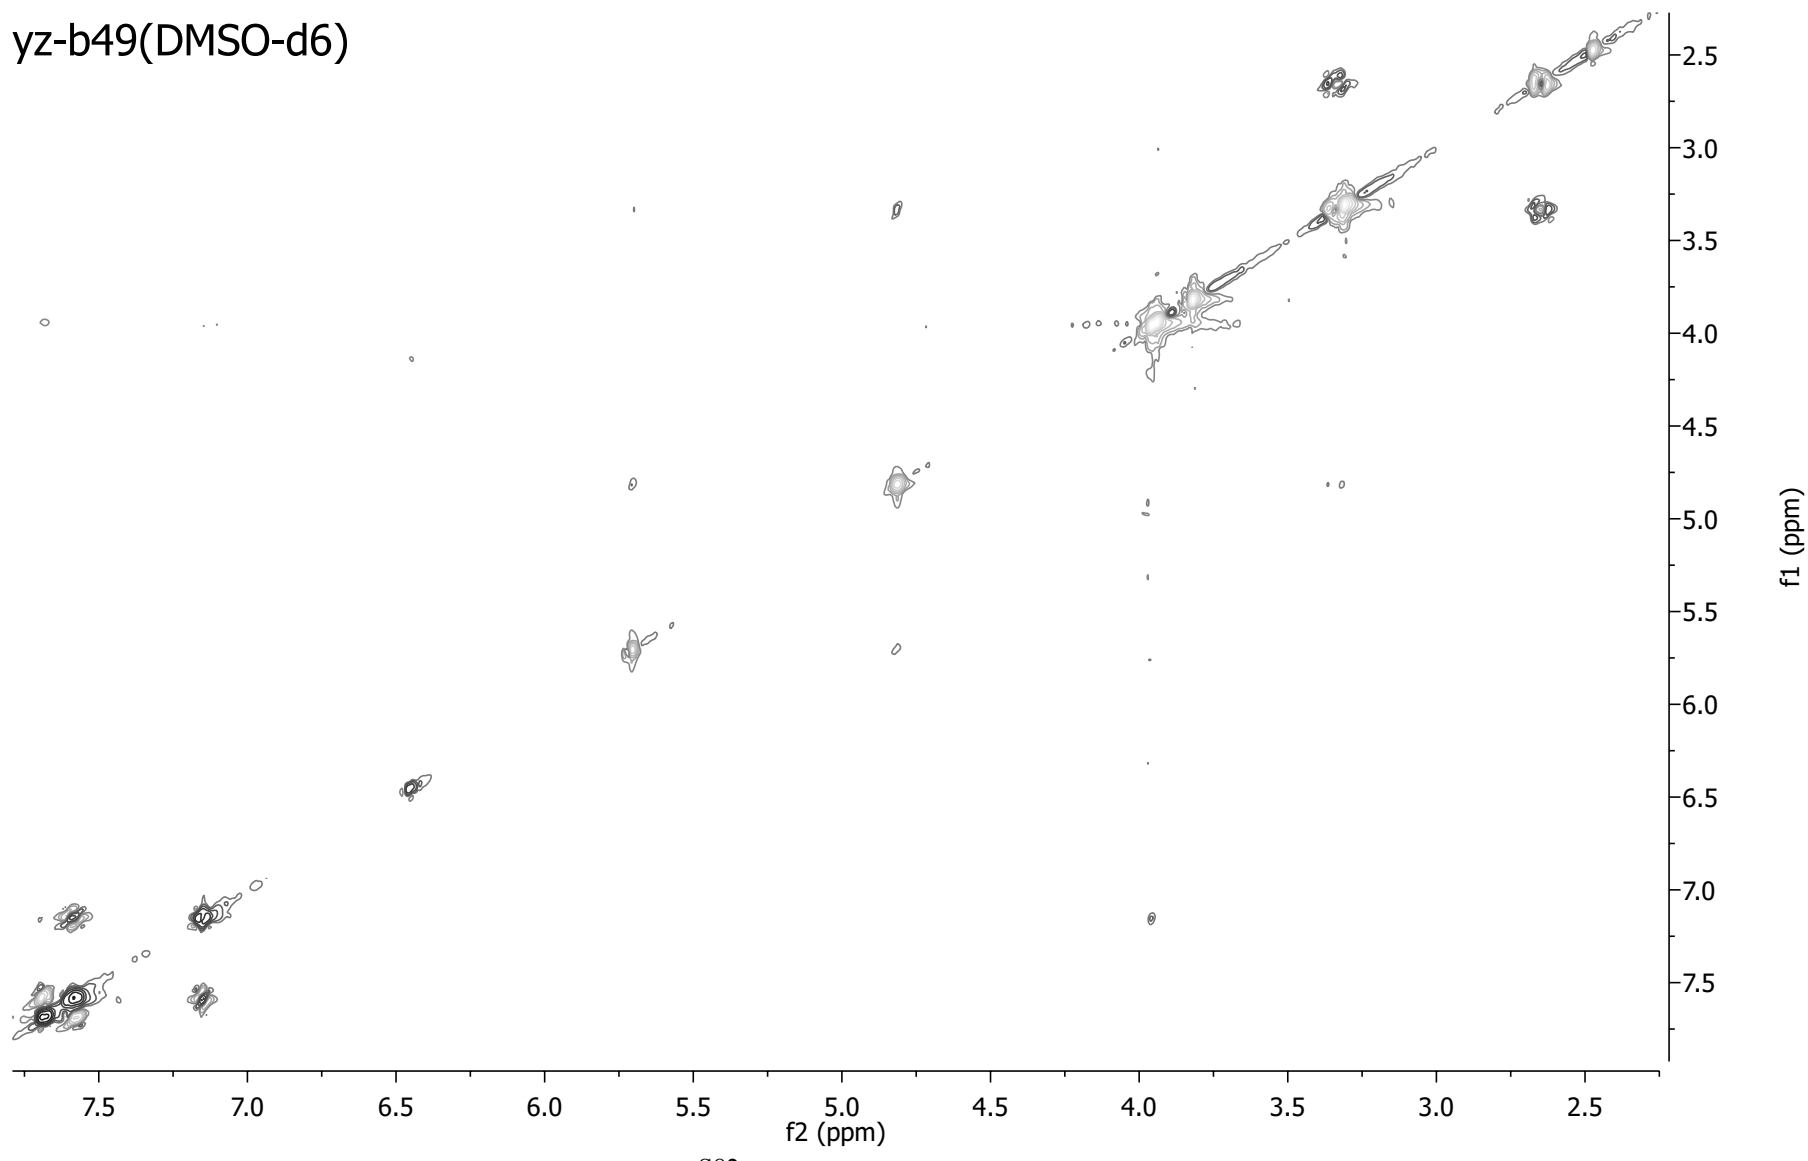

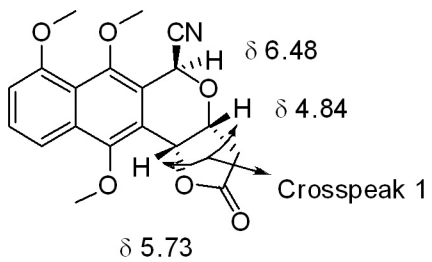

Scheme 3, compound 12

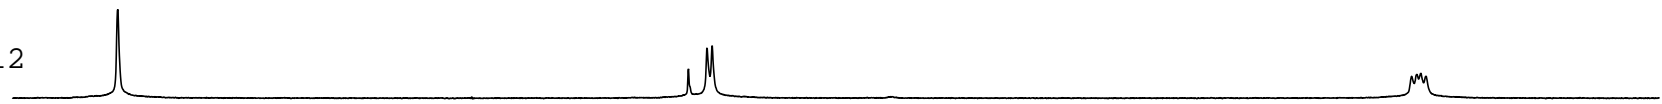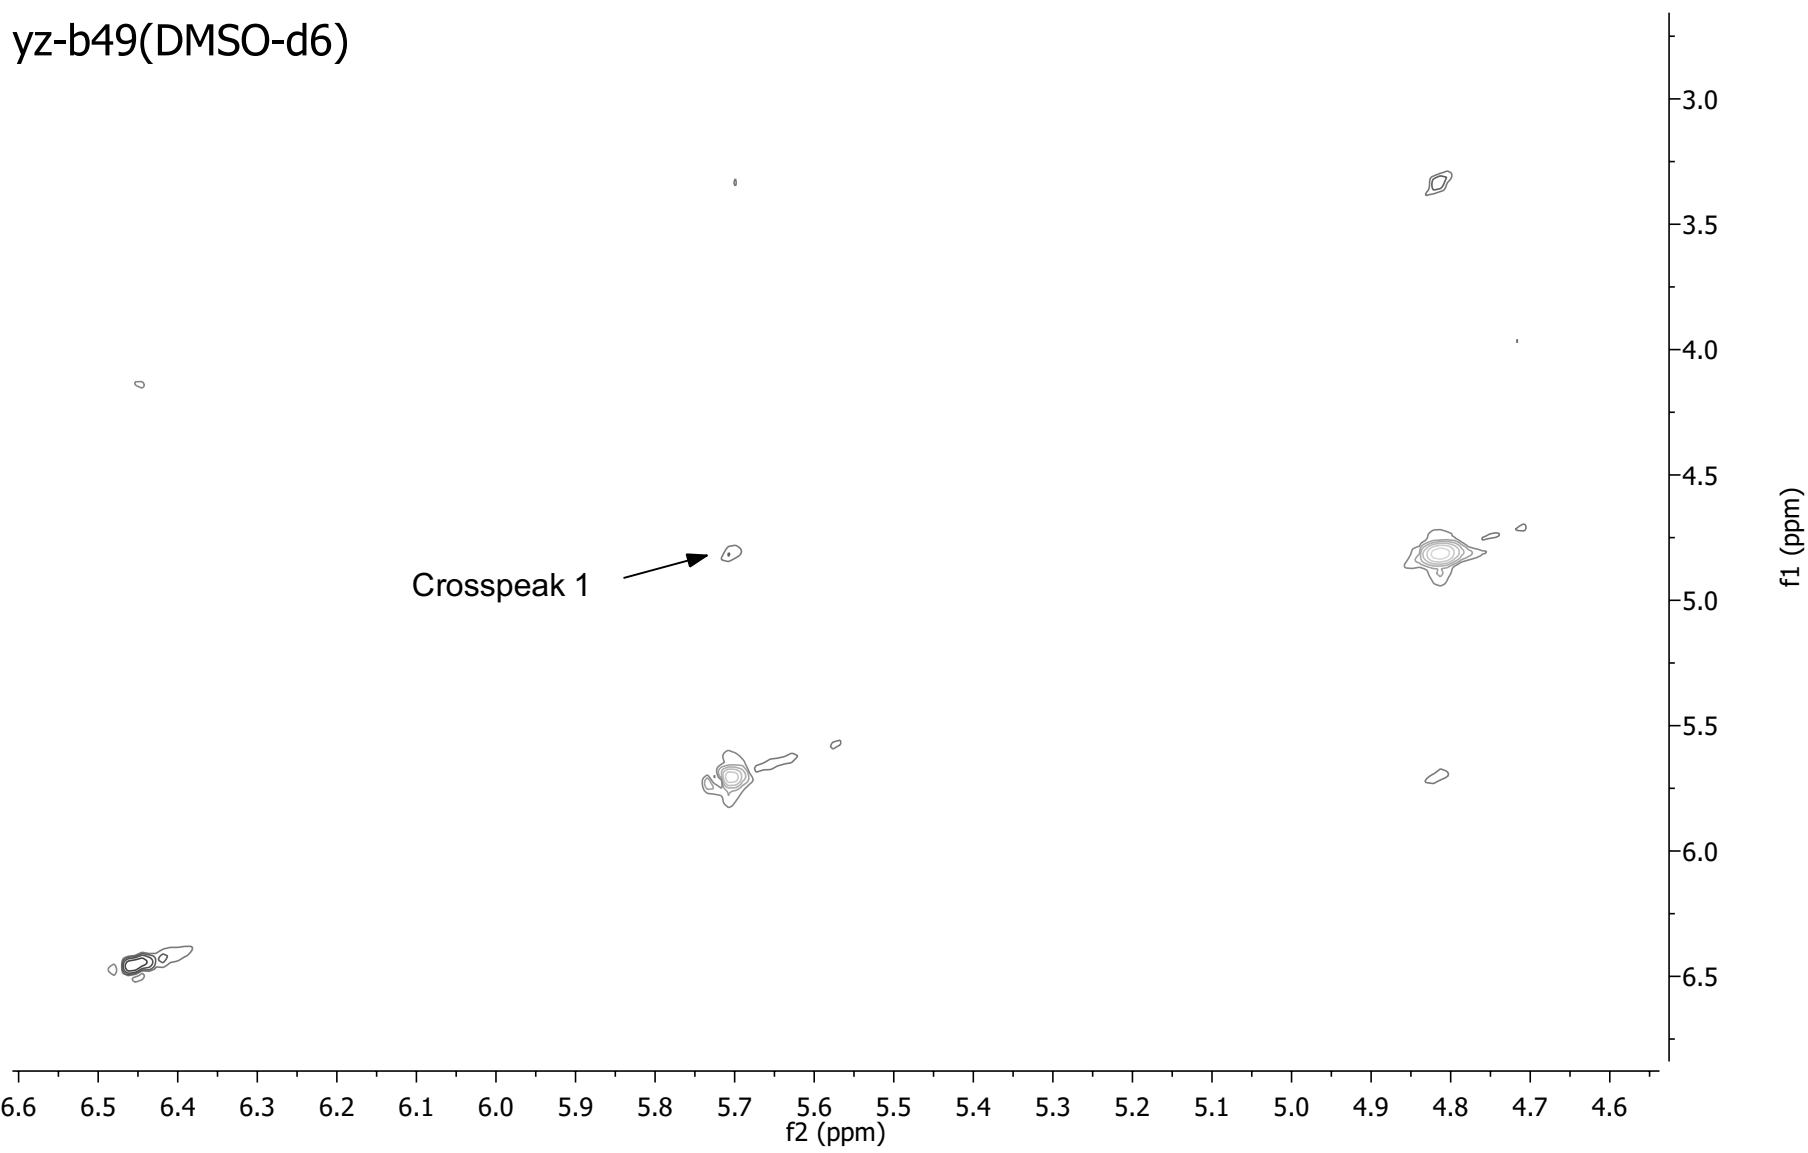

yz-b41

8.112  
8.109  
8.091  
8.087  
7.725  
7.723  
7.529  
7.510  
7.464  
7.443  
7.260  
6.978  
6.958

5.846  
5.839  
5.819  
5.812  
5.615  
5.608

4.864  
4.857  
4.852  
4.845

4.064  
4.051  
3.938  
3.806  
3.799  
3.794  
3.769  
3.761  
3.733

3.288  
3.260  
3.250  
2.973  
2.960  
2.928  
2.916  
2.690  
2.646

— 2.034

1.264  
1.246  
1.228

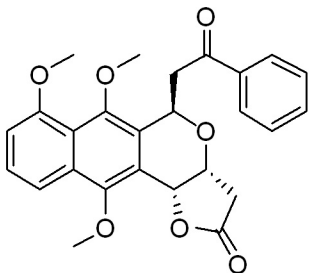

Scheme 3, compound 13

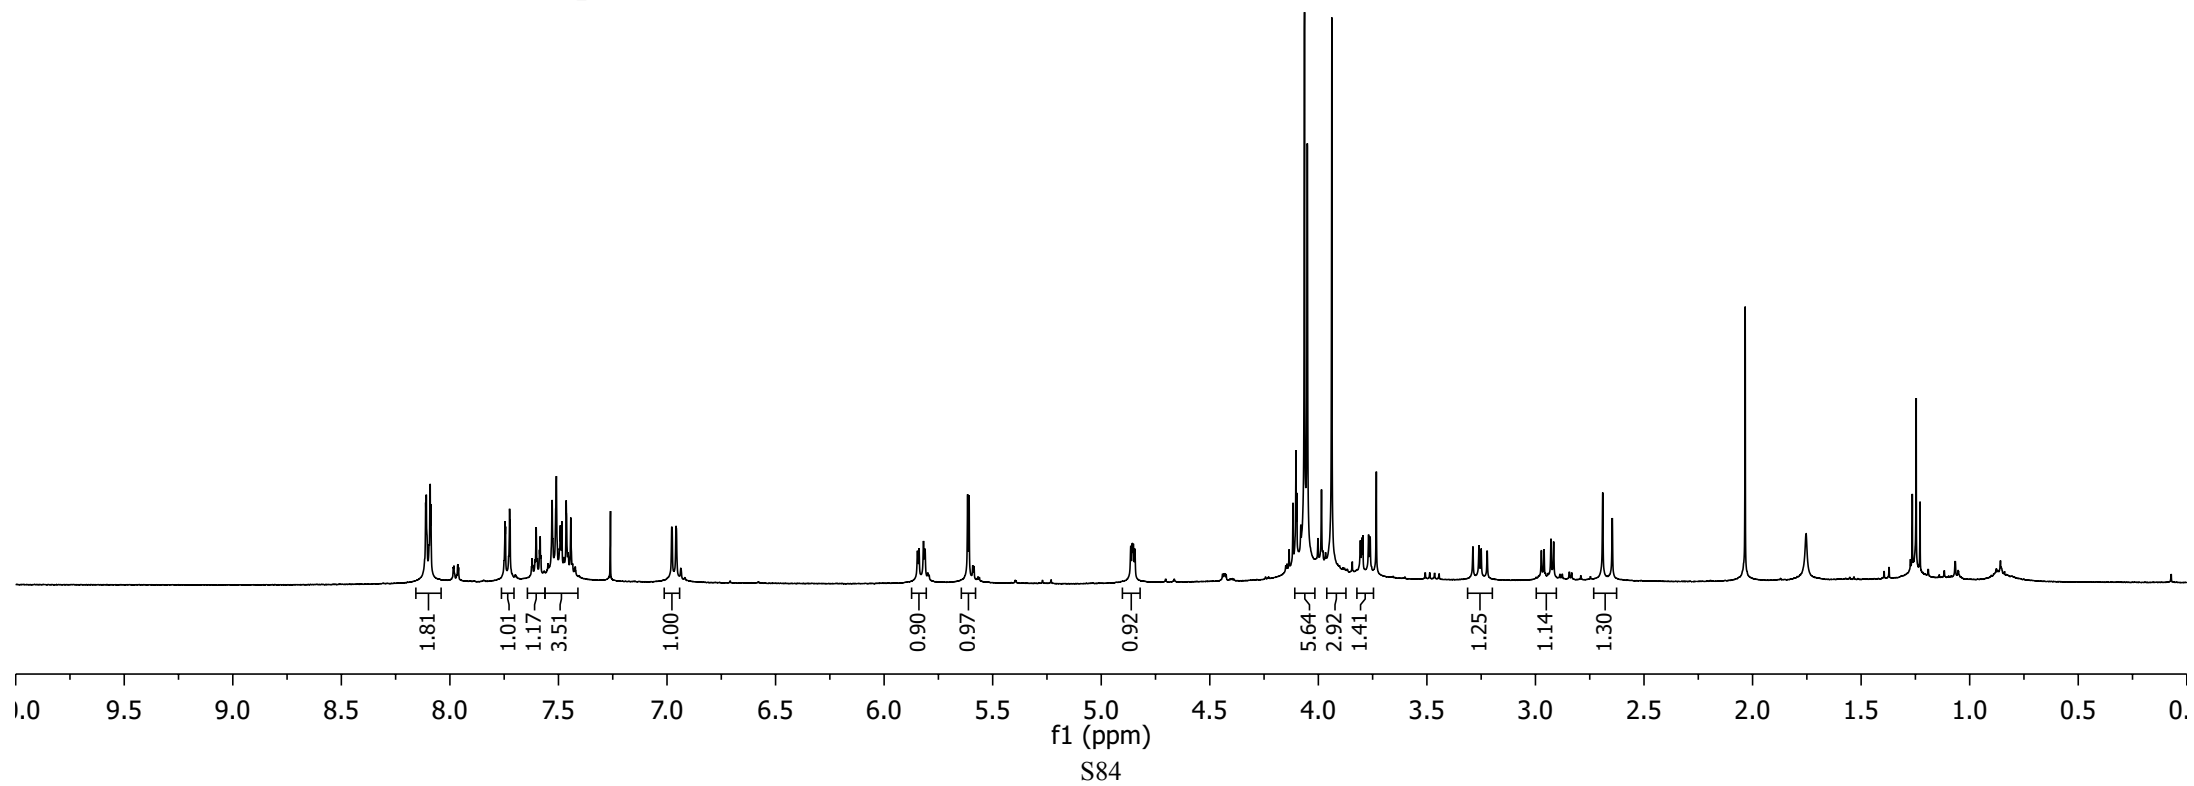

yz-b41

—197.571

—175.122

—155.953

—153.300

—147.590

—136.103

—133.413

—130.407

—128.699

—128.444

—126.691

—126.240

—121.438

—118.350

—115.229

—107.123

—77.360

—77.042

—76.724

—71.562

—68.869

—66.676

—64.069

—62.451

—56.103

—42.717

—37.620

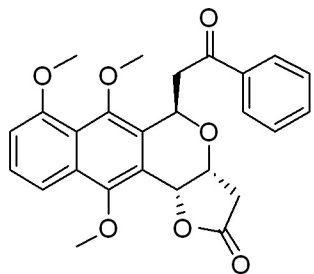

Scheme 3, compound 13

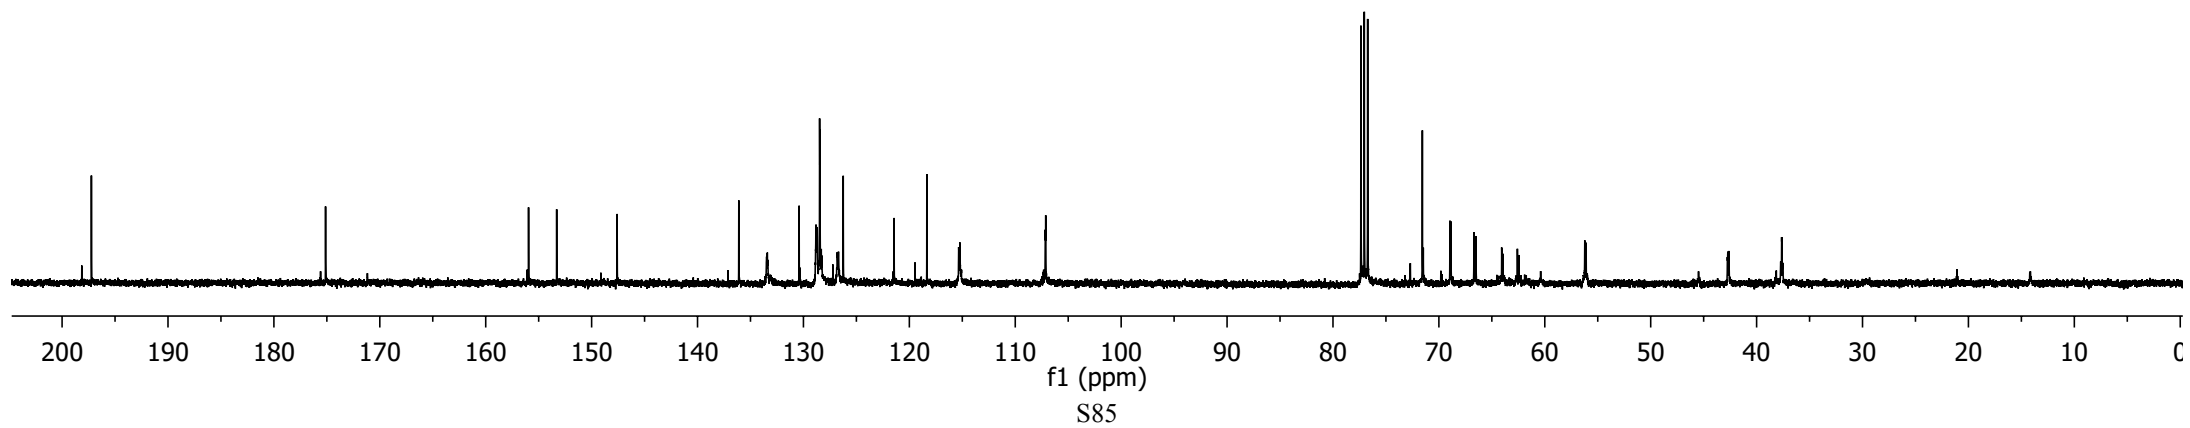



Scheme 3, compound 13

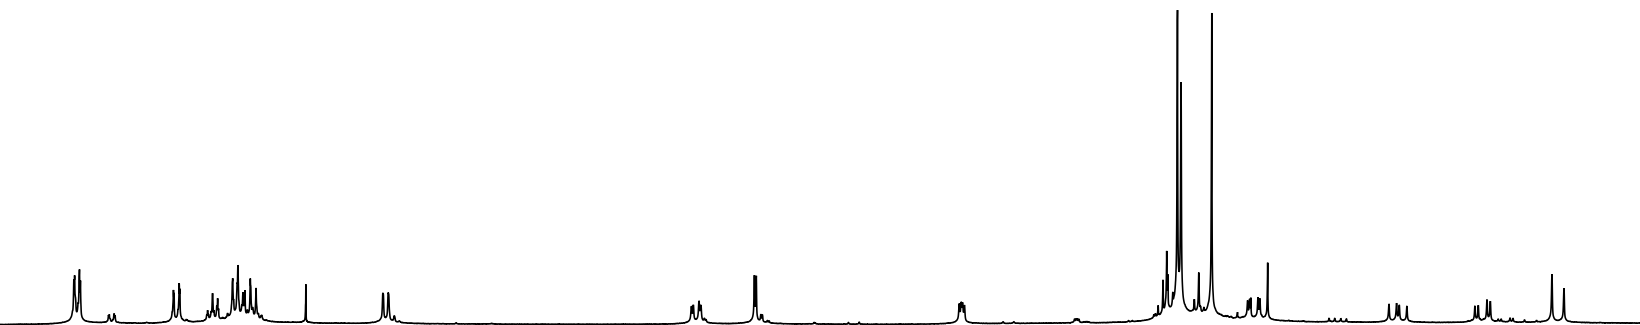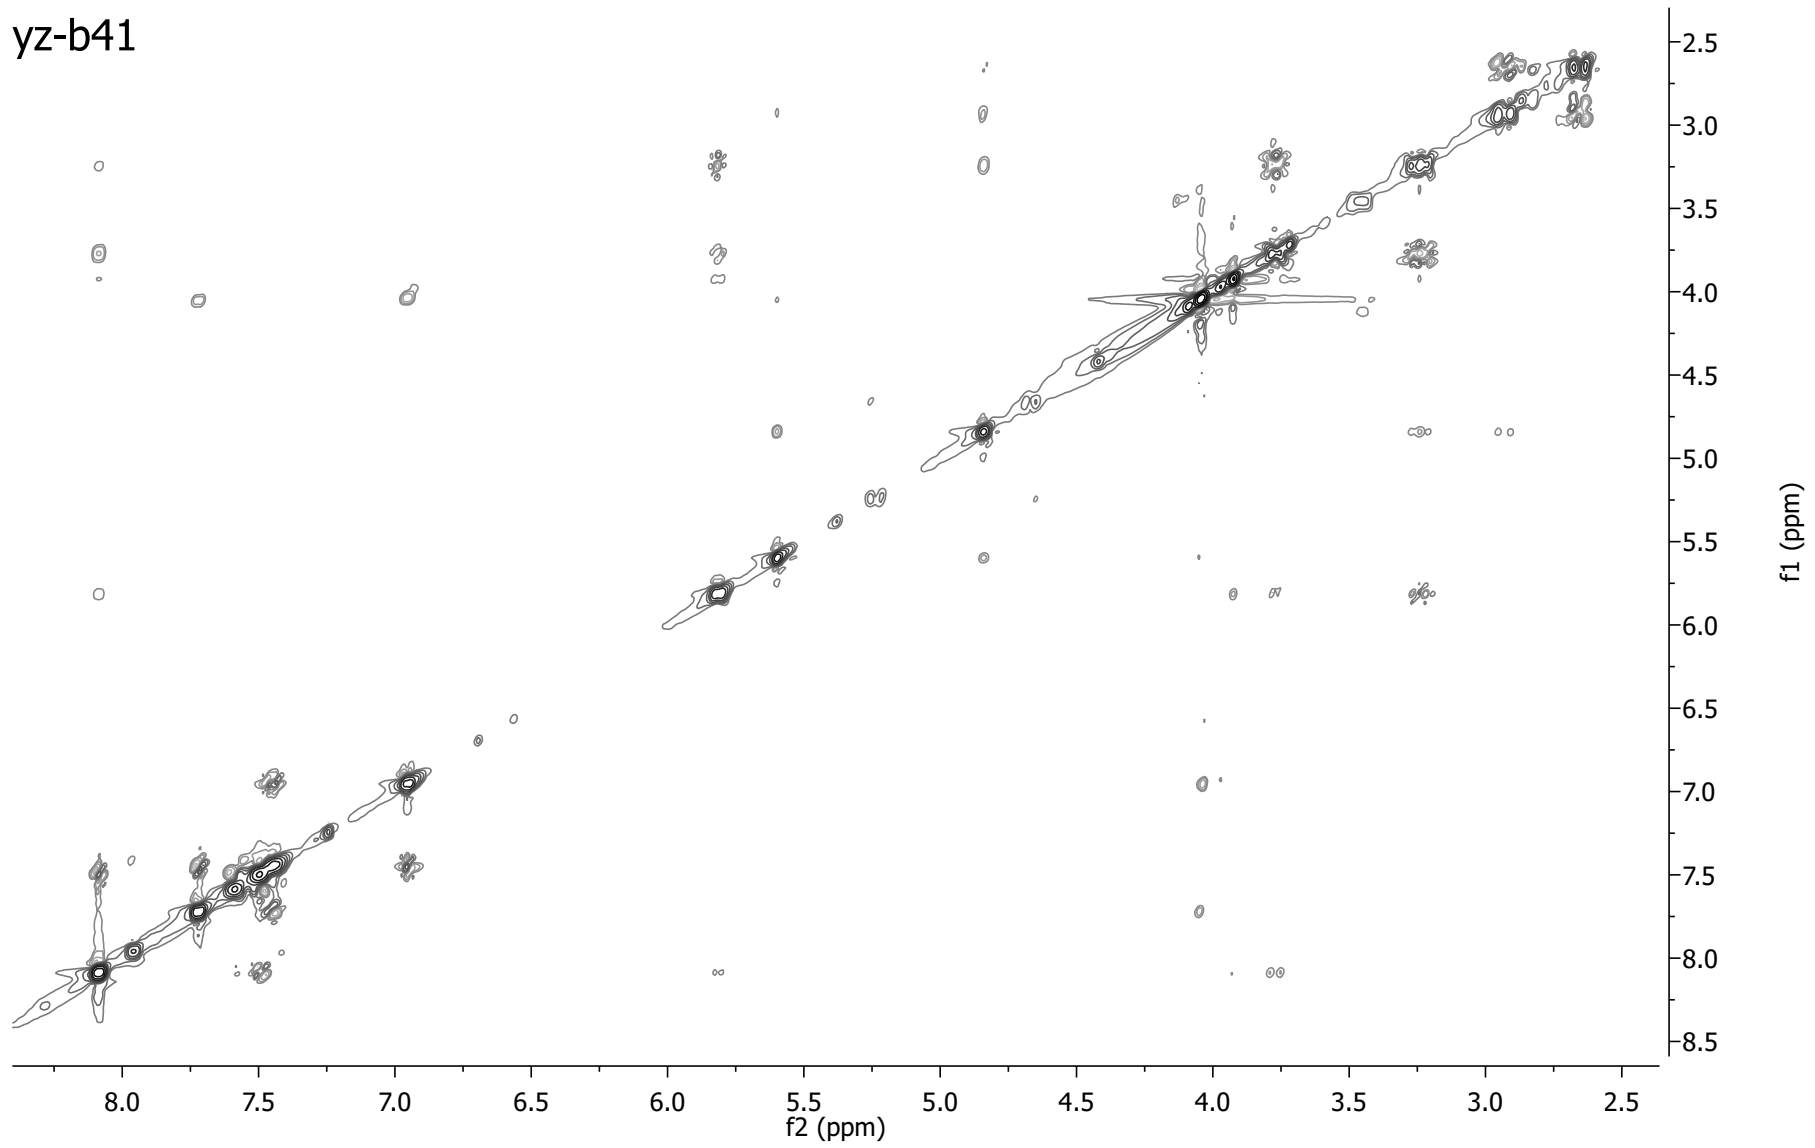

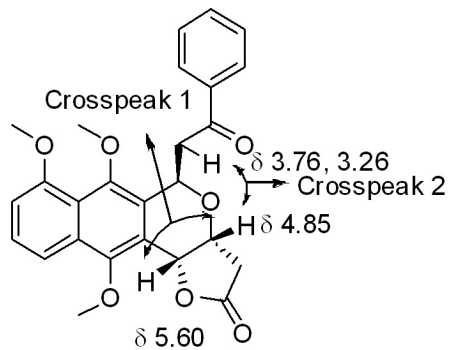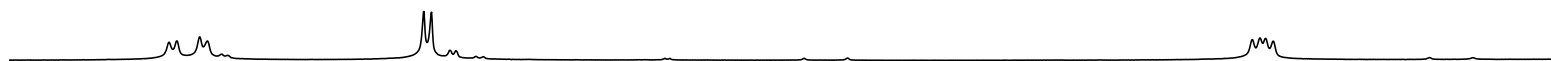

Scheme 3, compound 13yz-b41

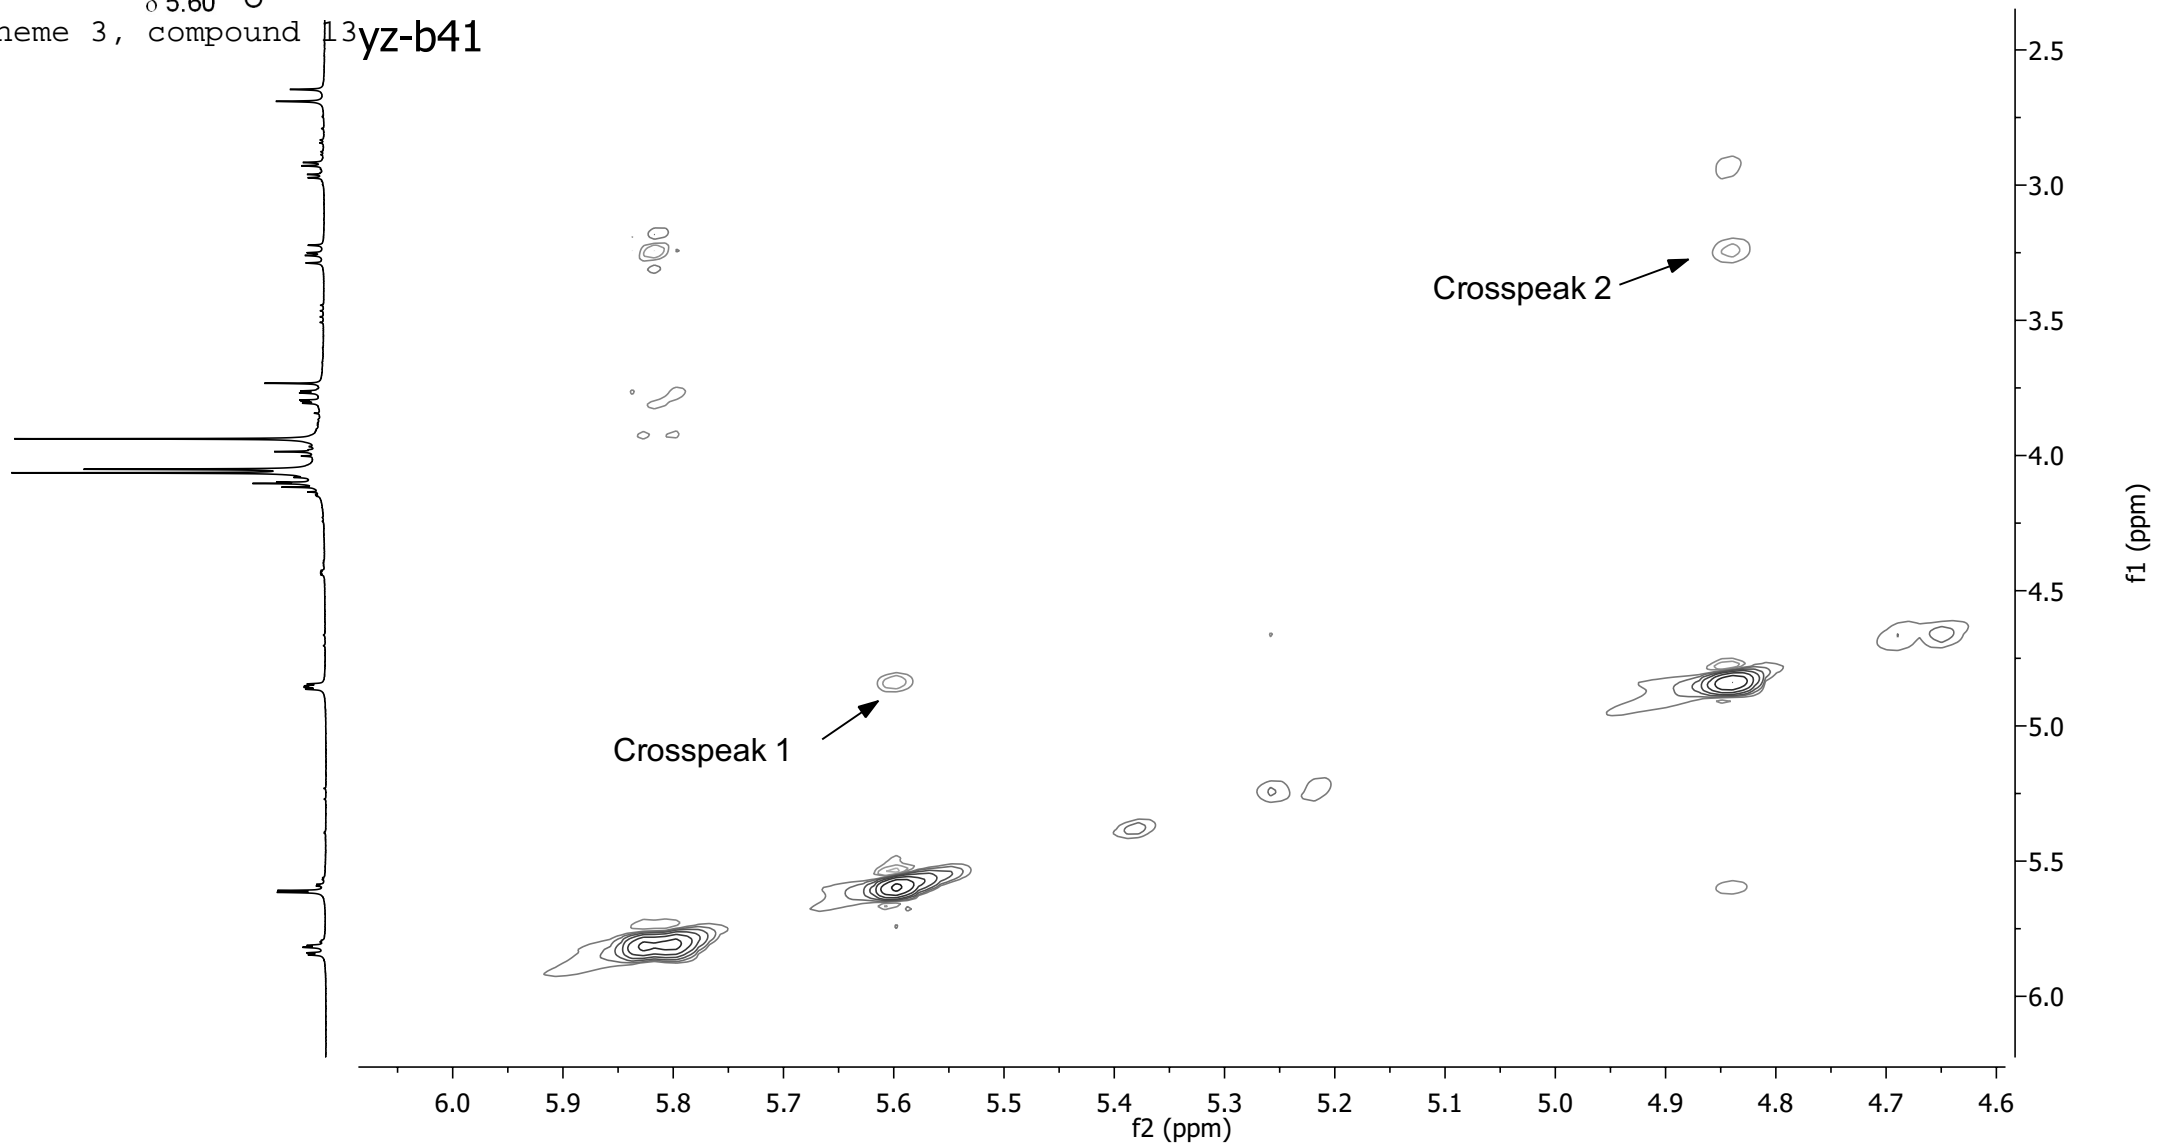

yz-a144

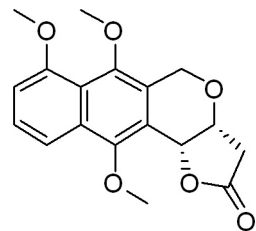

Scheme 3, compound 14

7.730  
7.727  
7.708  
7.706  
7.454  
7.434  
7.413  
7.260  
6.942  
6.925

5.575  
5.568  
5.278  
5.238

4.711  
4.672  
4.413  
4.407  
4.403  
4.073  
4.011  
3.802

3.001  
2.989  
2.957  
2.945  
2.801  
2.757

2.041

1.644

1.254

0.861  
0.858

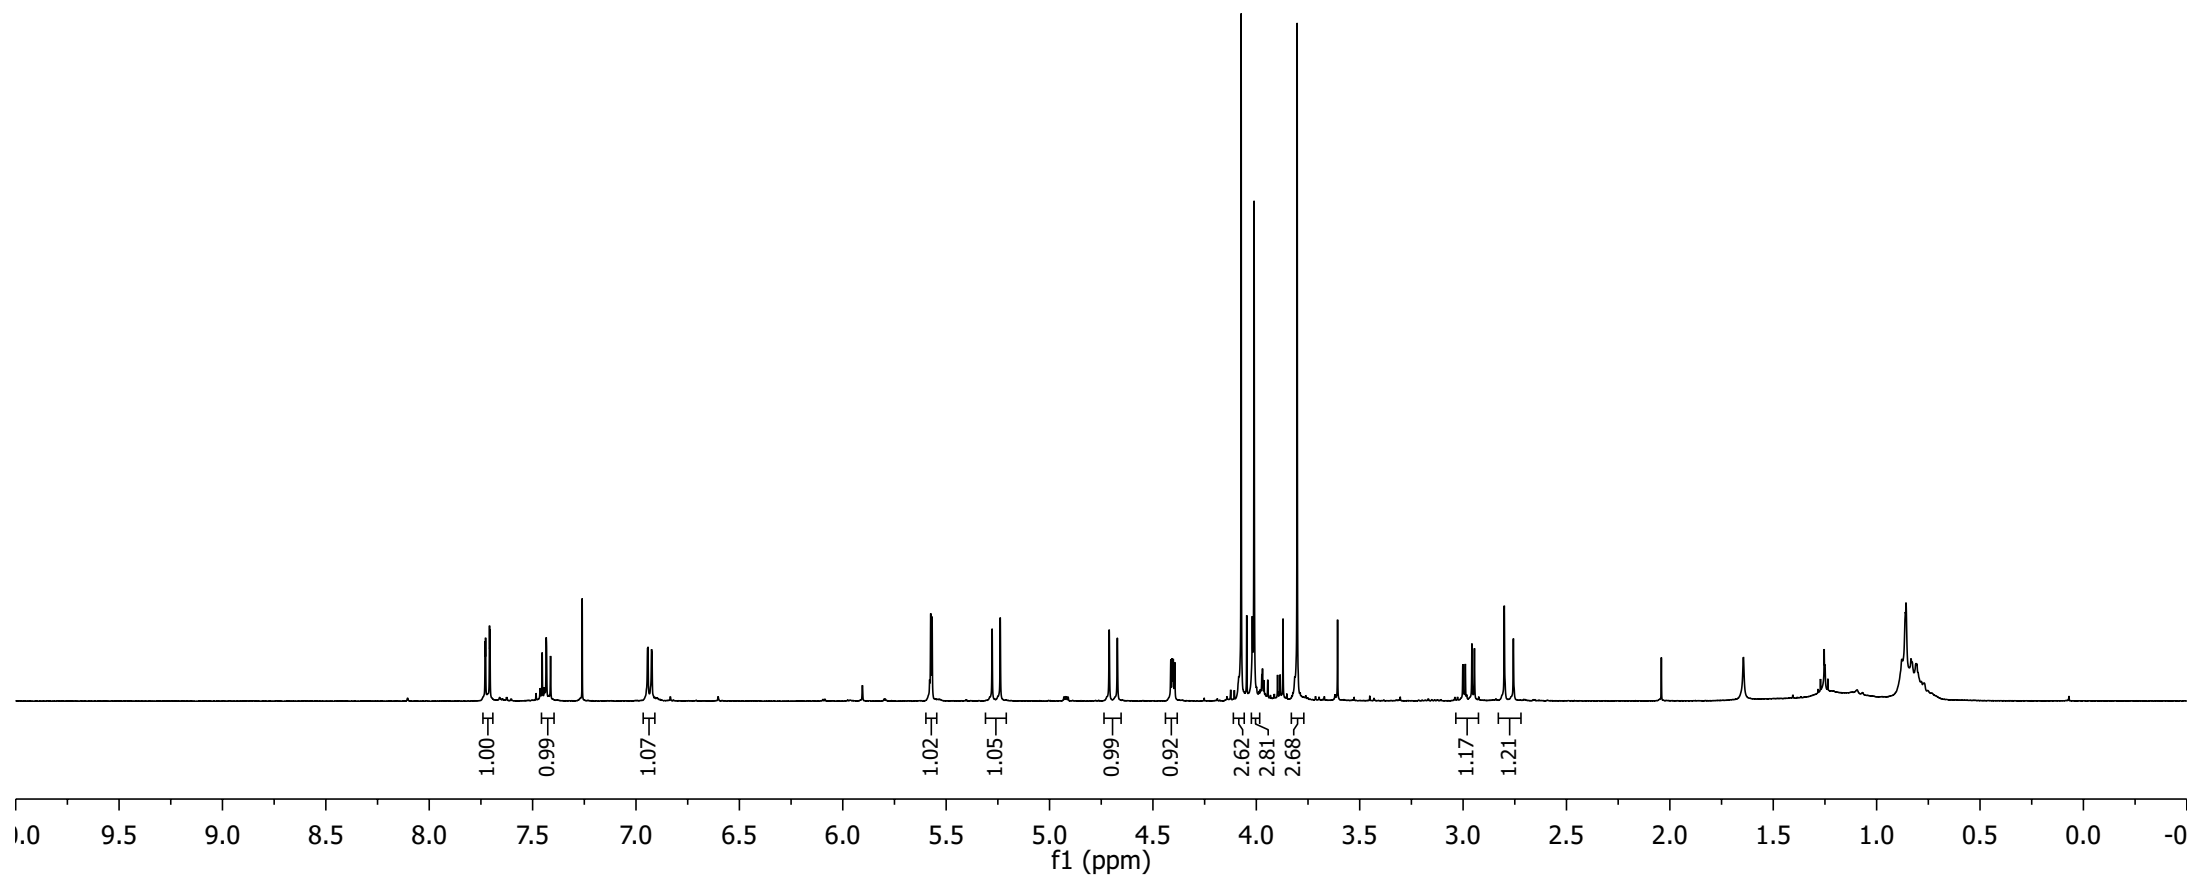



yz-a144

—175.224

—156.214

—153.322

—147.829

—130.250

—126.521

—124.428

—121.426

—119.027

—115.331

—107.212

—77.478

—77.160

—76.842

—73.347

—72.498

—72.480

—64.261

—63.404

—62.103

—56.227

—37.823

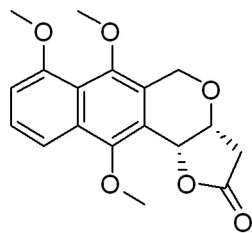

Scheme 3, compound 14

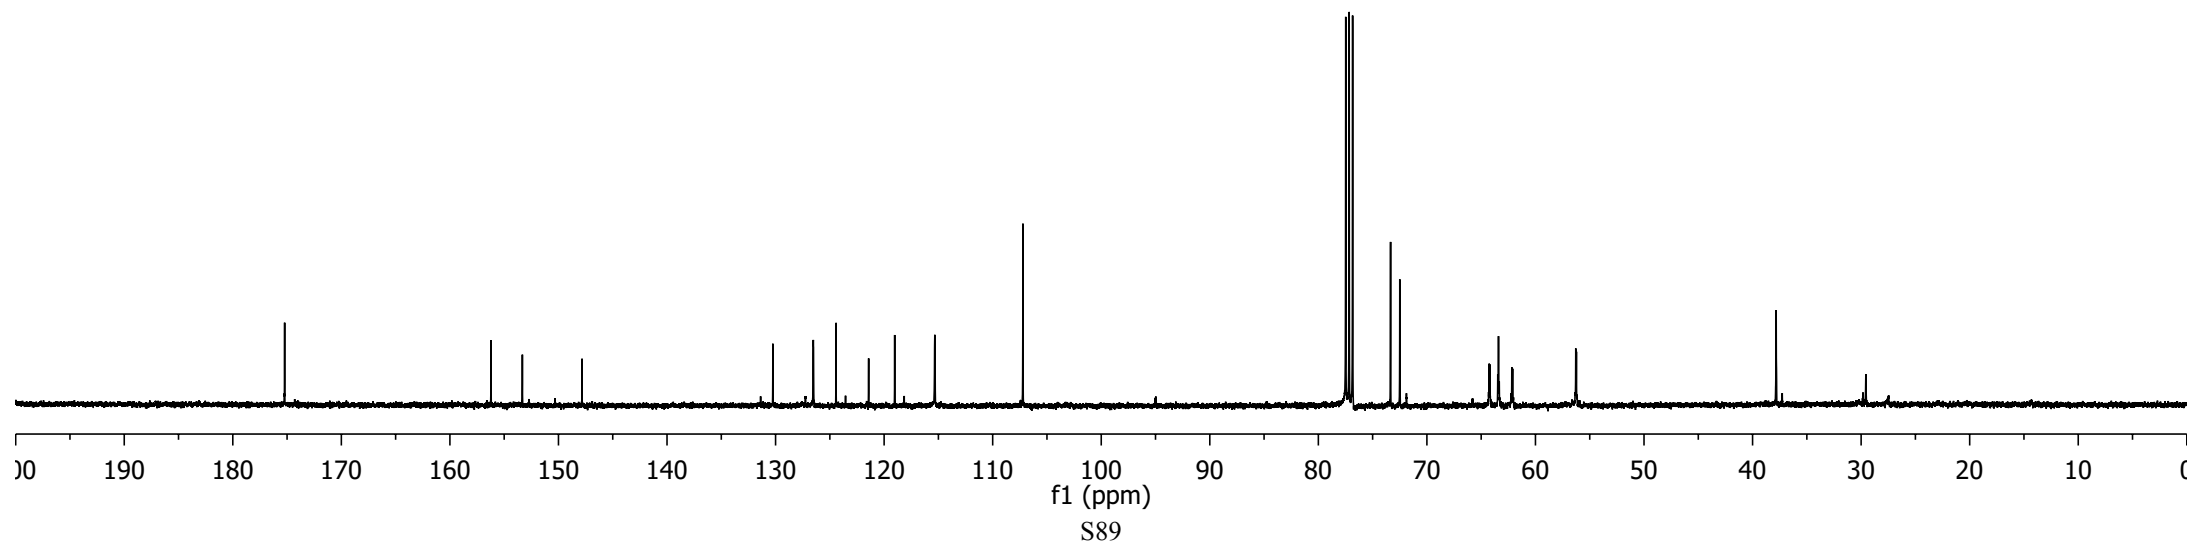

yzza99

7.706  
7.692  
7.687  
7.667  
7.314  
7.309  
7.294  
7.290  
7.260

5.279  
5.274  
5.269  
4.773  
4.763  
4.758  
4.338  
4.329  
4.324  
4.318

2.920  
2.909  
2.876  
2.865  
2.768  
2.724  
2.096  
2.041  
1.962  
1.904  
1.475  
1.423  
1.348  
1.274  
0.924  
0.906  
0.887

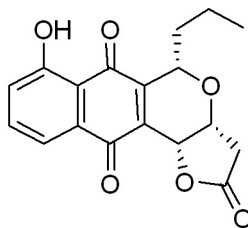

Scheme 4, compound 2

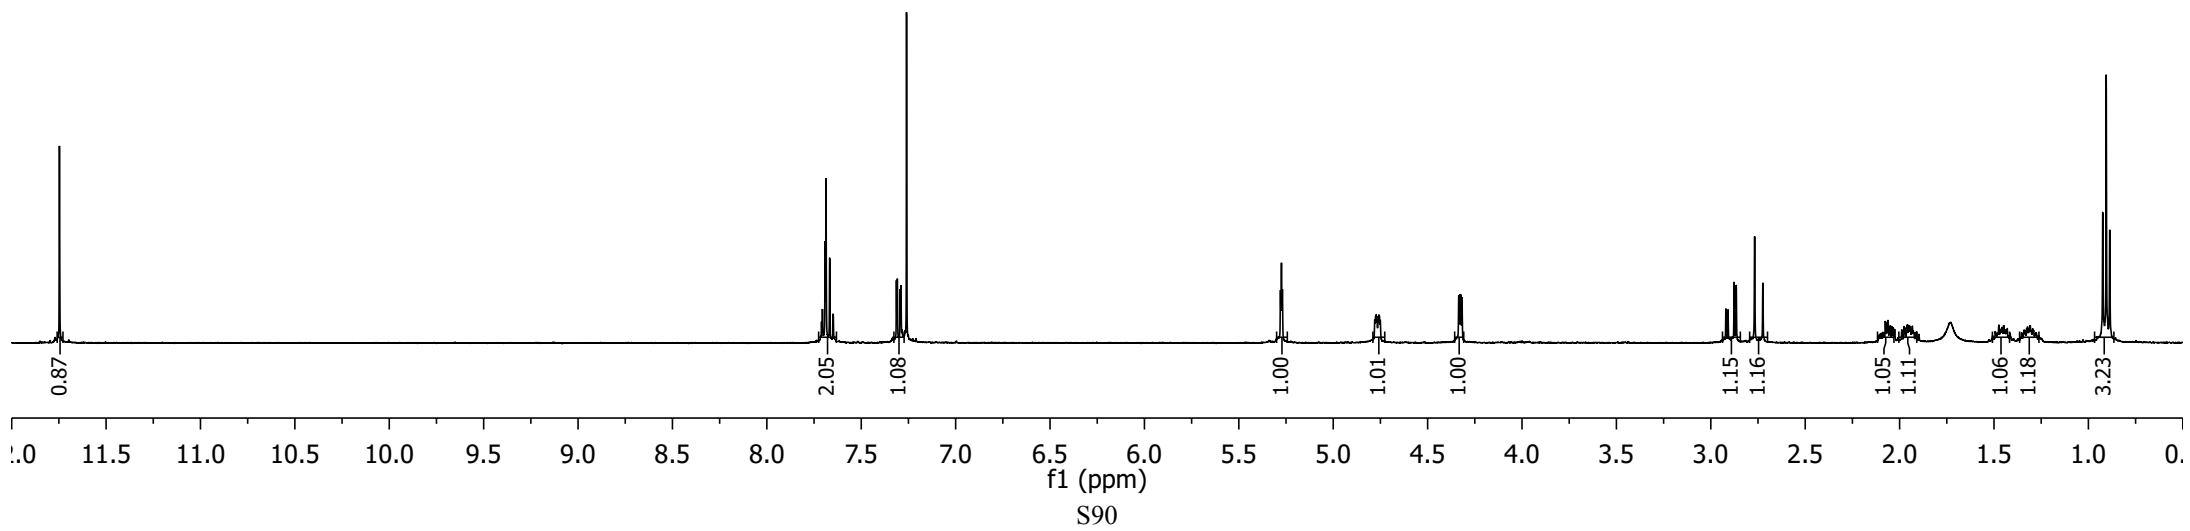

yz-a99

188.613  
181.543  
174.510  
161.873  
149.842  
137.237  
136.335  
131.573  
124.994  
119.799  
115.162

77.478  
77.160  
76.842  
71.985  
70.973  
69.882

37.482  
36.146

18.386  
14.103

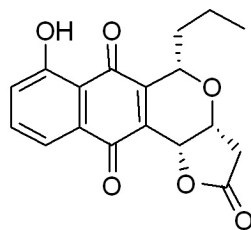

Scheme 4, compound 2

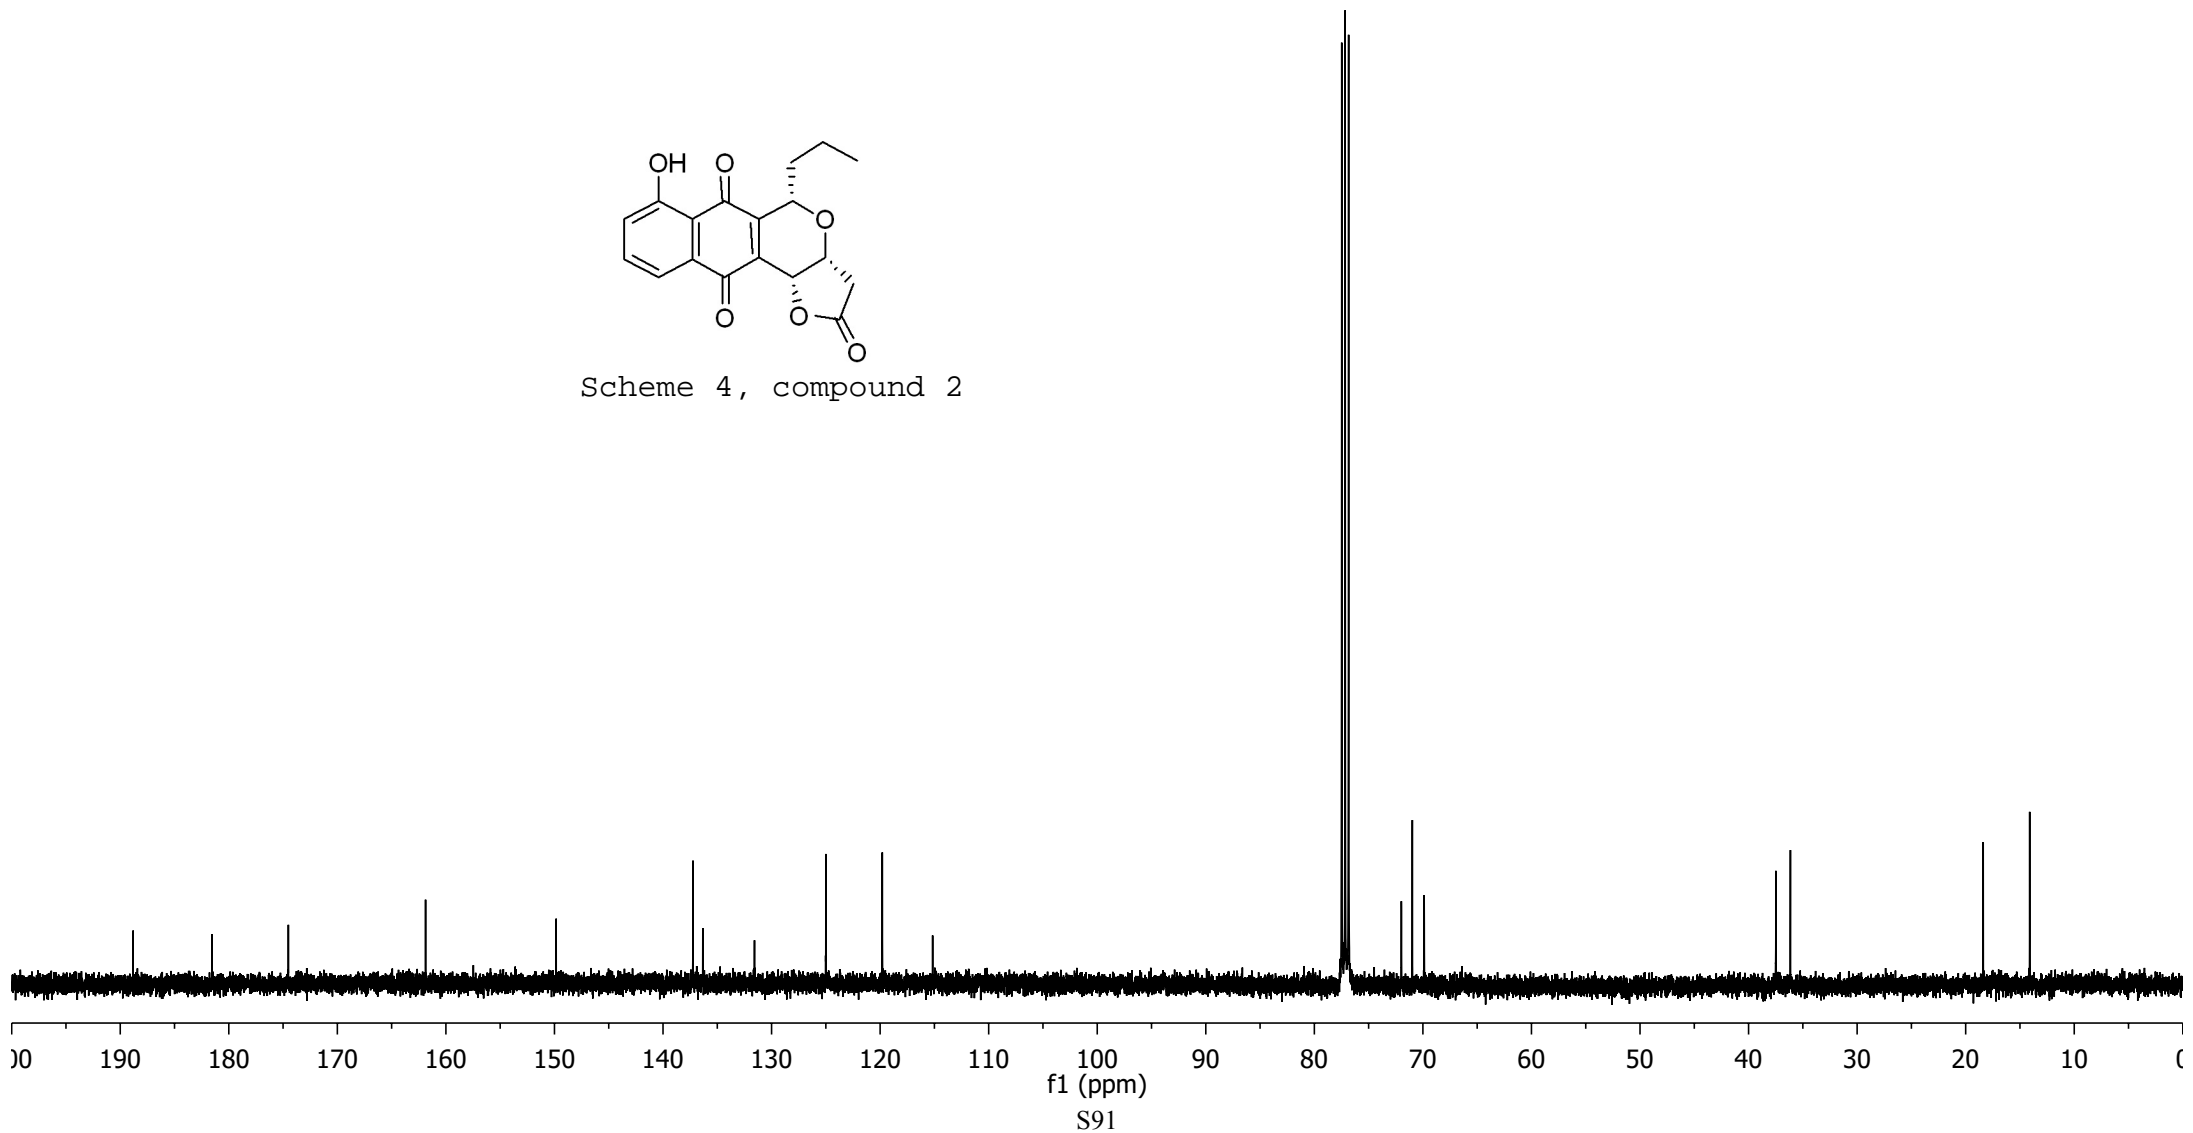

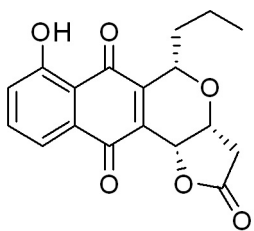

Scheme 4, compound 2

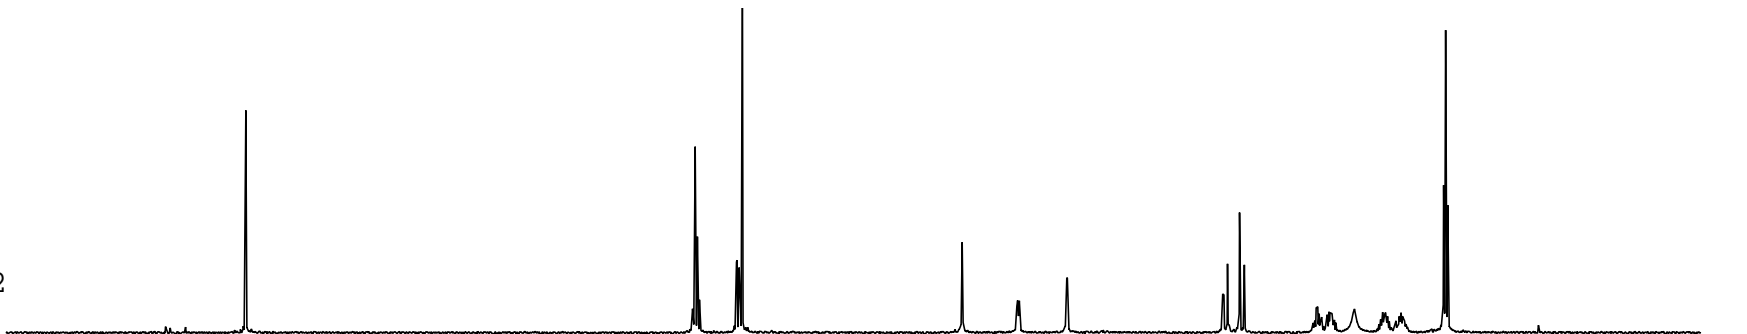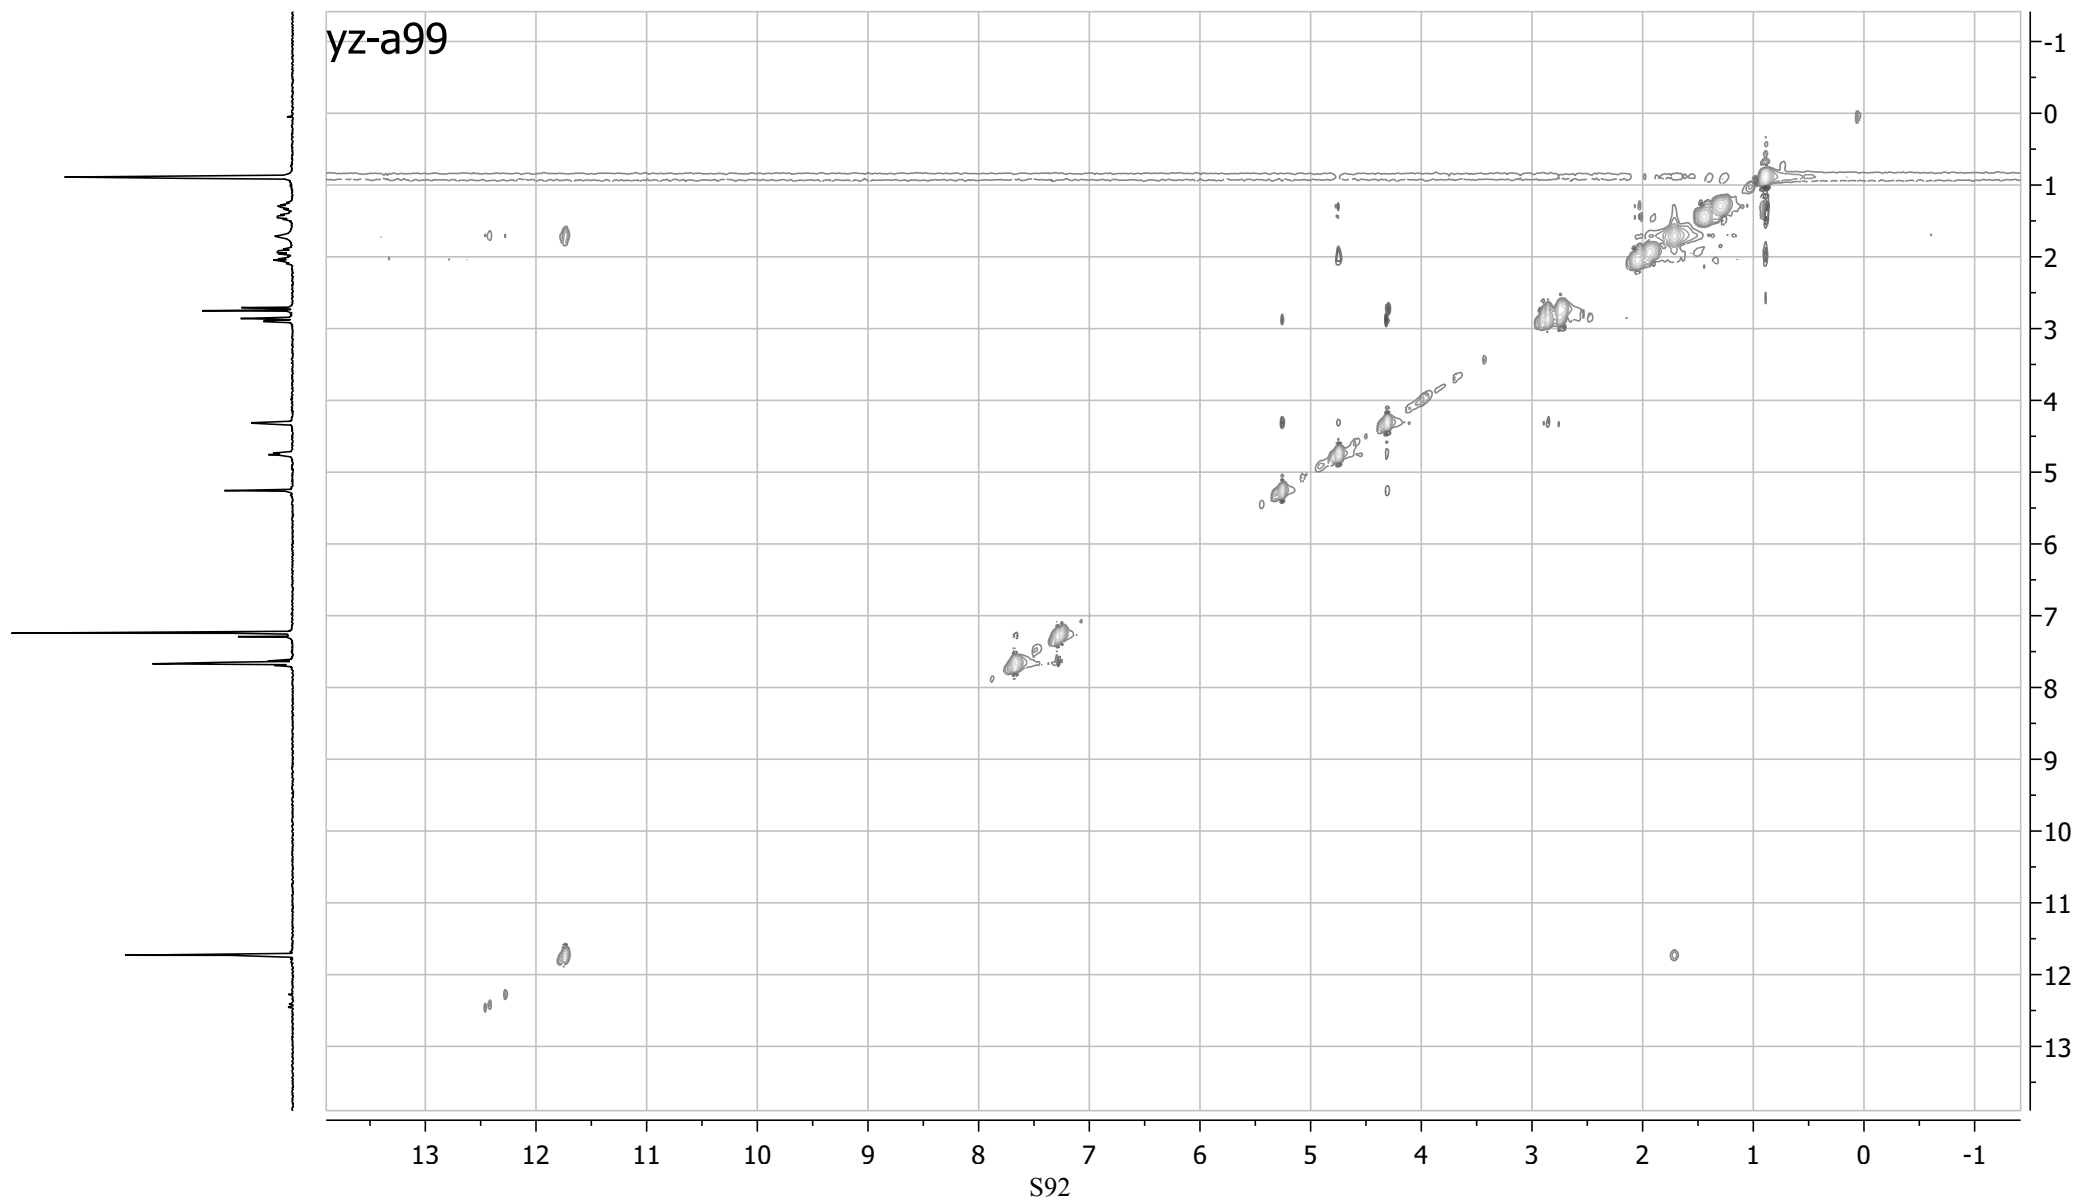

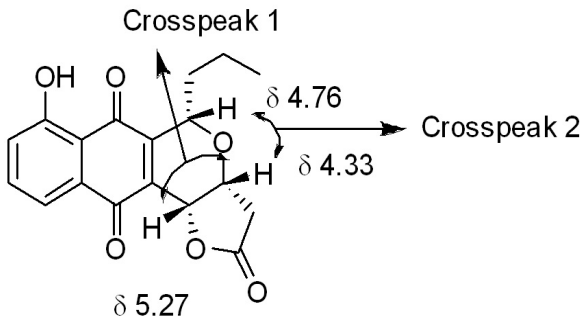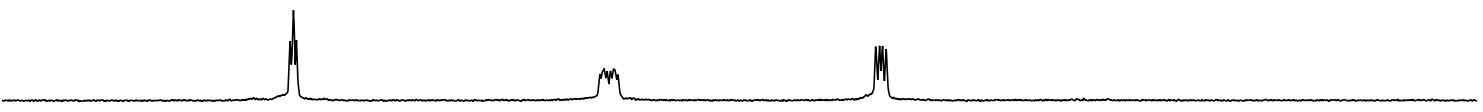

Scheme 4, compound 2

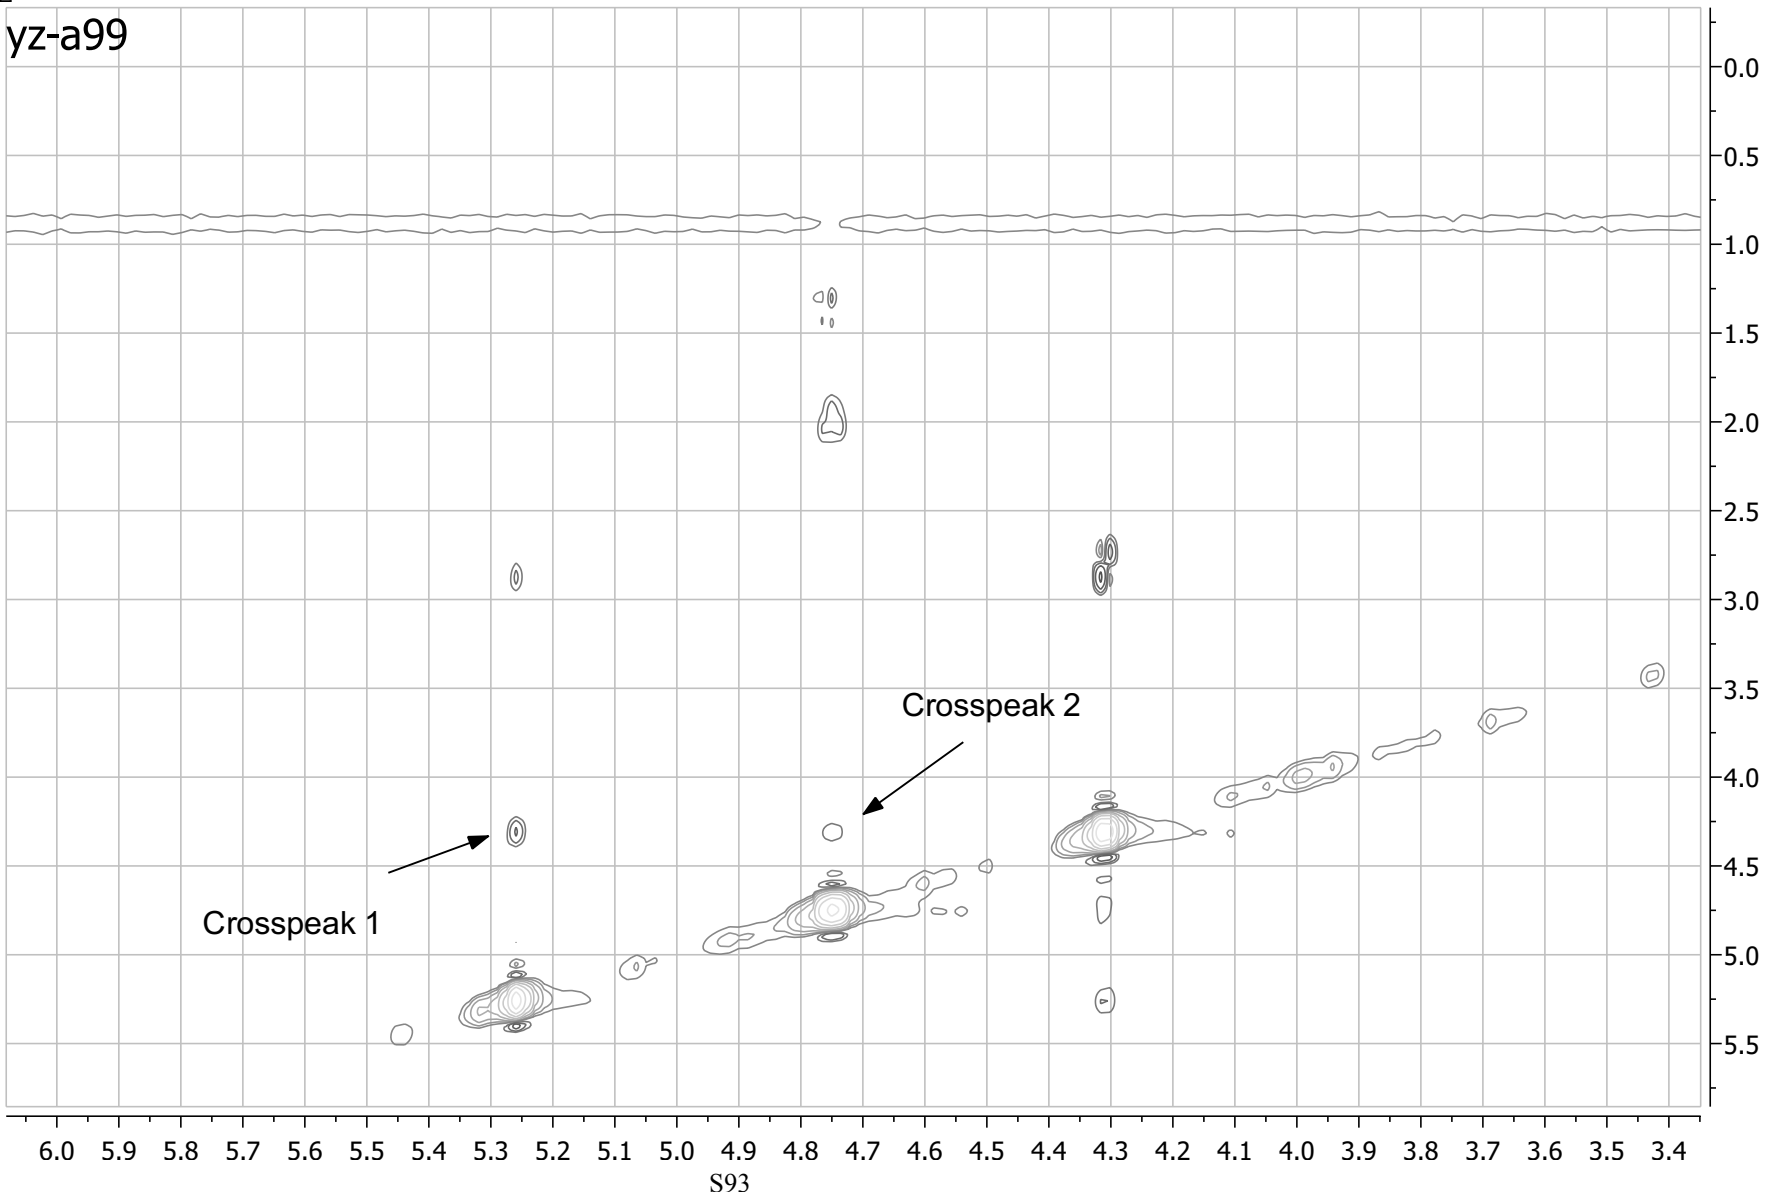

yz-b7

—11.850

7.709  
7.695  
7.691  
7.687  
7.667  
7.311  
7.307  
7.291  
7.287  
7.260

5.261  
5.253  
4.932  
4.924  
4.906  
4.898  
4.628  
4.621  
4.615  
4.608

2.986  
2.972  
2.941  
2.928  
2.732  
2.688

1.778  
1.716  
1.669  
1.587  
1.557  
1.047  
1.029  
1.011

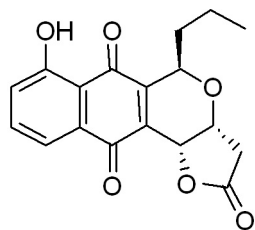

Scheme 4, compound 1

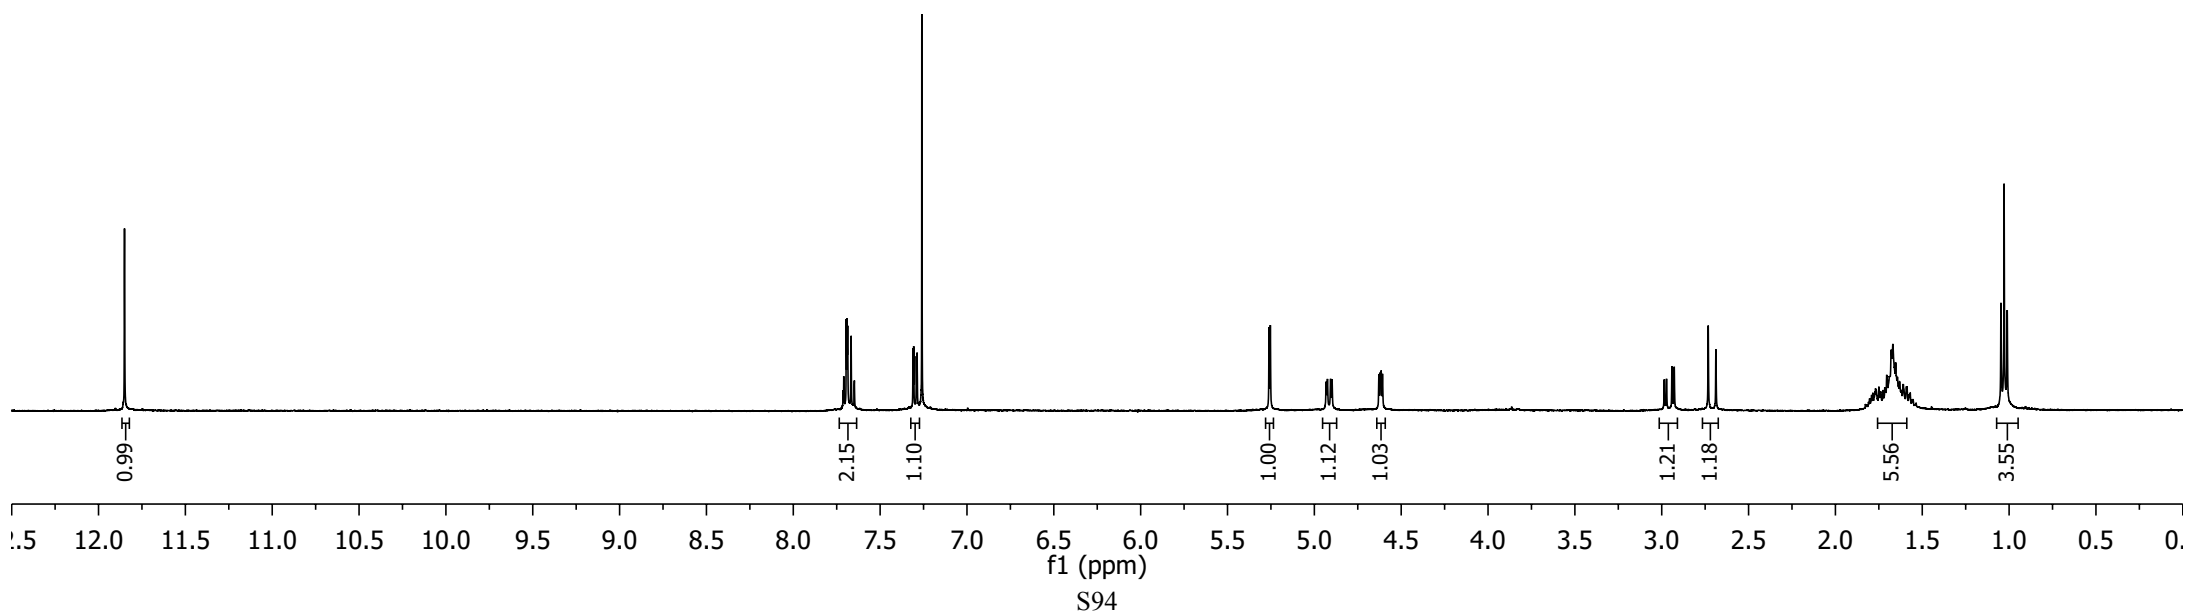

yz-b7

- 188.187
- 174.038
- 162.041
- 149.399
- ~ 137.314
- ~ 135.303
- ~ 131.591
- 124.989
- 119.866
- 114.952
- 77.478
- 77.168
- 76.842
- ~ 69.763
- ~ 68.833
- ~ 66.369
- 36.974
- 33.848
- 19.648
- 13.676

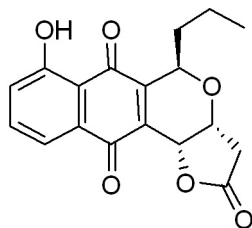

Scheme 4, compound 1

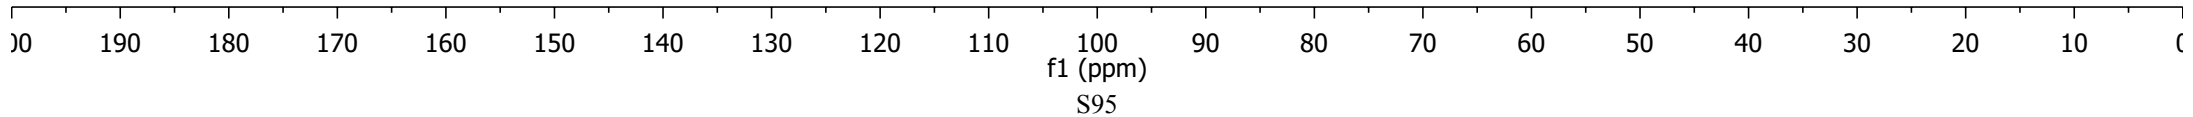

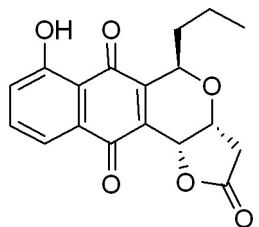

Scheme 4, compound 1

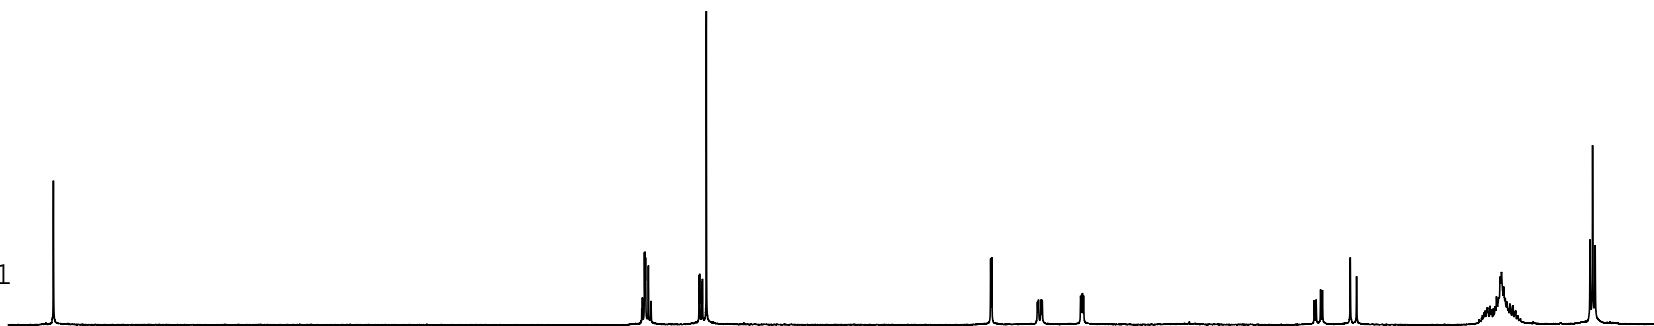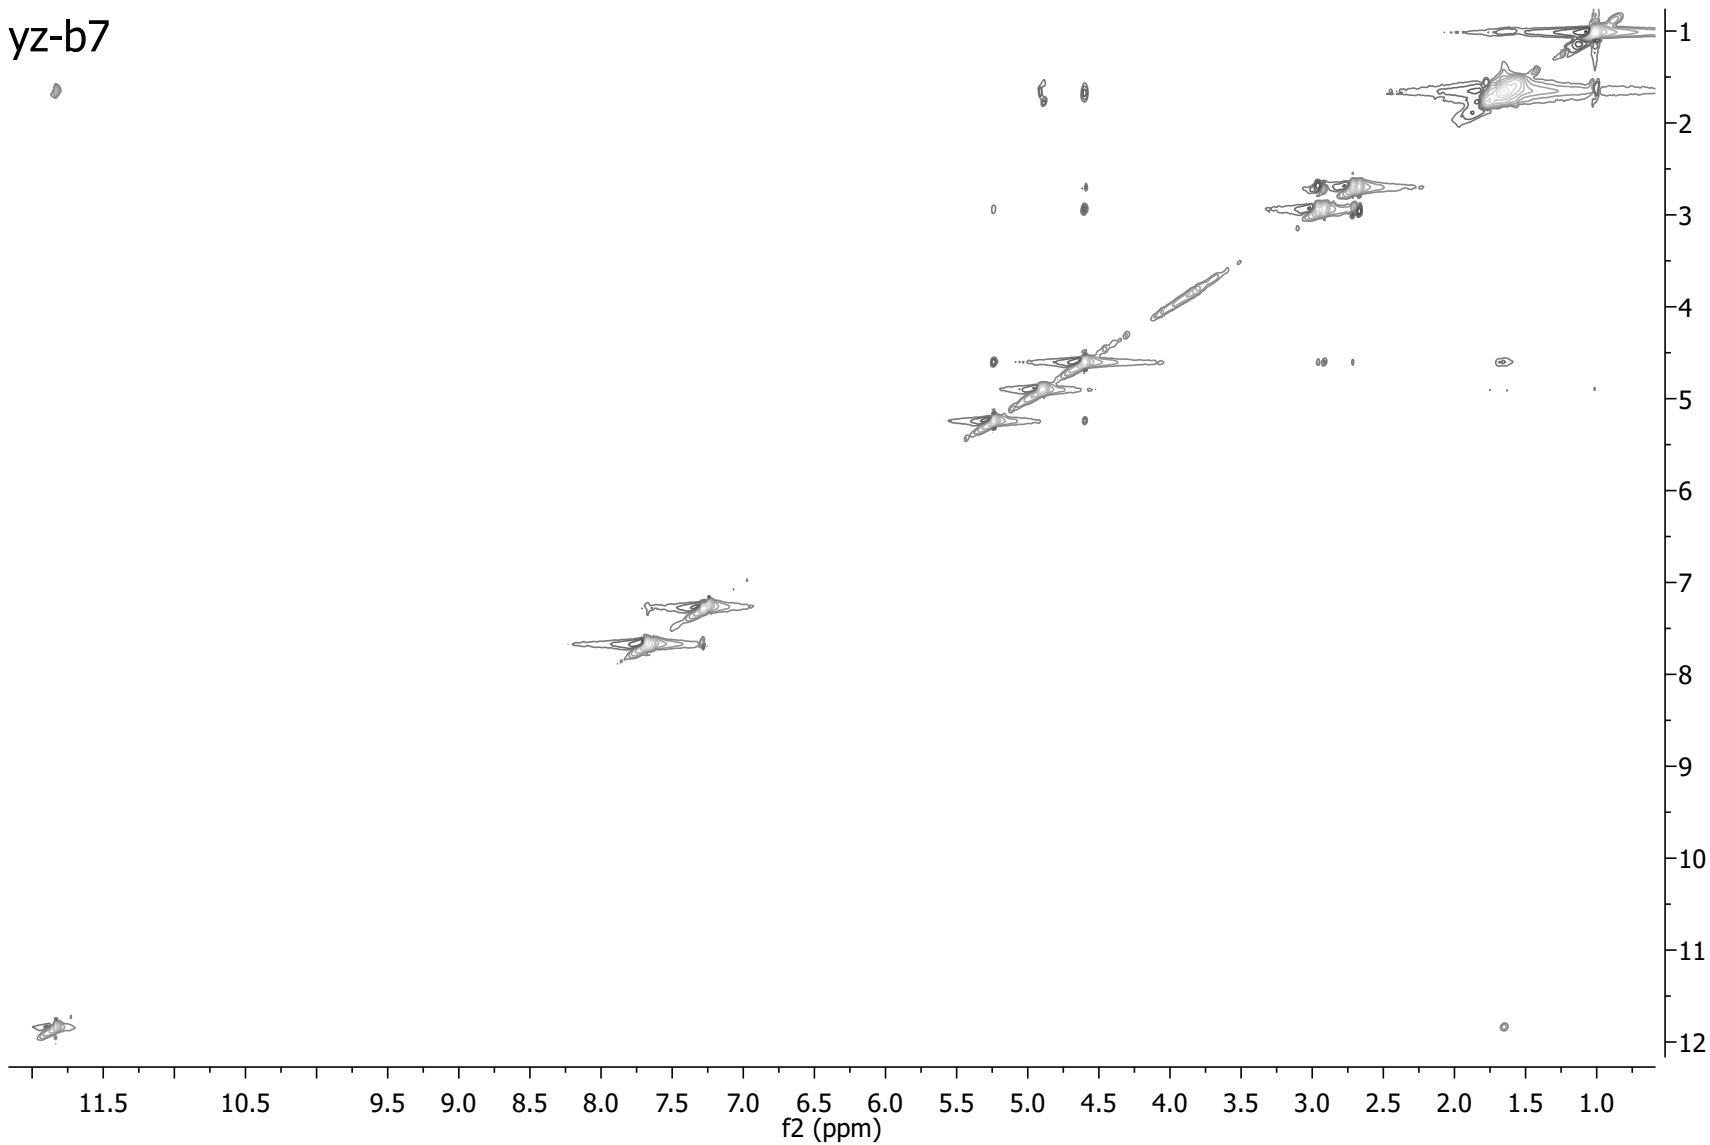



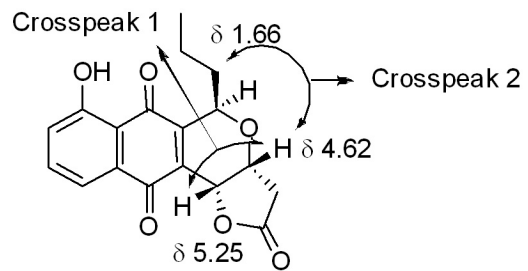

Scheme 4, compound 1

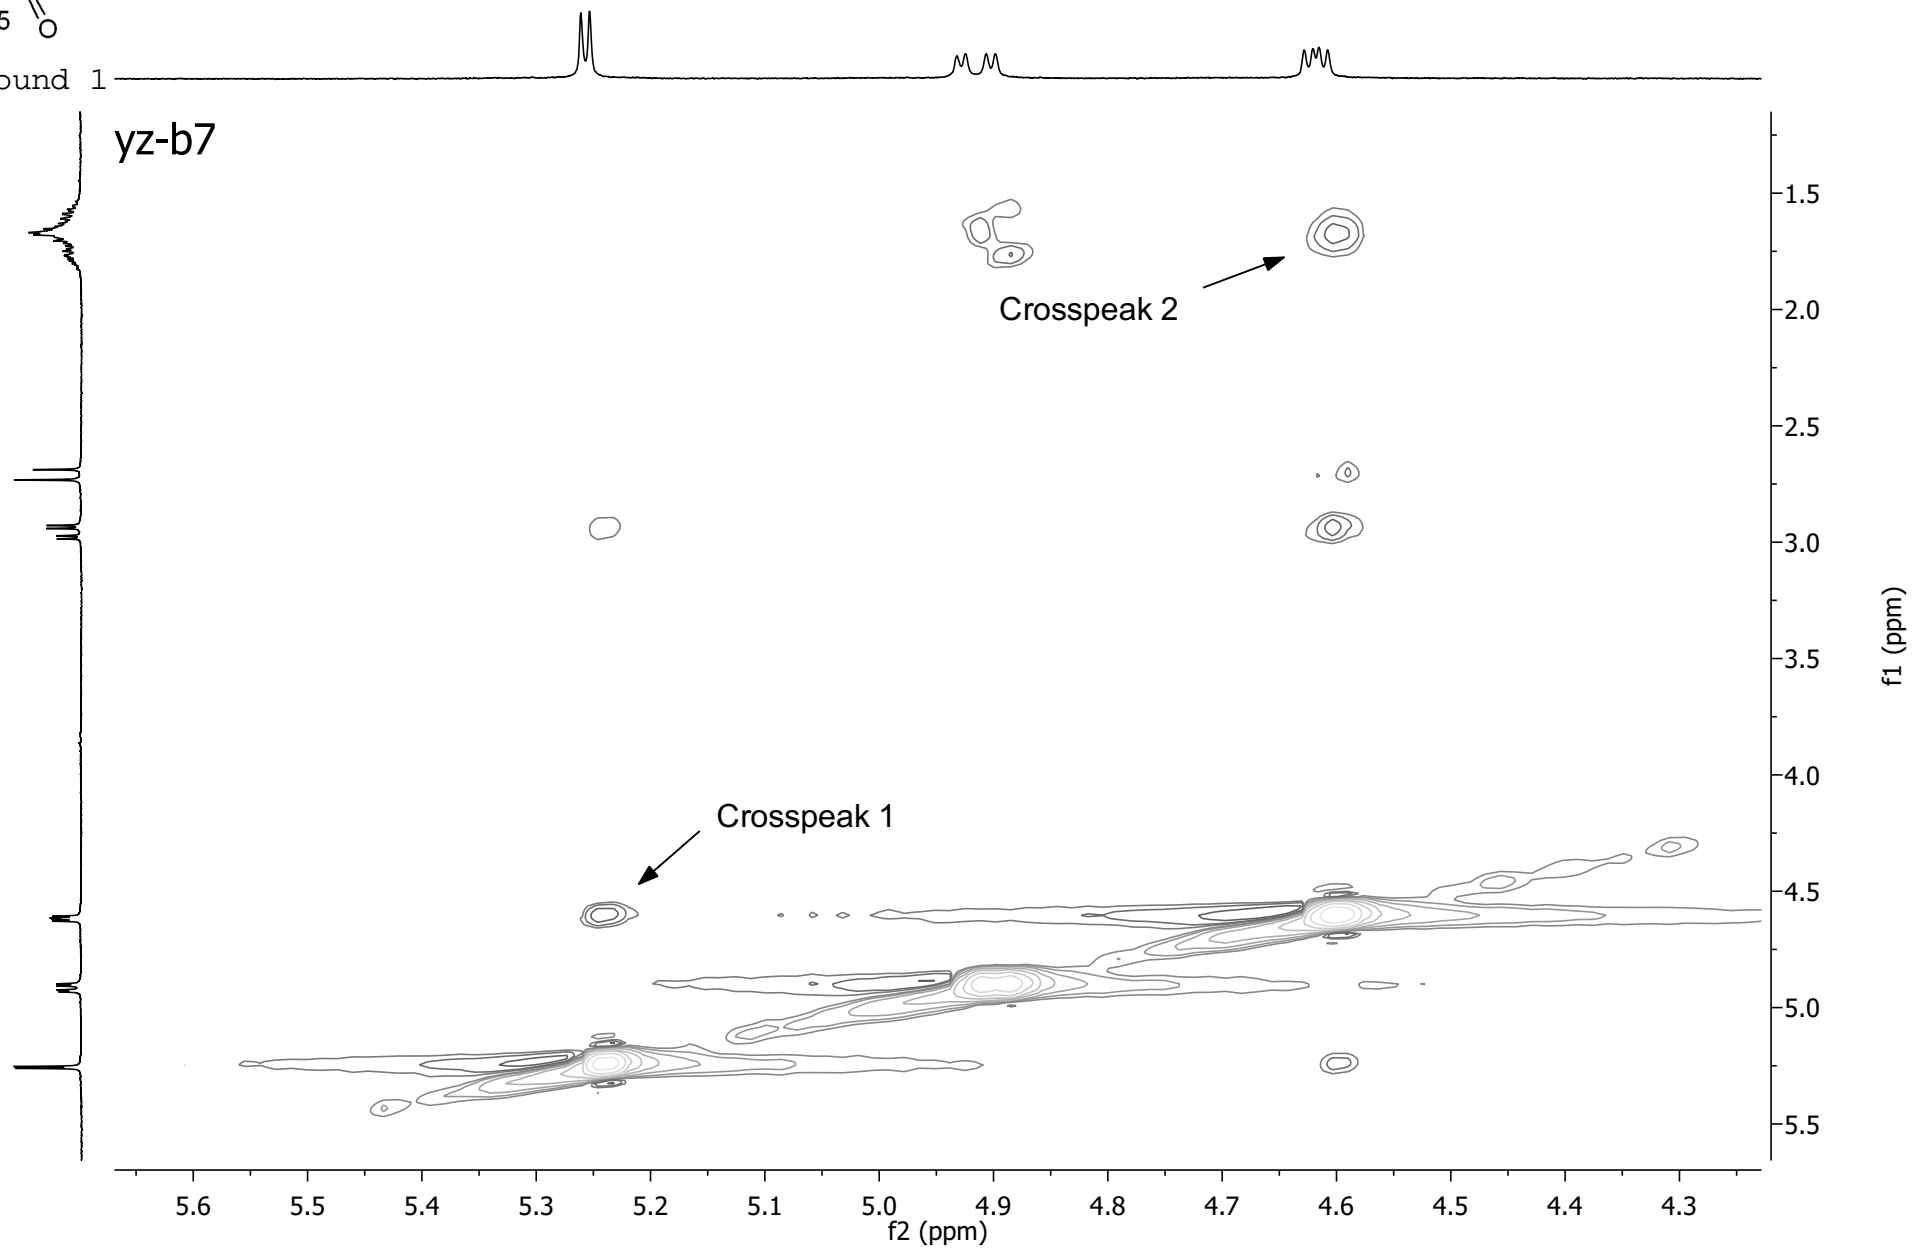

Supplement: NIHMS534561-supplement-1_si_001.pdf [file NIHMS534561-supplement-1_si_001.pdf]
